# Supplementary material for: The Cluster Transfer Function of AtNEET Supports the Ferredoxin–Thioredoxin Network of Plant Cells
Source: MDPI journal article supplement (doi:10.3390/antiox11081533), 2022-08-06
Supplement: s1 [file s1]

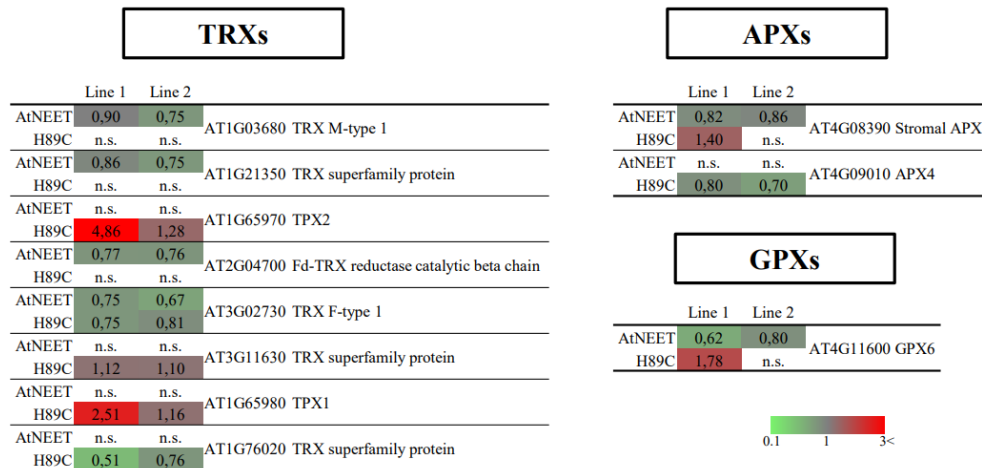

**Figure S2.** Changes in steady state expression of different transcripts involved in reactive oxygen species (ROS) scavenging reported previously [9] in two different lines with constitutive expression of AtNEET or H89C. Abbreviations used: APX, ascorbate peroxidase; GPX, glutathione peroxidase; n.s., not significant; TRX, thioredoxin.

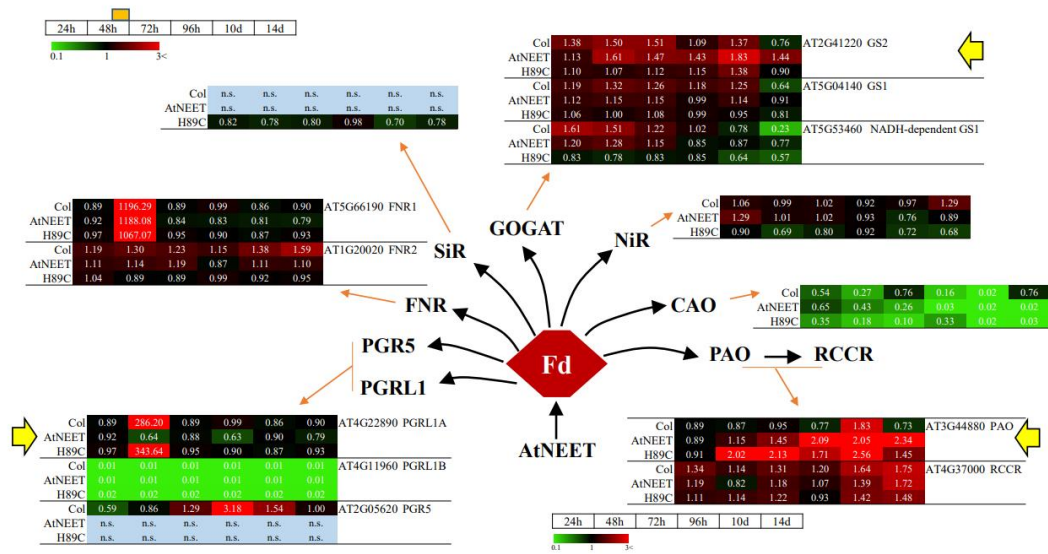

**Figure S3.** Changes in protein expression associated with other functions of ferredoxins during the course of the experiment. Pathway and heat maps for the expression of different proteins with a significant change in expression (in at least one time point, compared to time 0 h within each genotype) associated with additional ferredoxin functions in Arabidopsis at the different time points are shown. All experiments were repeated at least three times with similar results. Yellow arrows highlight proteins of interest. Abbreviations used: CAO, chlorophyll A oxygenase; Fd, ferredoxin; FNR, ferredoxin-NADP(+)-oxidoreductase; GOGAT, glutamine oxoglutarate aminotransferase; GS, glutamine synthase; NiR, nitrite reductase; PAO, pheophorbide A oxygenase, PGR5, proton gradient regulation 5; PGRL1A, proton gradient regulation 5-like A; PGRL1B, proton gradient regulation 5-like B; RCCR, red chlorophyll catabolite reductase; SiR, sulfite reductase.

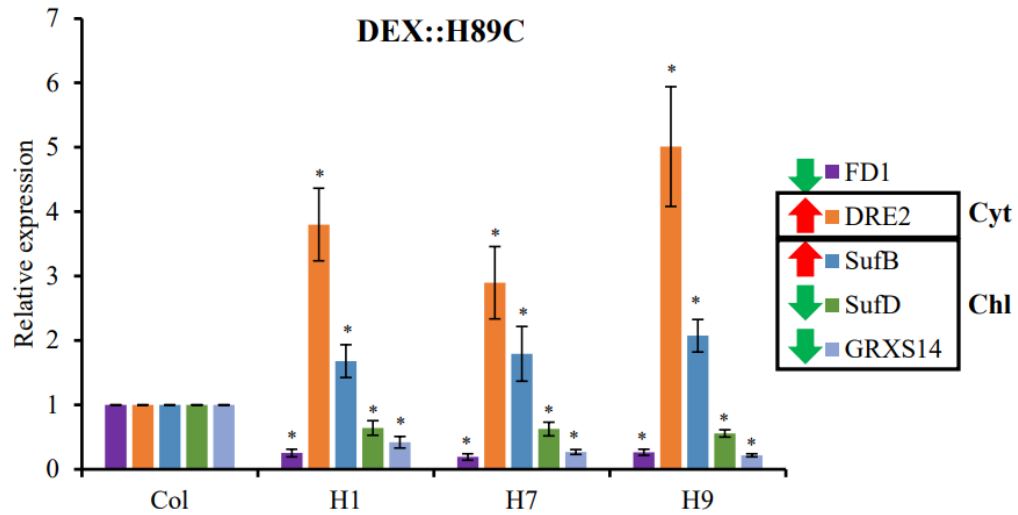

**Figure S4.** Changes in steady state expression of different transcript associated with iron-sulfur cluster assembly in the chloroplast and cytosol in three different homozygous H89C lines (H1, H7 and H9) following 4 doses of DEX application (Fig. 1A). All experiments were repeated at least three times with similar results. Asterisks denote statistical significance with respect to control (Col) at \*  $P < 0.05$  (Student t-test, SD, N=5). Abbreviations used: Chl, chloroplast; Cyt, cytosol; DEX, dexamethasone; DRE2, Homolog of Yeast DRE2; FD1, ferredoxin1; GRXS14, Glutaredoxin S14; SufB, Sulfur B; SufD, Sulfur D
