# Supplementary material for: The Cluster Transfer Function of AtNEET Supports the Ferredoxin–Thioredoxin Network of Plant Cells
Source: Antioxidants (Basel). 2022 Aug 6;11(8):1533. doi: 10.3390/antiox11081533 (PMC9405330; doi:10.3390/antiox11081533)
Supplement: Supplementary file 1 [file antioxidants-11-01533-s001.zip › antioxidants-1808438-supplementary.xlsx]

## Sheet: Table S1
Table S1. List of proteins altered following DEX treatment of Col and the inducible AtNEET and H89C lines. Fold change values (compared to time 0 h in each genotype) and p-values for each protein detected are shown. One-way ANOVA (time point) was used to determine statistically significant changes in protein abundance.
					p value			Fold change (compared to time 0 h in each genotype)
Access	Mass	Description	Peptides	UniquePep	Col	NEET	H89C	Col 0h	Col 24h	Col 48h	Col 72h	Col 96h	Col 10d	Col 14d	NEET 0h	NEET 24h	NEET 48h	NEET 72h	NEET 96h	NEET 10d	NEET 14d	H89C 0h	H89C 24h	H89C 48h	H89C 72h	H89C 96h	H89C 10d	H89C 14d
AT1G01050.1	24484	| pyrophosphorylase 1 | Chr1:31382-32670 REVERSE LENGTH=212 | 201606	6	3	0.00385453	0.00026364	4.81511e-05	1	1.07133	0.712874	1.12625	1.5192	1.13472	0.0148824	1	2.35004	1.29143	2.0398	2.26917	1.71956	0.0241417	1	0.926597	0.7977	0.994015	0.528043	0.652475	0.0116198
AT1G01080.1	32576	| RNA-binding (RRM/RBD/RNP motifs) family protein | Chr1:45503-46789 REVERSE LENGTH=293 | 201606	16	16	0.0239384	0.205586	0.00413311	1	0.808162	1.29801	1.45915	0.892685	0.959877	1.35326	1	1.01305	1.1386	1.18474	0.702555	0.788385	0.686182	1	0.932325	0.72046	0.833539	0.902169	0.561669	0.618722
AT1G01090.1	47174	| pyruvate dehydrogenase E1 alpha | Chr1:47705-49166 REVERSE LENGTH=428 | 201606	26	26	4.97799e-06	1.18905e-05	2.70106e-05	1	1.10893	0.847054	1.03981	1.10198	0.351142	0.670514	1	0.609479	0.919282	0.663665	0.324667	0.328048	0.296386	1	0.476937	0.448053	0.637375	0.660881	0.313391	0.430536
AT1G01100.1	11162	| 60S acidic ribosomal protein family | Chr1:50284-50954 REVERSE LENGTH=112 | 201606	3	2	0.0380823	0.226785	0.683608	1	1.26686	0.950502	1.31137	1.26288	0.693672	0.987787	1	0.967157	1.2591	1.14027	1.01775	0.729169	0.716119	1	0.807033	1.08812	0.958101	1.09265	0.876543	0.816326
AT1G01140.1	50505	| CBL-interacting protein kinase 9 | Chr1:64398-67512 REVERSE LENGTH=447 | 201606	4	3	0.00556903	0.0240173	0.00773044	1	8.87847	3.49996	0.891703	0.99196	6.09706	0.903238	1	3.61031	3.44016	5.8136	8.25627	10.7174	0.793008	1	3.88888	12.7965	15.555	9.24605	20.2304	0.928317
AT1G01300.1	52175	| Eukaryotic aspartyl protease family protein | Chr1:117065-118522 FORWARD LENGTH=485 | 201606	4	4	0.0232171	0.0167597	0.000183125	1	3.88842	1.89527	0.88626	0.630169	0.0517023	0.0541394	1	2.41804	1.39651	1.58381	0.760706	0.0573433	0.0563503	1	3.8396	0.218855	1.15303	0.92451	0.0519113	0.0554098
AT1G01320.1	198773	| Tetratricopeptide repeat (TPR)-like superfamily protein | Chr1:121582-130099 REVERSE LENGTH=1797 | 201606	37	32	9.31613e-07	1.39714e-06	4.6203e-05	1	0.88647	1.01071	0.864399	0.878804	0.446375	0.134414	1	0.707653	0.751648	0.626812	0.640124	0.470474	0.264819	1	0.678183	0.624542	0.63911	0.70639	0.493627	0.317361
AT1G01490.1	19781	| Heavy metal transport/detoxification superfamily protein | Chr1:180401-182066 REVERSE LENGTH=177 | 201606	4	4	0.00215707	0.135612	0.04204	1	6.58125	23.1098	23.5141	36.2475	43.0995	24.116	1	7.60873	5.61364	8.22354	7.95098	7.3221	7.84082	1	5.00705	3.53945	5.80314	2.99495	5.34887	6.58206
AT1G01560.2	42476	| MAP kinase 11 | Chr1:202345-204189 FORWARD LENGTH=369 | 201606	10	2	9.19915e-06	1.53889e-11	4.7554e-16	1	0.887847	0.866903	0.891703	75.1045	54.8402	0.903238	1	0.921884	0.846091	0.838015	90.014	42.9105	0.793008	1	0.965456	0.967021	0.948178	96.3148	86.8708	0.928317
AT1G01610.1	56262	| glycerol-3-phosphate acyltransferase 4 | Chr1:221950-224255 REVERSE LENGTH=503 | 201606	7	3	2.0954e-05	2.03897e-05	5.77964e-09	1	1.36254	1.60497	0.619391	0.526277	0.0788563	0.0836675	1	0.392102	0.211638	0.0737911	0.0104191	0.0713033	0.0699324	1	0.355538	0.298671	0.0149661	0.100143	0.0540198	0.0146526
AT1G01620.1	30633	| plasma membrane intrinsic protein 1C | Chr1:225986-227176 REVERSE LENGTH=286 | 201606	16	5	0.013112	0.426214	0.000302624	1	2.09447	3.24633	3.21177	3.50514	2.38533	1.65895	1	2.38557	1.65547	2.02707	1.91142	1.62768	2.70926	1	2.25971	3.15413	1.32117	2.12405	1.47879	4.71685
AT1G01630.1	29216	| Sec14p-like phosphatidylinositol transfer family protein | Chr1:229206-230675 FORWARD LENGTH=255 | 201606	5	5	0.33114	0.801727	0.643732	1	0.884046	1.23978	2.94041	2.83101	1.65407	1.76135	1	1.59219	1.17676	1.94183	0.845305	2.42051	1.06411	1	0.954628	0.937387	0.706606	0.696615	0.253213	1.14627
AT1G01710.1	48155	| acyl-CoA thioesterase II | Chr1:262950-266029 FORWARD LENGTH=427 | 201606	6	6	4.95034e-05	0.0593529	0.572125	1	2.43106	0.455146	0.260101	0.739233	0.665945	0.0673116	1	0.360738	0.122297	1.03844	1.30189	1.09211	0.990423	1	0.847043	0.581409	0.94458	0.908881	1.31086	0.254201
AT1G01790.1	128033	| K+ efflux antiporter 1 | Chr1:284781-290869 FORWARD LENGTH=1193 | 201606	28	17	0.00102786	0.000173238	0.155094	1	1.046	1.35625	0.994278	0.905723	0.917049	0.403719	1	0.638373	0.720759	0.6798	0.525317	0.795618	0.452715	1	1.00367	1.12597	1.01986	1.10254	0.889646	0.589828
AT1G01800.1	31660	| NAD(P)-binding Rossmann-fold superfamily protein | Chr1:293396-294888 FORWARD LENGTH=295 | 201606	18	18	0.0664916	0.368954	0.0353392	1	1.18489	0.869827	1.04007	1.57211	1.12085	1.20125	1	0.944535	0.863986	0.990439	0.782663	0.891272	1.16125	1	0.857251	0.74537	1.03799	0.945861	0.673975	0.93014
AT1G01820.1	25912	| peroxin 11c | Chr1:296213-297723 REVERSE LENGTH=235 | 201606	7	4	0.187988	0.00379721	0.328945	1	1.04053	0.743986	0.350237	0.459485	0.731579	0.15587	1	0.41991	0.566352	0.840987	1.99937	2.09231	1.52502	1	0.816342	1.42102	1.08985	1.66176	1.46638	0.363116
AT1G01910.1	39671	| P-loop containing nucleoside triphosphate hydrolases superfamily protein | Chr1:313595-315831 REVERSE LENGTH=353 | 201606	12	9	0.265471	0.274509	0.547856	1	1.53325	1.68142	1.72952	1.34265	1.42425	1.16638	1	1.06931	1.16085	1.19628	1.17284	1.28125	0.920599	1	0.777621	0.744014	0.866386	0.866606	0.765406	0.783089
AT1G01940.1	17503	| Cyclophilin-like peptidyl-prolyl cis-trans isomerase family protein | Chr1:323082-324719 FORWARD LENGTH=160 | 201606	2	2	0.000583815	0.000161996	7.66997e-07	1	0.547228	0.0522821	0.0537778	0.0598242	0.0520214	0.0544735	1	0.915423	0.0362005	0.0358549	0.0353249	0.0345272	0.0339293	1	1.24839	0.0288972	0.0283341	0.0269992	0.0259891	0.0277406
AT1G01960.1	194941	| SEC7-like guanine nucleotide exchange family protein | Chr1:330830-337582 REVERSE LENGTH=1750 | 201606	15	13	0.0127143	0.0435369	0.742511	1	1.31146	1.23923	0.758356	0.827711	0.364084	0.148296	1	0.61459	1.784	1.1161	1.27151	1.21547	0.669921	1	0.918847	1.54054	1.44402	1.19645	1.32869	0.539202
AT1G02020.1	71366	| nitroreductase family protein | Chr1:352842-354845 REVERSE LENGTH=642 | 201606	4	4	0.243188	0.00676084	0.0450142	1	0.449654	0.855261	0.871131	0.34882	0.579306	0.0447606	1	0.314121	0.439549	0.97213	0.156486	0.400772	0.0393831	1	1.1399	1.31883	1.32072	0.533379	1.01836	0.0548026
AT1G02080.1	269885	| transcription regulator | Chr1:373335-386682 FORWARD LENGTH=2431 | 201606	15	15	0.000570646	0.19657	0.661939	1	0.714559	0.850043	0.305884	0.312092	0.447193	0.0779568	1	0.410769	0.842957	0.534771	0.84737	0.973602	0.607159	1	1.25841	1.33635	1.16399	1.28119	1.17193	0.497014
AT1G02090.1	29469	| Proteasome component (PCI) domain protein | Chr1:387479-389568 REVERSE LENGTH=260 | 201606	4	4	0.23203	0.0685571	0.500436	1	0.739791	0.8639	0.450745	0.658512	0.570327	1.34796	1	1.56158	1.45699	0.250473	0.792621	0.788478	1.74657	1	1.12585	0.834301	0.334427	0.745973	0.43296	0.768983
AT1G02120.1	67702	| GRAM domain family protein | Chr1:395761-399720 FORWARD LENGTH=598 | 201606	6	6	0.00274829	0.051354	0.178467	1	1.47604	1.59008	0.315924	1.33009	1.57631	0.179868	1	0.801221	0.849332	0.521235	1.34672	1.32336	1.19924	1	0.591947	0.35887	0.936002	0.901365	0.860894	0.497347
AT1G02130.1	22648	| RAS 5 | Chr1:400350-401788 REVERSE LENGTH=203 | 201606	10	4	0.0492199	0.0372624	0.12273	1	1.77251	1.26235	1.29774	2.14748	1.18489	0.410884	1	0.5185	0.40227	0.578039	0.90629	0.595947	0.690942	1	0.964484	1.39805	1.32318	0.899777	1.16701	0.489328
AT1G02140.1	17458	| mago nashi family protein | Chr1:403467-404401 REVERSE LENGTH=150 | 201606	2	2	0.142738	0.0306099	0.0120465	1	0.522732	0.372624	0.0383284	0.426378	0.612307	0.27244	1	1.36391	0.247076	0.444004	0.235632	1.00589	0.795221	1	0.947482	0.50475	0.069801	0.461664	1.91014	1.36338
AT1G02150.1	59883	| Tetratricopeptide repeat (TPR)-like superfamily protein | Chr1:408779-410433 FORWARD LENGTH=524 | 201606	19	19	3.33921e-05	6.0372e-05	0.0005704	1	0.760145	0.865484	0.807923	0.542064	0.140552	0.0507404	1	0.585427	0.690727	0.440254	0.270188	0.288269	0.107187	1	0.833329	0.424309	0.630397	0.727196	0.3628	0.206535
AT1G02170.1	39792	| metacaspase 1 | Chr1:411883-413426 FORWARD LENGTH=367 | 201606	3	3	0.682052	0.242225	0.00734362	1	1.05131	0.304528	0.45715	0.514633	0.718703	0.620375	1	0.661061	0.251016	0.254034	0.798451	0.803636	1.0136	1	1.44581	0.958162	0.487741	1.57687	1.73048	1.62377
AT1G02280.1	32925	| translocon at the outer envelope membrane of chloroplasts 33 | Chr1:448665-450246 REVERSE LENGTH=297 | 201606	9	9	8.15996e-05	6.75834e-05	0.00919603	1	0.465475	0.66192	0.431093	0.752726	0.380026	0.112378	1	0.346816	0.37052	0.235179	0.272531	0.252427	0.0514183	1	0.691673	0.271164	0.4941	0.649712	0.413114	0.310521
AT1G02305.1	40033	| Cysteine proteinases superfamily protein | Chr1:455816-457974 FORWARD LENGTH=362 | 201606	5	4	0.00387462	0.193776	0.000757247	1	5.27195	2.94091	3.01475	7.53031	7.32652	8.46784	1	1.52224	1.96875	2.78921	2.66159	2.42504	3.40793	1	2.1663	1.21406	1.6473	3.15875	5.20551	2.55717
AT1G02335.1	23441	| germin-like protein subfamily 2 member 2 precursor | Chr1:463979-464876 REVERSE LENGTH=219 | 201606	4	2	0.0112632	1.30962e-07	0.000122045	1	0.887847	0.866903	0.891703	13.194	17.3895	21.0706	1	0.921884	3.44016	0.838015	29.9362	18.7872	44.9582	1	0.965456	12.7965	0.948178	30.3537	60.4481	52.6548
AT1G02360.1	30137	| Chitinase family protein | Chr1:472138-473116 REVERSE LENGTH=272 | 201606	2	2	4.60831e-06	3.91229e-05	4.57827e-05	1	0.887847	0.866903	11.8043	0.99196	8.62579	0.903238	1	0.921884	0.846091	11.2319	0.825627	13.4921	0.793008	1	0.965456	0.967021	9.48178	0.903506	23.3542	0.928317
AT1G02360.2	35603	| Chitinase family protein | Chr1:472138-473254 REVERSE LENGTH=318 | 201606	2	2	0.000622677	3.91229e-05	4.57827e-05	1	0.217776	0.212638	2.89542	0.243313	2.11578	0.221551	1	0.921884	0.846091	11.2319	0.825627	13.4921	0.793008	1	0.965456	0.967021	9.48178	0.903506	23.3542	0.928317
AT1G02410.1	32605	| cytochrome c oxidase assembly protein CtaG / Cox11 family | Chr1:491300-492762 FORWARD LENGTH=287 | 201606	3	3	0.125536	0.183943	0.784128	1	1.18771	1.46087	0.600318	0.500467	1.01362	1.06406	1	0.934744	2.27375	1.69242	2.39858	2.43011	2.38301	1	0.802438	1.2438	0.783312	1.20054	1.30603	1.38642
AT1G02475.1	25037	| Polyketide cyclase/dehydrase and lipid transport superfamily protein | Chr1:514110-515331 REVERSE LENGTH=219 | 201606	8	8	0.0543363	0.00209675	0.0280583	1	1.48363	1.01041	1.79258	1.48403	2.4737	1.05932	1	0.923613	0.767555	0.990297	0.974052	1.17624	1.72845	1	1.38655	1.35586	1.46474	0.900173	2.59981	1.53508
AT1G02500.1	43158	| S-adenosylmethionine synthetase 1 | Chr1:519037-520218 FORWARD LENGTH=393 | 201606	47	15	2.66412e-05	0.0012857	0.0202945	1	1.02422	1.10731	0.946488	0.914125	0.609749	1.20286	1	1.21753	1.28841	1.1506	1.15097	0.807033	0.810029	1	1.26948	1.08769	0.989388	1.09914	1.02278	0.897633
AT1G02560.1	32356	| nuclear encoded CLP protease 5 | Chr1:538000-539805 FORWARD LENGTH=298 | 201606	15	14	0.0192575	0.0710086	0.29047	1	0.939336	1.08046	1.42059	1.11177	0.788458	0.918466	1	1.09385	1.13163	1.14292	0.755881	0.799045	0.978658	1	0.826447	1.01085	0.935962	0.789904	0.830713	0.884746
AT1G02690.1	59389	| importin alpha isoform 6 | Chr1:584397-587036 FORWARD LENGTH=538 | 201606	3	1	1.19884e-05	6.3215e-05	0.000223558	1	0.889559	1.08953	0.0335463	0.037318	0.0324507	0.0339803	1	0.920423	1.5632	0.0419007	0.0412814	0.0403492	0.0396504	1	1.10602	0.676339	0.040598	0.0386853	0.037238	0.0397476
AT1G02780.1	24606	| Ribosomal protein L19e family protein | Chr1:608120-609391 REVERSE LENGTH=214 | 201606	11	7	0.0486271	0.00223386	0.170964	1	0.903482	0.721391	0.680428	0.567933	0.379874	0.59906	1	0.639981	0.911143	0.562127	0.710671	0.59571	0.552897	1	1.11582	1.48615	1.1592	0.872268	0.939506	0.607283
AT1G02816.1	18496	| pectinesterase (Protein of unknown function%2C DUF538) | Chr1:621637-622137 FORWARD LENGTH=166 | 201606	4	3	0.00196339	0.00130878	0.225961	1	2.23815	0.672809	1.34704	1.23605	3.90093	1.1557	1	1.17767	1.50422	2.33002	3.94472	4.51785	4.43481	1	1.44947	1.72959	2.3649	1.80774	3.02627	2.16312
AT1G02840.1	33729	| RNA-binding (RRM/RBD/RNP motifs) family protein | Chr1:626918-629583 FORWARD LENGTH=303 | 201606	4	2	0.0272126	0.00227303	0.0507763	1	17.848	6.06149	0.891703	7.03895	20.0319	21.0904	1	1.70819	5.2012	0.22009	7.08692	5.6736	2.13095	1	2.27983	3.62565	0.134324	0.954568	3.24741	2.19241
AT1G02880.2	29590	| thiamin pyrophosphokinase1 | Chr1:643063-644476 REVERSE LENGTH=264 | 201606	2	2	4.02099e-08	0.000490683	0.000344819	1	1.07091	0.522821	0.0537778	0.0598242	0.0520214	0.0544735	1	0.558991	0.532403	0.0508136	0.0500625	0.048932	0.0480846	1	1.70015	0.783914	0.0714641	0.0680971	0.0655494	0.0699671
AT1G02880.3	29879	| thiamin pyrophosphokinase1 | Chr1:643063-644485 REVERSE LENGTH=267 | 201606	4	4	0.025379	0.00193077	0.00142619	1	1.07091	0.522821	0.0537778	0.409652	1.5571	1.63152	1	0.558991	0.532403	0.0508136	1.12728	1.62575	2.55222	1	1.70015	0.783914	0.0714641	2.26932	2.83159	3.50312
AT1G02910.1	50739	| tetratricopeptide repeat (TPR)-containing protein | Chr1:655749-658125 REVERSE LENGTH=453 | 201606	13	13	0.00309388	0.000142121	0.383804	1	0.964347	0.874003	1.04174	1.5202	0.54033	0.151146	1	0.763542	0.535064	0.53105	0.238998	0.509899	0.183542	1	0.915317	1.18755	1.15452	1.00267	0.593031	0.685508
AT1G02920.1	23598	| glutathione S-transferase 7 | Chr1:658886-659705 REVERSE LENGTH=209 | 201606	36	15	4.35547e-12	6.88776e-09	1.11712e-08	1	1.07785	2.4508	2.27993	1.92005	3.46535	6.05821	1	1.212	5.25524	4.80801	7.34369	3.45746	5.03869	1	1.86406	3.14247	5.74324	5.72553	8.83982	6.7559
AT1G02930.1	23486	| glutathione S-transferase 6 | Chr1:661363-662191 REVERSE LENGTH=208 | 201606	35	13	7.89427e-09	6.10848e-09	1.39286e-08	1	0.864295	2.15696	1.88117	1.52037	2.68514	5.20541	1	1.17309	5.4683	4.42997	7.45249	3.40966	5.42255	1	1.84499	3.12193	5.11895	5.24604	8.61641	6.6732
AT1G03030.1	34057	| P-loop containing nucleoside triphosphate hydrolases superfamily protein | Chr1:701621-703568 FORWARD LENGTH=301 | 201606	5	5	0.00132317	2.72398e-05	4.51641e-05	1	0.887847	11.5946	8.91703	3.8726	29.1595	33.1361	1	0.921884	25.348	25.103	27.7893	26.9433	44.8266	1	0.965456	12.6698	9.48178	42.2674	31.6643	37.1789
AT1G03030.2	33247	| P-loop containing nucleoside triphosphate hydrolases superfamily protein | Chr1:701621-703447 FORWARD LENGTH=294 | 201606	5	5	0.00132317	2.72398e-05	0.000109883	1	0.887847	11.5946	8.91703	3.8726	29.1595	33.1361	1	0.921884	25.348	25.103	27.7893	26.9433	44.8266	1	6.76011	12.6698	9.48178	42.2674	31.6643	37.1789
AT1G03090.2	80451	| methylcrotonyl-CoA carboxylase alpha chain | Chr1:739715-743819 FORWARD LENGTH=734 | 201606	18	18	0.142414	0.0303864	0.00212893	1	0.769574	0.812404	0.838641	1.02146	1.26694	0.875579	1	1.22321	1.47007	1.33014	1.05793	1.60653	1.60932	1	1.09952	1.38029	1.64381	1.18334	2.03642	1.79256
AT1G03130.1	22307	| photosystem I subunit D-2 | Chr1:753528-754142 REVERSE LENGTH=204 | 201606	81	2	2.00509e-05	0.000367725	0.0649248	1	0.892591	0.85323	1.00096	0.934994	1.04342	1.17234	1	1.12775	0.942193	1.02346	0.814886	0.972052	0.931342	1	1.04648	1.08457	0.910374	0.85851	0.777339	0.959872
AT1G03160.1	100730	| FZO-like protein | Chr1:761321-766053 FORWARD LENGTH=912 | 201606	27	27	0.00241984	0.000758738	0.00335948	1	1.34392	1.01287	1.19671	0.847851	1.30418	0.484914	1	1.13219	0.568277	0.96281	0.748577	0.829018	0.563027	1	0.822387	0.498288	0.696818	0.665728	0.544336	0.368203
AT1G03160.4	97084	| FZO-like protein | Chr1:761321-766053 FORWARD LENGTH=883 | 201606	25	25	1.67886e-05	3.23532e-10	1.55749e-07	1	0.887847	138.261	0.891703	115.735	0.862579	66.1928	1	0.921884	95.801	0.838015	126.196	0.806983	94.916	1	0.965456	113.043	0.948178	151.029	0.869703	83.5315
AT1G03220.1	45717	| Eukaryotic aspartyl protease family protein | Chr1:787143-788444 FORWARD LENGTH=433 | 201606	12	10	0.0282636	0.000490428	0.00415051	1	1.96646	1.05322	1.1331	1.84968	0.988256	0.709377	1	0.980213	0.638664	0.685903	1.49742	1.21535	0.948164	1	2.54651	1.06572	2.67842	1.64724	3.39427	1.68871
AT1G03230.1	46148	| Eukaryotic aspartyl protease family protein | Chr1:790110-791414 FORWARD LENGTH=434 | 201606	11	9	0.0472154	0.221227	0.000117736	1	2.66995	1.49708	1.52602	2.53976	2.50933	0.284547	1	0.875976	0.618795	0.732954	1.07213	1.41271	1.15972	1	4.1493	1.24681	2.83178	3.24256	3.72923	2.66394
AT1G03310.1	98884	| debranching enzyme 1 | Chr1:813975-816623 FORWARD LENGTH=882 | 201606	5	5	2.38444e-06	0.0363288	0.000270685	1	0.0267106	0.783954	0.80764	0.992891	1.47161	0.271737	1	0.0280491	0.511313	1.01266	0.821018	1.06144	0.956144	1	0.0484846	2.09953	1.2629	1.50724	0.723862	1.55378
AT1G03400.1	39131	| 2-oxoglutarate (2OG) and Fe(II)-dependent oxygenase superfamily protein | Chr1:842895-844158 REVERSE LENGTH=351 | 201606	4	4	0.142137	0.24437	0.130012	1	1.92748	1.25352	0.264014	1.44413	1.26303	0.478704	1	0.286148	0.452579	0.850569	1.65859	0.45004	1.20692	1	0.388888	0.966574	2.58199	2.70091	2.60469	1.85955
AT1G03475.1	43796	| Coproporphyrinogen III oxidase | Chr1:869302-871175 REVERSE LENGTH=386 | 201606	40	40	0.000403012	0.00320661	0.164463	1	1.11668	1.10102	1.32857	1.13537	0.949917	1.32194	1	1.25666	1.18409	1.21171	0.953362	0.842382	0.911531	1	1.04543	0.901406	1.02286	0.983939	0.809455	0.971938
AT1G03600.1	18835	| photosystem II family protein | Chr1:898916-899440 FORWARD LENGTH=174 | 201606	40	40	0.0018694	0.437645	0.00566706	1	0.879723	1.28378	1.4708	1.30758	1.20391	1.51947	1	1.20691	1.18825	1.14429	0.938966	1.07832	1.04124	1	1.20834	1.28515	1.07812	1.03899	0.835509	1.06634
AT1G03630.1	43883	| protochlorophyllide oxidoreductase C | Chr1:907699-909245 FORWARD LENGTH=401 | 201606	41	36	2.38573e-05	7.11845e-08	3.97906e-08	1	0.821483	0.737268	0.781468	0.851534	0.549724	1.13724	1	0.908039	0.717049	0.65857	0.497104	0.506154	0.381131	1	0.679349	0.69449	0.582869	0.715834	0.38578	0.592857
AT1G03680.1	19665	| thioredoxin M-type 1 | Chr1:916990-917865 REVERSE LENGTH=179 | 201606	18	18	0.000153598	0.0153124	0.0243211	1	0.899138	1.06803	1.04699	0.968933	1.14284	1.99455	1	1.25698	1.25864	1.33141	0.856201	1.2028	1.64799	1	0.636048	0.963299	0.949855	0.944573	0.945965	1.08859
AT1G03860.1	31811	| prohibitin 2 | Chr1:979611-981157 REVERSE LENGTH=286 | 201606	25	19	0.206497	0.000763165	0.0476588	1	1.10784	1.12039	1.15189	1.05982	1.17808	0.94169	1	1.03141	1.3697	1.35521	1.56287	1.37249	1.6216	1	1.06648	1.30685	1.41104	1.33057	1.46082	1.29786
AT1G03870.1	26115	| FASCICLIN-like arabinoogalactan 9 | Chr1:982625-983368 REVERSE LENGTH=247 | 201606	6	2	0.0436676	0.154473	0.521277	1	0.935215	1.41114	1.08344	1.56795	1.31903	0.808175	1	0.870409	0.541438	0.937768	0.766423	0.762269	0.509008	1	0.697212	1.02174	1.25029	1.10125	0.917359	0.926083
AT1G03900.1	29795	| non-intrinsic ABC protein 4 | Chr1:991252-992852 FORWARD LENGTH=272 | 201606	4	4	0.0187182	0.000501547	0.000436605	1	11.875	23.0303	17.7677	3.8726	28.3525	39.2071	1	9.21884	33.8436	25.0029	26.9842	26.9023	28.9664	1	12.9028	18.7956	18.9636	33.0694	28.8833	30.9228
AT1G04040.1	31096	| HAD superfamily%2C subfamily IIIB acid phosphatase | Chr1:1042564-1043819 REVERSE LENGTH=271 | 201606	22	15	2.25436e-06	0.000470473	0.243028	1	0.938081	1.09868	1.2873	1.51966	1.66106	0.659252	1	0.613526	0.764761	1.01728	0.945957	1.21362	1.22708	1	1.32582	0.976261	1.34149	1.09932	1.08851	1.01917
AT1G04080.1	85242	| Tetratricopeptide repeat (TPR)-like superfamily protein | Chr1:1051803-1056550 FORWARD LENGTH=768 | 201606	14	14	0.0104703	0.0141017	0.485993	1	1.66325	1.03296	1.1729	1.50374	1.56469	0.623222	1	1.78376	2.29804	2.04109	2.23157	2.36705	2.20872	1	0.929665	1.13532	1.245	1.28758	1.23952	1.10631
AT1G04080.3	91152	| Tetratricopeptide repeat (TPR)-like superfamily protein | Chr1:1051803-1056550 FORWARD LENGTH=823 | 201606	14	14	0.000213982	1.0856e-06	2.9423e-06	1	1.66325	1.03296	1.1729	1.50374	1.56469	0.0169983	1	1.78376	2.29804	2.04109	2.23157	2.36705	0.0170141	1	0.929665	1.13532	1.245	1.28758	1.23952	0.0107194
AT1G04130.1	40510	| Tetratricopeptide repeat (TPR)-like superfamily protein | Chr1:1073465-1075374 FORWARD LENGTH=360 | 201606	2	2	0.0206719	0.490894	8.22913e-05	1	0.887847	6.06149	11.9651	0.99196	9.07404	0.903238	1	0.228465	0.852554	1.44911	0.20461	0.79051	0.196526	1	0.965456	0.967021	9.68563	0.903506	20.2746	0.928317
AT1G04170.1	50853	| eukaryotic translation initiation factor 2 gamma subunit | Chr1:1097423-1099702 FORWARD LENGTH=465 | 201606	17	17	0.00127849	0.0554331	0.178556	1	0.789473	0.837903	0.706611	0.751901	0.722067	0.239369	1	0.759025	0.747129	0.75504	0.958725	0.728229	0.509704	1	1.3426	1.06362	1.05833	1.05351	1.06152	0.877867
AT1G04270.1	17129	| cytosolic ribosomal protein S15 | Chr1:1141852-1142960 REVERSE LENGTH=152 | 201606	11	4	0.000125315	9.06314e-05	0.000819306	1	0.968652	0.922777	0.892405	0.876254	0.521065	0.4862	1	0.970502	1.05295	0.793986	0.892762	0.567091	0.473426	1	0.979822	0.869364	0.838378	0.709368	0.494462	0.647492
AT1G04350.1	40797	| 2-oxoglutarate (2OG) and Fe(II)-dependent oxygenase superfamily protein | Chr1:1165296-1166538 FORWARD LENGTH=360 | 201606	8	8	0.317547	0.000221937	0.0145557	1	1.21241	1.30329	1.09387	0.992353	1.48531	0.906303	1	1.98172	1.41152	2.39396	1.63284	4.84438	3.82168	1	0.80274	1.59608	1.96521	1.7261	1.80141	1.31308
AT1G04410.1	35571	| Lactate/malate dehydrogenase family protein | Chr1:1189418-1191267 REVERSE LENGTH=332 | 201606	51	35	0.00651635	0.00305619	0.700571	1	0.830903	0.771322	0.932898	0.939732	0.814383	1.0918	1	1.04355	0.856408	1.05106	1.23144	0.854404	1.04494	1	0.989996	0.964557	1.08603	0.966761	0.989031	1.05615
AT1G04420.1	46427	| NAD(P)-linked oxidoreductase superfamily protein | Chr1:1191634-1193699 FORWARD LENGTH=412 | 201606	28	28	0.493791	4.87724e-05	0.395087	1	0.813578	0.800312	0.870767	0.921816	0.894176	0.76553	1	0.907293	0.612834	0.933239	0.644302	0.871019	0.674945	1	1.02245	0.936044	0.959345	0.865766	0.796181	0.826948
AT1G04430.1	70508	| S-adenosyl-L-methionine-dependent methyltransferases superfamily protein | Chr1:1198860-1201301 FORWARD LENGTH=623 | 201606	15	10	1.9829e-08	0.000204149	1.491e-05	1	1.38449	1.14568	0.733785	1.10545	0.253362	0.29218	1	0.82003	0.639098	0.43609	0.263833	0.2919	0.142481	1	0.789929	0.599168	0.39259	0.228946	0.125955	0.185028
AT1G04480.1	15027	| Ribosomal protein L14p/L23e family protein | Chr1:1216110-1217257 FORWARD LENGTH=140 | 201606	18	18	0.000112343	0.0011174	0.00645087	1	0.722534	0.761135	0.809343	0.919643	0.682122	0.714212	1	1.0421	0.865359	0.805065	0.831812	0.691388	0.609865	1	1.06082	0.850691	0.914932	0.92554	0.742962	0.762552
AT1G04510.1	56866	| MOS4-associated complex 3A | Chr1:1226749-1230592 FORWARD LENGTH=523 | 201606	12	11	0.0863489	0.556891	0.829868	1	0.985693	0.927734	0.887835	0.837455	0.60474	0.63465	1	0.840849	1.19954	0.775139	0.80148	1.02055	0.850144	1	1.04968	1.14028	1.18872	1.06239	1.20801	0.848502
AT1G04530.1	34553	| Tetratricopeptide repeat (TPR)-like superfamily protein | Chr1:1234456-1235895 REVERSE LENGTH=310 | 201606	10	10	0.0548423	0.326425	0.0716456	1	1.26307	1.51326	1.26968	1.23121	1.28685	1.60995	1	0.930772	1.02065	0.823864	0.858746	0.772161	0.955349	1	0.85978	0.763005	0.944889	0.904604	1.05926	1.2548
AT1G04620.1	51662	| coenzyme F420 hydrogenase family / dehydrogenase%2C beta subunit family | Chr1:1282869-1286492 REVERSE LENGTH=462 | 201606	14	14	0.00131678	0.00468603	0.00228045	1	1.3234	1.65989	1.10965	1.55632	2.57422	0.748602	1	1.26039	1.00431	1.23678	0.814043	2.01949	1.83934	1	0.968323	2.3266	1.42	1.8753	2.98029	1.66078
AT1G04630.1	16126	| GRIM-19 protein | Chr1:1289921-1290986 REVERSE LENGTH=143 | 201606	8	1	1.26784e-05	3.02743e-06	0.000447949	1	0.887847	75.3624	26.6566	46.3973	60.2426	36.1172	1	0.921884	78.8098	30.7314	43.5652	88.5914	89.7848	1	0.965456	57.7678	43.6285	57.252	107.455	61.7412
AT1G04640.1	26421	| lipoyltransferase 2 | Chr1:1292541-1293248 FORWARD LENGTH=235 | 201606	9	9	0.000217621	0.270741	0.0300166	1	4.60467	8.1719	9.25966	9.27221	8.94313	12.7586	1	1.31616	1.59781	2.21924	1.94782	1.95812	1.75771	1	0.685422	0.786658	1.22082	1.44278	1.49083	1.2069
AT1G04690.1	36539	| potassium channel beta subunit 1 | Chr1:1313662-1315420 FORWARD LENGTH=328 | 201606	21	21	0.0123078	0.0164268	0.000252354	1	1.35199	1.15824	2.17681	1.84341	2.45884	2.1487	1	1.50776	1.36913	1.48118	2.14033	2.07764	2.12995	1	1.26678	1.23319	1.88875	1.44106	2.25678	1.91152
AT1G04710.1	46611	| peroxisomal 3-ketoacyl-CoA thiolase 4 | Chr1:1321941-1324556 FORWARD LENGTH=443 | 201606	14	6	0.0559882	0.0219131	0.623969	1	0.858757	0.838388	0.959285	1.06877	0.68124	1.45507	1	1.64764	1.51806	1.54624	1.57258	1.07807	1.27202	1	1.25886	1.06929	1.30189	1.21048	1.07206	1.05626
AT1G04750.1	24765	| vesicle-associated membrane protein 721 | Chr1:1331857-1333426 REVERSE LENGTH=219 | 201606	12	12	6.65131e-13	4.01152e-11	1.66909e-10	1	0.887847	0.866903	0.891703	39.722	89.0676	0.903238	1	0.921884	0.846091	0.838015	73.0647	104.949	0.793008	1	0.965456	0.967021	0.948178	105.283	153.865	0.928317
AT1G04810.1	108866	| 26S proteasome regulatory complex%2C non-ATPase subcomplex%2C Rpn2/Psmd1 subunit | Chr1:1350304-1355261 FORWARD LENGTH=1001 | 201606	21	5	0.000178599	0.0580172	0.141992	1	1.54987	0.949826	0.787321	0.581861	0.917031	0.187061	1	0.695013	0.981194	0.748082	1.17188	1.09838	1.05933	1	0.920023	1.26328	1.00968	1.09622	1.34433	0.773207
AT1G04820.1	49541	| tubulin alpha-4 chain | Chr1:1356421-1358266 REVERSE LENGTH=450 | 201606	55	2	0.000195309	8.20271e-06	0.00504907	1	1.1251	1.00989	1.13821	1.09052	0.673044	1.19025	1	1.06201	0.84222	0.851673	0.687248	0.660691	0.54503	1	1.45749	1.12575	1.14633	0.80982	0.838642	1.38008
AT1G04870.2	43130	| protein arginine methyltransferase 10 | Chr1:1373485-1375598 REVERSE LENGTH=383 | 201606	4	4	8.99377e-05	0.0852562	0.0148481	1	0.877174	1.29208	0.886723	0.0739233	0.0642816	0.0673116	1	0.574776	1.5739	0.858479	0.988157	0.0498094	0.0489468	1	0.959884	0.566567	1.14896	1.08484	0.0519781	0.0554812
AT1G04980.1	48403	| PDI-like 2-2 | Chr1:1413869-1416120 REVERSE LENGTH=447 | 201606	4	4	0.00074873	0.0962209	0.00085014	1	0.453686	0.171421	0.318875	0.339627	0.869473	2.10941	1	0.464092	0.563419	0.980377	1.07631	0.406248	0.934545	1	0.283159	0.922518	1.60996	2.40786	3.39371	1.12808
AT1G04990.1	44704	| Zinc finger C-x8-C-x5-C-x3-H type family protein | Chr1:1419368-1421454 REVERSE LENGTH=404 | 201606	2	2	0.0155367	0.00140047	0.00176558	1	0.887847	0.866903	0.891703	0.99196	0.862579	6.32042	1	0.921884	11.5113	0.838015	19.0962	0.806983	8.15048	1	0.965456	0.967021	0.948178	15.0953	0.869703	9.60752
AT1G04990.2	44704	| Zinc finger C-x8-C-x5-C-x3-H type family protein | Chr1:1419368-1421454 REVERSE LENGTH=404 | 201606	2	2	0.0155367	2.96226e-05	0.00176558	1	0.887847	0.866903	0.891703	0.99196	0.862579	6.32042	1	0.921884	0.846091	0.838015	19.0962	0.806983	8.15048	1	0.965456	0.967021	0.948178	15.0953	0.869703	9.60752
AT1G04990.6	44704	| Zinc finger C-x8-C-x5-C-x3-H type family protein | Chr1:1419368-1421454 REVERSE LENGTH=404 | 201606	2	2	0.0155367	2.96226e-05	0.0312368	1	0.887847	0.866903	0.891703	0.99196	0.862579	6.32042	1	0.921884	0.846091	0.838015	19.0962	0.806983	8.15048	1	0.965456	0.967021	0.948178	15.0953	6.53185	9.60752
AT1G05010.1	36677	| ethylene-forming enzyme | Chr1:1431419-1432695 REVERSE LENGTH=323 | 201606	21	20	0.0054306	2.38747e-05	0.134084	1	1.20228	0.714935	0.815494	1.13913	0.886288	1.39424	1	1.55828	1.10398	1.07734	2.11461	1.05429	1.61399	1	1.17358	1.26132	1.16519	1.35412	1.40749	1.21697
AT1G05140.1	47775	| Peptidase M50 family protein | Chr1:1482681-1484006 FORWARD LENGTH=441 | 201606	4	3	0.00493751	0.0540748	0.600552	1	2.01131	1.30357	0.495256	0.292505	0.458523	0.0682232	1	0.326729	0.170672	0.0432888	0.0426489	0.428633	0.0409639	1	1.15247	1.29475	0.401489	0.391798	0.37908	0.0554812
AT1G05150.1	90169	| Calcium-binding tetratricopeptide family protein | Chr1:1484280-1486706 REVERSE LENGTH=808 | 201606	13	5	2.61686e-06	0.00192586	0.0135436	1	3.07345	1.60411	1.54184	1.20474	3.73065	0.345317	1	1.0566	0.734081	1.39148	1.05554	1.86425	1.72115	1	1.66801	1.46567	2.47773	1.39828	2.52632	1.34697
AT1G05180.1	60035	| NAD(P)-binding Rossmann-fold superfamily protein | Chr1:1498357-1501775 REVERSE LENGTH=540 | 201606	11	11	0.00267761	0.0128845	0.030929	1	2.75879	1.63704	0.692875	1.10501	1.63102	0.21097	1	0.741005	1.79208	2.61426	2.47457	1.87068	2.15583	1	1.03373	1.95214	1.88934	1.48062	1.98553	0.990072
AT1G05190.1	24706	| Ribosomal protein L6 family | Chr1:1502515-1503738 REVERSE LENGTH=223 | 201606	28	28	4.427e-05	5.50801e-05	0.000308593	1	0.88313	0.949681	1.0256	0.945165	0.676467	1.09247	1	0.988322	0.911387	0.820112	0.633325	0.52915	0.479724	1	0.951902	0.694434	0.748434	0.75025	0.556296	0.721796
AT1G05260.1	34906	| Peroxidase superfamily protein | Chr1:1529827-1531271 FORWARD LENGTH=326 | 201606	2	2	0.00208958	0.0123583	0.018203	1	23.7433	14.6794	0.891703	3.91189	28.5492	12.3772	1	3.81568	16.9218	0.838015	8.31836	26.9476	18.5141	1	16.0351	29.0106	0.948178	12.2208	25.859	27.8495
AT1G05320.1	89451	| myosin heavy chain%2C embryonic smooth protein | Chr1:1554856-1557658 FORWARD LENGTH=790 | 201606	9	8	0.210649	0.0600882	0.0402245	1	0.746588	0.794056	0.445487	0.409863	1.00559	0.906188	1	0.919987	1.3561	1.41109	1.53769	2.0929	2.21664	1	1.06493	2.2801	1.68987	1.44778	1.65547	1.67513
AT1G05350.1	47020	| NAD(P)-binding Rossmann-fold superfamily protein | Chr1:1560891-1564005 REVERSE LENGTH=431 | 201606	9	9	0.582997	0.351519	0.33646	1	1.03506	0.650177	1.04411	0.892498	0.859132	0.904042	1	1.11746	0.981265	0.908339	0.985643	0.582694	0.62861	1	0.966744	0.389343	0.748102	0.659173	0.74851	0.866608
AT1G05385.1	22267	| photosystem II 11 kDa protein-like protein | Chr1:1582747-1583648 REVERSE LENGTH=199 | 201606	5	5	0.108996	0.0171098	0.215667	1	1.76735	2.09078	1.90382	1.41909	2.4701	2.70173	1	1.61924	2.00592	1.76826	1.02529	1.30594	1.18909	1	0.908855	0.654447	1.1353	1.02341	0.59771	0.640603
AT1G05500.1	62929	| Calcium-dependent lipid-binding (CaLB domain) family protein | Chr1:1625098-1628940 FORWARD LENGTH=560 | 201606	11	11	0.0547595	0.0530535	0.104132	1	1.10066	0.974514	0.633853	0.926823	0.962443	0.426977	1	1.10782	0.67504	1.12089	0.92646	1.6096	1.26475	1	0.877402	1.07423	0.500464	0.778963	0.915354	0.444633
AT1G05500.2	47046	| Calcium-dependent lipid-binding (CaLB domain) family protein | Chr1:1626281-1628940 FORWARD LENGTH=416 | 201606	10	10	9.29724e-07	2.79981e-06	1.02692e-07	1	0.887847	0.866903	35.7345	0.99196	54.2593	24.0715	1	0.921884	0.846091	56.1968	0.825627	80.6983	63.409	1	0.965456	0.967021	34.8905	0.903506	63.8151	30.9982
AT1G05520.1	86357	| Sec23/Sec24 protein transport family protein | Chr1:1631126-1635703 REVERSE LENGTH=783 | 201606	13	9	0.000315537	0.00888058	0.00234614	1	1.98784	1.60061	1.65101	0.837806	0.992993	0.486729	1	1.2382	1.54431	1.30557	1.92422	1.02346	0.837098	1	1.2291	0.819804	0.951435	0.524073	0.566761	0.572365
AT1G05560.1	52814	| UDP-glucosyltransferase 75B1 | Chr1:1645674-1647083 REVERSE LENGTH=469 | 201606	10	8	0.0374511	0.0182946	0.00272284	1	1.89141	1.85156	1.51266	1.69193	2.09461	0.0386542	1	0.755073	0.767555	1.13816	1.7951	2.26967	1.08799	1	0.436019	2.26963	1.46899	3.2958	1.91391	0.822296
AT1G05680.1	51051	| Uridine diphosphate glycosyltransferase 74E2 | Chr1:1703196-1704639 REVERSE LENGTH=453 | 201606	7	7	0.000126512	0.00653161	7.31344e-05	1	0.887847	0.866903	3.57523	9.9196	0.862579	0.903238	1	0.921884	16.6539	13.9461	34.4355	0.806983	0.793008	1	0.965456	31.1741	25.2978	36.1256	0.869703	0.928317
AT1G05960.1	108945	| ARM repeat superfamily protein | Chr1:1808478-1815060 REVERSE LENGTH=982 | 201606	2	2	0.300513	0.0339764	0.222906	1	0.887847	6.03597	0.891703	0.99196	3.54186	3.59736	1	0.921884	6.03499	8.38015	19.1647	11.1545	5.49657	1	1.67452	3.89809	3.86965	3.73139	2.91857	0.919041
AT1G06000.1	48122	| UDP-Glycosyltransferase superfamily protein | Chr1:1820495-1821802 REVERSE LENGTH=435 | 201606	12	12	0.00192774	0.00012621	8.58226e-05	1	0.799617	0.717478	0.604649	0.94301	0.520134	0.385462	1	0.759147	0.810511	0.498297	0.560505	0.516818	0.271387	1	0.791288	0.321635	0.528991	0.614026	0.418048	0.500484
AT1G06130.1	36625	| glyoxalase 2-4 | Chr1:1858034-1860640 REVERSE LENGTH=331 | 201606	11	10	0.0706217	8.80493e-05	0.00375296	1	0.963611	0.865873	1.13174	1.16526	1.64924	1.63799	1	1.41604	0.718839	1.22903	1.14884	1.4378	2.14347	1	0.815412	0.825511	1.37899	1.17674	1.93069	1.57067
AT1G06190.1	44530	| Rho termination factor | Chr1:1892467-1894078 REVERSE LENGTH=401 | 201606	6	6	0.00311104	0.0801675	0.650447	1	0.885056	0.540673	2.4391	1.24428	0.539613	1.69164	1	0.75667	0.503184	1.00278	0.425955	0.479436	0.471347	1	1.14647	1.13738	1.87251	1.25716	1.7268	1.64687
AT1G06190.2	32596	| Rho termination factor | Chr1:1892589-1894078 REVERSE LENGTH=292 | 201606	5	5	4.17049e-09	0.0180565	0.00260986	1	0.887847	0.866903	0.891703	33.2333	0.862579	0.903238	1	0.921884	0.846091	0.838015	23.8975	0.806983	0.793008	1	0.965456	0.967021	0.948178	21.2371	0.869703	0.928317
AT1G06190.3	33145	| Rho termination factor | Chr1:1892467-1893366 REVERSE LENGTH=299 | 201606	3	3	2.21298e-06	3.80043e-10	6.64287e-05	1	0.887847	14.4408	0.891703	0.99196	0.862579	0.903238	1	0.921884	28.2303	0.838015	0.825627	0.806983	0.793008	1	0.965456	19.2137	0.948178	0.903506	0.869703	0.928317
AT1G06210.1	42797	| ENTH/VHS/GAT family protein | Chr1:1897567-1898986 FORWARD LENGTH=383 | 201606	4	4	0.00809332	0.00106755	0.672782	1	1.1926	0.172303	0.746437	1.84483	1.01515	2.27033	1	1.02321	0.353212	0.253027	0.665717	1.22089	1.19321	1	1.35349	1.5396	1.37981	1.62478	0.722182	1.30353
AT1G06210.2	31381	| ENTH/VHS/GAT family protein | Chr1:1897567-1898494 FORWARD LENGTH=279 | 201606	3	3	2.08329e-05	1.83099e-06	6.15437e-05	1	0.887847	0.866903	0.891703	36.7078	20.1992	0.903238	1	0.921884	0.846091	0.838015	22.0482	40.4353	0.793008	1	0.965456	0.967021	0.948178	27.0091	12.005	0.928317
AT1G06220.1	110442	| Ribosomal protein S5/Elongation factor G/III/V family protein | Chr1:1900524-1904583 FORWARD LENGTH=987 | 201606	19	19	0.000356993	0.0486805	0.00460653	1	0.894535	0.816072	1.28887	1.11708	0.922339	0.28369	1	0.906184	1.00568	1.18239	1.01044	0.72358	0.49315	1	2.10793	1.48399	2.75939	1.92569	1.41061	1.61256
AT1G06290.1	75676	| acyl-CoA oxidase 3 | Chr1:1922423-1926002 FORWARD LENGTH=675 | 201606	25	24	5.31375e-06	0.0104383	0.0489312	1	1.14047	0.866798	0.76676	0.671367	0.551903	0.096687	1	0.548109	0.895014	0.938006	1.70321	0.883606	0.940654	1	1.09439	1.32654	1.84346	1.52375	1.99469	0.780679
AT1G06310.1	75900	| acyl-CoA oxidase 6 | Chr1:1926802-1930227 FORWARD LENGTH=675 | 201606	6	1	3.75516e-06	4.49809e-06	4.58663e-14	1	0.0266489	0.0260203	0.0267646	0.0297739	0.343239	0.0271109	1	0.0315466	0.0289529	0.0286766	0.0282527	1.65828	0.0271365	1	0.0580789	0.0581731	0.0570396	0.0543522	3.66231	0.0558448
AT1G06400.1	23927	| Ras-related small GTP-binding family protein | Chr1:1951089-1952686 REVERSE LENGTH=216 | 201606	9	4	0.000314608	0.0335951	0.285658	1	2.30211	1.11962	2.18065	1.56475	1.49848	0.0390385	1	0.622439	0.354411	0.904933	1.08913	1.0782	0.857314	1	1.15833	1.52999	1.71348	0.998723	1.65141	1.20449
AT1G06410.1	96688	| trehalose-phosphatase/synthase 7 | Chr1:1955413-1958153 FORWARD LENGTH=851 | 201606	23	21	0.000448913	0.548411	0.285376	1	1.66022	1.70988	1.28178	1.0911	1.12948	0.243201	1	1.02245	1.11154	0.921775	1.30835	0.774691	0.852841	1	1.19045	1.58838	1.32607	1.20072	1.23695	1.02234
AT1G06430.1	73198	| FTSH protease 8 | Chr1:1960214-1962525 REVERSE LENGTH=685 | 201606	62	22	0.00842684	0.00558808	0.512375	1	0.891154	0.757243	1.06605	1.08889	0.97568	1.05389	1	1.05587	0.779052	0.953403	0.812868	0.788202	0.807985	1	0.929194	0.892753	1.04635	0.894255	0.874328	0.986873
AT1G06460.1	31222	| alpha-crystallin domain 32.1 | Chr1:1967308-1969414 REVERSE LENGTH=285 | 201606	4	4	0.000234453	0.0459323	0.433163	1	2.37433	2.02353	2.07213	1.66385	2.5848	4.21486	1	2.42365	1.12138	2.51035	0.812144	2.13365	2.8823	1	0.968319	0.699665	0.94198	0.651254	1.50183	1.32797
AT1G06510.1	30808	| forkhead-associated domain protein | Chr1:1992389-1993583 FORWARD LENGTH=277 | 201606	6	6	0.238727	0.0973408	0.628835	1	0.887285	1.01056	1.04013	0.735567	0.431016	0.97925	1	0.422956	0.79007	0.915729	0.392725	0.440378	0.493627	1	1.3276	0.934569	0.952841	0.900751	0.861287	0.696248
AT1G06530.1	36119	| Tropomyosin-like protein | Chr1:2001625-2002596 FORWARD LENGTH=323 | 201606	17	17	0.0247453	0.110383	0.224404	1	1.0202	1.12653	1.29195	0.95234	1.22471	1.4745	1	0.954358	1.00509	1.20531	0.976079	1.25661	1.4311	1	0.848325	1.00882	1.06826	1.14902	1.16863	1.11102
AT1G06570.1	48816	| 4-hydroxyphenylpyruvate dioxygenase | Chr1:2012015-2013459 REVERSE LENGTH=445 | 201606	9	9	0.00103946	0.000326073	0.0402342	1	1.76592	1.72586	5.63614	1.34011	4.29323	1.50515	1	0.801221	0.741842	2.431	2.47673	1.82102	2.19247	1	1.83184	1.27491	2.53826	1.61884	2.62967	1.76029
AT1G06650.2	42020	| 2-oxoglutarate (2OG) and Fe(II)-dependent oxygenase superfamily protein | Chr1:2035909-2037186 FORWARD LENGTH=369 | 201606	13	12	0.000575726	0.0220416	0.000319205	1	0.755754	0.675141	0.955127	1.06406	1.11637	0.468538	1	0.704147	1.11747	1.07472	1.30383	0.907165	1.10939	1	0.805467	0.574123	1.04635	1.14769	1.30598	0.805338
AT1G06680.1	28095	| photosystem II subunit P-1 | Chr1:2047940-2049186 FORWARD LENGTH=263 | 201606	85	69	1.06758e-08	0.0112373	0.0157496	1	0.986102	0.99659	0.954468	0.941758	1.1686	1.46542	1	1.01745	0.899905	1.00025	0.686806	1.02698	0.97697	1	0.988974	1.04001	0.891501	0.864862	0.847769	0.997504
AT1G06690.1	41497	| NAD(P)-linked oxidoreductase superfamily protein | Chr1:2049742-2052039 REVERSE LENGTH=377 | 201606	26	26	2.95329e-05	0.00278101	0.00131888	1	1.3032	0.890886	1.25516	1.49654	1.28047	1.81751	1	1.1614	0.692336	0.919064	0.673336	1.10185	0.960406	1	1.40671	0.837036	0.957793	1.23217	0.871251	1.17199
AT1G06700.1	39820	| Protein kinase superfamily protein | Chr1:2052750-2054552 REVERSE LENGTH=361 | 201606	12	5	0.451271	0.252184	0.496316	1	1.24136	1.01027	0.950718	0.989498	1.11356	0.931342	1	1.30493	1.02045	1.19142	1.36783	1.14694	0.984832	1	1.27435	0.952029	1.30976	1.32	0.989942	1.25704
AT1G06820.1	65429	| carotenoid isomerase | Chr1:2093145-2096220 REVERSE LENGTH=595 | 201606	9	9	0.246258	0.0337687	0.0944883	1	0.961151	0.831132	0.666556	0.704829	0.605715	0.827336	1	0.856338	0.85212	0.527572	0.430825	0.70796	0.53241	1	0.833533	0.686192	0.643689	1.02611	0.790471	1.09853
AT1G06820.3	64612	| carotenoid isomerase | Chr1:2093265-2096220 REVERSE LENGTH=586 | 201606	11	11	3.28069e-09	3.0644e-16	1.5499e-11	1	0.0110946	0.0108328	0.0111428	0.0123956	0.0107788	0.0112869	1	0.0115798	0.0106277	0.0105263	0.0103707	0.0101365	0.00996097	1	0.0131809	0.0132023	0.0129451	0.0123352	0.0118737	0.0126739
AT1G06820.4	52771	| carotenoid isomerase | Chr1:2093145-2095856 REVERSE LENGTH=476 | 201606	8	8	2.02584e-07	3.53627e-10	1.16773e-06	1	0.887847	66.5117	53.3414	0.99196	0.862579	0.903238	1	0.921884	67.8386	42.0008	0.825627	0.806983	0.793008	1	0.965456	50.261	47.1479	0.903506	0.869703	0.928317
AT1G06950.1	112120	| translocon at the inner envelope membrane of chloroplasts 110 | Chr1:2130303-2135563 REVERSE LENGTH=1016 | 201606	85	85	3.96323e-06	8.86469e-06	4.4532e-06	1	0.90642	0.852138	0.972338	0.868972	0.653677	0.586404	1	1.01892	0.848352	0.810711	0.767503	0.633379	0.608481	1	0.988085	0.713583	0.758527	0.859657	0.560266	0.676359
AT1G07010.1	43732	| Calcineurin-like metallo-phosphoesterase superfamily protein | Chr1:2152949-2154968 FORWARD LENGTH=389 | 201606	2	2	0.000432355	0.0234453	0.0163173	1	1.75942	3.76065	4.74457	0.143282	0.124594	0.130467	1	2.40871	2.15965	6.94335	0.20461	0.19999	0.196526	1	2.60024	0.87383	1.68803	0.121832	0.117274	0.125178
AT1G07040.1	40638	| plant/protein | Chr1:2161225-2163035 REVERSE LENGTH=371 | 201606	11	11	0.0051962	6.04337e-05	3.63447e-06	1	1.5069	1.14164	1.64901	1.45307	2.0615	2.30088	1	1.9307	1.97869	2.09966	2.06938	2.90139	3.51114	1	1.93595	1.84595	2.91405	2.00484	3.05475	2.72511
AT1G07080.1	29698	| Thioredoxin superfamily protein | Chr1:2170069-2171861 FORWARD LENGTH=265 | 201606	6	6	0.0017598	0.442084	0.0211409	1	0.889409	0.778648	0.758191	0.784819	1.07528	1.67139	1	1.13452	0.898254	1.0891	1.14309	1.40731	1.56623	1	1.02321	1.08287	1.12369	1.69047	1.7993	1.73493
AT1G07110.1	82559	| fructose-2%2C6-bisphosphatase | Chr1:2178363-2183980 REVERSE LENGTH=744 | 201606	28	28	0.182027	0.000445096	0.0811439	1	0.692468	0.812482	0.90795	0.812028	0.655135	0.804158	1	0.738096	0.830133	0.66297	0.440241	0.565299	0.508696	1	0.580294	0.721539	0.66629	0.805786	0.548128	0.729377
AT1G07140.1	25601	| Pleckstrin homology (PH) domain superfamily protein | Chr1:2192360-2193688 REVERSE LENGTH=228 | 201606	12	9	0.00247963	0.00506681	0.0466868	1	2.55763	2.59885	2.37801	2.38919	2.29167	2.93311	1	1.79495	1.72206	1.58778	1.88515	1.66269	1.63624	1	1.43659	1.29923	1.34476	1.52748	1.56811	1.19664
AT1G07180.1	56628	| alternative NAD(P)H dehydrogenase 1 | Chr1:2204414-2206773 FORWARD LENGTH=510 | 201606	6	2	0.12364	0.000808591	2.19887e-05	1	0.887847	0.866903	0.891703	3.91189	9.07404	0.903238	1	0.921884	0.846091	0.838015	19.0962	29.5499	20.923	1	0.965456	0.967021	0.948178	12.0098	28.9717	6.76764
AT1G07240.1	52646	| UDP-glucosyl transferase 71C5 | Chr1:2223889-2225331 FORWARD LENGTH=480 | 201606	8	8	0.00436619	0.0148193	0.097714	1	3.86081	2.00536	2.66847	3.30032	4.02898	0.903238	1	4.52659	3.62765	4.84691	5.49341	7.71277	9.12037	1	1.44094	1.91314	1.86969	1.34396	1.73277	1.03585
AT1G07250.1	52844	| UDP-glucosyl transferase 71C4 | Chr1:2225963-2227402 FORWARD LENGTH=479 | 201606	10	10	0.540397	0.0683217	0.0116339	1	0.739672	0.771612	0.983743	1.09891	1.15143	0.952852	1	0.764804	0.651915	1.0982	1.16172	1.19563	1.21868	1	1.37382	1.57456	2.45976	1.81244	1.67402	1.94363
AT1G07320.1	30559	| ribosomal protein L4 | Chr1:2249190-2250189 FORWARD LENGTH=282 | 201606	19	19	0.000322745	0.000523444	0.000356146	1	1.14499	1.40195	1.53019	1.171	0.731304	2.00419	1	0.679978	0.958333	0.802414	0.480466	0.553358	0.487302	1	0.75526	0.626999	0.604107	0.526968	0.603142	1.08168
AT1G07320.2	30414	| ribosomal protein L4 | Chr1:2249190-2250189 FORWARD LENGTH=280 | 201606	18	18	1.10868e-07	1.56256e-06	5.63555e-06	1	1.14499	1.40195	1.53019	1.171	0.731304	0.0052254	1	0.679978	0.958333	0.802414	0.480466	0.553358	0.00340001	1	0.75526	0.626999	0.604107	0.526968	0.603142	0.005069
AT1G07360.1	53588	| CCCH-type zinc fingerfamily protein with RNA-binding domain-containing protein | Chr1:2260562-2262795 REVERSE LENGTH=481 | 201606	6	6	0.0606225	0.0469615	0.180644	1	0.126973	2.48361	2.11458	0.553831	1.30084	2.58349	1	0.133082	4.45272	3.6094	2.75672	3.1148	2.64188	1	0.071533	0.702385	0.932613	1.14157	2.15805	0.274855
AT1G07370.1	29122	| proliferating cellular nuclear antigen 1 | Chr1:2263204-2264382 FORWARD LENGTH=263 | 201606	8	2	0.00635034	0.0171325	0.0565929	1	0.987144	0.86966	0.590305	1.10842	0.578257	1.46171	1	1.11941	1.44453	0.801567	0.819279	0.768274	0.716805	1	1.34045	0.682361	0.627318	1.40654	0.872945	0.877032
AT1G07440.1	28332	| NAD(P)-binding Rossmann-fold superfamily protein | Chr1:2286436-2287665 REVERSE LENGTH=266 | 201606	9	9	0.0103371	4.28799e-05	0.677607	1	1.68888	1.12232	0.714285	1.18274	2.25171	1.17451	1	2.2596	3.10237	3.7033	2.39842	7.11734	5.03199	1	0.962549	1.1758	0.94709	1.42964	1.08117	1.31005
AT1G07510.1	89555	| FTSH protease 10 | Chr1:2305689-2309380 FORWARD LENGTH=813 | 201606	6	1	1.2026e-07	5.19074e-09	1.52386e-05	1	0.887847	28.9838	0.891703	0.99196	31.5262	0.903238	1	0.921884	33.9603	0.838015	0.825627	34.9269	0.793008	1	0.965456	31.1741	0.948178	0.903506	49.2574	0.928317
AT1G07660.1	11409	| Histone superfamily protein | Chr1:2369212-2369523 FORWARD LENGTH=103 | 201606	24	24	9.22726e-05	0.0474088	0.421709	1	1.31134	1.1976	0.971749	0.992269	1.06339	0.492538	1	0.875961	1.18076	0.829641	0.985218	1.15663	1.08754	1	0.982584	1.11028	1.0487	0.963766	1.23285	0.942672
AT1G07670.1	116180	| endomembrane-type CA-ATPase 4 | Chr1:2370305-2374196 REVERSE LENGTH=1061 | 201606	12	3	0.000782267	0.0169537	0.159343	1	1.075	0.803527	0.826547	0.775173	0.865826	0.0769315	1	0.494122	0.992218	0.490873	1.17424	0.69305	0.468131	1	1.78478	1.37857	1.45358	1.46442	1.32523	0.49949
AT1G07700.1	23011	| Thioredoxin superfamily protein | Chr1:2380214-2381127 FORWARD LENGTH=204 | 201606	7	7	4.7981e-05	0.01963	0.140775	1	0.738356	1.30035	1.63904	2.30399	1.59157	3.31422	1	1.62207	1.22256	1.21346	1.0306	1.86152	2.96438	1	1.63146	1.41159	3.17963	2.63451	3.36524	3.35598
AT1G07720.1	54335	| 3-ketoacyl-CoA synthase 3 | Chr1:2390970-2392406 REVERSE LENGTH=478 | 201606	1	1	1.33026e-05	0.0126621	6.5871e-06	1	0.665464	0.649765	0.668353	1.97007	1.06992	0.0677	1	0.363662	1.13432	0.58136	0.0825627	0.565019	0.0793008	1	0.965456	0.967021	0.368114	0.0903506	0.0869703	0.0928317
AT1G07750.1	38311	| RmlC-like cupins superfamily protein | Chr1:2404300-2405863 REVERSE LENGTH=356 | 201606	10	10	0.218738	0.00644269	0.048037	1	0.886108	0.742387	1.0129	1.1989	1.04787	1.54642	1	1.31076	0.716837	0.901574	0.968064	1.5586	2.15538	1	0.903026	0.6601	1.06495	0.843573	1.51665	1.33243
AT1G07770.1	14804	| ribosomal protein S15A | Chr1:2408413-2409065 REVERSE LENGTH=130 | 201606	19	8	0.00198953	0.000676896	0.869763	1	0.741002	0.838883	0.613818	0.620015	0.655273	0.262584	1	0.631981	1.07463	0.644023	0.829909	0.929907	0.702873	1	0.983732	0.96159	0.822632	0.949827	0.981571	0.776808
AT1G07780.1	29633	| phosphoribosylanthranilate isomerase 1 | Chr1:2410352-2411833 REVERSE LENGTH=275 | 201606	6	6	0.0242175	0.00308432	0.00140052	1	2.22193	2.05896	1.9031	1.36201	2.49146	2.72131	1	1.38541	1.4563	1.69733	1.30756	2.19658	2.64314	1	1.64553	1.03979	1.71126	1.90109	2.35016	2.32611
AT1G07780.11	23357	| phosphoribosylanthranilate isomerase 1 | Chr1:2410563-2411833 REVERSE LENGTH=213 | 201606	6	6	8.69963e-07	9.13981e-08	2.65731e-07	1	0.887847	54.7297	50.5868	0.99196	66.226	0.903238	1	0.921884	48.0345	55.9843	0.825627	72.4517	0.793008	1	0.965456	34.5917	56.9299	0.903506	78.1849	0.928317
AT1G07790.1	16402	| Histone superfamily protein | Chr1:2413049-2413495 FORWARD LENGTH=148 | 201606	12	1	3.04617e-07	3.56544e-09	2.11962e-10	1	0.887847	127.24	0.891703	0.99196	139.74	0.903238	1	0.921884	104.495	0.838015	0.825627	150.86	0.793008	1	0.965456	113.17	0.948178	0.903506	130.654	0.928317
AT1G07810.1	116366	| ER-type Ca2+-ATPase 1 | Chr1:2416681-2420572 FORWARD LENGTH=1061 | 201606	14	5	0.00217481	0.000706884	0.0610527	1	1.04027	0.916127	0.990507	0.868959	1.41916	0.164361	1	0.693138	1.07853	1.02679	1.8017	1.50967	1.22888	1	2.45433	2.1884	1.90556	1.8809	2.53294	1.42723
AT1G07890.1	27561	| ascorbate peroxidase 1 | Chr1:2438005-2439435 FORWARD LENGTH=250 | 201606	50	47	4.29645e-08	4.43991e-05	4.34528e-06	1	0.877447	0.905742	0.91109	0.829815	1.29951	1.44482	1	0.935254	1.2658	1.44099	1.48023	1.50033	1.62939	1	0.810415	1.32631	1.21771	1.43461	1.52231	1.45168
AT1G07890.6	27520	| ascorbate peroxidase 1 | Chr1:2438005-2439349 FORWARD LENGTH=249 | 201606	40	39	1.98007e-13	1.02286e-12	3.01444e-16	1	0.877447	0.00112738	0.00115964	0.829815	0.00112176	0.00117464	1	0.935254	0.00121727	0.00120565	1.48023	0.001161	0.0011409	1	0.810415	0.00116588	0.00114316	1.43461	0.00104855	0.00111922
AT1G07920.1	49502	| GTP binding Elongation factor Tu family protein | Chr1:2455559-2457001 FORWARD LENGTH=449 | 201606	81	81	2.41327e-06	0.0230729	0.00155549	1	0.981197	0.907282	0.817382	0.926031	0.765344	0.506932	1	1.00022	1.02216	0.849413	1.06903	0.849428	0.795507	1	1.00864	0.826217	0.960458	0.986917	1.05029	0.757073
AT1G07990.1	89589	| SIT4 phosphatase-associated family protein | Chr1:2477413-2482898 FORWARD LENGTH=802 | 201606	6	5	0.00359614	0.473405	0.0264663	1	2.2144	1.30575	1.05215	0.656016	1.57631	0.315466	1	1.38444	1.27489	0.945209	1.82919	1.82769	1.39035	1	1.69118	1.18188	1.29092	0.56339	1.95131	1.39475
AT1G07990.2	66064	| SIT4 phosphatase-associated family protein | Chr1:2477413-2481942 FORWARD LENGTH=588 | 201606	7	6	0.0154523	0.000176662	3.97697e-29	1	0.887847	0.866903	0.891703	0.99196	0.862579	6.30932	1	0.921884	0.846091	0.838015	0.825627	0.806983	36.8332	1	0.965456	0.967021	0.948178	0.903506	0.869703	37.1327
AT1G08050.1	70118	| Zinc finger (C3HC4-type RING finger) family protein | Chr1:2499088-2501311 REVERSE LENGTH=641 | 201606	6	6	0.000505685	8.26374e-10	7.29584e-06	1	0.887847	6.27457	0.891703	0.99196	17.1137	21.0781	1	0.921884	33.9603	3.40456	82.6312	3.22662	5.54155	1	0.965456	9.47985	28.5563	54.3211	61.0671	12.4027
AT1G08110.1	20848	| lactoylglutathione lyase family protein / glyoxalase I family protein | Chr1:2535702-2537630 FORWARD LENGTH=185 | 201606	17	17	0.0712093	0.0274921	0.194797	1	1.25679	0.812592	0.967662	1.46447	1.22256	1.44787	1	1.06869	0.594342	0.993844	0.79779	1.07201	0.995659	1	0.961215	0.764768	1.23597	1.11351	0.865263	1.19475
AT1G08110.4	26472	| lactoylglutathione lyase family protein / glyoxalase I family protein | Chr1:2535463-2537630 FORWARD LENGTH=235 | 201606	17	17	4.58452e-06	1.01627e-07	4.89767e-06	1	1.25679	0.00786811	0.00809319	1.46447	1.22256	1.44787	1	1.06869	0.00592224	0.00586571	0.79779	1.07201	0.995659	1	0.961215	0.00761476	0.00746638	1.11351	0.865263	1.19475
AT1G08160.1	25158	| Late embryogenesis abundant (LEA) hydroxyproline-rich glycoprotein family | Chr1:2559672-2560337 REVERSE LENGTH=221 | 201606	4	4	0.000139567	0.0878052	0.380122	1	1.44259	3.67497	1.73651	0.980948	3.08118	0.0882771	1	0.378373	2.50545	1.36929	1.07514	3.75974	2.10899	1	1.29433	0.777344	0.632119	1.36267	1.73261	0.620536
AT1G08200.1	43790	| UDP-D-apiose/UDP-D-xylose synthase 2 | Chr1:2574259-2576609 REVERSE LENGTH=389 | 201606	25	9	0.0803779	9.1655e-05	2.61305e-05	1	0.927072	0.915841	0.838191	0.95928	0.658516	0.830541	1	0.805026	0.83442	0.820156	0.689544	0.643333	0.520268	1	0.67215	0.752537	0.666198	0.698406	0.513905	0.564749
AT1G08250.1	44802	| arogenate dehydratase 6 | Chr1:2588994-2590235 REVERSE LENGTH=413 | 201606	8	4	0.173343	0.078212	0.0819457	1	0.93611	0.576002	0.739612	0.937555	0.484388	0.502258	1	1.22288	1.12585	1.24934	1.62732	0.936185	1.17893	1	0.732873	0.961348	0.568309	0.686652	0.556996	0.555909
AT1G08360.1	24469	| Ribosomal protein L1p/L10e family | Chr1:2636231-2637694 FORWARD LENGTH=216 | 201606	19	7	0.00292635	0.167513	0.809228	1	0.802184	1.03303	0.909342	0.923953	0.730811	0.476246	1	1.02898	1.42302	1.07204	1.09595	0.959371	0.980337	1	0.905171	1.10424	1.15232	1.19885	1.06211	0.930127
AT1G08380.1	15144	| photosystem I subunit O | Chr1:2641004-2641739 REVERSE LENGTH=140 | 201606	4	4	1.04033e-05	0.000170175	0.000153183	1	0.543319	0.396056	0.445229	0.382241	0.260484	0.132205	1	0.607226	0.42529	0.49657	0.412289	0.315162	0.229966	1	1.08407	0.876867	0.9501	0.368881	0.441097	0.599211
AT1G08420.1	108580	| BRI1 suppressor 1 (BSU1)-like 2 | Chr1:2649959-2656564 FORWARD LENGTH=1018 | 201606	30	8	0.271374	0.411849	0.163284	1	1.2788	0.918402	1.22877	1.16214	1.166	0.874834	1	0.854926	1.02436	1.33626	1.32473	1.1504	1.15233	1	1.57174	1.54669	1.53795	1.13639	1.21392	1.43458
AT1G08450.1	49844	| calreticulin 3 | Chr1:2668008-2671800 REVERSE LENGTH=424 | 201606	29	29	3.36578e-09	1.50291e-05	1.76031e-06	1	1.0882	1.67893	1.61717	1.52898	2.19712	3.27831	1	1.59699	2.929	2.99497	3.30785	2.62307	3.15775	1	1.29651	1.3336	2.17721	2.09473	3.30714	2.61168
AT1G08470.1	44037	| strictosidine synthase-like 3 | Chr1:2682262-2683977 REVERSE LENGTH=390 | 201606	4	4	0.000846952	0.00979963	4.45075e-05	1	1.03723	1.01443	0.817073	0.659467	0.581257	0.0226245	1	0.360817	0.717338	0.449871	0.251506	0.623195	0.426133	1	0.457515	0.704989	0.452947	0.382031	0.100081	0.151812
AT1G08480.1	15813	| succinate dehydrogenase subunit | Chr1:2684340-2685395 FORWARD LENGTH=142 | 201606	11	11	0.00348529	8.99042e-05	0.0858014	1	1.46177	1.02128	0.83731	0.872156	1.5817	0.639194	1	0.771553	0.839892	1.30059	1.34807	2.15052	1.9798	1	0.785696	1.4931	1.25642	1.54914	1.86296	1.81058
AT1G08490.1	50485	| chloroplastic NIFS-like cysteine desulfurase | Chr1:2685980-2688547 REVERSE LENGTH=463 | 201606	14	14	0.0637929	0.0137369	0.0188315	1	1.31574	0.945126	0.892239	1.07554	1.24024	1.10112	1	1.57884	0.723285	0.889552	1.19603	1.50859	1.40844	1	1.47515	0.773473	1.17651	1.42455	1.45472	1.10639
AT1G08520.1	83284	| ALBINA 1 | Chr1:2696538-2700819 FORWARD LENGTH=760 | 201606	24	24	0.000517972	5.3526e-08	0.0253414	1	0.989956	0.941731	1.25638	1.17565	0.237745	1.08857	1	0.720849	0.619916	0.598854	0.259938	0.210714	0.158492	1	1.17758	0.592941	1.09417	0.347757	0.561464	1.0641
AT1G08550.1	52017	| non-photochemical quenching 1 | Chr1:2707462-2709387 FORWARD LENGTH=462 | 201606	21	21	0.000408748	0.00374545	0.603465	1	1.11159	0.960407	1.03585	1.30913	1.46264	1.61618	1	1.31961	0.812017	1.41528	1.14373	1.16764	1.51835	1	1.13067	1.11424	1.09666	0.826753	1.10021	1.15424
AT1G08640.1	32902	| Chloroplast J-like domain 1 | Chr1:2748714-2751209 REVERSE LENGTH=294 | 201606	8	8	0.00975778	0.0408096	0.0894053	1	1.15432	0.653814	0.672224	0.943646	0.724083	0.155039	1	0.591464	0.574391	0.432701	0.517577	0.523985	0.310185	1	0.916287	0.763686	0.897998	0.598281	0.740873	0.395179
AT1G08780.1	14881	| ABI3-interacting protein 3 | Chr1:2809925-2811126 REVERSE LENGTH=129 | 201606	3	3	0.00308558	4.34063e-05	3.42362e-06	1	0.887847	8.66903	0.891703	0.99196	17.5567	21.0582	1	0.921884	11.3085	0.838015	0.825627	8.06983	13.2879	1	0.965456	3.66662	0.948178	0.903506	11.6771	18.5663
AT1G08820.1	43270	| vamp/synaptobrevin-associated protein 27-2 | Chr1:2821810-2824412 REVERSE LENGTH=386 | 201606	2	2	2.00021e-05	0.0935386	0.00403442	1	1.54397	5.77925	0.222503	2.47519	5.71423	0.904854	1	12.4342	36.1554	0.838015	18.7279	14.2024	18.5641	1	0.912695	4.32317	0.128566	4.07863	1.59676	2.10074
AT1G08830.1	15098	| copper/zinc superoxide dismutase 1 | Chr1:2827700-2829053 FORWARD LENGTH=152 | 201606	9	7	0.00313446	4.01364e-05	0.339633	1	0.958088	0.601013	1.26498	1.2906	0.789645	1.28082	1	1.19222	0.96885	1.47227	1.54389	0.90991	1.11028	1	1.09133	1.16152	1.35937	0.903679	0.925707	1.39157
AT1G08880.1	14813	| Histone superfamily protein | Chr1:2847144-2847676 REVERSE LENGTH=142 | 201606	8	4	0.0760872	0.0658202	0.761521	1	1.67275	1.19384	0.729329	0.922576	0.804745	0.792057	1	0.894523	0.738508	0.810231	0.424201	0.973247	1.22725	1	0.855737	0.939036	0.889033	0.585833	1.07262	1.04044
AT1G08970.1	25640	| nuclear factor Y%2C subunit C9 | Chr1:2883144-2883839 FORWARD LENGTH=231 | 201606	3	2	0.12734	0.000393023	0.118106	1	1.50987	0.368564	0.639396	0.299261	0.739313	0.638547	1	0.735048	0.242757	0.0181768	0.0768711	0.294836	0.288374	1	0.615089	0.369908	0.146973	0.339094	0.54842	0.814527
AT1G08980.1	45056	| amidase 1 | Chr1:2884455-2886430 FORWARD LENGTH=425 | 201606	11	11	0.430395	0.278943	0.0625716	1	0.917503	0.895152	0.859931	1.15395	0.75233	0.814573	1	0.960674	0.739607	0.758908	0.779558	0.681351	0.695831	1	1.0305	1.26351	1.03892	0.702443	0.533074	0.933308
AT1G09010.1	107661	| glycoside hydrolase family 2 protein | Chr1:2895259-2899287 REVERSE LENGTH=944 | 201606	24	24	0.000118146	6.78317e-07	1.85614e-06	1	1.58811	1.8086	2.13255	1.80865	2.77338	1.84623	1	1.20853	1.14294	1.65757	1.53346	2.07072	2.64156	1	1.93541	2.02983	2.46177	2.05893	3.80163	2.79116
AT1G09020.1	53466	| sucrose nonfermenting-like protein | Chr1:2900149-2904212 REVERSE LENGTH=487 | 201606	5	5	0.0334257	0.0625209	0.945651	1	0.358472	1.44124	1.18043	1.66385	0.60706	0.630932	1	0.217127	1.85294	1.3367	0.815542	0.655812	0.794234	1	0.983928	1.18276	0.937338	1.35913	0.874345	0.925215
AT1G09070.1	34189	| soybean gene regulated by cold-2 | Chr1:2927767-2928741 FORWARD LENGTH=324 | 201606	6	6	0.00354337	0.0415789	0.000423636	1	3.38161	5.35804	2.96341	0.55945	5.73382	5.16874	1	1.08559	2.58084	1.42032	1.6617	2.18781	2.29244	1	3.14286	3.35703	3.08863	4.13507	8.22524	4.83824
AT1G09080.1	75150	| Heat shock protein 70 (Hsp 70) family protein | Chr1:2929268-2931804 REVERSE LENGTH=675 | 201606	11	7	1.27193e-08	0.000122206	3.2581e-05	1	1.1872	1.84787	1.50215	0.992769	3.56326	5.87152	1	1.05549	3.61007	3.45011	3.66173	2.98486	3.3873	1	3.2582	4.23673	5.03773	6.79883	8.4598	5.53026
AT1G09100.1	47038	| 26S proteasome AAA-ATPase subunit RPT5B | Chr1:2936675-2939258 REVERSE LENGTH=423 | 201606	19	4	1.34967e-06	2.57648e-05	8.02926e-05	1	141.965	118.543	139.53	135.4	125.8	189.759	1	131.852	169.114	171.092	233.628	172.286	213.881	1	167.447	203.581	174.152	204.742	182.383	216.666
AT1G09130.1	36307	| ATP-dependent caseinolytic (Clp) protease/crotonase family protein | Chr1:2940063-2942217 REVERSE LENGTH=330 | 201606	15	15	0.148621	0.164846	0.461165	1	0.768782	0.832601	0.806296	0.931284	0.893025	0.920557	1	0.675369	0.782601	0.702098	0.664601	0.783707	0.813199	1	0.855776	0.806606	0.841328	0.860308	0.870066	0.76408
AT1G09150.1	20457	| pseudouridine synthase and archaeosine transglycosylase (PUA) domain-containing protein | Chr1:2946599-2948908 FORWARD LENGTH=181 | 201606	4	4	0.0879232	0.0199517	0.0158094	1	0.623385	0.368564	0.0379108	0.693889	0.366726	0.638547	1	0.56808	0.632716	0.217374	0.421643	0.122169	0.49192	1	1.35698	1.37668	0.399984	0.543522	0.873088	0.746107
AT1G09200.1	15268	| Histone superfamily protein | Chr1:2971722-2972132 REVERSE LENGTH=136 | 201606	13	2	0.0456414	0.0823266	0.0206066	1	1.07423	1.23304	1.5224	1.20053	1.44689	0.718375	1	0.692079	1.30526	0.873402	1.08944	1.51031	1.65316	1	1.592	1.80205	1.5119	1.8572	2.8244	1.68912
AT1G09210.1	48157	| calreticulin 1b | Chr1:2973217-2976655 REVERSE LENGTH=424 | 201606	8	8	1.91932e-05	0.50161	0.000237353	1	0.887847	0.866903	0.891703	0.99196	0.862579	0.903238	1	0.921884	0.846091	0.838015	0.825627	0.806983	3.22652	1	0.965456	0.967021	0.948178	0.903506	14.4582	55.8375
AT1G09270.1	59446	| importin alpha isoform 4 | Chr1:2994506-2997833 FORWARD LENGTH=538 | 201606	13	11	0.203497	0.149556	0.618992	1	1.12313	0.709871	0.793796	1.1104	1.12463	1.2784	1	1.33325	1.08382	1.2461	1.68707	1.03443	1.08045	1	1.29812	0.99428	1.01453	1.02865	0.865841	1.28341
AT1G09300.1	54982	| Metallopeptidase M24 family protein | Chr1:3003981-3008131 FORWARD LENGTH=493 | 201606	4	4	0.00798761	0.0244543	0.206246	1	1.1875	0.606149	1.49468	2.30399	2.00613	1.50391	1	1.2206	1.97694	2.79922	2.44005	2.67709	2.90981	1	2.60806	1.72554	2.14766	2.83778	3.13576	2.08685
AT1G09310.1	19947	| plant/protein (Protein of unknown function%2C DUF538) | Chr1:3009109-3009648 FORWARD LENGTH=179 | 201606	25	24	0.0002953	1.78478e-07	7.62482e-08	1	1.07205	1.15482	1.11889	0.869623	0.658823	1.02504	1	0.793342	0.770956	0.767914	0.445812	0.515123	0.486101	1	0.71463	0.787763	0.579224	0.652502	0.25396	0.46731
AT1G09330.1	21238	| golgi apparatus membrane protein-like protein ECHIDNA protein | Chr1:3013003-3014903 REVERSE LENGTH=186 | 201606	4	4	0.305977	0.126269	0.275672	1	0.637813	0.620316	0.510315	0.562707	1.11701	0.517146	1	0.401101	0.861654	0.724868	0.820786	1.40444	0.574588	1	0.778349	1.3104	1.89716	1.46509	2.4355	0.748286
AT1G09340.1	42620	| chloroplast RNA binding protein | Chr1:3015473-3018035 FORWARD LENGTH=378 | 201606	86	86	0.0459596	1.7282e-05	0.00225052	1	0.911004	0.99348	1.09041	1.0626	1.10413	0.990446	1	1.2823	1.02976	1.04878	0.925607	1.0558	0.913896	1	1.0686	0.989545	0.982251	0.916318	0.828316	0.870278
AT1G09430.1	46946	| ATP-citrate lyase A-3 | Chr1:3042135-3044978 FORWARD LENGTH=424 | 201606	23	18	0.032083	0.0422862	0.492947	1	0.906709	0.785602	0.712102	0.8875	0.728506	0.75466	1	1.0761	1.03119	0.946858	1.02605	0.754806	0.946254	1	1.25595	1.21177	1.08823	1.07022	1.13037	1.11483
AT1G09480.1	41278	| NAD(P)-binding Rossmann-fold superfamily protein | Chr1:3057975-3060661 FORWARD LENGTH=369 | 201606	4	2	0.00189366	7.86046e-07	0.00473716	1	0.887847	0.866903	0.891703	0.99196	20.258	9.36389	1	0.921884	0.846091	0.838015	0.825627	21.4757	23.9219	1	0.965456	0.967021	0.948178	0.903506	28.8391	15.4468
AT1G09490.1	35622	| NAD(P)-binding Rossmann-fold superfamily protein | Chr1:3064172-3065815 FORWARD LENGTH=322 | 201606	9	7	0.00480917	0.48269	0.255015	1	0.799849	0.694057	0.853068	0.693149	0.866001	0.362278	1	1.04559	0.950639	1.00213	1.17834	1.16636	1.24614	1	0.857033	0.957223	1.3681	1.35588	1.0596	0.877117
AT1G09490.2	32397	| NAD(P)-binding Rossmann-fold superfamily protein | Chr1:3064680-3065815 FORWARD LENGTH=291 | 201606	10	10	4.5226e-08	1.24954e-09	6.47312e-08	1	0.887847	0.866903	56.711	0.99196	0.862579	0.903238	1	0.921884	0.846091	53.2326	0.825627	0.806983	0.793008	1	0.965456	0.967021	81.9667	0.903506	0.869703	0.928317
AT1G09500.1	35773	| NAD(P)-binding Rossmann-fold superfamily protein | Chr1:3066811-3068484 FORWARD LENGTH=325 | 201606	8	6	0.485929	2.73949e-12	1.97346e-07	1	0.887847	0.866903	0.891703	0.99196	3.41777	0.903238	1	0.921884	0.846091	0.838015	52.1898	13.4059	0.793008	1	0.965456	0.967021	0.948178	36.0441	72.3242	0.928317
AT1G09560.1	22868	| germin-like protein 5 | Chr1:3093896-3094639 FORWARD LENGTH=219 | 201606	5	3	0.651199	2.20131e-05	1.33456e-07	1	2.54961	0.863219	2.01624	2.49413	1.6542	2.59462	1	1.51931	0.0846091	3.09439	6.00093	2.69023	7.12208	1	19.2511	19.4672	56.5513	42.282	153.611	71.192
AT1G09590.1	18653	| Translation protein SH3-like family protein | Chr1:3106549-3107606 FORWARD LENGTH=164 | 201606	20	20	5.24597e-05	0.0435957	0.026934	1	0.988748	1.07039	1.05471	0.931138	0.654696	0.389234	1	0.899139	1.06664	0.815501	1.01543	0.82853	0.647042	1	1.13193	0.934477	0.814799	0.949761	0.955951	0.711496
AT1G09620.1	123451	| ATP binding/leucine-tRNA ligases/aminoacyl-tRNA ligase | Chr1:3113077-3116455 REVERSE LENGTH=1091 | 201606	55	55	8.56029e-05	2.40508e-06	0.000112242	1	1.23604	1.17178	1.09201	1.12012	0.72346	0.4122	1	0.995606	0.801393	0.824228	0.893896	0.595859	0.547848	1	1.27743	0.99362	0.95093	0.915859	0.736658	0.66245
AT1G09630.1	24108	| RAB GTPase 11C | Chr1:3118350-3119571 REVERSE LENGTH=217 | 201606	10	4	0.164759	0.0264136	0.100157	1	0.967343	1.44238	1.42378	1.05633	0.727401	0.377749	1	0.619922	0.710247	1.0567	1.6897	1.28581	0.867336	1	1.92984	2.21161	2.19263	1.31344	2.12054	1.03076
AT1G09640.1	46661	| Translation elongation factor EF1B%2C gamma chain | Chr1:3120162-3122152 FORWARD LENGTH=414 | 201606	43	26	3.24018e-07	0.00138474	0.0499119	1	0.906611	1.08567	0.872249	0.894084	0.801933	0.426319	1	0.773976	0.943771	0.856072	1.0998	0.791624	0.727095	1	1.06698	1.21278	1.05339	1.16287	1.0547	0.842912
AT1G09740.1	18150	| Adenine nucleotide alpha hydrolases-like superfamily protein | Chr1:3154603-3155834 FORWARD LENGTH=171 | 201606	4	4	0.0127144	0.000282607	0.000220029	1	0.887847	11.5946	12.0427	0.99196	19.9528	21.1102	1	0.921884	6.00301	16.8978	21.3116	21.4757	39.6187	1	0.965456	10.4009	28.0734	36.1548	52.4254	27.8665
AT1G09750.1	47661	| Eukaryotic aspartyl protease family protein | Chr1:3157541-3158960 FORWARD LENGTH=449 | 201606	13	13	0.0011874	9.17402e-07	0.100416	1	1.80773	1.03877	1.38744	1.25256	0.64334	1.49355	1	1.3858	0.944046	0.83838	0.655809	0.442359	0.339249	1	1.28661	0.932845	1.0078	0.875096	0.697642	1.36366
AT1G09760.1	28041	| U2 small nuclear ribonucleoprotein A | Chr1:3159476-3161603 REVERSE LENGTH=249 | 201606	7	7	0.395269	0.330342	0.366771	1	2.27831	1.35367	1.64084	1.84262	1.10146	1.67694	1	0.662722	0.66707	0.787423	0.762136	0.697211	0.91029	1	0.897423	0.700976	0.877773	0.584863	0.621401	0.730524
AT1G09770.1	95767	| cell division cycle 5 | Chr1:3162002-3165122 FORWARD LENGTH=844 | 201606	12	12	0.167387	0.0598635	0.0155949	1	2.10996	1.9568	1.89705	1.97766	2.04534	2.7175	1	1.62399	2.66446	2.1447	1.60946	1.83113	1.63011	1	2.04328	2.38399	3.28634	2.47522	2.48959	2.78268
AT1G09780.1	60580	| Phosphoglycerate mutase%2C 2%2C3-bisphosphoglycerate-independent | Chr1:3165550-3167812 REVERSE LENGTH=557 | 201606	53	27	0.0403041	3.57698e-06	0.00375377	1	1.07641	1.27097	1.2179	1.12377	0.980539	1.14985	1	1.05673	1.38837	1.25947	1.43542	0.840566	0.964883	1	1.05978	0.985255	1.25925	1.09521	1.03526	0.876696
AT1G09795.1	44756	| ATP phosphoribosyl transferase 2 | Chr1:3173588-3176690 FORWARD LENGTH=413 | 201606	20	17	0.00276615	0.00173267	0.00756574	1	0.991405	0.968682	1.11529	0.797245	0.547437	0.764362	1	0.689189	0.698099	0.637358	0.498906	0.473309	0.362207	1	0.72633	0.563789	0.671293	0.875008	0.413576	0.486699
AT1G09830.1	56473	| Glycinamide ribonucleotide (GAR) synthetase | Chr1:3192783-3194936 REVERSE LENGTH=532 | 201606	15	15	0.106709	0.17703	0.764686	1	0.837913	1.05381	1.18067	0.907682	1.02575	1.04976	1	0.737269	1.21276	1.07802	0.907298	1.13038	1.29077	1	0.965528	1.11843	1.05605	1.17059	1.03098	1.05259
AT1G09850.1	48073	| xylem bark cysteine peptidase 3 | Chr1:3201848-3203875 FORWARD LENGTH=437 | 201606	9	9	0.112046	0.0236688	0.00126879	1	1.02002	1.06739	1.15616	1.05498	1.72077	1.66543	1	0.856741	1.06976	1.16973	0.857823	1.66375	2.20011	1	1.04202	1.31514	1.09516	1.1104	2.54598	1.71769
AT1G09870.1	54855	| histidine acid phosphatase family protein | Chr1:3205817-3208444 FORWARD LENGTH=487 | 201606	10	10	0.025996	0.0324267	0.0310892	1	0.615998	0.736788	1.16839	0.526512	0.791578	1.53062	1	0.162872	1.30422	1.50989	1.18659	1.72487	1.82636	1	1.16136	1.35241	1.72349	1.99196	1.57025	2.70155
AT1G10140.1	18374	| Uncharacterized conserved protein UCP031279 | Chr1:3322970-3323473 REVERSE LENGTH=167 | 201606	3	3	3.32408e-20	0.000487191	0.000184051	1	0.887847	0.866903	0.891703	0.99196	8.62579	0.903238	1	0.921884	8.46091	11.0943	16.0758	8.06983	7.93008	1	0.965456	6.48029	18.9636	12.0098	14.414	6.51718
AT1G10200.1	21040	| GATA type zinc finger transcription factor family protein | Chr1:3346677-3347763 REVERSE LENGTH=190 | 201606	12	12	0.0132793	0.00854438	0.296662	1	2.1007	2.66655	2.49446	1.33551	1.87423	2.61995	1	1.64031	2.55476	2.82637	1.01096	1.71212	2.13708	1	1.39567	1.34653	1.48003	0.625193	0.875243	1.33988
AT1G10210.1	42644	| mitogen-activated protein kinase 1 | Chr1:3349579-3350776 FORWARD LENGTH=370 | 201606	4	1	0.027819	3.28532e-06	0.00013495	1	0.887847	3.42843	17.5788	0.99196	0.862579	0.903238	1	0.921884	11.3432	25.0404	0.825627	0.806983	0.793008	1	0.965456	21.9219	6.51391	0.903506	0.869703	0.928317
AT1G10290.1	99166	| dynamin-like protein 6 | Chr1:3370774-3377120 FORWARD LENGTH=914 | 201606	29	10	0.317922	0.304574	0.204347	1	1.01697	0.74863	0.877219	1.05209	0.868324	0.815948	1	1.21202	0.923988	1.0366	1.12495	0.996302	0.977176	1	1.14106	0.823318	0.892827	0.770102	0.948442	0.912427
AT1G10310.1	25318	| NAD(P)-binding Rossmann-fold superfamily protein | Chr1:3381733-3383874 REVERSE LENGTH=242 | 201606	7	7	0.692433	0.49576	0.414624	1	1.04256	0.723887	1.26397	0.986206	1.30076	1.05372	1	0.671962	0.796091	0.610882	0.64446	0.819843	0.691553	1	0.695499	0.789334	0.583948	0.647084	0.67123	0.61686
AT1G10360.1	25911	| glutathione S-transferase TAU 18 | Chr1:3395738-3396806 REVERSE LENGTH=227 | 201606	3	3	0.178437	5.0307e-05	0.932808	1	1.1685	2.27346	0.877438	0.688769	0.879321	0.0888789	1	1.66116	6.66632	2.2009	1.45443	0.847415	1.45539	1	0.722903	0.724075	0.752247	0.899259	0.680225	0.506739
AT1G10370.1	25307	| Glutathione S-transferase family protein | Chr1:3397274-3398273 REVERSE LENGTH=227 | 201606	14	14	0.00221728	0.0357878	0.00865506	1	1.11408	1.24338	1.2541	0.889969	0.792406	0.739593	1	1.04214	0.849116	0.949495	0.866089	0.685867	0.696253	1	0.755832	0.993594	0.816213	1.19515	0.564023	0.575394
AT1G10430.1	34934	| protein phosphatase 2A-2 | Chr1:3428705-3430437 REVERSE LENGTH=306 | 201606	8	2	0.000105237	0.00196034	0.00583561	1	1.49978	0.0258614	1.77032	2.1532	1.62277	0.98829	1	0.802477	0.0170078	1.1206	1.34591	1.40335	0.846735	1	1.23901	0.0206929	0.944757	1.15971	1.1074	1.19177
AT1G10500.1	19337	| chloroplast-localized ISCA-like protein | Chr1:3460160-3461340 REVERSE LENGTH=180 | 201606	2	2	6.7091e-05	4.64931e-07	0.000133298	1	0.0380368	0.0371395	0.038202	0.0424972	0.0369543	0.646207	1	0.0558991	0.0513034	0.0508136	0.0500625	0.048932	0.480846	1	0.0721738	0.0722908	0.0708822	0.0675426	0.0650157	0.927176
AT1G10510.1	64722	| RNI-like superfamily protein | Chr1:3461771-3465590 FORWARD LENGTH=605 | 201606	18	18	0.00118132	0.0198413	0.0447614	1	1.48643	1.34651	1.35736	1.14925	0.841287	0.605679	1	0.858986	0.845855	0.781582	0.68496	0.621353	0.701264	1	0.943946	0.738083	0.776964	0.800795	0.629581	0.717518
AT1G10580.1	65128	| Transducin/WD40 repeat-like superfamily protein | Chr1:3491560-3493665 REVERSE LENGTH=573 | 201606	3	3	0.40902	0.286892	0.232086	1	0.878269	0.865141	1.54613	1.24149	1.95362	1.79759	1	0.346213	0.534238	0.741693	0.504125	0.405728	0.689162	1	1.13571	0.936537	1.29399	0.706386	1.02567	1.82151
AT1G10590.1	15455	| Nucleic acid-binding%2C OB-fold-like protein | Chr1:3502324-3502991 REVERSE LENGTH=139 | 201606	6	5	0.420944	0.164433	0.283928	1	0.779131	0.808863	0.892499	0.869429	0.435664	0.962086	1	0.778772	0.942273	0.844201	0.950741	0.470918	0.627581	1	0.964646	0.64303	0.893206	1.25749	1.16357	0.877442
AT1G10630.1	20623	| ADP-ribosylation factor A1F | Chr1:3513189-3514230 REVERSE LENGTH=181 | 201606	20	1	0.00309707	0.344011	0.455906	1	1.34263	1.32536	0.814406	1.05378	1.17249	0.757567	1	1.13663	1.14996	1.28676	1.18722	1.39991	1.1164	1	0.804209	0.961977	0.905622	0.995753	1.22054	0.772572
AT1G10670.1	46679	| ATP-citrate lyase A-1 | Chr1:3535787-3538098 FORWARD LENGTH=423 | 201606	14	7	0.000135017	0.000471877	5.11945e-05	1	0.923053	0.847104	0.754033	0.948325	0.355492	0.489964	1	0.851151	0.734448	0.713377	0.682937	0.528655	0.520677	1	1.03159	0.72274	0.681731	0.633349	0.421542	0.526393
AT1G10670.3	49049	| ATP-citrate lyase A-1 | Chr1:3535787-3538098 FORWARD LENGTH=443 | 201606	10	5	9.2343e-09	1.17633e-08	2.06929e-10	1	0.887847	0.866903	115.799	0.99196	54.5938	75.245	1	0.921884	0.846091	123.126	0.825627	91.2433	89.8665	1	0.965456	0.967021	136.154	0.903506	84.1893	105.13
AT1G10700.1	44697	| phosphoribosyl pyrophosphate (PRPP) synthase 3 | Chr1:3554157-3556274 FORWARD LENGTH=411 | 201606	5	5	0.00303931	0.0106172	0.267717	1	0.29165	0.643133	0.220945	0.565177	0.150416	0.0223803	1	0.831619	0.614615	0.30305	1.04699	0.155345	0.365757	1	0.865636	0.289916	0.939338	0.547071	0.866921	0.927585
AT1G10760.1	156581	| Pyruvate phosphate dikinase%2C PEP/pyruvate binding domain-containing protein | Chr1:3581210-3590043 REVERSE LENGTH=1399 | 201606	68	68	0.00013499	0.00649197	0.0352353	1	1.00689	1.09353	1.27428	1.25598	1.52217	0.74358	1	0.668871	0.84121	0.887727	0.689217	1.0784	0.846087	1	0.767257	0.83993	0.756071	0.717893	0.637704	0.680831
AT1G10830.1	40851	| 15-cis-zeta-carotene isomerase | Chr1:3605736-3607449 REVERSE LENGTH=367 | 201606	2	2	0.470062	0.530325	0.263646	1	0.911744	0.463448	0.445851	0.499663	0.177093	0.181315	1	0.907962	0.815701	0.456147	0.114792	0.454281	0.432129	1	0.965456	9.47985	12.7223	12.0245	3.46222	9.54895
AT1G10840.1	38373	| translation initiation factor 3 subunit H1 | Chr1:3607885-3610299 REVERSE LENGTH=337 | 201606	14	14	0.507218	0.0944429	0.133528	1	1.14997	1.12292	1.05639	0.923712	0.951664	0.821647	1	1.1709	1.06318	1.0066	1.11059	0.825349	0.810489	1	0.781075	0.865318	0.821376	0.940622	0.703945	0.888753
AT1G10940.1	41169	| Protein kinase superfamily protein | Chr1:3656050-3658170 REVERSE LENGTH=363 | 201606	12	1	3.89297e-08	1.45193e-05	0.000853602	1	0.887847	63.501	59.3711	36.434	92.0152	36.0775	1	0.921884	78.9958	86.8282	50.5113	91.5794	105.5	1	0.965456	50.0965	41.3357	51.4947	92.8974	68.0385
AT1G10940.2	42148	| Protein kinase superfamily protein | Chr1:3656050-3658170 REVERSE LENGTH=371 | 201606	11	2	2.04741e-06	2.44146e-07	5.39595e-06	1	0.887847	0.866903	0.891703	36.434	0.862579	36.0775	1	0.921884	0.846091	0.838015	50.5113	0.806983	105.5	1	0.965456	0.967021	0.948178	51.4947	0.869703	68.0385
AT1G10950.1	66893	| transmembrane nine 1 | Chr1:3659322-3663622 FORWARD LENGTH=589 | 201606	7	7	0.000856454	0.112057	0.388497	1	1.84122	1.33562	1.01909	1.29204	1.00349	0.0834115	1	0.920005	0.894419	0.639216	1.09763	1.14238	0.843441	1	0.684536	0.715287	0.669423	0.791586	0.863071	0.54005
AT1G10960.1	15897	| ferredoxin 1 | Chr1:3664445-3664891 FORWARD LENGTH=148 | 201606	8	5	0.280992	0.0225247	0.308622	1	3.31502	0.43165	0.976822	2.9	1.2622	1.21	1	1.64494	0.838301	0.52712	0.96198	0.724327	1.42168	1	2.59593	1.51527	1.11806	2.17413	2.59032	1.98406
AT1G11260.1	57611	| sugar transporter 1 | Chr1:3777460-3780133 FORWARD LENGTH=522 | 201606	10	10	0.000807506	0.156135	0.0101959	1	3.92539	2.19468	1.23777	1.84382	2.06867	0.457148	1	1.75607	2.26524	2.0565	2.0794	2.81079	2.49456	1	3.95738	2.37165	4.32608	3.16487	5.00727	3.06128
AT1G11310.1	65544	| Seven transmembrane MLO family protein | Chr1:3800899-3803870 REVERSE LENGTH=573 | 201606	3	3	0.144328	0.0569294	0.182751	1	3.03281	3.69391	1.57675	0.253341	3.72359	1.61876	1	0.242116	2.22211	2.99748	2.82952	5.64136	1.45539	1	0.535428	0.924701	1.74603	2.94591	3.5993	2.14035
AT1G11310.3	58392	| Seven transmembrane MLO family protein | Chr1:3800899-3803381 REVERSE LENGTH=511 | 201606	3	3	0.0725285	0.0303677	0.0662662	1	11.875	14.4636	6.17376	0.99196	14.5798	6.33827	1	0.921884	8.46091	11.4132	10.7737	21.4801	5.54155	1	3.85991	6.66618	12.5872	21.2371	25.9474	15.4298
AT1G11350.1	93234	| S-domain-1 13 | Chr1:3817725-3820752 REVERSE LENGTH=830 | 201606	2	2	0.041427	0.353423	0.000444578	1	1.7197	0.0844531	0.621292	0.0966361	0.345046	0.0879929	1	0.0921884	0.920475	0.0838015	0.0825627	0.829777	0.824546	1	0.426044	0.156993	0.040598	0.0386853	0.037238	0.158835
AT1G11360.1	26508	| Adenine nucleotide alpha hydrolases-like superfamily protein | Chr1:3822171-3822899 REVERSE LENGTH=242 | 201606	4	4	0.692955	0.804028	0.0011879	1	2.12573	2.06521	0.891469	2.34035	1.26999	1.33915	1	1.89029	1.23648	1.70119	2.41315	1.56625	1.18576	1	1.57584	0.945395	3.06312	0.613101	1.1416	0.0907556
AT1G11430.1	26201	| plastid developmental protein DAG | Chr1:3847273-3848938 FORWARD LENGTH=232 | 201606	6	6	0.201317	0.101635	0.0410262	1	1.85596	0.574958	1.36674	1.18666	1.22882	1.79276	1	1.21561	0.446941	0.898014	0.761432	1.23541	1.03468	1	0.480006	0.417	0.75976	0.730397	0.809015	0.750806
AT1G11580.1	61687	| methylesterase PCR A | Chr1:3888730-3890649 FORWARD LENGTH=557 | 201606	8	8	1.49128e-05	0.0153606	0.000814381	1	0.257048	0.307618	0.285596	0.350765	0.387965	0.175214	1	0.349874	0.77519	1.15251	1.54521	1.29647	1.63508	1	0.156086	0.334967	0.394143	0.816362	0.727706	0.718862
AT1G11650.2	44115	| RNA-binding (RRM/RBD/RNP motifs) family protein | Chr1:3914895-3917941 FORWARD LENGTH=405 | 201606	11	11	0.0213787	0.175629	0.394402	1	1.12115	0.775416	0.708431	0.856044	0.456135	0.870087	1	0.934865	0.7631	1.07953	0.687781	0.671755	1.08061	1	0.964022	0.660461	0.768893	0.677423	0.783434	0.754634
AT1G11660.1	85219	| heat shock protein 70 (Hsp 70) family protein | Chr1:3921056-3924347 FORWARD LENGTH=763 | 201606	10	10	0.123968	0.0132959	0.0472607	1	1.19022	0.673111	1.26552	1.12207	0.607468	0.574966	1	1.21795	0.958131	0.744311	1.34414	0.506037	0.599622	1	0.61169	0.74163	1.10005	0.857696	0.55225	0.341677
AT1G11720.1	118512	| starch synthase 3 | Chr1:3952460-3956840 FORWARD LENGTH=1042 | 201606	10	10	0.0380858	0.053302	0.036356	1	0.887504	1.60564	1.27232	1.57079	2.34797	0.528029	1	0.820768	1.51023	1.28798	0.920655	2.06608	1.11472	1	0.776194	1.24111	0.855593	1.62768	0.961061	0.931136
AT1G11750.1	29382	| CLP protease proteolytic subunit 6 | Chr1:3967609-3969535 FORWARD LENGTH=271 | 201606	16	16	0.0138673	0.000910178	0.0124547	1	0.579302	0.623812	0.607593	0.645859	0.630958	0.651007	1	0.635428	0.595881	0.547361	0.514937	0.569578	0.515229	1	0.933686	0.71178	0.854311	0.799941	0.714782	0.929064
AT1G11840.1	31928	| glyoxalase/bleomycin resistance protein/dioxygenase superfamily protein | Chr1:3996045-3997518 FORWARD LENGTH=283 | 201606	27	25	0.00721626	0.0384056	0.00588685	1	0.951594	0.941459	1.01853	1.16118	1.25716	1.2299	1	1.02665	1.0269	1.13649	0.924691	1.22848	1.17752	1	0.803867	0.823429	0.868132	0.960036	0.958388	1.0248
AT1G11840.6	36292	| glyoxalase/bleomycin resistance protein/dioxygenase superfamily protein | Chr1:3995928-3997518 FORWARD LENGTH=322 | 201606	28	26	2.65223e-13	7.89242e-11	1.46548e-13	1	263.169	0.866903	0.891703	321.132	347.674	340.136	1	287.601	0.846091	0.838015	259.039	344.142	329.865	1	257.29	0.967021	0.948178	307.274	306.746	328.001
AT1G11860.1	44445	| Glycine cleavage T-protein family | Chr1:4001801-4003245 FORWARD LENGTH=408 | 201606	96	96	7.9614e-06	0.015811	0.0220423	1	0.999334	1.17812	1.09387	1.02637	1.11525	1.31613	1	1.06305	1.11977	1.18901	0.942645	0.985445	0.980861	1	0.914124	0.962118	0.893172	0.907892	0.804716	0.84248
AT1G11870.2	57352	| Seryl-tRNA synthetase | Chr1:4003895-4006556 FORWARD LENGTH=514 | 201606	14	14	0.099047	0.00185181	0.0191228	1	0.742683	0.699513	0.867	0.742353	0.506077	0.931195	1	1.41895	0.785713	1.26162	0.556628	0.71708	0.674358	1	0.879558	0.648262	0.897005	0.609432	0.33269	0.629218
AT1G11890.1	25332	| Synaptobrevin family protein | Chr1:4011509-4012835 FORWARD LENGTH=218 | 201606	8	8	0.0173346	0.0122377	0.350216	1	1.44043	1.83928	1.22967	0.874541	0.982156	0.237091	1	0.652933	1.02118	0.594435	1.16974	0.52018	0.284979	1	1.40114	1.7763	1.27797	1.51073	1.83303	0.51583
AT1G11905.1	25364	| B-cell receptor-associated protein 31-like protein | Chr1:4014958-4016222 FORWARD LENGTH=221 | 201606	4	4	1.91932e-05	0.000616122	0.0607288	1	0.887847	0.866903	0.891703	0.99196	0.862579	0.903238	1	0.921884	3.30399	0.838015	21.3801	0.806983	0.793008	1	0.965456	12.6653	0.948178	18.0701	0.869703	0.928317
AT1G11910.1	54614	| aspartic proteinase A1 | Chr1:4017119-4019874 REVERSE LENGTH=506 | 201606	30	30	0.00258849	8.45059e-06	5.25875e-08	1	1.0561	0.700263	1.04995	1.19517	1.51165	1.27478	1	0.949332	0.6899	1.03697	1.1936	1.24692	1.61833	1	1.01622	1.21507	1.21744	0.990864	2.02858	1.65015
AT1G11930.1	28008	| Putative pyridoxal phosphate-dependent enzyme%2C YBL036C type | Chr1:4028783-4030298 FORWARD LENGTH=257 | 201606	7	7	0.10888	0.392894	0.307771	1	1.65132	0.974814	1.20942	2.22734	1.92369	1.79783	1	0.850493	0.858209	1.33787	0.9303	0.678122	1.13372	1	1.5772	1.31977	1.30186	0.819299	1.25565	1.34823
AT1G12000.1	61460	| Phosphofructokinase family protein | Chr1:4050159-4053727 REVERSE LENGTH=566 | 201606	22	15	2.7154e-05	0.000211148	1.0161e-05	1	1.11558	0.896357	0.970836	0.673044	0.366657	0.800335	1	0.936007	1.02646	1.06733	0.800931	0.505291	0.411324	1	1.03092	0.678839	0.547279	0.643254	0.309156	0.394416
AT1G12050.1	46095	| fumarylacetoacetase | Chr1:4072904-4075856 FORWARD LENGTH=421 | 201606	10	10	0.0205672	0.736619	0.0123381	1	1.55186	2.27014	2.56167	2.75134	2.78526	3.04752	1	1.11456	1.17193	1.20943	1.04005	1.11506	1.40468	1	2.22836	2.0071	2.08988	1.44872	2.61727	3.07614
AT1G12080.1	11675	| Vacuolar calcium-binding protein-like protein | Chr1:4084289-4084888 FORWARD LENGTH=104 | 201606	2	2	0.00329986	2.35098e-06	0.0168457	1	0.887847	23.1326	0.891703	0.99196	0.862579	18.0128	1	0.921884	25.2661	0.838015	0.825627	0.806983	5.61504	1	0.965456	22.0487	0.948178	0.903506	0.869703	12.7562
AT1G12080.2	15382	| Vacuolar calcium-binding protein-like protein | Chr1:4084289-4084888 FORWARD LENGTH=138 | 201606	3	3	0.00767123	3.6803e-05	0.08552	1	1.99546	0.980274	1.1308	0.0420356	0.0365529	0.763316	1	0.933441	1.0993	1.70333	0.0359221	0.0351109	0.244304	1	1.11286	1.08776	0.488233	0.0445742	0.0429066	0.629322
AT1G12140.1	52104	| flavin-monooxygenase glucosinolate S-oxygenase 5 | Chr1:4121386-4123366 FORWARD LENGTH=459 | 201606	4	4	0.0500441	0.0144036	0.592224	1	0.0530254	0.362014	0.0532557	0.233632	0.0515163	0.0539446	1	0.133082	1.22141	2.79147	5.06753	1.22488	0.448674	1	0.136772	0.944367	1.81204	1.73127	2.04822	0.13151
AT1G12140.2	51934	| flavin-monooxygenase glucosinolate S-oxygenase 5 | Chr1:4121386-4123366 FORWARD LENGTH=457 | 201606	4	4	0.0500441	0.00527328	0.20443	1	0.0530254	0.362014	0.0532557	0.233632	0.0515163	0.0539446	1	0.133082	1.22141	0.120975	5.06753	1.22488	0.448674	1	0.136772	0.944367	0.134324	1.73127	2.04822	0.13151
AT1G12230.1	43994	| Aldolase superfamily protein | Chr1:4148050-4150708 FORWARD LENGTH=405 | 201606	16	16	0.0211931	2.15382e-07	0.0013901	1	0.916844	0.785384	0.906596	0.824701	0.540838	0.612456	1	0.775696	0.752703	0.707941	0.600537	0.478874	0.346544	1	1.1621	0.829086	0.927861	0.952681	0.450555	0.722411
AT1G12240.1	73844	| Glycosyl hydrolases family 32 protein | Chr1:4153699-4157457 FORWARD LENGTH=664 | 201606	24	19	0.00462475	0.110639	0.000908129	1	0.899119	0.88968	0.728788	1.16741	0.841283	0.844296	1	0.948311	1.01337	0.992233	0.921544	0.833045	1.11581	1	0.866477	0.55904	1.11298	0.928523	1.14137	0.929823
AT1G12250.1	30065	| Pentapeptide repeat-containing protein | Chr1:4159287-4161269 FORWARD LENGTH=280 | 201606	13	13	0.157304	0.0011487	0.0122884	1	1.05514	0.955867	1.10135	1.02562	0.994995	1.29787	1	1.38308	0.797923	0.953428	0.751443	0.707406	0.64203	1	0.817923	0.874802	0.757918	0.822093	0.482886	0.822342
AT1G12250.2	21768	| Pentapeptide repeat-containing protein | Chr1:4159623-4161269 FORWARD LENGTH=206 | 201606	13	13	3.09535e-08	2.29244e-07	2.12547e-09	1	1.05514	0.00434731	0.00447167	1.02562	0.994995	1.29787	1	1.38308	0.00412269	0.00408334	0.751443	0.707406	0.64203	1	0.817923	0.00366919	0.0035977	0.822093	0.482886	0.822342
AT1G12270.1	64585	| stress-inducible protein | Chr1:4172105-4174575 FORWARD LENGTH=572 | 201606	12	9	0.000684327	0.191591	0.025323	1	0.861734	0.695457	0.716436	0.625726	0.630435	1.20681	1	1.05397	1.15342	0.842199	0.914237	0.780381	0.827233	1	1.14427	1.03931	0.662959	0.903668	1.0967	1.34225
AT1G12310.1	16517	| Calcium-binding EF-hand family protein | Chr1:4187500-4187946 REVERSE LENGTH=148 | 201606	8	4	0.877778	0.680558	0.374896	1	0.955108	0.999432	0.831354	1.13257	0.797348	1.03819	1	1.19226	0.851434	1.32703	0.774334	0.763668	1.08951	1	0.890158	1.30928	1.3047	1.24784	0.666956	0.788522
AT1G12350.1	35369	| 4-phospho-panto-thenoylcysteine synthetase | Chr1:4198870-4200633 FORWARD LENGTH=317 | 201606	6	6	0.0412522	0.575578	0.754694	1	1.78792	1.40996	1.11857	0.747073	1.19236	0.680255	1	0.81769	0.9557	0.752705	0.821711	1.0858	1.2494	1	0.775794	0.960909	1.13519	1.09455	1.22375	0.933349
AT1G12360.1	75083	| Sec1/munc18-like (SM) proteins superfamily | Chr1:4201172-4206144 FORWARD LENGTH=666 | 201606	8	8	0.0233186	0.00240665	0.132596	1	1.79176	1.31728	1.34965	1.48759	0.720186	0.455705	1	1.56416	1.4018	1.40225	3.17302	1.21669	0.927918	1	1.65351	1.49901	1.89039	1.15993	1.47911	0.792247
AT1G12410.1	31209	| CLP protease proteolytic subunit 2 | Chr1:4223099-4224954 FORWARD LENGTH=279 | 201606	19	19	0.0169808	0.54651	0.607757	1	0.696849	0.866861	0.930306	0.992001	0.964068	1.14516	1	0.922199	0.992986	0.973652	0.851288	0.829381	0.824069	1	1.03369	1.03677	1.2122	1.07829	1.13817	1.2165
AT1G12520.1	33851	| copper chaperone for SOD1 | Chr1:4267277-4268900 REVERSE LENGTH=320 | 201606	10	10	0.0123976	0.169951	0.103485	1	1.09735	1.15836	0.860212	0.956191	0.718069	0.753754	1	0.873042	1.05452	0.835223	0.736678	0.886009	0.990259	1	0.969229	0.809615	0.719872	1.22956	0.697464	0.855312
AT1G12780.1	39158	| UDP-D-glucose/UDP-D-galactose 4-epimerase 1 | Chr1:4356124-4358120 REVERSE LENGTH=351 | 201606	16	14	0.0546521	0.0502215	0.00908437	1	1.4711	1.31863	1.14575	0.616193	1.35041	1.37397	1	0.836442	1.24282	1.13213	0.776581	1.2733	1.78791	1	1.06335	1.45608	1.1436	1.71232	2.47882	1.66979
AT1G12800.1	85668	| Nucleic acid-binding%2C OB-fold-like protein | Chr1:4361778-4365189 REVERSE LENGTH=767 | 201606	15	15	4.82096e-05	1.19088e-06	1.28229e-10	1	0.442771	0.452432	0.915605	0.352615	0.123112	0.214277	1	0.287154	0.525395	0.383209	0.0972633	0.117372	0.00571672	1	0.251689	0.0447165	0.186236	0.156745	0.057726	0.0806966
AT1G12840.1	42619	| vacuolar ATP synthase subunit C (VATC) / V-ATPase C subunit / vacuolar proton pump C subunit (DET3) | Chr1:4375584-4378220 FORWARD LENGTH=375 | 201606	32	32	0.00247412	4.35316e-06	0.0130841	1	1.2044	1.24929	0.949421	1.42159	1.22776	0.812815	1	1.09021	0.898982	0.929371	1.02963	1.47898	1.40428	1	1.15096	1.1562	1.25058	1.13932	1.38177	0.979794
AT1G12900.1	42847	| glyceraldehyde 3-phosphate dehydrogenase A subunit 2 | Chr1:4392634-4394283 REVERSE LENGTH=399 | 201606	106	37	0.0107422	0.00155594	0.00174419	1	0.947783	0.897452	0.975833	1.00059	0.941453	1.10769	1	1.04361	0.904121	0.923362	0.801782	0.809737	0.776337	1	0.966323	0.88528	0.851276	0.797158	0.718505	0.796896
AT1G12920.1	48941	| eukaryotic release factor 1-2 | Chr1:4396555-4397859 REVERSE LENGTH=434 | 201606	9	2	0.0152113	0.342314	0.532603	1	0.707826	0.760277	0.673401	0.99135	0.446336	0.611695	1	0.877418	0.887084	0.759413	0.920157	0.614683	0.605622	1	1.22195	1.38307	1.32988	0.965845	1.03944	0.99028
AT1G13020.1	59325	| eukaryotic initiation factor 4B2 | Chr1:4440927-4443520 REVERSE LENGTH=549 | 201606	16	12	0.0394366	0.0333738	0.0330277	1	1.51569	3.56399	3.30165	1.94216	2.20632	4.50172	1	1.45027	3.03211	1.91788	1.52455	2.32404	2.12792	1	2.90427	2.2735	1.51463	1.9032	2.4415	2.32997
AT1G13060.1	29668	| 20S proteasome beta subunit E1 | Chr1:4452641-4454663 FORWARD LENGTH=274 | 201606	15	5	0.0550557	0.172725	0.0951821	1	0.91109	1.12808	1.312	1.31368	1.23174	1.15298	1	1.11668	1.32306	1.33448	1.29201	1.17983	1.52445	1	1.24638	1.2473	1.07094	1.40908	1.37424	1.32127
AT1G13080.1	57140	| cytochrome P450%2C family 71%2C subfamily B%2C polypeptide 2 | Chr1:4459212-4460807 FORWARD LENGTH=502 | 201606	5	4	4.87673e-05	0.000107114	0.0601151	1	0.891585	0.165465	0.169242	0.367174	0.476699	0.0247606	1	0.187287	0.119189	0.0170249	0.116504	0.226612	0.0161105	1	0.231611	0.361673	0.0849908	0.146789	0.274875	0.0214332
AT1G13090.2	56537	| cytochrome P450%2C family 71%2C subfamily B%2C polypeptide 28 | Chr1:4461846-4463400 FORWARD LENGTH=490 | 201606	12	5	0.0238222	0.226438	0.0115464	1	1.76909	1.80086	1.62435	2.04879	1.86666	0.599338	1	0.80166	1.12524	1.50048	1.88939	1.79245	1.51852	1	0.784619	1.27	1.29886	1.07555	2.02905	0.842628
AT1G13100.1	56006	| cytochrome P450%2C family 71%2C subfamily B%2C polypeptide 29 | Chr1:4463983-4465538 FORWARD LENGTH=490 | 201606	5	1	0.00393375	0.000193711	4.37818e-08	1	0.0532169	0.0519615	0.053448	0.0594573	0.0517023	0.0541394	1	0.0455189	0.0417765	0.0413777	0.0407661	0.0398455	0.0391555	1	0.0412997	0.0413667	0.0405606	0.0386496	0.0372037	0.039711
AT1G13110.1	57209	| cytochrome P450%2C family 71 subfamily B%2C polypeptide 7 | Chr1:4467272-4468857 FORWARD LENGTH=504 | 201606	24	18	0.00266009	0.00723724	0.213614	1	1.70334	1.73612	1.06651	1.17857	1.67611	0.552143	1	0.917027	0.964702	1.00035	0.923108	1.73249	1.54109	1	1.34001	1.66003	1.28372	0.994588	1.71384	1.09739
AT1G13210.1	136584	| autoinhibited Ca2+/ATPase II | Chr1:4509252-4513774 REVERSE LENGTH=1203 | 201606	6	6	0.0065095	0.0236741	0.000505867	1	0.226751	2.94091	0.227736	0.253341	1.55715	0.230682	1	0.921884	5.86684	0.838015	0.825627	24.6875	0.793008	1	0.965456	18.4785	9.55053	0.903506	54.8307	0.928317
AT1G13270.1	40424	| methionine aminopeptidase 1B | Chr1:4544999-4547155 FORWARD LENGTH=369 | 201606	10	10	0.0353243	0.00553254	0.00278139	1	1.05106	1.15443	1.12299	0.948022	0.477486	1.10551	1	1.03733	1.01331	0.648169	0.467997	0.492572	0.534811	1	0.818891	0.437078	0.602258	0.683932	0.368372	0.675294
AT1G13280.1	27809	| allene oxide cyclase 4 | Chr1:4547624-4548552 FORWARD LENGTH=254 | 201606	6	5	0.233752	0.00607617	2.36078e-05	1	0.884606	0.765824	0.589311	0.542185	1.23398	0.700623	1	0.541325	0.913499	0.895555	0.70565	1.67913	1.65032	1	0.769685	1.23626	0.943228	0.722969	1.73604	2.03951
AT1G13320.1	65517	| protein phosphatase 2A subunit A3 | Chr1:4563692-4567348 REVERSE LENGTH=587 | 201606	25	14	0.000775492	0.343061	0.210921	1	0.952485	0.951428	1.2954	1.01417	1.08796	0.495247	1	0.933511	1.13797	1.20708	1.44958	1.05925	1.22533	1	1.19829	1.46043	1.48237	1.1959	1.43262	1.37877
AT1G13440.1	36913	| glyceraldehyde-3-phosphate dehydrogenase C2 | Chr1:4608465-4610494 REVERSE LENGTH=338 | 201606	110	14	1.44614e-14	6.82588e-13	6.80057e-17	1	0.986106	0.992888	0.980808	0.000418607	1.01963	0.000381166	1	1.05952	1.17553	1.17971	0.000384894	1.04639	0.000369687	1	0.977701	0.955156	1.1038	0.000366432	1.07315	0.000376495
AT1G13440.2	33906	| glyceraldehyde-3-phosphate dehydrogenase C2 | Chr1:4608465-4610494 REVERSE LENGTH=310 | 201606	102	1	3.72511e-17	2.13132e-12	4.28337e-20	1	0.887847	0.866903	0.891703	2118.05	0.862579	2317.94	1	0.921884	0.846091	0.838015	2452.29	0.806983	2062.73	1	0.965456	0.967021	0.948178	2495.14	0.869703	2271.17
AT1G13470.1	44095	| hypothetical protein (DUF1262) | Chr1:4620322-4621542 REVERSE LENGTH=379 | 201606	11	11	0.000172094	1.68051e-06	2.90151e-10	1	1.03319	1.00488	0.596531	2.12184	4.40218	0.895441	1	0.597035	3.62402	2.57301	6.84668	4.2846	5.65708	1	2.58056	2.54663	10.1113	6.03813	23.1608	9.27685
AT1G13520.1	44527	| hypothetical protein (DUF1262) | Chr1:4631857-4633223 REVERSE LENGTH=387 | 201606	2	2	3.32408e-20	1.0046e-14	4.54025e-05	1	0.887847	0.866903	0.891703	0.99196	8.62579	0.903238	1	0.921884	0.846091	0.838015	16.5125	8.06983	0.793008	1	0.965456	0.967021	0.948178	9.24605	25.9916	0.928317
AT1G13560.1	43542	| aminoalcoholphosphotransferase 1 | Chr1:4638834-4641691 REVERSE LENGTH=389 | 201606	4	2	0.228628	0.0231882	0.0398211	1	0.888929	0.57585	0.0443951	0.655394	0.867231	0.466199	1	0.0872604	0.571238	0.0793218	1.75993	3.82697	3.29579	1	0.776788	0.955265	0.0573409	1.08698	2.08977	0.391612
AT1G13690.1	19809	| ATPase E1 | Chr1:4693380-4694179 FORWARD LENGTH=177 | 201606	5	5	0.0221826	0.174385	0.00138603	1	0.88899	1.37252	1.57923	0.976292	1.02459	2.86382	1	0.497185	1.73419	2.57861	1.62927	2.46749	2.83674	1	7.17075	3.121	3.11629	3.73365	8.61275	9.97695
AT1G13750.1	68242	| Purple acid phosphatases superfamily protein | Chr1:4715490-4718091 REVERSE LENGTH=613 | 201606	9	9	6.26618e-07	5.81569e-05	2.34428e-07	1	17.6525	40.34	26.5903	13.2376	77.4648	39.1428	1	24.1838	42.3045	72.6071	61.8564	64.4228	105.35	1	2.12045	1.13221	5.78148	3.31522	11.0398	7.4671
AT1G13900.1	73717	| Purple acid phosphatases superfamily protein | Chr1:4753494-4755554 REVERSE LENGTH=656 | 201606	14	14	0.000275376	0.00145361	0.00518551	1	3.56745	2.26773	3.58062	1.58518	6.23547	3.81822	1	3.42456	2.96911	6.02633	3.2814	6.29305	7.15775	1	1.65929	2.84886	3.76736	3.62813	4.60867	4.39253
AT1G13930.1	16164	| oleosin-B3-like protein | Chr1:4761091-4761558 FORWARD LENGTH=155 | 201606	20	20	7.31051e-08	0.00236643	5.06816e-05	1	1.21413	1.38058	1.48062	1.20722	1.50313	2.22726	1	1.20115	1.45159	1.63459	1.11147	1.32043	1.71591	1	1.15604	1.49017	1.17723	1.33275	1.24417	1.64751
AT1G13950.1	17360	| eukaryotic elongation factor 5A-1 | Chr1:4773631-4774668 FORWARD LENGTH=158 | 201606	5	2	0.00184615	0.00459537	0.000268461	1	0.887847	43.2145	38.7825	19.7955	14.304	45.2461	1	0.921884	50.9861	33.7331	32.6568	18.8691	26.4941	1	0.965456	28.3391	18.8527	51.221	29.0159	30.9107
AT1G13980.1	162618	| sec7 domain-containing protein | Chr1:4789587-4794397 FORWARD LENGTH=1451 | 201606	4	3	0.00412904	0.320385	0.136043	1	1.05215	0.583982	0.0452219	0.0503064	0.0437449	0.045807	1	0.378373	1.10982	0.0830997	1.06156	0.0800226	0.588076	1	0.968116	1.52278	0.0925219	0.35785	0.0848644	0.0905838
AT1G13980.2	162618	| sec7 domain-containing protein | Chr1:4789587-4794397 FORWARD LENGTH=1451 | 201606	4	3	0.00412904	0.125874	0.136043	1	1.05215	0.583982	0.0452219	0.0503064	0.0437449	0.045807	1	0.378373	1.10982	0.0830997	1.06156	0.0800226	0.0786368	1	0.968116	1.52278	0.0925219	0.35785	0.0848644	0.0905838
AT1G14000.1	49335	| VH1-interacting kinase | Chr1:4797606-4800043 FORWARD LENGTH=438 | 201606	21	20	0.141855	0.529704	0.0636724	1	1.30355	0.974876	0.941491	0.895953	0.939969	1.26859	1	0.800406	0.955435	0.959054	1.04057	0.825297	0.770272	1	1.199	0.923037	1.14061	1.39639	1.42571	1.15279
AT1G14030.1	54612	| Rubisco methyltransferase family protein | Chr1:4805493-4807440 REVERSE LENGTH=482 | 201606	19	19	0.48841	0.000665546	0.0788418	1	1.1207	1.09484	1.51632	0.954846	1.3476	0.903845	1	0.807769	0.768747	0.990694	0.721276	0.905531	0.623817	1	0.632413	0.755992	0.864415	1.13023	0.542671	0.713199
AT1G14150.1	22157	| PsbQ-like 2 | Chr1:4839885-4840632 FORWARD LENGTH=190 | 201606	10	10	0.0102433	9.27695e-07	0.0170115	1	1.14998	0.698536	0.779681	1.09165	0.919976	0.553859	1	0.652614	0.366453	0.456961	0.409175	0.494887	0.415507	1	0.787236	0.734778	0.645278	0.571099	0.641579	0.561618
AT1G14250.1	53505	| GDA1/CD39 nucleoside phosphatase family protein | Chr1:4868675-4871203 FORWARD LENGTH=488 | 201606	6	6	3.28837e-07	0.00741329	6.68474e-08	1	0.182404	0.203564	0.00783726	0.290068	0.126673	0.476493	1	0.544767	0.728829	0.0134714	0.625801	0.518176	0.553383	1	0.175711	0.0879982	0.00862835	0.823534	0.238332	0.478204
AT1G14310.1	28180	| Haloacid dehalogenase-like hydrolase (HAD) superfamily protein | Chr1:4885049-4886672 FORWARD LENGTH=254 | 201606	3	3	0.165443	0.0365007	0.323529	1	0.763798	0.262807	0.636245	0.843783	0.37117	0.658774	1	1.07206	0.149677	0.736835	0.474612	0.466302	0.241107	1	0.966518	0.629241	1.15045	0.557695	0.0520452	0.574937
AT1G14320.1	24917	| Ribosomal protein L16p/L10e family protein | Chr1:4888270-4889408 FORWARD LENGTH=220 | 201606	21	7	0.0121462	0.0210458	0.839131	1	0.660408	0.965331	0.969847	0.702904	0.639298	0.215212	1	0.592176	1.22424	0.697358	1.17754	0.991224	0.64128	1	1.17466	1.14217	0.975886	1.07423	0.92417	0.845418
AT1G14345.1	21224	| NAD(P)-linked oxidoreductase superfamily protein | Chr1:4899176-4899766 FORWARD LENGTH=196 | 201606	9	9	0.00269041	0.00159745	0.0243973	1	1.19968	1.10545	0.720693	0.764916	0.695362	0.418014	1	1.0501	1.0271	0.58561	0.60439	1.09267	0.450837	1	0.624763	0.527863	0.487405	0.850341	0.644545	0.389925
AT1G14380.1	72849	| IQ-domain 28 | Chr1:4918279-4920761 REVERSE LENGTH=664 | 201606	3	3	0.00979045	0.366588	0.000685922	1	3.00614	3.7084	2.27736	0.253341	0.220298	0.230682	1	3.63662	8.59784	5.8136	0.825627	10.9453	3.22652	1	7.97336	0.239412	1.66316	0.223688	0.215319	0.22983
AT1G14400.1	17281	| ubiquitin carrier protein 1 | Chr1:4927294-4928136 REVERSE LENGTH=152 | 201606	2	2	0.0587108	0.105483	0.39011	1	0.0867729	0.847259	2.04089	1.60365	0.59589	0.915171	1	0.925374	0.628024	1.39612	1.61367	1.35432	2.64941	1	0.966999	1.82015	1.39144	1.72534	2.49884	1.38441
AT1G14410.1	29058	| ssDNA-binding transcriptional regulator | Chr1:4929352-4930810 REVERSE LENGTH=263 | 201606	12	9	0.052388	0.0796341	0.170835	1	0.716689	0.797509	0.947517	0.579192	0.598587	0.781078	1	0.829065	0.95664	0.753523	0.554727	0.726254	0.91973	1	1.44658	1.00451	0.773198	1.43119	1.14581	1.38873
AT1G14510.1	28286	| alfin-like 7 | Chr1:4962171-4964154 REVERSE LENGTH=252 | 201606	4	2	0.0737414	0.682584	0.0580518	1	0.973966	1.20972	0.803916	1.08416	0.431596	0.540968	1	0.755244	0.699828	0.482179	0.668116	0.670249	0.714389	1	2.42538	1.99196	2.60166	1.8187	1.5281	2.09901
AT1G14570.1	51808	| UBX domain-containing protein | Chr1:4983770-4987192 FORWARD LENGTH=468 | 201606	4	4	0.00222265	0.0375884	0.4134	1	1.7143	3.34545	3.43334	3.32797	3.71366	4.34926	1	1.3443	3.64739	2.03309	2.33057	3.89604	4.93144	1	1.25074	2.16554	1.52525	1.46186	0.862294	1.79974
AT1G14610.1	125926	| valyl-tRNA synthetase / valine-tRNA ligase (VALRS) | Chr1:5008502-5014486 REVERSE LENGTH=1108 | 201606	30	30	2.18717e-05	0.232258	0.489285	1	1.43586	1.40165	1.28063	1.06795	1.17087	0.360156	1	0.689945	1.03624	0.894146	1.0834	1.00081	0.823131	1	0.910972	1.06092	1.12145	1.03011	0.856658	0.732853
AT1G14670.1	68084	| Endomembrane protein 70 protein family | Chr1:5037669-5040199 FORWARD LENGTH=592 | 201606	11	2	4.0555e-05	1.51924e-05	0.000235469	1	2.45577	2.04442	0.0224942	1.41485	0.0217596	0.15989	1	0.83938	0.678056	0.0119716	1.24276	0.0115283	0.720943	1	1.20355	1.07647	0.0141902	1.21472	0.0130157	0.462091
AT1G14810.1	40746	| semialdehyde dehydrogenase family protein | Chr1:5102684-5104633 REVERSE LENGTH=375 | 201606	28	28	0.0934717	0.00361737	0.190237	1	0.888556	0.899907	1.02263	1.14731	0.971706	1.13712	1	1.41539	0.994266	1.04054	0.810201	1.07658	1.1091	1	1.28369	1.14982	1.12254	0.972843	1.22451	1.16338
AT1G14830.1	68723	| DYNAMIN-like 1C | Chr1:5107699-5111470 REVERSE LENGTH=614 | 201606	13	10	0.022838	0.000163078	0.156631	1	0.996626	0.919292	0.89545	1.09928	0.56231	0.266134	1	1.21115	0.985534	1.10838	1.91018	0.767373	0.291899	1	0.820903	1.10161	1.08966	1.26336	0.786687	0.511367
AT1G14850.1	160013	| nucleoporin 155 | Chr1:5116921-5123259 REVERSE LENGTH=1464 | 201606	13	13	0.000184989	0.179053	0.405862	1	1.33022	0.865837	0.843558	0.823126	0.814497	0.155246	1	0.927631	1.30442	1.01071	1.08474	1.68018	1.01368	1	0.865234	1.04963	0.752896	0.808498	1.20308	0.553073
AT1G14870.1	16742	| PLANT CADMIUM RESISTANCE 2 | Chr1:5128591-5129458 REVERSE LENGTH=152 | 201606	1	1	0.467735	0.000897163	0.000729328	1	0.887847	0.866903	0.891703	0.99196	0.862579	3.6263	1	0.921884	0.846091	3.28079	16.0758	0.806983	3.18153	1	0.965456	3.78069	13.194	15.0953	28.9275	9.56596
AT1G14880.1	16503	| PLANT CADMIUM RESISTANCE 1 | Chr1:5132791-5133663 REVERSE LENGTH=151 | 201606	9	9	1.8241e-07	1.44573e-05	2.59102e-10	1	0.0441664	2.01351	2.06958	2.1058	6.01271	5.84154	1	0.0307873	2.62573	2.69881	4.80616	3.23854	4.50762	1	0.0153073	0.906671	1.99183	2.61793	7.02405	2.99435
AT1G14980.1	10812	| chaperonin 10 | Chr1:5165930-5166654 REVERSE LENGTH=98 | 201606	10	10	0.00740059	0.0453949	0.648074	1	1.57101	1.48814	1.88394	1.70536	1.33336	2.24968	1	1.19346	1.17391	1.55337	1.36882	1.05307	1.59825	1	1.16377	1.15636	0.987822	0.99674	1.04908	1.27427
AT1G15000.1	49222	| serine carboxypeptidase-like 50 | Chr1:5168613-5169947 FORWARD LENGTH=444 | 201606	7	7	0.117355	1.72227e-05	0.000357962	1	2.96144	0.855481	2.94547	4.20915	5.66515	5.25952	1	0.445158	1.20161	2.1708	3.03539	4.72392	5.57417	1	1.42902	2.26927	5.44863	4.3213	8.35276	6.21927
AT1G15060.1	63675	| alpha/beta hydrolase family protein | Chr1:5184053-5186856 REVERSE LENGTH=578 | 201606	8	8	0.012853	0.000747291	0.0317559	1	1.68334	4.55208	4.21967	2.80434	5.31228	1.72445	1	6.53123	5.93996	9.49014	6.97222	12.739	14.592	1	1.656	1.45778	2.01398	0.64571	2.11094	1.58793
AT1G15125.1	38852	| S-adenosyl-L-methionine-dependent methyltransferases superfamily protein | Chr1:5204625-5205912 FORWARD LENGTH=351 | 201606	4	4	1.91932e-05	6.45218e-13	0.467518	1	0.887847	0.866903	0.891703	0.99196	0.862579	0.903238	1	0.921884	0.846091	0.838015	0.825627	32.2793	29.0664	1	0.965456	0.967021	0.948178	0.903506	0.869703	3.70963
AT1G15130.1	95209	| Endosomal targeting BRO1-like domain-containing protein | Chr1:5206217-5209848 REVERSE LENGTH=846 | 201606	24	24	0.0107284	0.299528	0.367753	1	1.1203	1.66377	1.04533	1.16191	1.23933	0.78805	1	1.07427	1.37546	0.945755	1.47642	0.977133	0.991727	1	0.796553	0.805922	0.923664	1.00862	0.99944	0.62885
AT1G15140.1	31924	| FAD/NAD(P)-binding oxidoreductase | Chr1:5210403-5212137 REVERSE LENGTH=295 | 201606	16	16	0.0152406	0.091561	0.00422671	1	0.726944	0.869045	1.08521	0.683869	0.677967	1.08558	1	0.864246	0.962333	0.998663	0.635596	0.65307	0.821961	1	0.682335	0.903521	0.758278	0.723973	0.662291	0.841513
AT1G15200.1	48905	| protein-protein interaction regulator family protein | Chr1:5228477-5231017 REVERSE LENGTH=423 | 201606	4	4	0.0283688	0.147252	0.295981	1	6.58125	14.4408	0.891703	0.99196	6.25687	15.0515	1	3.65459	4.73568	0.201578	4.00284	2.63286	3.81504	1	2.80396	1.95971	0.136216	3.09577	0.876977	3.56774
AT1G15200.2	49435	| protein-protein interaction regulator family protein | Chr1:5228477-5231017 REVERSE LENGTH=428 | 201606	5	5	0.00204375	0.0214289	0.0726912	1	0.887847	14.4408	0.891703	0.99196	6.25687	15.0515	1	0.921884	19.6875	0.838015	16.6409	10.9455	15.8602	1	0.965456	13.6413	0.948178	21.5492	6.10451	24.8345
AT1G15210.1	162570	| pleiotropic drug resistance 7 | Chr1:5231552-5236573 REVERSE LENGTH=1442 | 201606	36	1	3.25964e-10	1.63012e-06	2.91796e-09	1	1.41275	0.00372579	1.12115	0.00426326	1.38615	0.504686	1	1.30231	0.00360911	1.09619	0.00352182	1.67773	1.63812	1	1.35405	0.00325628	1.27638	0.0030424	1.44971	1.1044
AT1G15270.1	6978	| Translation machinery associated TMA7 | Chr1:5250833-5252020 REVERSE LENGTH=64 | 201606	2	2	1.73172e-06	0.0160935	0.0553685	1	26.6354	34.6761	23.703	13.1203	25.7101	27.0972	1	18.4377	28.2303	27.9547	21.3116	24.1233	29.1797	1	1.68709	1.93814	1.6473	2.48223	1.52555	2.55244
AT1G15290.1	177633	| Tetratricopeptide repeat (TPR)-like superfamily protein | Chr1:5257327-5264814 REVERSE LENGTH=1608 | 201606	7	5	1.08139e-06	6.15825e-06	0.00273709	1	0.838359	0.601584	0.395986	0.549089	0.0992335	0.0778502	1	0.447528	0.32833	0.189682	0.207842	0.235746	0.105162	1	0.571843	0.379693	0.339973	0.247966	0.157556	0.173463
AT1G15310.1	53007	| signal recognition particle 54 kDa subunit | Chr1:5269173-5271947 REVERSE LENGTH=479 | 201606	4	1	0.000131181	2.81327e-06	0.00663806	1	0.887847	23.1326	20.6549	0.99196	0.862579	0.903238	1	0.921884	36.6566	19.612	0.825627	0.806983	0.793008	1	0.965456	15.6057	19.1137	0.903506	0.869703	0.928317
AT1G15340.1	42358	| methyl-CPG-binding domain 10 | Chr1:5275895-5277474 REVERSE LENGTH=384 | 201606	13	13	1.29513e-05	9.67312e-05	7.92879e-05	1	2.24903	2.31458	2.37271	2.65028	2.64994	3.80212	1	1.31088	1.06242	1.38303	1.08959	1.95944	2.33919	1	1.69703	1.2562	1.24914	1.51595	1.25106	2.45064
AT1G15390.1	29996	| peptide deformylase 1A | Chr1:5294653-5295625 FORWARD LENGTH=269 | 201606	8	8	0.427118	0.210626	0.17001	1	0.617673	0.85641	1.06161	0.6939	0.770204	1.25391	1	0.687276	0.516373	0.565887	0.822306	0.496255	0.910041	1	1.1464	0.436071	1.02547	0.658217	1.03162	1.187
AT1G15470.1	36345	| Transducin/WD40 repeat-like superfamily protein | Chr1:5315838-5317696 FORWARD LENGTH=333 | 201606	3	1	0.166585	0.0615146	0.145527	1	1.14529	1.60849	1.27949	0.843239	1.35063	1.93619	1	1.81799	4.2079	2.30744	2.17452	3.02249	1.78034	1	1.37932	1.74179	0.677833	1.67261	1.98766	1.59114
AT1G15500.1	67530	| TLC ATP/ADP transporter | Chr1:5326426-5328688 FORWARD LENGTH=618 | 201606	9	5	0.00702295	0.0501036	0.300377	1	1.9476	1.36364	1.01153	1.24205	0.819226	0.0170558	1	0.876053	1.53978	1.08327	1.93079	2.13987	1.13551	1	1.059	1.55499	1.1635	1.33713	1.52797	0.662181
AT1G15520.1	161017	| pleiotropic drug resistance 12 | Chr1:5331993-5338175 REVERSE LENGTH=1423 | 201606	14	10	4.29396e-08	9.41514e-10	4.8898e-06	1	0.887847	28.9043	35.6681	42.9228	31.8313	0.903238	1	0.921884	36.7259	19.512	207.149	32.4151	0.793008	1	0.965456	76.5634	63.225	36.0441	63.4171	0.928317
AT1G15690.1	80820	| Inorganic H pyrophosphatase family protein | Chr1:5399115-5402185 FORWARD LENGTH=770 | 201606	31	31	0.00257775	0.09629	0.586481	1	1.34575	1.19832	0.841723	0.846549	0.93674	0.565161	1	0.703158	1.19004	0.870634	1.11014	1.28127	0.853228	1	0.943884	1.32951	1.13046	1.17319	1.04227	0.80665
AT1G15710.1	40633	| prephenate dehydrogenase family protein | Chr1:5404505-5405581 FORWARD LENGTH=358 | 201606	7	7	0.0472205	0.00101369	0.105095	1	1.17892	0.766941	0.639841	0.658888	0.810882	0.54999	1	0.498546	0.499618	0.494297	0.621866	0.693475	0.286857	1	0.866442	0.755985	0.518255	0.854377	0.733532	0.602402
AT1G15730.1	50259	| Cobalamin biosynthesis CobW-like protein | Chr1:5407535-5409937 REVERSE LENGTH=448 | 201606	5	4	0.0797274	2.683e-05	0.0101789	1	0.792195	0.346637	0.53249	0.587676	0.0258512	0.361374	1	0.539177	0.190037	0.188772	0.0776234	0.0109232	0.010734	1	0.386007	0.0755795	0.252471	0.24038	0.0173862	0.0185579
AT1G15750.1	124298	| Transducin family protein / WD-40 repeat family protein | Chr1:5415086-5420359 REVERSE LENGTH=1131 | 201606	23	11	1.13803e-05	0.379293	0.0352588	1	2.24649	3.13432	2.11891	1.85548	2.75562	0.136877	1	1.11787	1.90121	1.38599	1.57247	1.62231	1.27316	1	1.30538	2.14951	2.36534	1.49275	1.86408	1.02218
AT1G15790.1	20323	| mediator of RNA polymerase II transcription subunit 15a-like protein | Chr1:5438477-5439820 REVERSE LENGTH=179 | 201606	4	4	0.0079396	4.03485e-05	6.40995e-07	1	0.887847	11.5152	11.8043	6.79254	19.9234	24.064	1	0.921884	3.30399	22.1512	24.3321	18.8282	36.8648	1	12.9028	12.7965	15.9269	33.1509	57.9434	58.7602
AT1G15820.1	27522	| light harvesting complex photosystem II subunit 6 | Chr1:5446685-5447676 REVERSE LENGTH=258 | 201606	31	30	0.00957238	0.839166	0.604598	1	1.18512	0.996034	0.866034	1.11267	1.02187	0.761619	1	1.13262	0.994364	1.03717	0.993571	1.24554	1.08358	1	0.868427	1.20855	1.02549	1.02404	0.941034	1.07825
AT1G15930.1	15377	| Ribosomal protein L7Ae/L30e/S12e/Gadd45 family protein | Chr1:5471702-5472741 FORWARD LENGTH=144 | 201606	6	4	0.00126624	0.203493	0.848533	1	0.631517	0.708911	0.950092	0.914202	0.551123	1.47465	1	1.02554	1.39712	1.15883	1.3231	0.943349	1.38766	1	1.18985	0.903435	0.956487	1.14733	0.935869	1.14267
AT1G15950.1	37489	| cinnamoyl coa reductase 1 | Chr1:5478855-5481915 FORWARD LENGTH=344 | 201606	10	10	0.00961908	0.0584202	0.16159	1	0.607872	0.729686	0.845101	0.982201	0.631717	0.380026	1	0.649897	0.471462	0.636154	0.529953	0.44536	0.476134	1	0.853976	0.626405	0.614944	0.744455	0.719696	0.547267
AT1G15950.2	37187	| cinnamoyl coa reductase 1 | Chr1:5478855-5481949 FORWARD LENGTH=337 | 201606	10	10	2.38236e-05	0.00356426	9.37073e-05	1	0.887847	46.2196	53.5302	62.2144	40.0141	24.0715	1	0.921884	31.2293	42.1383	35.1036	29.5003	31.5387	1	0.965456	35.4278	34.7796	42.1044	40.7041	30.952
AT1G15950.6	30008	| cinnamoyl coa reductase 1 | Chr1:5478855-5480510 FORWARD LENGTH=276 | 201606	8	8	7.31432e-09	5.1234e-05	1.49036e-05	1	0.887847	46.2196	0.891703	0.99196	0.862579	24.0715	1	0.921884	31.2293	0.838015	0.825627	0.806983	31.5387	1	0.965456	35.4278	0.948178	0.903506	0.869703	30.952
AT1G15950.7	27009	| cinnamoyl coa reductase 1 | Chr1:5479798-5481915 FORWARD LENGTH=246 | 201606	8	8	4.69461e-08	5.26199e-06	1.76552e-07	1	38.5037	0.866903	0.891703	0.99196	40.0141	0.903238	1	43.0486	0.846091	0.838015	0.825627	29.5003	0.793008	1	48.2986	0.967021	0.948178	0.903506	40.7041	0.928317
AT1G15980.1	51022	| NDH-dependent cyclic electron flow 1 | Chr1:5489314-5491199 FORWARD LENGTH=461 | 201606	30	30	0.20593	0.000452038	0.323651	1	0.868324	0.927666	1.45729	1.19185	1.18937	1.11952	1	1.00792	0.607598	0.87032	0.516993	0.557479	0.570287	1	1.06182	0.923556	1.04428	0.79843	0.629956	0.955107
AT1G16030.1	70915	| heat shock protein 70B | Chr1:5502386-5504326 REVERSE LENGTH=646 | 201606	20	2	6.64649e-14	3.38471e-10	6.8745e-10	1	0.887847	464.651	472.148	503.246	0.862579	671.402	1	0.921884	539	475.054	620.251	0.806983	522.84	1	0.965456	530.443	513.047	602.447	0.869703	597.223
AT1G16080.1	34130	| nuclear protein | Chr1:5514394-5515761 FORWARD LENGTH=313 | 201606	32	32	0.209274	0.00107522	0.0106014	1	0.90473	0.877485	1.05882	1.00359	1.00494	1.03301	1	0.862571	0.825631	0.821212	0.798033	0.730154	0.645883	1	1.24524	0.885255	1.0918	1.01265	0.865456	0.981572
AT1G16210.1	26826	| coiled-coil protein | Chr1:5546352-5547447 REVERSE LENGTH=234 | 201606	5	5	0.214254	0.66089	0.339336	1	1.42315	1.72944	1.25166	1.18915	0.714064	1.98882	1	1.81068	2.33795	1.06675	2.06081	2.40438	1.94562	1	0.960203	1.08296	0.669531	0.910945	1.7415	1.45687
AT1G16240.1	25889	| syntaxin of plants 51 | Chr1:5555183-5556340 REVERSE LENGTH=232 | 201606	6	6	0.00402598	0.970561	0.139884	1	1.7798	1.12646	1.4262	0.991578	1.12343	0.995922	1	0.808214	0.893668	0.941375	0.886643	0.855123	0.944609	1	1.18462	1.37955	1.2311	0.898507	1.53093	0.925496
AT1G16300.1	44846	| glyceraldehyde-3-phosphate dehydrogenase of plastid 2 | Chr1:5574433-5577406 FORWARD LENGTH=420 | 201606	6	1	1.70214e-09	1.2261e-13	2.08693e-13	1	0.00685255	0.0066909	1.32787	0.00765611	0.00665753	0.00697135	1	0.00895174	0.00821576	1.79094	0.00801706	0.00783602	0.00770031	1	0.0078239	0.00783658	1.40892	0.00732186	0.00704793	0.00752293
AT1G16340.1	31676	| Aldolase superfamily protein | Chr1:5588123-5590469 REVERSE LENGTH=291 | 201606	6	3	0.0143935	0.00247979	0.392953	1	0.574702	0.458738	0.677401	0.525176	0.30438	0.531244	1	0.923292	0.488418	0.526621	0.685087	0.50785	0.375294	1	1.03236	0.611558	0.872951	0.705255	0.555927	0.862917
AT1G16350.1	54051	| Aldolase-type TIM barrel family protein | Chr1:5590951-5592872 FORWARD LENGTH=502 | 201606	19	14	0.013575	0.00421181	0.00634028	1	1.33857	1.45649	1.64631	1.35597	0.883146	0.976992	1	1.29416	1.31365	0.97117	0.978284	0.772232	0.604786	1	0.767799	0.647699	0.754332	0.689282	0.581571	0.502411
AT1G16410.1	61696	| cytochrome p450 79f1 | Chr1:5608862-5611118 FORWARD LENGTH=538 | 201606	5	5	0.00592292	8.45196e-05	0.00086024	1	0.269182	1.13831	0.991003	0.803877	1.31357	0.109608	1	0.172289	0.579277	0.159374	0.01543	1.1045	0.891089	1	0.137666	0.308973	0.0135202	0.0510593	0.409171	0.0965007
AT1G16460.1	34717	| rhodanese homologue 2 | Chr1:5619848-5621981 REVERSE LENGTH=318 | 201606	11	11	0.259266	0.113059	0.085434	1	1.33053	1.48884	1.48224	1.04442	1.09809	1.60275	1	0.959868	0.819283	0.839415	0.748701	0.690378	0.586346	1	1.13912	1.11897	0.863693	0.698253	0.595189	1.0132
AT1G16470.1	25701	| proteasome subunit PAB1 | Chr1:5623122-5625439 FORWARD LENGTH=235 | 201606	17	4	0.0529821	0.000368954	0.134416	1	1.33428	1.1817	1.61747	1.35384	1.23039	1.68626	1	1.28159	1.51835	1.63792	1.92599	1.5556	1.46613	1	1.30871	1.53693	1.64504	1.58746	1.73674	1.50274
AT1G16610.1	45348	| arginine/serine-rich 45 | Chr1:5675925-5678686 REVERSE LENGTH=414 | 201606	4	4	3.9452e-05	0.0188785	0.000442578	1	0.887847	0.866903	0.891703	0.99196	0.862579	12.0457	1	0.921884	0.846091	28.1671	13.4259	0.806983	13.0746	1	0.965456	0.967021	7.21369	0.903506	0.869703	21.6397
AT1G16610.2	44649	| arginine/serine-rich 45 | Chr1:5675925-5678686 REVERSE LENGTH=407 | 201606	3	3	3.9452e-05	0.0360313	1.69188e-08	1	0.887847	0.866903	0.891703	0.99196	0.862579	12.0457	1	0.921884	3.30399	0.838015	13.4259	0.806983	13.0746	1	0.965456	0.967021	0.948178	0.903506	0.869703	21.6397
AT1G16610.4	41978	| arginine/serine-rich 45 | Chr1:5676278-5678686 REVERSE LENGTH=381 | 201606	4	4	3.9452e-05	0.0221234	1.69188e-08	1	0.887847	0.866903	0.891703	0.99196	0.862579	12.0457	1	0.921884	0.846091	0.838015	13.4259	0.806983	13.0746	1	0.965456	0.967021	0.948178	0.903506	0.869703	21.6397
AT1G16670.1	43289	| Protein kinase superfamily protein | Chr1:5697846-5699492 FORWARD LENGTH=390 | 201606	6	5	0.00549473	0.000190206	2.45365e-06	1	5.15247	7.20669	8.17966	2.47519	8.59475	4.4996	1	3.82902	10.4669	10.3406	11.5281	10.6556	5.2257	1	1.36772	3.60769	5.78188	7.25624	7.78639	5.69821
AT1G16700.1	25378	| Alpha-helical ferredoxin | Chr1:5710012-5711694 FORWARD LENGTH=222 | 201606	10	3	6.73331e-05	0.00962955	0.0303722	1	1.34096	2.73157	4.14158	2.25643	3.59267	3.06837	1	1.24316	2.49074	2.97717	2.68262	2.87534	2.99636	1	1.29276	1.66594	2.30962	1.66089	1.89494	2.64646
AT1G16720.1	65709	| high chlorophyll fluorescence phenotype 173 | Chr1:5723161-5726248 FORWARD LENGTH=598 | 201606	28	28	2.07463e-05	0.00132196	0.000110064	1	1.19774	1.26935	1.517	1.02663	1.05957	0.405823	1	0.742129	0.738187	0.789436	0.670178	0.727625	0.458248	1	0.781749	0.922203	1.04593	0.951142	0.6548	0.501603
AT1G16790.1	15455	| ribosomal protein-like protein | Chr1:5744638-5745072 FORWARD LENGTH=144 | 201606	1	1	0.000345157	0.0475676	0.245029	1	1.25323	0.122366	0.87988	1.40018	0.48243	2.5499	1	1.28175	1.17637	0.473355	0.114792	0.779913	1.10256	1	0.774258	0.389835	0.405989	0.382463	0.369622	0.576014
AT1G16850.1	16704	| transmembrane protein | Chr1:5765062-5765618 REVERSE LENGTH=152 | 201606	3	3	0.000131809	0.00695914	0.0313627	1	3.57869	8.66903	20.8821	19.6091	17.0843	39.175	1	12.206	11.3085	16.7603	10.9084	18.8282	15.7285	1	12.8706	19.3404	19.1137	17.9886	11.5334	15.4468
AT1G16860.1	50583	| Ubiquitin-specific protease family C19-related protein | Chr1:5768280-5770183 FORWARD LENGTH=474 | 201606	4	2	4.85051e-06	0.00598585	0.00860094	1	0.0382043	0.995401	0.0383702	0.0426843	0.037117	0.0388666	1	0.0702679	0.872396	0.0638752	0.240172	0.0615099	0.0604447	1	0.0320654	0.420649	0.0314916	0.208286	0.0288852	0.030832
AT1G16880.1	31295	| uridylyltransferase-like protein | Chr1:5773796-5776125 FORWARD LENGTH=290 | 201606	25	25	0.0068873	6.34905e-06	0.000171507	1	0.878843	0.980249	0.842504	1.09816	0.723672	0.894697	1	0.678692	0.685853	0.678233	0.591701	0.500974	0.531242	1	0.732822	0.648771	0.692735	0.595208	0.587462	0.54222
AT1G16890.2	17220	| ubiquitin-conjugating enzyme 36 | Chr1:5776550-5778327 REVERSE LENGTH=153 | 201606	7	3	0.778056	0.0462306	0.0473173	1	0.987691	1.22314	1.096	1.15456	0.913455	1.06297	1	1.44384	1.57071	1.49006	1.71029	1.15223	1.52621	1	1.64836	1.50024	1.75142	1.67186	1.61049	1.51862
AT1G16920.1	24020	| RAB GTPase homolog A1B | Chr1:5787489-5789147 REVERSE LENGTH=216 | 201606	10	3	0.10944	8.11155e-05	0.000292028	1	1.10345	1.0022	1.04196	1.13444	0.664764	0.0209886	1	0.543264	0.345511	0.489705	0.613079	0.473682	0.0139417	1	1.93616	1.57033	2.02013	0.90582	1.62796	0.0348688
AT1G17050.1	46045	| solanesyl diphosphate synthase 2 | Chr1:5829289-5831215 FORWARD LENGTH=417 | 201606	11	10	0.114452	0.340477	0.00445046	1	1.13876	0.869828	1.08716	0.493296	0.718944	0.255233	1	0.629297	0.893806	0.833242	0.59195	0.720044	0.457237	1	1.05809	0.661983	0.762273	0.810773	0.389559	0.369609
AT1G17100.1	25388	| SOUL heme-binding family protein | Chr1:5844766-5845539 FORWARD LENGTH=232 | 201606	13	13	0.0110736	0.0904007	0.992929	1	0.755925	0.750063	0.877307	0.992661	0.920468	1.06135	1	0.857117	0.750281	0.854675	0.843112	0.76302	0.874766	1	1.06096	1.03227	1.01014	1.02282	1.088	1.08371
AT1G17160.1	40189	| pfkB-like carbohydrate kinase family protein | Chr1:5867678-5869215 FORWARD LENGTH=379 | 201606	8	8	0.756671	0.7512	0.201047	1	0.776584	0.574501	1.17747	0.983173	0.759785	1.09519	1	1.06812	1.05366	0.91507	0.683523	0.803608	1.0492	1	0.91297	0.86097	0.69553	0.571131	0.773535	0.635409
AT1G17160.2	37677	| pfkB-like carbohydrate kinase family protein | Chr1:5867678-5869175 FORWARD LENGTH=355 | 201606	8	8	0.0265112	0.000667194	6.05255e-07	1	23.4368	17.3381	35.5354	29.6715	22.9298	0.903238	1	42.8497	42.2699	36.7099	27.421	32.2384	0.793008	1	57.9016	54.6037	44.1113	36.2217	49.0584	0.928317
AT1G17170.1	25306	| glutathione S-transferase TAU 24 | Chr1:5869895-5870691 FORWARD LENGTH=218 | 201606	7	4	8.78301e-06	6.45185e-07	1.38643e-09	1	0.887847	49.2191	44.358	49.8281	54.5938	48.1677	1	0.921884	39.4569	64.0519	119.377	64.6039	58.1145	1	0.965456	89.0686	85.3361	120.541	95.579	55.6699
AT1G17190.1	25779	| glutathione S-transferase tau 26 | Chr1:5875452-5876375 FORWARD LENGTH=220 | 201606	8	7	0.702328	2.35913e-07	0.014723	1	0.887847	3.49996	3.49024	0.99196	3.41777	0.903238	1	0.921884	39.5042	36.0973	106.39	42.9558	47.5805	1	16.1189	47.008	25.2586	27.0237	34.6886	12.4027
AT1G17210.1	103090	| IAP-like protein 1 | Chr1:5880502-5884657 REVERSE LENGTH=958 | 201606	4	4	0.0166274	0.722173	0.476447	1	1.78599	1.52841	2.23864	0.754808	1.50263	2.50133	1	1.84883	1.2904	1.25134	1.02198	1.83007	1.80174	1	0.767728	0.57303	0.951799	1.4385	1.3845	1.66121
AT1G17220.1	109747	| Translation initiation factor 2%2C small GTP-binding protein | Chr1:5885383-5890165 FORWARD LENGTH=1026 | 201606	26	26	0.00940776	3.67752e-06	0.000577948	1	0.703289	0.774623	0.789309	0.662853	0.419255	0.685678	1	0.874779	0.839123	0.681042	0.552926	0.43733	0.463198	1	0.814019	0.492923	0.622927	0.653911	0.480596	0.574932
AT1G17290.1	59821	| alanine aminotransferas | Chr1:5922771-5926093 FORWARD LENGTH=543 | 201606	43	27	0.0255571	8.02114e-06	0.00326608	1	0.998107	0.871604	0.833042	1.02308	0.953865	1.11742	1	1.14201	0.994329	1.09403	1.44961	0.946769	1.22842	1	1.33683	1.0753	1.18782	1.19688	1.46738	1.50599
AT1G17370.1	46049	| oligouridylate binding protein 1B | Chr1:5951842-5954825 REVERSE LENGTH=419 | 201606	7	3	0.000742084	0.000447011	0.0859584	1	1.32593	1.82653	2.43462	0.860936	0.537615	1.34496	1	0.731237	1.61588	2.07733	1.36691	0.908363	0.979904	1	0.662767	0.477104	0.829225	0.73461	0.487981	0.638001
AT1G17370.2	45733	| oligouridylate binding protein 1B | Chr1:5951842-5954825 REVERSE LENGTH=416 | 201606	7	3	0.000405204	1.40142e-05	2.83273e-06	1	1.32593	1.82653	0.0331946	0.860936	0.537615	0.033624	1	0.731237	1.61588	0.0283003	1.36691	0.908363	0.0267804	1	0.662767	0.477104	0.0177639	0.73461	0.487981	0.0173918
AT1G17420.1	103726	| lipoxygenase 3 | Chr1:5977512-5981384 FORWARD LENGTH=919 | 201606	3	1	3.44419e-06	0.467491	2.03268e-05	1	0.887847	0.866903	0.891703	16.5948	0.862579	0.903238	1	0.921884	0.846091	0.838015	3.15096	0.806983	0.793008	1	0.965456	0.967021	0.948178	24.0489	0.869703	0.928317
AT1G17470.1	44639	| developmentally regulated G-protein 1 | Chr1:6003442-6006155 FORWARD LENGTH=399 | 201606	5	5	0.000608618	0.00121729	0.000500877	1	2.11188	5.36615	8.43131	2.7981	0.12336	3.01266	1	1.7525	5.26804	4.80742	4.56337	0.463271	1.51962	1	1.60899	0.789804	1.5741	0.902776	0.300748	0.478759
AT1G17580.1	172907	| myosin 1 | Chr1:6039453-6049309 FORWARD LENGTH=1520 | 201606	4	2	0.0445694	0.173127	0.0107216	1	3.74477	5.89488	0.227736	4.22056	0.904573	0.230682	1	0.650411	0.871446	0.0838015	1.60074	0.583738	0.0793008	1	1.93413	0.96066	0.0948178	0.634461	1.4414	0.0928317
AT1G17650.1	37781	| glyoxylate reductase 2 | Chr1:6069594-6071964 REVERSE LENGTH=358 | 201606	19	19	0.0136888	0.128534	0.0138501	1	0.767375	0.95293	0.933172	0.691812	0.873406	1.26469	1	0.937457	0.835447	0.926952	0.752116	0.95685	0.781672	1	0.599402	0.764365	0.757297	0.829567	0.751746	0.864729
AT1G17720.1	56275	| Protein phosphatase 2A%2C regulatory subunit PR55 | Chr1:6093949-6098065 REVERSE LENGTH=501 | 201606	14	1	0.000969569	0.00671346	0.130968	1	1.35562	1.26602	1.51184	0.809678	1.15912	2.16581	1	1.21431	2.53469	2.37323	2.60477	2.29007	2.12855	1	0.779852	0.959209	1.06316	1.04249	1.00412	1.3957
AT1G17720.2	56176	| Protein phosphatase 2A%2C regulatory subunit PR55 | Chr1:6093949-6098065 REVERSE LENGTH=500 | 201606	14	1	0.00538995	0.0246694	0.191004	1	1.3817	1.34288	1.71224	0.793015	1.33617	2.2958	1	1.09913	2.01948	2.04217	2.03282	1.86982	1.73716	1	0.926906	0.998407	1.03059	1.04768	1.14876	1.41338
AT1G17745.1	66454	| D-3-phosphoglycerate dehydrogenase | Chr1:6101157-6104979 FORWARD LENGTH=624 | 201606	18	17	1.19529e-05	7.94002e-06	1.64121e-08	1	0.875497	1.55133	2.04549	2.06614	1.80439	3.77558	1	0.735379	4.04584	3.50919	6.63697	2.88887	3.6061	1	0.905078	4.67264	3.50655	5.68571	3.43906	3.72766
AT1G17840.1	78412	| white-brown complex-like protein | Chr1:6142870-6145894 FORWARD LENGTH=703 | 201606	8	8	0.00742299	0.000360386	0.603947	1	1.34194	1.24432	0.510252	0.215123	0.557692	0.0194439	1	0.0769112	0.565979	0.117183	0.179188	0.815952	0.3789	1	0.84773	1.37119	0.594552	0.679286	0.23528	0.138875
AT1G17860.1	22082	| Kunitz family trypsin and protease inhibitor protein | Chr1:6149343-6149933 FORWARD LENGTH=196 | 201606	6	6	0.0196731	0.0286802	0.0192724	1	1.55784	0.334149	0.670926	0.987186	1.06885	1.47183	1	1.16643	0.634352	1.15908	1.64189	0.705915	1.39275	1	1.54341	0.761188	2.08717	2.52872	4.20332	2.7987
AT1G17880.1	17946	| basic transcription factor 3 | Chr1:6152572-6153425 REVERSE LENGTH=165 | 201606	12	11	0.0145824	0.000162456	0.00143551	1	0.700152	0.810521	0.756774	0.729985	0.62687	1.03384	1	1.13857	1.24722	0.805071	0.753627	0.749426	0.761694	1	1.34568	1.11582	0.999871	0.886508	0.887276	1.02856
AT1G17890.1	36227	| NAD(P)-binding Rossmann-fold superfamily protein | Chr1:6154478-6155596 REVERSE LENGTH=328 | 201606	13	11	0.854669	0.575774	0.000871774	1	0.927818	1.16805	1.00091	0.943551	0.89471	0.86314	1	1.00485	1.2689	0.841238	1.08173	0.990207	1.12167	1	2.09236	2.16651	2.75151	2.26166	2.24389	1.70158
AT1G18060.1	25198	| microbial collagenase | Chr1:6212065-6213314 REVERSE LENGTH=226 | 201606	8	8	0.00131073	0.0662401	0.0493151	1	1.02444	0.911826	0.987346	0.840532	0.735026	0.136026	1	0.720456	0.647651	0.447694	0.427322	0.767599	0.332432	1	0.880663	0.644304	0.743585	0.711317	0.378396	0.281493
AT1G18070.1	59243	| Translation elongation factor EF1A/initiation factor IF2gamma family protein | Chr1:6214236-6218211 REVERSE LENGTH=532 | 201606	20	20	0.00138142	0.000388123	0.0150697	1	0.987848	0.915436	0.974896	1.0303	0.684968	0.569676	1	0.935773	0.811014	1.01746	0.85265	0.696229	0.543091	1	1.05953	0.959968	0.947547	0.829682	0.676621	0.704144
AT1G18080.1	35748	| Transducin/WD40 repeat-like superfamily protein | Chr1:6222325-6223901 FORWARD LENGTH=327 | 201606	46	42	0.00495114	0.000253827	0.0170356	1	1.01268	1.03421	1.00634	1.0087	0.835153	0.663778	1	0.904093	1.00523	0.868317	0.924532	0.749566	0.657559	1	1.06882	0.88044	0.973889	1.05623	0.907759	0.80217
AT1G18150.1	66232	| Protein kinase superfamily protein | Chr1:6244641-6247582 REVERSE LENGTH=589 | 201606	9	5	0.000278921	0.0991464	0.024207	1	2.06163	1.08915	0.615668	0.557321	1.08176	0.852382	1	1.11158	0.819873	0.466382	0.830779	0.898358	0.660127	1	1.11561	0.736985	0.445489	0.936613	0.734856	0.749115
AT1G18170.1	26529	| FKBP-like peptidyl-prolyl cis-trans isomerase family protein | Chr1:6254291-6255507 FORWARD LENGTH=247 | 201606	14	14	0.0120303	0.00013068	0.114934	1	1.29058	1.38037	1.57851	1.03837	2.07761	2.05467	1	0.853442	0.757317	1.46742	0.961155	1.96486	1.27678	1	1.44575	1.71994	1.50873	1.68371	2.04952	1.77089
AT1G18210.1	18350	| Calcium-binding EF-hand family protein | Chr1:6268273-6268785 REVERSE LENGTH=170 | 201606	4	4	0.000647039	2.18385e-05	0.000238866	1	1.53932	0.968	0.033226	1.11048	0.0321408	0.0336558	1	0.683298	0.547578	0.0232115	0.383909	0.022352	0.0219649	1	0.274646	0.837036	0.0202332	0.707094	0.0185586	0.0198093
AT1G18270.1	147042	| ketose-bisphosphate aldolase class-II family protein | Chr1:6283634-6293772 REVERSE LENGTH=1373 | 201606	33	33	0.000587586	0.00033789	0.0015332	1	1.77192	1.58361	1.22151	1.11783	1.83177	0.450679	1	0.775629	1.57359	1.68941	2.08326	2.15739	1.92133	1	1.41879	2.07973	2.43039	1.89399	2.41948	1.30527
AT1G18270.4	140723	| ketose-bisphosphate aldolase class-II family protein | Chr1:6283964-6293772 REVERSE LENGTH=1314 | 201606	28	28	1.46401e-20	1.91645e-07	6.89655e-09	1	177.465	0.866903	0.891703	0.99196	0.862579	0.903238	1	83.1101	0.846091	0.838015	0.825627	0.806983	0.793008	1	151.089	0.967021	0.948178	0.903506	0.869703	0.928317
AT1G18440.1	31562	| Peptidyl-tRNA hydrolase family protein | Chr1:6345994-6347686 FORWARD LENGTH=288 | 201606	2	2	0.537342	0.408011	0.845575	1	0.535453	0.710403	1.07725	0.793907	0.520214	1.08947	1	1.12907	0.828534	0.43038	0.61121	0.793407	0.587062	1	1.28448	1.67589	1.27794	0.903506	1.16771	1.24027
AT1G18450.1	48937	| actin-related protein 4 | Chr1:6348199-6351766 FORWARD LENGTH=441 | 201606	15	15	0.00123006	0.010034	0.0667828	1	2.38564	1.05213	1.26494	1.78192	1.50243	1.76229	1	1.5748	1.07798	1.21276	1.0351	1.76379	2.03262	1	1.23507	0.910321	0.738048	0.961377	0.949875	1.2772
AT1G18500.1	68676	| methylthioalkylmalate synthase-like 4 | Chr1:6369347-6372861 FORWARD LENGTH=631 | 201606	24	11	1.44877e-06	0.000280806	0.000158834	1	0.636712	0.480514	0.686547	0.710587	0.292767	0.480637	1	0.784855	0.526217	0.64685	0.535532	0.427964	0.421144	1	0.597291	0.399123	0.655853	0.583135	0.42877	0.606692
AT1G18540.1	26153	| Ribosomal protein L6 family protein | Chr1:6377448-6378548 REVERSE LENGTH=233 | 201606	19	8	0.00142584	0.00603759	0.549616	1	1.12159	0.99155	0.864365	0.630997	0.625798	0.312903	1	0.578172	0.978454	0.754942	0.869757	0.853215	0.635341	1	0.864471	0.817385	0.722231	0.808149	0.821826	0.547861
AT1G18580.1	61879	| galacturonosyltransferase 11 | Chr1:6396144-6398005 FORWARD LENGTH=537 | 201606	2	1	0.0275802	0.00959811	0.0374538	1	1.70787	1.46156	1.07958	1.89531	1.05307	0.0652392	1	1.1438	1.25529	1.66021	1.58276	0.241883	0.0587062	1	0.965456	0.817044	0.961229	0.908311	0.862518	0.0464159
AT1G18590.1	39912	| sulfotransferase 17 | Chr1:6398634-6399674 FORWARD LENGTH=346 | 201606	15	12	0.0487548	0.00417732	0.00664344	1	0.553553	0.611595	0.443722	0.869002	0.996557	1.01114	1	0.811551	0.774809	0.894809	0.744906	0.92374	1.53958	1	0.321719	0.532544	0.56039	0.556776	0.583963	0.596993
AT1G18640.2	32318	| 3-phosphoserine phosphatase | Chr1:6416524-6418245 REVERSE LENGTH=295 | 201606	10	10	0.119104	0.180092	0.652235	1	1.32706	1.13747	0.939278	1.47892	0.914717	1.29581	1	1.9105	1.47856	1.5376	1.65485	1.33933	1.38556	1	0.871485	0.877873	0.944833	1.1157	1.12037	0.925516
AT1G18720.1	23134	| ER membrane protein%2C putative (DUF962) | Chr1:6458020-6459658 REVERSE LENGTH=206 | 201606	1	1	0.0891433	0.00940799	0.060903	1	0.47037	0.649765	0.467216	0.509118	0.45699	0.0677	1	0.894722	2.09682	1.44075	2.12709	2.65603	5.23809	1	2.40178	5.42203	2.3588	2.24767	5.05752	3.07395
AT1G18730.1	20396	| NDH dependent flow 6 | Chr1:6460625-6462107 FORWARD LENGTH=175 | 201606	6	6	1.66031e-06	4.58894e-06	1.15636e-05	1	73.9132	80.9469	86.3111	49.8281	85.9821	39.1552	1	74.1487	64.9563	72.7071	65.545	102.043	55.4289	1	102.92	69.4747	100.741	87.2128	69.3331	58.7894
AT1G18730.5	14963	| NDH dependent flow 6 | Chr1:6460929-6462107 FORWARD LENGTH=128 | 201606	6	6	0.0163098	0.0955351	0.0177131	1	1.49744	1.63994	1.74861	1.00949	1.74195	0.793261	1	0.972342	0.851799	0.953439	0.859519	1.33813	0.726862	1	1.23601	0.834352	1.20984	1.04738	0.83265	0.706027
AT1G19020.1	9155	| CDP-diacylglycerol-glycerol-3-phosphate 3-phosphatidyltransferase | Chr1:6568142-6568402 FORWARD LENGTH=86 | 201606	2	2	1.91932e-05	1.06485e-14	0.00107532	1	0.887847	0.866903	0.891703	0.99196	0.862579	0.903238	1	0.921884	0.846091	0.838015	24.7688	0.806983	0.793008	1	0.965456	9.67021	18.9636	15.2102	0.869703	0.928317
AT1G19130.1	21641	| RmlC-like jelly roll fold protein | Chr1:6609545-6610555 REVERSE LENGTH=192 | 201606	7	7	0.491349	0.152192	0.0035218	1	0.861989	0.962657	1.48155	1.52142	1.06785	1.63371	1	1.60217	0.762013	1.88517	1.60748	1.30747	1.4856	1	1.92323	2.34434	3.02152	1.61421	2.78296	2.77406
AT1G19140.1	34341	| ubiquinone biosynthesis COQ9-like protein | Chr1:6611026-6612414 REVERSE LENGTH=311 | 201606	5	5	0.000768975	0.00911525	0.237367	1	0.382043	0.505768	0.646505	2.28372	1.47748	0.659627	1	1.02838	0.434618	0.424935	0.849018	0.902677	1.20987	1	0.760379	0.425385	0.470416	0.519509	0.434356	0.599946
AT1G19150.1	29939	| PSI type II chlorophyll a/b-binding protein (Lhca2-1) | Chr1:6612806-6613799 FORWARD LENGTH=270 | 201606	6	6	0.00350976	0.180163	0.0282577	1	5.86704	3.81674	4.11239	2.18271	3.58996	1.76883	1	1.34333	0.794626	1.21804	0.9465	1.7592	0.742924	1	0.768173	0.854651	0.886936	0.316267	0.43109	0.23063
AT1G19350.1	36486	| Brassinosteroid signaling positive regulator (BZR1) family protein | Chr1:6688841-6690165 FORWARD LENGTH=335 | 201606	3	3	2.74345e-05	0.0203971	2.12242e-05	1	2.37366	0.0866903	0.0891703	0.099196	0.0862579	0.0903238	1	15.6937	0.846091	0.838015	0.825627	0.806983	0.793008	1	0.0727663	0.0728843	0.0714641	0.0680971	0.0655494	0.0699671
AT1G19360.1	48251	| Nucleotide-diphospho-sugar transferase family protein | Chr1:6690672-6692211 REVERSE LENGTH=428 | 201606	4	4	0.0254469	0.149308	0.0108267	1	1.00964	0.496057	0.270989	0.303362	0.255035	0.15505	1	0.619592	0.572665	0.711296	1.34437	0.681168	0.40158	1	1.76949	0.632807	1.86824	0.451267	1.73312	0.342399
AT1G19450.1	52787	| Major facilitator superfamily protein | Chr1:6731671-6734633 REVERSE LENGTH=488 | 201606	5	2	1.21819e-06	0.157543	0.0185682	1	1.9203	1.58894	0.891703	1.152	1.72369	0.0451619	1	0.920892	0.713631	1.05227	0.803684	1.02269	0.0333745	1	0.550065	0.960183	1.34074	1.41743	0.858467	0.0396744
AT1G19550.1	17061	| Glutathione S-transferase family protein | Chr1:6767451-6767983 REVERSE LENGTH=153 | 201606	12	1	1.38975e-11	6.79459e-10	1.52854e-20	1	0.00458663	0.00447843	0.00460655	0.00512448	0.0044561	0.00466615	1	0.00557095	0.00511293	0.00506412	0.00498926	0.0048766	0.00479215	1	0.00396727	0.0039737	0.00389627	0.0037127	0.0035738	0.00381466
AT1G19570.1	23641	| dehydroascorbate reductase | Chr1:6773462-6774413 REVERSE LENGTH=213 | 201606	32	30	8.10236e-06	2.45171e-05	3.18665e-07	1	0.710215	0.734652	0.834429	0.974762	1.12487	1.44552	1	0.911947	1.10487	1.12473	1.13497	1.43067	1.64413	1	0.668299	0.762137	0.837015	1.22484	0.757164	1.12572
AT1G19580.1	29971	| gamma carbonic anhydrase 1 | Chr1:6774937-6777092 FORWARD LENGTH=275 | 201606	9	7	0.000173516	0.167414	0.124046	1	1.05644	0.436625	1.00284	0.620798	1.13373	1.64233	1	1.09823	0.863963	1.25149	0.782347	1.44902	1.2819	1	0.839139	0.668141	1.0217	0.745706	0.67819	1.05028
AT1G19670.1	34855	| chlorophyllase 1 | Chr1:6803796-6804923 REVERSE LENGTH=324 | 201606	23	23	2.93397e-05	4.28547e-10	7.85957e-08	1	0.687548	0.413528	0.528103	1.09004	1.26523	0.593925	1	0.629359	0.662871	1.0477	1.71994	2.06413	2.91194	1	0.338928	0.451576	1.009	1.36702	1.07683	1.3048
AT1G19740.1	31371	| ATP-dependent protease La (LON) domain protein | Chr1:6824396-6825232 FORWARD LENGTH=278 | 201606	4	3	0.114944	0.0005639	0.177858	1	0.891273	1.0449	0.536186	0.889787	0.345096	0.634517	1	0.861687	0.54596	0.421837	0.35517	0.519751	0.290838	1	0.841662	0.393346	1.05994	0.787799	0.649027	0.692806
AT1G19870.1	86882	| IQ-domain 32 | Chr1:6895400-6898539 REVERSE LENGTH=794 | 201606	8	8	0.292417	0.00399615	0.13274	1	1.25518	1.44707	1.63851	0.99341	1.29373	1.66174	1	2.26454	3.28712	2.40962	1.56205	2.90848	2.38747	1	1.56116	1.03505	1.09426	1.11706	0.933382	0.857103
AT1G19890.1	15725	| male-gamete-specific histone H3 | Chr1:6905034-6905792 FORWARD LENGTH=137 | 201606	15	1	9.93266e-11	1.46741e-06	2.49413e-10	1	0.887847	0.866903	0.891703	0.99196	94.9921	0.903238	1	0.921884	0.846091	0.838015	0.825627	99.8756	0.793008	1	0.965456	0.967021	0.948178	0.903506	107.4	0.928317
AT1G19910.1	16643	| ATPase%2C F0/V0 complex%2C subunit C protein | Chr1:6913317-6914322 FORWARD LENGTH=165 | 201606	5	5	0.01584	1.73582e-05	0.00922552	1	0.883234	0.0144299	0.848321	0.491514	0.857862	0.55123	1	0.640055	0.0195604	1.09563	1.07541	2.11445	1.52959	1	1.36346	0.0292212	2.18579	1.81632	2.88417	2.14656
AT1G19920.1	53638	| Pseudouridine synthase/archaeosine transglycosylase-like family protein | Chr1:6914835-6916657 REVERSE LENGTH=476 | 201606	23	18	0.00094669	1.15719e-07	1.23688e-05	1	0.905105	0.718615	0.849982	0.741674	0.414049	0.830358	1	0.956736	0.680581	0.648687	0.541056	0.436249	0.331139	1	0.710247	0.71333	0.54624	0.698981	0.321361	0.52584
AT1G20010.1	50343	| tubulin beta-5 chain | Chr1:6938033-6940481 REVERSE LENGTH=449 | 201606	39	9	7.71291e-05	0.105128	3.84887e-05	1	1.26002	1.1535	1.54148	1.5192	1.15251	1.86756	1	1.07989	0.860659	1.16134	0.862316	0.870824	1.07211	1	1.48312	1.63697	1.93727	1.03924	1.77123	3.15526
AT1G20020.1	41168	| ferredoxin-NADP[+]-oxidoreductase 2 | Chr1:6942851-6944868 FORWARD LENGTH=369 | 201606	101	91	0.000295321	0.00882904	0.0522329	1	1.19062	1.30431	1.22801	1.14995	1.3847	1.59335	1	1.11034	1.14459	1.18601	0.870921	1.11459	1.10243	1	1.03763	0.894027	0.890898	0.994746	0.919857	0.945639
AT1G20050.1	25146	| C-8%2C7 sterol isomerase | Chr1:6949160-6950135 FORWARD LENGTH=223 | 201606	3	3	0.525403	0.651467	0.466278	1	1.18728	1.06176	0.693858	0.876143	0.858963	0.702602	1	1.46578	1.09135	0.964063	1.41252	1.51444	1.26724	1	1.07373	1.24459	1.26054	1.60869	1.44324	0.824334
AT1G20110.1	65396	| RING/FYVE/PHD zinc finger superfamily protein | Chr1:6971554-6974578 FORWARD LENGTH=601 | 201606	9	9	0.0188555	0.00363621	0.044183	1	2.22773	2.83061	2.56438	1.23576	2.49681	2.26696	1	2.46385	3.14343	3.1188	1.61298	3.27362	4.13526	1	2.03715	2.20591	1.80275	1.90734	2.44008	2.33742
AT1G20200.1	55582	| PAM domain (PCI/PINT associated module) protein | Chr1:7001409-7004154 REVERSE LENGTH=488 | 201606	25	13	0.000242662	4.84981e-05	0.00657404	1	1.11816	0.951966	0.848337	0.796765	0.803111	0.36417	1	0.841298	1.04677	0.813086	1.42529	1.24001	0.918075	1	1.16222	1.0464	1.28193	0.950653	1.13661	0.626758
AT1G20220.1	33763	| Alba DNA/RNA-binding protein | Chr1:7005090-7007285 REVERSE LENGTH=315 | 201606	6	5	0.000154574	0.0727154	0.25064	1	1.77519	0.97541	1.67127	1.37231	1.08552	0.135334	1	0.933294	0.559595	1.39836	0.674605	0.604105	0.330156	1	0.698476	0.794897	1.11019	0.813396	1.10271	0.343126
AT1G20225.1	26052	| Thioredoxin superfamily protein | Chr1:7007966-7009318 REVERSE LENGTH=233 | 201606	8	8	0.384355	0.00429376	2.22177e-05	1	1.5642	1.61597	1.57678	1.54798	2.19612	1.86527	1	1.33914	2.21126	1.94769	1.67904	2.18681	3.37143	1	1.20747	1.8496	2.05305	1.28362	3.12153	1.78119
AT1G20260.1	54312	| ATPase%2C V1 complex%2C subunit B protein | Chr1:7016971-7020290 FORWARD LENGTH=487 | 201606	79	3	3.02967e-06	0.000425386	2.08077e-05	1	1.36261	1.27368	1.33651	1.35109	1.63411	1.56695	1	1.12321	1.10361	1.25033	1.29179	1.46049	1.4723	1	0.902214	1.0016	1.11124	1.11601	1.4035	1.10482
AT1G20330.1	40450	| sterol methyltransferase 2 | Chr1:7038968-7040053 REVERSE LENGTH=361 | 201606	13	12	7.48925e-06	2.01993e-05	4.8775e-05	1	1.17797	0.796034	0.602164	0.482285	0.350902	0.128906	1	0.805928	0.863603	0.472106	0.370067	0.289743	0.124682	1	0.893373	0.354578	0.467342	0.565212	0.345701	0.184934
AT1G20340.1	16984	| Cupredoxin superfamily protein | Chr1:7042770-7043273 REVERSE LENGTH=167 | 201606	60	58	1.39147e-06	0.00441952	0.0185116	1	0.836924	0.794311	0.844944	0.862852	0.891037	1.297	1	1.00816	0.897658	0.906479	0.740132	0.877399	0.818003	1	1.06888	0.989953	1.01491	1.02322	0.898374	1.07393
AT1G20440.1	29897	| cold-regulated 47 | Chr1:7084722-7085664 REVERSE LENGTH=265 | 201606	14	11	0.00092958	0.0198339	0.00214799	1	2.52097	2.88839	2.63532	2.09344	3.19744	3.87071	1	1.26755	1.69465	2.76791	2.6317	2.43357	2.30754	1	1.65865	3.37503	2.76655	2.01909	2.87902	2.07917
AT1G20450.1	29548	| Dehydrin family protein | Chr1:7088235-7089107 REVERSE LENGTH=260 | 201606	15	14	1.16302e-06	5.12546e-06	0.0118115	1	1.6054	1.6997	1.88574	1.81991	2.87555	4.30948	1	0.802121	1.51585	1.89513	2.20231	2.15044	2.04887	1	1.11204	1.97649	1.82597	1.50437	1.7813	1.71185
AT1G20510.1	59375	| OPC-8:0 CoA ligase1 | Chr1:7103645-7105856 REVERSE LENGTH=546 | 201606	17	17	0.00117093	0.00521735	0.0205314	1	0.750781	0.617675	0.542261	1.04663	0.634004	0.404815	1	0.86586	1.08804	1.41122	1.99245	1.6796	1.45118	1	0.650806	0.764021	1.05448	1.14001	1.07683	0.847694
AT1G20510.2	51223	| OPC-8:0 CoA ligase1 | Chr1:7103939-7105856 REVERSE LENGTH=473 | 201606	9	9	1.50186e-09	8.95045e-08	2.05149e-17	1	94.8621	0.866903	0.891703	0.99196	0.862579	0.903238	1	80.4096	0.846091	0.838015	0.825627	0.806983	0.793008	1	99.7617	0.967021	0.948178	0.903506	0.869703	0.928317
AT1G20560.1	61074	| acyl activating enzyme 1 | Chr1:7119927-7121730 REVERSE LENGTH=556 | 201606	3	3	0.108454	0.00333528	0.161146	1	0.887847	3.47444	0.891703	0.99196	8.75621	0.903238	1	0.134725	0.857384	0.849603	1.57448	3.53201	1.15891	1	0.0580789	0.946417	0.40412	0.903187	0.205884	0.389554
AT1G20560.2	52604	| acyl activating enzyme 1 | Chr1:7119927-7121363 REVERSE LENGTH=478 | 201606	2	2	0.0478758	0.00102926	0.040584	1	0.887847	0.866903	0.891703	0.99196	8.75621	0.903238	1	0.134725	0.123648	0.849603	1.57448	3.53201	1.15891	1	0.0580789	0.0581731	0.40412	0.903187	0.205884	0.389554
AT1G20575.1	27676	| Nucleotide-diphospho-sugar transferases superfamily protein | Chr1:7126987-7128677 REVERSE LENGTH=246 | 201606	2	2	0.321769	0.000206131	0.0308481	1	0.940544	0.0853035	0.0877438	0.0976091	0.084878	0.0888789	1	0.948184	0.222211	0.22009	4.33672	0.858116	0.208269	1	1.68173	0.240568	3.86965	0.224767	1.49635	0.230939
AT1G20580.1	14238	| Small nuclear ribonucleoprotein family protein | Chr1:7128979-7130371 FORWARD LENGTH=131 | 201606	6	4	0.515974	0.0525033	0.544843	1	1.33472	1.30542	1.42143	0.992134	0.86653	0.903241	1	1.57923	2.07913	1.23403	0.991986	1.19117	1.9395	1	1.4499	1.2357	1.33292	0.996275	1.82978	1.11129
AT1G20620.1	56695	| catalase 3 | Chr1:7143142-7146193 FORWARD LENGTH=492 | 201606	72	53	0.00125832	8.08699e-06	1.26448e-08	1	0.9807	0.921885	1.05149	0.966343	1.2163	1.08025	1	0.97742	1.18264	1.43953	1.22196	1.60854	1.70457	1	0.784192	0.984215	1.22298	1.05044	1.29452	1.43223
AT1G20630.1	56762	| catalase 1 | Chr1:7146812-7149609 FORWARD LENGTH=492 | 201606	34	9	0.00194256	0.00384292	0.451294	1	0.766102	0.886563	0.958306	0.880344	0.70945	0.764449	1	0.896204	1.01569	1.13254	0.980152	0.811409	0.917167	1	0.922459	0.896318	1.04606	1.01081	1.05913	0.979291
AT1G20693.1	15982	| high mobility group B2 | Chr1:7177282-7178487 FORWARD LENGTH=144 | 201606	2	1	0.00220041	0.000514376	0.000395996	1	0.887847	9.00476	0.891703	0.99196	0.862579	18.0449	1	0.921884	13.9229	0.838015	0.825627	8.42077	26.5758	1	0.965456	6.66618	0.948178	0.903506	35.0313	15.493
AT1G20696.1	15681	| high mobility group B3 | Chr1:7179825-7181174 FORWARD LENGTH=141 | 201606	2	1	0.00128381	0.000303668	9.06033e-06	1	0.226751	0.221402	0.227736	0.253341	0.220298	3.07134	1	0.921884	0.846091	3.40456	0.825627	5.68701	21.168	1	0.965456	0.967021	0.948178	0.903506	29.1154	12.4027
AT1G20696.2	16886	| high mobility group B3 | Chr1:7179825-7181193 FORWARD LENGTH=147 | 201606	2	1	3.32792e-05	0.000303668	9.06033e-06	1	0.887847	0.866903	0.891703	0.99196	0.862579	12.0258	1	0.921884	0.846091	3.40456	0.825627	5.68701	21.168	1	0.965456	0.967021	0.948178	0.903506	29.1154	12.4027
AT1G20760.1	109818	| Calcium-binding EF hand family protein | Chr1:7209515-7214773 FORWARD LENGTH=1019 | 201606	14	13	0.0201694	0.0088322	0.323173	1	1.12294	1.01919	0.81822	0.957329	1.2819	1.57675	1	1.10788	1.41996	1.22972	1.92208	1.62308	1.65007	1	1.29814	1.24848	1.36141	1.21799	1.21182	1.71328
AT1G20810.1	25530	| FKBP-like peptidyl-prolyl cis-trans isomerase family protein | Chr1:7232025-7233367 FORWARD LENGTH=232 | 201606	5	5	0.0640979	0.0323553	0.135146	1	0.889559	0.33511	0.882117	0.263331	1.08441	1.01866	1	2.16377	0.253988	1.40496	0.246821	1.02269	1.11293	1	1.14115	0.70061	0.868772	0.492232	0.392639	0.759882
AT1G20810.2	25477	| FKBP-like peptidyl-prolyl cis-trans isomerase family protein | Chr1:7232025-7233235 FORWARD LENGTH=229 | 201606	4	4	5.01729e-05	0.00151464	0.000310788	1	23.6456	8.90763	0.891703	6.99966	0.862579	27.0773	1	51.4132	6.03499	0.838015	5.86469	0.806983	26.4442	1	41.8923	25.7198	0.948178	18.0701	0.869703	27.8957
AT1G20816.1	19782	| outer envelope pore-like protein | Chr1:7233814-7234941 FORWARD LENGTH=167 | 201606	5	5	0.6411	0.721974	0.083013	1	1.62937	1.00789	1.18862	0.974519	1.29431	0.748086	1	1.05969	0.725382	0.964063	1.14531	0.581809	1.14596	1	0.854447	0.321635	0.519652	1.10532	0.480885	1.33783
AT1G20840.1	79485	| tonoplast monosaccharide transporter1 | Chr1:7245107-7247674 REVERSE LENGTH=734 | 201606	9	9	0.0258577	0.00394928	0.0398193	1	1.2354	1.04098	0.332198	0.365483	0.879934	0.0250774	1	1.62254	2.34626	3.61506	6.81406	5.14774	2.63683	1	3.29552	4.84459	3.90253	5.25523	4.72583	0.575269
AT1G20880.1	29897	| RNA-binding (RRM/RBD/RNP motifs) family protein | Chr1:7262879-7264834 REVERSE LENGTH=274 | 201606	3	3	1.21908e-05	5.03609e-05	3.79045e-06	1	0.887847	0.866903	20.8157	16.6385	34.5032	30.1549	1	0.921884	0.846091	39.2491	34.8038	32.2793	37.0781	1	0.965456	0.967021	28.4454	18.0555	37.7682	21.6688
AT1G20950.1	67119	| Phosphofructokinase family protein | Chr1:7297467-7301336 REVERSE LENGTH=614 | 201606	31	20	1.01325e-05	0.03693	0.0121781	1	1.06985	0.893616	0.736916	0.640255	0.570904	0.293557	1	0.886655	0.931107	0.752595	0.801537	0.662072	0.573474	1	0.854954	0.666015	0.667706	0.718113	0.522603	0.558921
AT1G20960.1	247102	| U5 small nuclear ribonucleoprotein helicase | Chr1:7302591-7309914 REVERSE LENGTH=2171 | 201606	14	14	0.0677206	0.063887	2.49959e-06	1	5.12809	3.58351	5.23419	4.15173	7.19256	2.25381	1	1.07587	0.619394	2.4856	1.53509	3.95999	4.35034	1	0.965456	18.6053	19.2246	6.58335	167.317	49.3968
AT1G21065.1	23708	| secondary thiamine-phosphate synthase enzyme | Chr1:7374210-7375644 FORWARD LENGTH=217 | 201606	7	7	0.00801311	0.162962	0.261123	1	0.514194	0.960026	0.889138	0.996779	0.910362	0.904305	1	0.52693	0.759041	0.793777	0.516244	0.638586	0.459025	1	0.658962	0.505511	0.749227	0.711886	0.823777	0.827798
AT1G21080.1	43924	| DNAJ heat shock N-terminal domain-containing protein | Chr1:7378822-7382275 REVERSE LENGTH=391 | 201606	11	11	0.162228	0.415467	0.400479	1	0.980042	0.741388	0.889025	0.81206	1.01478	0.578588	1	1.13603	0.905643	0.796901	0.902646	0.690057	0.72662	1	1.19775	1.3307	1.17599	0.994622	1.04763	0.832708
AT1G21080.2	34399	| DNAJ heat shock N-terminal domain-containing protein | Chr1:7378822-7380927 REVERSE LENGTH=304 | 201606	11	10	2.17786e-12	7.38986e-07	1.28899e-14	1	91.5791	0.866903	0.891703	0.99196	0.862579	0.903238	1	119.5	0.846091	0.838015	0.825627	0.806983	0.793008	1	115.887	0.967021	0.948178	0.903506	0.869703	0.928317
AT1G21100.1	40869	| O-methyltransferase family protein | Chr1:7386991-7388318 REVERSE LENGTH=373 | 201606	11	1	1.34531e-25	1.05318e-10	2.3213e-11	1	0.887847	26.0071	0.891703	0.99196	0.862579	0.903238	1	0.921884	95.7191	0.838015	0.825627	0.806983	0.793008	1	0.965456	140.128	0.948178	0.903506	0.869703	0.928317
AT1G21130.1	40748	| O-methyltransferase family protein | Chr1:7399170-7400470 REVERSE LENGTH=373 | 201606	14	13	4.85207e-06	9.87753e-07	8.8315e-08	1	2.66332	1.15587	1.18043	0.342777	0.862579	0.319476	1	2.86868	3.89013	3.26611	6.18394	2.34451	1.1052	1	4.03842	4.30275	3.5964	2.39757	1.49799	1.17027
AT1G21170.1	122673	| Exocyst complex component SEC5 | Chr1:7413050-7419411 FORWARD LENGTH=1090 | 201606	7	1	0.0018287	0.000734979	3.42918e-05	1	0.887847	0.866903	0.891703	29.8461	0.862579	0.903238	1	0.921884	0.846091	0.838015	29.1996	0.806983	0.793008	1	0.965456	0.967021	0.948178	30.0654	0.869703	0.928317
AT1G21230.1	82206	| wall associated kinase 5 | Chr1:7429980-7432346 FORWARD LENGTH=733 | 201606	4	1	2.53664e-06	2.25492e-05	0.000166863	1	0.887847	0.866903	0.891703	9.9196	11.4355	0.903238	1	0.921884	0.846091	0.838015	13.4921	5.65019	0.793008	1	0.965456	0.967021	0.948178	18.1516	37.6798	0.928317
AT1G21240.1	82701	| wall associated kinase 3 | Chr1:7434303-7436702 FORWARD LENGTH=741 | 201606	6	2	0.000423082	3.45995e-05	3.9925e-05	1	0.887847	0.866903	8.91703	6.79254	17.0843	0.903238	1	0.921884	0.846091	19.337	35.1721	5.65019	0.793008	1	0.965456	0.967021	25.2978	21.1556	57.667	0.928317
AT1G21250.1	81211	| cell wall-associated kinase | Chr1:7439512-7441892 FORWARD LENGTH=735 | 201606	10	6	0.000907749	9.51526e-08	1.88614e-05	1	0.450745	0.875316	0.576058	0.563037	1.61034	1.95192	1	0.211793	1.97812	2.2323	5.03125	1.16937	1.32663	1	0.21451	0.948861	1.73898	2.01174	2.54986	1.54545
AT1G21270.1	81644	| wall-associated kinase 2 | Chr1:7444997-7447345 FORWARD LENGTH=732 | 201606	5	1	0.00181331	6.43624e-05	7.25107e-05	1	0.0380782	0.0371799	0.506265	0.567738	0.860392	0.0387383	1	0.0401101	0.0368124	1.08785	1.53029	0.361026	0.0345028	1	0.0484846	0.0485632	1.7335	1.81903	3.18311	0.0466195
AT1G21350.2	24822	| Thioredoxin superfamily protein | Chr1:7477376-7479012 REVERSE LENGTH=225 | 201606	6	6	3.07345e-07	4.22849e-05	1.71625e-06	1	44.1902	52.0425	41.6698	62.7619	0.862579	0.903238	1	24.6694	42.2226	50.306	41.2814	0.806983	0.793008	1	38.5861	29.0106	37.5552	36.1402	0.869703	0.928317
AT1G21350.3	28089	| Thioredoxin superfamily protein | Chr1:7477376-7479012 REVERSE LENGTH=252 | 201606	6	6	4.16948e-06	9.06489e-05	1.83645e-05	1	1.10194	1.29774	1.03909	1.56504	0.0215094	0.0225233	1	0.572116	0.979198	1.16666	0.95737	0.018715	0.0183909	1	0.892239	0.670823	0.868402	0.835683	0.0201104	0.0214658
AT1G21380.1	55791	| Target of Myb protein 1 | Chr1:7485806-7488032 REVERSE LENGTH=506 | 201606	6	5	0.259963	0.612242	0.00724149	1	0.760458	1.01691	0.904534	0.66195	1.17077	1.67079	1	0.770861	1.27357	1.27311	1.51597	1.23056	1.59552	1	0.659642	1.52899	3.98254	3.51061	4.48655	4.22764
AT1G21400.1	53488	| Thiamin diphosphate-binding fold (THDP-binding) superfamily protein | Chr1:7493492-7496240 FORWARD LENGTH=472 | 201606	4	4	0.000765581	3.95084e-05	0.0154882	1	0.887847	11.5663	6.2335	0.99196	0.862579	0.903238	1	0.921884	16.8052	30.6063	0.825627	0.806983	0.793008	1	0.965456	18.4785	25.1477	0.903506	0.869703	0.928317
AT1G21400.3	44972	| Thiamin diphosphate-binding fold (THDP-binding) superfamily protein | Chr1:7494169-7496240 FORWARD LENGTH=397 | 201606	3	3	0.000385568	8.2255e-05	0.0305234	1	0.887847	11.5663	6.2335	0.99196	8.62579	0.903238	1	0.921884	16.8052	30.6063	0.825627	5.60944	0.793008	1	0.965456	18.4785	25.1477	0.903506	9.12437	0.928317
AT1G21440.1	36307	| Phosphoenolpyruvate carboxylase family protein | Chr1:7502325-7504103 REVERSE LENGTH=336 | 201606	10	8	0.225664	0.000813846	0.00544434	1	1.04451	0.626913	0.804397	1.15696	0.929578	1.06185	1	0.565624	0.57035	0.569528	0.588966	1.09292	0.742737	1	0.449744	0.734822	0.659245	0.480139	0.606519	1.20437
AT1G21600.1	37377	| plastid transcriptionally active 6 | Chr1:7571514-7573782 REVERSE LENGTH=328 | 201606	3	3	0.432941	0.215147	0.13119	1	1.00945	0.980341	1.00372	0.981399	0.48743	1.15204	1	0.619812	0.660661	0.568047	0.379085	0.450661	0.456406	1	1.92239	1.21211	0.935828	0.89781	0.872936	1.38922
AT1G21630.1	131851	| Calcium-binding EF hand family protein | Chr1:7581457-7587796 FORWARD LENGTH=1218 | 201606	15	15	0.0315065	0.705047	0.0541563	1	0.972585	0.823022	1.2852	1.29063	1.12032	1.85074	1	1.38355	1.33705	1.00542	1.06204	1.21689	1.43761	1	1.3259	1.25797	1.59593	1.06677	1.69037	1.79762
AT1G21640.1	109188	| NAD kinase 2 | Chr1:7588726-7592669 FORWARD LENGTH=985 | 201606	8	8	0.197227	0.174687	0.31364	1	0.4636	1.68016	2.37408	0.956124	1.45495	1.31262	1	0.566299	1.68408	0.941779	0.896587	0.59874	0.878282	1	0.492017	1.23721	1.17112	1.01978	1.62374	1.15711
AT1G21640.2	110903	| NAD kinase 2 | Chr1:7588726-7592669 FORWARD LENGTH=999 | 201606	8	8	0.0511355	0.171469	0.0143591	1	0.4636	0.0629648	2.37408	0.956124	1.45495	1.31262	1	0.566299	0.0314761	0.941779	0.896587	0.59874	0.878282	1	0.492017	0.0361454	1.17112	1.01978	1.62374	1.15711
AT1G21670.1	77289	| DPP6 amino-terminal domain protein | Chr1:7610409-7612520 FORWARD LENGTH=703 | 201606	13	12	0.000731864	4.36025e-07	0.00397639	1	2.15552	0.486296	0.838007	1.34944	0.590752	0.507629	1	2.1871	0.420505	0.627859	0.552588	0.401355	0.494209	1	3.13588	0.98117	1.18586	1.57718	2.17128	1.47314
AT1G21680.1	78442	| DPP6 N-terminal domain-like protein | Chr1:7613028-7615148 FORWARD LENGTH=706 | 201606	33	33	3.85261e-07	9.27274e-06	5.69425e-05	1	3.75386	3.9739	5.02434	4.54106	5.6825	5.44745	1	1.49018	1.72486	2.00531	1.60497	1.8123	2.52495	1	2.48063	1.82615	3.11681	2.74715	3.70637	3.17334
AT1G21720.1	22798	| proteasome beta subunit C1 | Chr1:7626394-7628070 FORWARD LENGTH=204 | 201606	10	3	0.298637	0.211958	0.000244441	1	0.850199	0.809844	0.703883	0.902719	0.929899	0.712975	1	0.825525	0.989963	0.980991	1.36449	1.14859	1.16399	1	0.941106	1.01618	1.25758	1.27187	1.64588	1.08056
AT1G21750.1	55602	| PDI-like 1-1 | Chr1:7645767-7648514 FORWARD LENGTH=501 | 201606	40	33	5.76289e-07	0.0196023	0.00144773	1	1.01561	1.07764	0.859524	0.854588	1.31299	1.96662	1	1.0724	1.02968	1.36636	1.5137	0.966538	1.31961	1	0.95824	0.766113	1.17185	1.22113	1.59296	1.40073
AT1G21770.1	12561	| Acyl-CoA N-acyltransferases (NAT) superfamily protein | Chr1:7651843-7652249 REVERSE LENGTH=111 | 201606	2	2	0.0031712	2.90465e-07	0.000376347	1	0.887847	6.06149	15.0132	0.99196	0.862579	21.1102	1	0.921884	14.1908	16.7603	0.825627	0.806983	18.5141	1	0.965456	6.97061	15.6659	0.903506	0.869703	18.5202
AT1G22280.1	30722	| phytochrome-associated protein phosphatase type 2C | Chr1:7874236-7875496 FORWARD LENGTH=281 | 201606	13	12	0.000208212	0.0117242	0.00415063	1	0.936075	1.55689	1.60024	1.16793	2.24513	2.07451	1	1.28743	1.30269	2.24321	1.73528	1.34922	2.23901	1	1.42277	1.55392	2.90272	1.93884	3.43522	2.74064
AT1G22280.3	31435	| phytochrome-associated protein phosphatase type 2C | Chr1:7874236-7875496 FORWARD LENGTH=287 | 201606	9	8	4.62553e-06	4.6135e-07	7.50004e-07	1	0.936075	0.0161433	0.0166051	0.0184721	0.0160628	0.01682	1	1.28743	0.0170078	0.0168455	0.0165965	0.0162217	0.0159408	1	1.42277	0.0194335	0.0190548	0.0181571	0.0174778	0.0186557
AT1G22300.1	28915	| general regulatory factor 10 | Chr1:7879146-7881103 REVERSE LENGTH=254 | 201606	35	31	0.171096	0.0536341	0.0589165	1	1.29132	1.00123	0.940692	1.12794	1.12163	0.973491	1	1.18616	1.01716	1.15516	1.28042	1.21618	1.33016	1	1.11513	0.864646	1.09487	0.972226	1.31663	0.977277
AT1G22300.2	28900	| general regulatory factor 10 | Chr1:7879244-7881103 REVERSE LENGTH=254 | 201606	35	32	2.25322e-10	4.25186e-12	1.02684e-13	1	1.29132	0.00252546	0.0025977	0.00288977	0.00251286	0.00263131	1	1.18616	0.00252143	0.00249736	0.00246044	0.00240488	0.00236323	1	1.11513	0.00248065	0.00243232	0.00231772	0.00223101	0.00238137
AT1G22330.1	31981	| RNA-binding (RRM/RBD/RNP motifs) family protein | Chr1:7886693-7889241 FORWARD LENGTH=291 | 201606	4	3	0.309673	0.0168971	0.00140699	1	0.803794	0.707961	0.889785	0.459385	0.618837	0.819998	1	0.900767	0.944283	0.83569	0.206019	0.698919	0.217089	1	0.646095	0.484831	0.636953	1.05789	0.292725	0.394315
AT1G22360.1	54364	| UDP-glucosyl transferase 85A2 | Chr1:7895068-7897527 REVERSE LENGTH=481 | 201606	6	5	0.000298955	0.11453	5.65946e-05	1	0.690658	0.581623	0.795963	0.0331785	0.118466	0.030211	1	1.70488	1.2009	1.20539	0.0508418	1.3222	1.61837	1	0.702536	0.938279	1.62738	0.0245972	0.706396	0.177425
AT1G22360.2	52940	| UDP-glucosyl transferase 85A2 | Chr1:7895068-7897527 REVERSE LENGTH=469 | 201606	6	5	7.55935e-05	0.00634495	1.62376e-06	1	0.690658	0.0289957	0.795963	0.129529	0.118466	0.030211	1	1.70488	0.052102	1.20539	2.54209	1.3222	1.61837	1	0.702536	0.0263263	1.62738	0.327355	0.706396	0.177425
AT1G22370.1	35042	| UDP-glucosyl transferase 85A5 | Chr1:7898116-7899045 REVERSE LENGTH=309 | 201606	4	3	0.0109895	0.00136627	8.51697e-06	1	2.54042	0.123978	1.27525	1.4354	0.12336	0.129174	1	0.915293	0.0501226	0.832093	1.67211	0.0478058	0.0469779	1	2.16088	0.0722908	1.41764	0.267688	0.0650157	0.0693974
AT1G22370.2	53970	| UDP-glucosyl transferase 85A5 | Chr1:7898116-7899879 REVERSE LENGTH=479 | 201606	6	5	0.00844808	0.0193322	0.00843278	1	2.54042	2.49498	1.27525	1.4354	5.72672	0.129174	1	0.915293	0.501226	0.832093	1.67211	2.53935	2.1898	1	2.16088	1.92554	1.41764	0.267688	0.449655	1.1582
AT1G22400.1	55010	| UDP-Glycosyltransferase superfamily protein | Chr1:7903851-7906607 REVERSE LENGTH=489 | 201606	8	7	0.489913	4.36353e-11	4.21617e-05	1	11.7706	11.8333	15.2169	10.0369	5.9465	6.59082	1	0.51836	1.2586	2.81046	18.9666	1.15865	0.463256	1	7.17872	4.92313	12.591	12.7013	30.6799	3.82007
AT1G22410.1	58327	| Class-II DAHP synthetase family protein | Chr1:7912120-7914742 FORWARD LENGTH=527 | 201606	13	9	3.39072e-06	3.108e-06	1.35833e-07	1	0.526678	0.322793	0.348607	0.467095	0.145759	0.336264	1	0.564281	0.521715	0.551282	0.909512	0.115641	0.211233	1	0.416531	0.182643	0.357573	0.904042	0.372765	0.320652
AT1G22430.1	42529	| GroES-like zinc-binding dehydrogenase family protein | Chr1:7919235-7921594 FORWARD LENGTH=388 | 201606	7	7	1.48689e-05	0.0003646	0.402496	1	1.68965	1.74001	0.461197	0.301958	0.688952	0.371123	1	1.93813	1.05585	0.618397	0.836481	0.798935	0.206156	1	1.7714	0.952456	0.62592	1.05371	1.03087	1.54529
AT1G22450.1	21195	| cytochrome C oxidase 6B | Chr1:7925447-7926918 FORWARD LENGTH=191 | 201606	8	8	0.014487	0.206294	0.462289	1	1.13207	1.26239	1.58004	0.995975	1.4505	1.89188	1	1.20537	1.57221	1.40309	1.46421	1.8283	1.72559	1	1.04204	1.09204	1.33527	1.22904	1.39136	1.37278
AT1G22520.1	10357	| MICOS complex subunit Mic10-like protein (DUF543) | Chr1:7953299-7954304 REVERSE LENGTH=99 | 201606	4	2	0.122379	0.209348	0.813113	1	1.19457	0.760877	0.837685	0.696255	0.711486	0.899861	1	0.781683	0.552944	0.714388	0.837578	0.771498	0.877302	1	1.02295	0.853168	0.794092	0.85684	1.01798	1.08606
AT1G22520.2	19992	| MICOS complex subunit Mic10-like protein (DUF543) | Chr1:7952996-7954304 REVERSE LENGTH=179 | 201606	4	2	2.90928e-08	8.6645e-07	8.18181e-07	1	1.19457	0.0152455	0.837685	0.0174448	0.0151695	0.0158845	1	0.781683	0.0127507	0.714388	0.0124424	0.0121614	0.0119508	1	1.02295	0.0161463	0.794092	0.0150858	0.0145214	0.0155001
AT1G22530.1	76008	| PATELLIN 2 | Chr1:7955773-7958326 REVERSE LENGTH=683 | 201606	46	41	0.00367539	0.00280186	0.0067379	1	1.89802	1.51364	1.573	1.5691	1.84755	1.26829	1	1.41574	1.12639	1.62352	1.17968	1.27108	1.4581	1	1.7515	1.81988	1.84801	1.39683	1.34017	1.58923
AT1G22700.1	33662	| Tetratricopeptide repeat (TPR)-like superfamily protein | Chr1:8028323-8029878 REVERSE LENGTH=301 | 201606	7	7	0.000184607	9.76829e-07	0.168929	1	0.691408	1.02846	0.564504	0.337121	0.291248	0.170203	1	0.626079	0.939052	0.268906	0.233553	0.34713	0.142697	1	0.90977	0.915406	0.942432	0.602629	0.288537	0.308768
AT1G22710.1	54547	| sucrose-proton symporter 2 | Chr1:8030911-8032970 REVERSE LENGTH=512 | 201606	7	7	0.00166795	0.00203523	0.0886753	1	1.78321	1.86773	1.2367	0.6819	1.59476	0.286247	1	0.461548	1.15403	0.837244	1.86074	2.32312	1.37707	1	1.52011	1.60939	1.62128	1.35463	2.41324	0.796942
AT1G22730.1	77244	| MA3 domain-containing protein | Chr1:8046511-8048769 FORWARD LENGTH=693 | 201606	4	4	0.00867456	0.182044	0.00607839	1	20.7401	0.866903	0.891703	13.3941	14.304	0.903238	1	12.4784	0.846091	0.838015	13.289	10.8036	0.793008	1	19.3027	0.967021	0.948178	18.0701	3.46222	0.928317
AT1G22740.1	22945	| RAB GTPase homolog G3B | Chr1:8049247-8050494 FORWARD LENGTH=203 | 201606	8	5	0.000817744	0.0979015	0.037334	1	1.78325	0.983784	1.48997	1.64619	1.61214	0.421631	1	1.79436	0.66707	1.26486	1.27743	1.22735	1.08503	1	0.896514	0.768907	0.982178	0.707909	0.556487	0.496816
AT1G22780.1	17545	| Ribosomal protein S13/S18 family | Chr1:8067990-8069163 FORWARD LENGTH=152 | 201606	17	17	0.00235382	0.0987577	0.127937	1	0.865377	0.753729	0.682753	0.873652	0.675851	0.569282	1	0.961849	0.972755	0.703853	1.0772	0.900985	0.964198	1	1.11361	0.947904	0.938769	0.973187	1.04914	0.817428
AT1G22800.1	39366	| S-adenosyl-L-methionine-dependent methyltransferases superfamily protein | Chr1:8072020-8074039 FORWARD LENGTH=355 | 201606	2	2	0.0258697	0.00112981	6.16547e-06	1	0.887847	0.866903	0.891703	0.99196	6.0706	12.3772	1	0.921884	0.846091	0.838015	5.53788	10.7583	15.9918	1	0.965456	0.967021	0.948178	21.0595	14.5135	6.47562
AT1G22840.1	12394	| CYTOCHROME C-1 | Chr1:8079384-8080286 FORWARD LENGTH=114 | 201606	8	5	0.0157849	0.010835	0.00284846	1	1.19274	1.36013	1.63934	1.49026	2.02496	2.32735	1	1.3373	1.84416	1.65399	1.44503	2.05417	2.80696	1	1.11435	1.33684	1.45311	1.49666	1.94515	1.96598
AT1G22850.1	36905	| SNARE associated Golgi protein family | Chr1:8080671-8082816 REVERSE LENGTH=344 | 201606	2	2	0.211404	0.08108	0.362238	1	0.895499	1.5021	0.661927	0.504223	0.640308	0.268363	1	0.0550552	0.67742	0.354582	0.489111	1.28009	0.655303	1	0.235179	1.30655	0.757049	0.22178	0.871684	0.411227
AT1G22920.1	39732	| COP9 signalosome 5A | Chr1:8109882-8111895 REVERSE LENGTH=357 | 201606	10	10	0.278449	0.260785	0.110745	1	0.991603	1.56304	1.05634	0.910428	1.12858	1.29161	1	1.12816	1.912	1.26477	1.38229	1.04893	1.24056	1	0.737681	1.27283	1.05408	1.27429	1.2294	1.41884
AT1G22920.2	39105	| COP9 signalosome 5A | Chr1:8109998-8111895 REVERSE LENGTH=351 | 201606	8	8	8.08419e-07	8.88263e-05	1.27841e-09	1	0.991603	0.0161665	0.016629	0.0184986	0.0160859	0.0168441	1	1.12816	0.0173191	0.0171538	0.0169002	0.0165186	0.0162325	1	0.737681	0.0170519	0.0167196	0.0159319	0.0153358	0.0163694
AT1G22940.1	55813	| thiamin biosynthesis protein | Chr1:8122384-8124908 FORWARD LENGTH=522 | 201606	16	16	0.0534159	0.0209177	0.632066	1	0.919121	1.19001	1.17977	1.43973	1.46609	1.6139	1	1.45152	1.44495	1.7157	1.15977	1.76513	1.84648	1	0.871568	1.01337	1.15182	0.81468	0.920977	1.01353
AT1G23080.1	67588	| Auxin efflux carrier family protein | Chr1:8180768-8183406 REVERSE LENGTH=619 | 201606	3	1	4.43406e-06	8.0028e-06	0.00704599	1	3.52866	3.01804	0.465116	0.0740156	0.865748	0.0673957	1	1.63527	1.71767	0.0638752	0.062931	1.85187	0.0604447	1	0.827371	0.798606	0.284427	0.0386496	0.148105	0.039711
AT1G23080.2	58049	| Auxin efflux carrier family protein | Chr1:8181644-8183406 REVERSE LENGTH=527 | 201606	2	1	0.00111613	1.71295e-06	0.0955123	1	0.887847	0.866903	6.2335	0.99196	11.6028	0.903238	1	0.921884	0.846091	0.838015	0.825627	24.2957	0.793008	1	0.965456	0.967021	6.64901	0.903506	3.46222	0.928317
AT1G23130.1	17860	| Polyketide cyclase/dehydrase and lipid transport superfamily protein | Chr1:8200434-8200997 FORWARD LENGTH=160 | 201606	13	13	0.000261512	0.0103566	0.0262544	1	2.57442	2.04714	2.17969	1.71327	4.41292	4.43727	1	0.960431	1.26538	1.03356	1.05736	1.32692	2.0115	1	1.54759	1.5529	1.06139	0.904898	1.55472	1.48736
AT1G23180.1	91694	| ARM repeat superfamily protein | Chr1:8216125-8219515 FORWARD LENGTH=834 | 201606	6	6	3.31382e-05	4.7337e-06	0.00371782	1	0.578416	0.346798	0.354718	0.0149042	0.345707	0.0947974	1	0.260032	0.319784	0.238571	0.0117522	0.114868	0.0782398	1	0.807061	0.469325	0.564288	0.0226371	0.290074	0.309589
AT1G23180.2	68962	| ARM repeat superfamily protein | Chr1:8216125-8218829 FORWARD LENGTH=630 | 201606	2	2	1.42526e-18	0.01431	0.0165298	1	0.887847	0.866903	0.891703	19.8392	0.862579	0.903238	1	0.921884	0.846091	0.838015	5.53788	0.806983	0.793008	1	0.965456	0.967021	0.948178	6.35775	0.869703	0.928317
AT1G23190.1	63171	| Phosphoglucomutase/phosphomannomutase family protein | Chr1:8219946-8224186 FORWARD LENGTH=583 | 201606	60	39	0.210239	0.0225144	0.0238122	1	1.07137	1.04689	1.11969	1.06311	1.05301	0.82138	1	0.923926	1.096	1.03454	1.09051	0.810134	0.825992	1	0.931671	0.992681	1.01922	0.967399	0.892487	0.798428
AT1G23260.1	17851	| MMS ZWEI homologue 1 | Chr1:8257209-8258573 REVERSE LENGTH=158 | 201606	2	1	0.000162113	0.332576	0.0111371	1	0.0661646	0.661917	0.0664519	0.0739233	0.0642816	1.34623	1	0.124453	1.18534	0.113131	0.111459	0.108942	0.74203	1	0.0567855	1.10551	0.0557693	0.0531418	0.0511536	0.383323
AT1G23290.1	16292	| Ribosomal protein L18e/L15 superfamily protein | Chr1:8263007-8263447 FORWARD LENGTH=146 | 201606	16	1	0.00093545	0.00358196	0.0626151	1	1.70047	1.64881	1.16847	0.955573	0.997649	0.702654	1	1.36632	1.72117	1.23532	1.20253	1.0663	0.890707	1	1.0278	0.888156	0.749311	0.797728	0.781988	0.6262
AT1G23310.1	53301	| glutamate:glyoxylate aminotransferase | Chr1:8268720-8271329 REVERSE LENGTH=481 | 201606	118	62	5.33964e-06	2.2083e-06	0.00241948	1	0.882128	0.89698	1.00892	1.16241	0.835884	0.959882	1	1.07267	0.916886	0.976872	0.997097	0.730857	0.81436	1	0.893517	0.862274	0.952873	0.988561	0.714436	0.838964
AT1G23440.1	23618	| Peptidase C15%2C pyroglutamyl peptidase I-like protein | Chr1:8321940-8324019 FORWARD LENGTH=217 | 201606	4	4	0.256908	0.00010448	0.00203543	1	3.58472	3.47444	12.1688	3.8726	11.7753	0.903238	1	0.950514	3.6924	4.87862	4.42872	1.17933	0.115891	1	2.53948	6.4617	10.3559	4.61418	5.10794	0.235547
AT1G23440.2	9813	| Peptidase C15%2C pyroglutamyl peptidase I-like protein | Chr1:8321940-8322224 FORWARD LENGTH=94 | 201606	3	3	0.486054	4.10606e-07	1.57017e-11	1	0.887847	3.47444	0.891703	0.99196	0.862579	0.903238	1	0.921884	25.2661	0.838015	0.825627	0.806983	0.793008	1	0.965456	25.4663	0.948178	0.903506	0.869703	0.928317
AT1G23490.1	20593	| ADP-ribosylation factor 1 | Chr1:8337232-8338373 FORWARD LENGTH=181 | 201606	20	2	0.00634451	0.213832	0.580442	1	1.36311	1.30601	0.840004	1.0709	1.19037	0.796683	1	1.14074	1.1698	1.32387	1.24597	1.46615	1.1367	1	0.837006	0.994631	0.916251	0.985383	1.20075	0.79364
AT1G23730.1	28829	| beta carbonic anhydrase 3 | Chr1:8395965-8398014 FORWARD LENGTH=258 | 201606	13	10	0.6339	2.75604e-10	8.14053e-06	1	0.964281	0.58085	0.964783	1.15531	1.005	0.978659	1	1.23134	1.47679	2.64441	6.40303	2.66215	3.40819	1	2.54441	4.17359	5.67823	5.0913	5.84267	3.29958
AT1G23740.1	40986	| Oxidoreductase%2C zinc-binding dehydrogenase family protein | Chr1:8398245-8399656 REVERSE LENGTH=386 | 201606	52	52	0.00646283	0.00201837	0.0183994	1	0.958783	0.919677	1.11352	1.00525	1.1518	1.17571	1	1.01028	0.826786	0.892235	0.655349	0.881185	0.808416	1	0.926328	0.859416	0.828198	0.910244	0.714642	0.884221
AT1G23800.1	58153	| aldehyde dehydrogenase 2B7 | Chr1:8412238-8414804 REVERSE LENGTH=534 | 201606	4	2	0.0650957	0.0124134	0.00322717	1	11.875	6.42559	0.891703	9.9196	8.62579	6.32042	1	9.21884	3.30399	0.838015	3.15096	8.29777	13.1563	1	6.76011	6.48029	0.948178	9.34715	34.5007	9.63667
AT1G23820.1	36554	| spermidine synthase | Chr1:8420410-8422724 FORWARD LENGTH=334 | 201606	13	8	0.0681403	0.15267	0.0994353	1	1.45074	0.690686	1.1664	1.06983	0.785251	1.22337	1	0.843596	0.609402	0.624207	0.749712	0.599847	0.648246	1	1.05095	0.618411	0.784771	0.718307	0.768121	0.73923
AT1G23820.2	36507	| spermidine synthase | Chr1:8420278-8422480 FORWARD LENGTH=327 | 201606	15	9	3.14986e-13	3.02347e-06	7.75071e-10	1	121.315	0.866903	0.891703	0.99196	0.862579	0.903238	1	113.069	0.846091	0.838015	0.825627	0.806983	0.793008	1	118.993	0.967021	0.948178	0.903506	0.869703	0.928317
AT1G23860.1	21537	| RS-containing zinc finger protein 21 | Chr1:8428091-8429164 REVERSE LENGTH=187 | 201606	2	2	0.188881	0.24231	0.851244	1	0.879958	0.855261	0.87581	0.495223	0.846625	1.64368	1	1.09513	1.51952	0.836473	0.811426	1.45326	1.11646	1	1.20259	1.63195	1.17301	1.35194	1.73462	1.39237
AT1G23870.1	98496	| trehalose-phosphatase/synthase 9 | Chr1:8432695-8435506 FORWARD LENGTH=867 | 201606	6	2	4.75136e-06	0.0534638	2.09947e-09	1	0.887847	0.866903	11.8987	9.9196	8.62579	0.903238	1	0.921884	0.846091	8.69904	18.7964	18.6601	0.793008	1	0.965456	0.967021	28.4454	6.27126	29.0712	0.928317
AT1G23900.1	96469	| gamma-adaptin 1 | Chr1:8441379-8447152 FORWARD LENGTH=876 | 201606	12	11	0.00210421	0.201022	0.438565	1	1.69662	0.694929	1.61083	1.38174	1.21392	0.108308	1	0.57952	0.685273	1.2001	1.1564	0.905659	1.03547	1	0.899001	1.11255	1.83345	0.978034	1.34236	0.932864
AT1G24020.1	17054	| MLP-like protein 423 | Chr1:8500653-8501458 REVERSE LENGTH=155 | 201606	11	11	0.000448377	5.03597e-06	1.77714e-08	1	0.787102	0.59412	0.50583	0.533541	0.197573	0.748656	1	0.919352	0.881216	0.767832	0.485259	0.480442	0.252818	1	1.39904	0.337896	0.589333	0.564431	0.195236	0.928699
AT1G24040.1	36019	| Acyl-CoA N-acyltransferases (NAT) superfamily protein | Chr1:8505794-8506753 REVERSE LENGTH=319 | 201606	6	6	0.00276265	0.0030779	0.148682	1	1.37162	0.550605	1.12613	0.541194	0.781753	0.492789	1	2.06497	0.470186	1.41628	0.824022	0.728308	0.885834	1	0.677964	0.449225	0.713752	0.367707	0.303565	0.489643
AT1G24050.1	20491	| RNA-processing%2C Lsm domain-containing protein | Chr1:8507057-8508439 FORWARD LENGTH=188 | 201606	6	5	0.00109564	0.75736	0.544022	1	0.873456	1.59743	1.13732	0.981399	0.48743	2.04733	1	0.91387	0.942121	1.34596	1.12445	0.905044	1.48187	1	0.895664	0.585935	0.663787	1.18628	0.813364	0.786218
AT1G24100.1	51002	| UDP-glucosyl transferase 74B1 | Chr1:8525547-8527010 REVERSE LENGTH=460 | 201606	16	16	6.20927e-06	0.00547437	0.464481	1	0.921856	0.865815	0.990891	1.39286	1.30863	0.103576	1	0.930924	0.668974	1.15204	1.99365	1.41694	1.88109	1	0.903421	0.885407	1.28502	0.873375	1.15135	0.924074
AT1G24180.1	43359	| Thiamin diphosphate-binding fold (THDP-binding) superfamily protein | Chr1:8560777-8563382 REVERSE LENGTH=393 | 201606	23	16	6.33946e-05	0.0066391	0.0159548	1	1.30807	1.16488	1.59606	1.45506	1.68084	1.97423	1	1.16793	0.869471	1.46371	1.23552	1.33206	1.64532	1	0.983973	0.991583	1.16853	1.14308	1.16046	1.48571
AT1G24300.1	166270	| GYF domain-containing protein | Chr1:8614515-8620420 REVERSE LENGTH=1495 | 201606	9	7	0.102271	0.00161815	0.078507	1	1.90114	1.43645	0.884602	0.654848	1.69973	2.84262	1	8.09667	10.2041	3.97441	6.38579	10.3327	14.5857	1	1.15809	1.71014	2.05847	1.2611	2.9685	3.34995
AT1G24300.3	150123	| GYF domain-containing protein | Chr1:8615178-8620420 REVERSE LENGTH=1344 | 201606	7	6	0.0533402	0.000251981	0.000392875	1	1.90114	0.0431245	0.884602	0.654848	1.69973	0.044932	1	8.09667	0.203521	3.97441	6.38579	10.3327	0.190752	1	1.15809	0.0581731	2.05847	1.2611	2.9685	0.0558448
AT1G24340.1	78321	| FAD/NAD(P)-binding oxidoreductase family protein | Chr1:8635416-8638866 FORWARD LENGTH=709 | 201606	6	6	0.000206755	0.0108206	0.0486588	1	0.873199	2.29578	1.28953	0.951847	5.64325	0.676183	1	0.920499	2.30069	2.88802	3.3568	4.36174	4.10709	1	0.970743	1.7053	2.84141	3.19408	3.9501	2.32507
AT1G24360.1	33548	| NAD(P)-binding Rossmann-fold superfamily protein | Chr1:8640820-8643283 FORWARD LENGTH=319 | 201606	23	23	0.00106441	0.000785093	0.00752773	1	1.11894	0.891029	0.961062	1.13544	0.873855	0.610496	1	0.959043	0.814495	0.890511	0.864559	0.749805	0.579473	1	1.0772	0.926624	1.18925	0.893052	0.737005	0.801079
AT1G24460.1	202119	| TGN-related%2C localized SYP41 interacting protein | Chr1:8666072-8672338 FORWARD LENGTH=1807 | 201606	4	4	0.00122331	0.00343568	0.00111195	1	3.24062	0.0866903	0.0891703	0.099196	0.0862579	0.0903238	1	3.76522	0.209682	0.20768	3.98397	0.19999	0.196526	1	2.12814	0.0709741	0.0695912	2.00241	0.0638315	0.0681335
AT1G24460.2	193589	| TGN-related%2C localized SYP41 interacting protein | Chr1:8666072-8672338 FORWARD LENGTH=1732 | 201606	6	6	0.060586	0.00121829	0.0169965	1	3.24062	1.44408	1.18987	0.099196	1.9894	1.50193	1	3.76522	6.97585	6.92784	0.20461	12.6219	6.53326	1	2.12814	1.8291	2.30247	0.0663125	2.95906	1.81844
AT1G24490.1	55188	| OxaA/YidC-like membrane insertion protein | Chr1:8682364-8684966 FORWARD LENGTH=499 | 201606	5	5	0.0196762	0.00207716	0.0699482	1	2.19864	2.79715	2.21205	2.4328	1.93334	0.0670491	1	2.1653	3.65746	2.79922	2.44005	3.75292	2.90664	1	1.7436	2.43866	2.44538	1.62758	2.79159	1.11165
AT1G24490.2	51173	| OxaA/YidC-like membrane insertion protein | Chr1:8682364-8684966 FORWARD LENGTH=462 | 201606	5	5	0.00385523	9.35581e-05	0.000989771	1	2.19864	0.0643518	2.21205	2.4328	1.93334	0.0670491	1	2.1653	0.0846091	2.79922	2.44005	3.75292	2.90664	1	1.7436	0.0580978	2.44538	1.62758	2.79159	1.11165
AT1G24510.1	59385	| TCP-1/cpn60 chaperonin family protein | Chr1:8685504-8688101 REVERSE LENGTH=535 | 201606	23	23	0.00482774	0.677978	0.0395045	1	1.61574	0.845647	1.34825	1.40576	1.26236	1.1836	1	1.00322	1.01376	0.960641	1.06327	0.845974	0.817889	1	0.916795	0.545709	0.679835	0.833516	0.693896	0.856876
AT1G24610.1	52590	| Rubisco methyltransferase family protein | Chr1:8720906-8722711 REVERSE LENGTH=476 | 201606	6	6	0.118252	0.514592	0.727022	1	1.38132	1.16077	1.39025	1.31798	1.43892	0.502357	1	0.65078	0.719052	0.914545	0.63836	0.938611	0.863433	1	0.888807	0.725757	0.874799	0.833584	1.00198	0.856867
AT1G25220.1	30460	| anthranilate synthase beta subunit 1 | Chr1:8837430-8839478 REVERSE LENGTH=276 | 201606	6	6	0.00776578	0.00284025	0.00287869	1	0.675716	0.405695	0.89218	0.811497	0.805819	1.0594	1	0.941697	1.2547	1.23804	2.27381	1.4178	2.20313	1	0.707816	1.09935	1.64816	1.20642	1.80337	1.48658
AT1G25350.1	91247	| glutamine-tRNA ligase%2C putative / glutaminyl-tRNA synthetase%2C putative / GlnRS | Chr1:8889280-8894205 REVERSE LENGTH=795 | 201606	18	18	0.000823864	0.123906	0.473592	1	2.3266	2.80716	2.40934	1.9885	1.65469	0.903984	1	1.24942	2.03741	1.18948	1.74333	1.27877	1.47102	1	1.1459	1.17345	1.18162	1.01582	0.8408	0.900457
AT1G25380.1	39496	| NAD+ transporter 2 | Chr1:8903726-8905818 FORWARD LENGTH=363 | 201606	2	2	0.000547313	9.45561e-05	0.000274963	1	0.887847	0.866903	0.891703	13.1203	17.0843	3.6152	1	0.921884	0.846091	0.838015	16.2127	24.2095	21.218	1	0.965456	0.967021	0.948178	12.0098	11.5334	12.3565
AT1G25380.2	39496	| NAD+ transporter 2 | Chr1:8903726-8905818 FORWARD LENGTH=363 | 201606	2	2	0.00139103	0.00035583	0.000451347	1	0.887847	0.866903	11.8987	13.1203	17.0843	3.6152	1	0.921884	0.846091	11.2319	16.2127	24.2095	21.218	1	0.965456	0.967021	9.48178	12.0098	11.5334	12.3565
AT1G25450.1	55653	| 3-ketoacyl-CoA synthase 5 | Chr1:8938679-8940282 REVERSE LENGTH=492 | 201606	4	1	2.48684e-08	3.80766e-09	0.000228338	1	0.355139	0.0259406	0.0266827	0.0296827	0.0258112	0.0270279	1	0.0346213	0.0317749	0.0314716	0.0310064	0.0303062	0.0297814	1	0.547422	0.0412126	0.0404096	0.0385057	0.0370651	0.0395631
AT1G25480.1	61720	| aluminum activated malate transporter family protein | Chr1:8948467-8950876 FORWARD LENGTH=548 | 201606	1	1	2.19967e-05	0.00019103	1.798e-19	1	0.887847	0.866903	14.786	26.3279	0.862579	0.903238	1	0.921884	0.846091	8.38015	5.93094	0.806983	0.793008	1	0.965456	0.967021	9.48178	9.03506	0.869703	0.928317
AT1G25490.1	65494	| ARM repeat superfamily protein | Chr1:8951700-8954899 FORWARD LENGTH=588 | 201606	23	15	0.0177246	0.235124	0.137116	1	1.21744	1.13705	1.38322	1.11772	1.0232	0.740299	1	0.921379	0.996673	0.956983	1.15996	1.06143	1.1817	1	1.05149	1.24346	1.11623	0.999674	1.06977	0.994899
AT1G25570.1	68972	| Di-glucose binding protein with Leucine-rich repeat domain-containing protein | Chr1:8992183-8995430 REVERSE LENGTH=628 | 201606	2	2	8.27575e-06	0.0826361	0.000186892	1	0.349075	0.0866903	0.357523	0.099196	1.72516	0.903238	1	0.134725	1.25649	1.24626	0.120658	2.35268	1.91073	1	0.965456	0.967021	15.9269	0.903506	17.2946	15.493
AT1G26090.1	49908	| P-loop containing nucleoside triphosphate hydrolases superfamily protein | Chr1:9020509-9022619 FORWARD LENGTH=455 | 201606	12	12	0.000586614	0.0100754	0.0920557	1	1.12912	1.57335	0.718963	0.635392	2.64471	0.816808	1	0.977636	0.906481	0.736599	0.575174	1.52458	1.59385	1	1.02367	1.0688	0.70789	1.12642	1.72862	1.27426
AT1G26110.1	64370	| decapping 5 | Chr1:9024616-9027556 REVERSE LENGTH=611 | 201606	8	8	0.105111	0.00351302	0.025089	1	2.3959	1.35551	2.26437	2.52702	2.32492	2.94922	1	0.780658	0.710361	1.40643	1.39208	1.48857	1.76603	1	0.911319	1.07334	1.25369	0.652161	1.01226	1.44552
AT1G26160.1	28695	| Metal-dependent phosphohydrolase | Chr1:9044784-9046945 REVERSE LENGTH=258 | 201606	2	2	0.000534042	0.363812	0.27983	1	1.23957	0.866887	1.07059	0.804054	1.383	2.16887	1	0.76258	0.56716	0.98935	0.412814	1.21047	0.657813	1	1.16162	0.956628	0.783664	1.26524	1.21808	2.04728
AT1G26160.2	24075	| Metal-dependent phosphohydrolase | Chr1:9045198-9046945 REVERSE LENGTH=217 | 201606	2	2	7.12655e-08	0.000181871	0.000237996	1	1.23957	0.0520405	0.0535293	0.804054	0.051781	2.16887	1	0.76258	0.0423045	0.0419007	0.412814	0.0403492	0.657813	1	1.16162	0.0580978	0.0569657	1.26524	0.052251	2.04728
AT1G26220.1	21851	| Acyl-CoA N-acyltransferases (NAT) superfamily protein | Chr1:9071157-9071750 FORWARD LENGTH=197 | 201606	6	6	0.0211887	0.212304	0.0639395	1	0.881064	1.72455	1.24758	1.55189	2.41558	2.69646	1	1.20484	1.83786	0.961357	0.359797	1.27599	1.36553	1	1.0757	0.847729	0.648177	1.31005	0.205556	1.24227
AT1G26230.1	66796	| TCP-1/cpn60 chaperonin family protein | Chr1:9072388-9075272 REVERSE LENGTH=611 | 201606	4	2	0.0822491	0.587145	0.0041208	1	1.58029	8.10309	6.07345	3.36967	1.58371	3.84913	1	0.945331	0.868702	0.526361	0.35396	0.0498094	0.66688	1	0.253457	0.244011	0.250364	0.680419	0.13374	0.0349552
AT1G26230.3	60391	| TCP-1/cpn60 chaperonin family protein | Chr1:9072388-9075023 REVERSE LENGTH=551 | 201606	4	2	0.183559	0.446938	0.00170908	1	1.58029	0.221402	6.07345	3.36967	1.58371	3.84913	1	0.945331	0.0522233	0.526361	0.35396	0.0498094	0.66688	1	0.253457	0.0364126	0.250364	0.680419	0.13374	0.0349552
AT1G26320.1	38765	| Zinc-binding dehydrogenase family protein | Chr1:9105240-9107029 FORWARD LENGTH=351 | 201606	2	1	2.00869e-06	7.60046e-09	0.0017137	1	1.55502	0.0649765	0.0668353	0.0743499	0.0646524	0.0677	1	2.14541	0.0846091	0.0838015	0.0825627	0.0806983	0.0793008	1	0.834377	0.041717	0.0409041	0.0389769	0.0375187	0.0400473
AT1G26340.1	15220	| cytochrome B5 isoform A | Chr1:9113992-9114755 FORWARD LENGTH=135 | 201606	1	1	0.431533	0.233363	0.780149	1	0.885129	1.03753	1.06896	1.17535	0.863872	0.379911	1	0.930365	1.29246	1.48438	1.22533	0.816903	0.604447	1	0.98827	0.958162	0.937338	0.476048	0.680225	0.695094
AT1G26380.1	59818	| FAD-binding Berberine family protein | Chr1:9126901-9128508 REVERSE LENGTH=535 | 201606	4	2	1.91932e-05	0.49394	2.40437e-07	1	0.887847	0.866903	0.891703	0.99196	0.862579	0.903238	1	0.921884	0.846091	0.838015	0.825627	0.806983	3.10804	1	0.965456	0.967021	0.948178	0.903506	40.7483	3.73587
AT1G26390.1	58948	| FAD-binding Berberine family protein | Chr1:9130164-9131756 REVERSE LENGTH=530 | 201606	9	5	1.91932e-05	0.000221617	1.97254e-11	1	0.887847	0.866903	0.891703	0.99196	0.862579	0.903238	1	0.921884	0.846091	0.838015	0.825627	0.806983	0.793008	1	0.965456	0.967021	0.948178	0.903506	60.9234	0.928317
AT1G26460.1	70235	| Tetratricopeptide repeat (TPR)-like superfamily protein | Chr1:9151816-9154407 FORWARD LENGTH=630 | 201606	6	6	0.0307372	0.40904	0.0886982	1	1.6574	1.49432	1.41057	2.12619	1.47748	0.646285	1	0.671032	1.07327	0.908052	1.18129	0.810701	0.717086	1	1.55763	1.69436	1.87942	1.79444	1.29608	1.49857
AT1G26550.1	14857	| FKBP-like peptidyl-prolyl cis-trans isomerase family protein | Chr1:9171800-9172716 FORWARD LENGTH=142 | 201606	6	6	0.00334316	0.0886038	0.129365	1	1.27992	1.57293	1.83883	1.36436	1.12785	1.98039	1	0.905091	1.25265	1.38316	0.753812	1.37426	1.35064	1	1.27298	1.04291	0.906054	0.861926	1.34907	1.35063
AT1G26570.1	52972	| UDP-glucose dehydrogenase 1 | Chr1:9182801-9184246 FORWARD LENGTH=481 | 201606	8	2	5.54953e-06	1.10074e-09	1.34467e-06	1	0.882792	0.601082	0.862049	0.00897606	0.00780532	0.00817324	1	0.783332	0.490903	0.672838	0.00553719	0.00541215	0.00531842	1	0.991052	0.738348	0.442534	0.00752374	0.00724225	0.00773035
AT1G26630.1	17140	| Eukaryotic translation initiation factor 5A-1 (eIF-5A 1) protein | Chr1:9205968-9207098 FORWARD LENGTH=159 | 201606	13	11	0.00508472	0.493667	0.207651	1	0.927765	1.04396	0.979999	0.830418	0.713288	1.27554	1	0.985278	1.27044	1.19561	0.985655	0.893554	0.977564	1	1.2996	1.19106	1.00794	1.0243	0.959158	1.21952
AT1G26761.1	49741	| Arabinanase/levansucrase/invertase | Chr1:9250269-9251603 REVERSE LENGTH=444 | 201606	5	5	0.00043752	0.00253754	1.13258e-08	1	0.768	0.434838	0.646284	0.314474	0.158368	0.246129	1	1.35199	0.674557	0.852912	0.281221	0.193708	0.276368	1	0.386032	0.22695	0.341166	0.144218	0.010431	0.148754
AT1G26830.1	85313	| cullin 3 | Chr1:9296063-9298374 FORWARD LENGTH=732 | 201606	4	4	0.00747564	0.310105	0.0459433	1	17.7636	14.3613	3.57523	0.99196	3.41777	0.903238	1	0.703101	1.98041	0.58136	0.819002	1.61806	1.06861	1	6.38091	3.13675	1.66316	2.33432	6.44862	2.4364
AT1G26850.1	69623	| S-adenosyl-L-methionine-dependent methyltransferases superfamily protein | Chr1:9301146-9303432 REVERSE LENGTH=616 | 201606	15	15	3.29923e-07	0.000143117	1.14656e-05	1	0.865427	0.607487	0.780719	0.989809	0.257921	0.497094	1	0.613781	0.65892	0.484033	0.344036	0.539174	0.317137	1	0.871632	0.558904	0.42646	0.317068	0.371214	0.535296
AT1G26880.1	13705	| Ribosomal protein L34e superfamily protein | Chr1:9315640-9316681 REVERSE LENGTH=120 | 201606	9	3	0.145438	0.233039	0.39274	1	0.803523	0.784223	0.953014	0.858243	0.693649	0.362539	1	0.507755	1.02876	0.804799	0.952777	0.748342	0.792162	1	1.1885	0.862033	0.977625	1.11387	0.802896	0.855756
AT1G27020.1	35079	| plant/protein | Chr1:9378635-9380419 FORWARD LENGTH=308 | 201606	6	6	2.59217e-05	0.00431562	1.99593e-05	1	53.4797	17.3097	0.891703	0.99196	28.7459	0.903238	1	27.4283	25.4174	0.838015	8.12158	26.9023	39.8004	1	77.2623	71.4004	25.0368	12.0098	34.6886	12.3565
AT1G27090.1	46018	| glycine-rich protein | Chr1:9404041-9406098 REVERSE LENGTH=420 | 201606	12	12	0.103137	0.733377	0.0144493	1	0.901245	1.03277	0.853622	0.754271	0.722847	1.1483	1	0.886144	1.04227	1.03092	0.910751	1.01127	1.06192	1	1.05282	0.947398	0.758455	1.12642	1.20196	1.13636
AT1G27130.1	25131	| glutathione S-transferase tau 13 | Chr1:9425582-9426597 FORWARD LENGTH=227 | 201606	11	10	0.153681	0.0122813	0.00927319	1	1.19659	0.699425	0.769444	1.13644	1.04345	0.87594	1	1.03128	0.714014	0.959969	0.765897	1.17461	1.35237	1	1.18999	0.860067	0.730374	0.778065	0.485102	0.843409
AT1G27150.1	53589	| Tetratricopeptide repeat (TPR)-like superfamily protein | Chr1:9429177-9432068 FORWARD LENGTH=468 | 201606	2	2	0.12287	0.51436	0.39013	1	1.34172	1.0946	1.56512	1.25344	1.5279	0.476555	1	2.14833	1.69218	2.21887	1.34921	2.13895	1.58102	1	1.72756	1.15589	1.52753	1.07997	1.20313	1.66168
AT1G27190.1	65424	| Leucine-rich repeat protein kinase family protein | Chr1:9446923-9448728 REVERSE LENGTH=601 | 201606	4	4	0.00309927	0.124823	0.00017024	1	20.5513	8.66903	20.8821	13.1203	6.0706	0.903238	1	15.9219	14.1908	16.7978	5.53788	18.9187	5.54155	1	28.9895	22.34	15.555	3.59396	0.869703	3.73587
AT1G27310.1	13527	| nuclear transport factor 2A | Chr1:9484615-9485790 REVERSE LENGTH=122 | 201606	2	2	0.0469923	0.00266098	0.878371	1	0.466907	0.455907	0.673519	0.295472	0.0651521	0.273063	1	1.58607	0.436632	0.439542	0.237824	0.241883	0.40691	1	0.949877	1.72576	0.936077	0.223688	1.57033	0.914628
AT1G27390.1	23170	| translocase outer membrane 20-2 | Chr1:9513469-9514912 REVERSE LENGTH=210 | 201606	4	4	0.0156519	0.64747	0.196358	1	0.887847	1.44124	1.76732	2.95286	1.44125	0.931388	1	1.36277	1.86788	1.43151	1.38643	1.19482	0.9874	1	0.961779	1.68224	2.59588	1.35913	1.73379	1.62595
AT1G27400.1	19897	| Ribosomal protein L22p/L17e family protein | Chr1:9515230-9516725 FORWARD LENGTH=176 | 201606	18	14	0.0177133	0.0809356	0.768099	1	0.917023	1.22171	1.30469	1.0205	0.829321	1.07188	1	0.973953	1.08526	0.92803	1.07067	0.702314	0.93016	1	1.16975	1.07929	1.07878	1.10865	1.09914	1.17298
AT1G27430.1	165434	| GYF domain-containing protein | Chr1:9521045-9526928 REVERSE LENGTH=1492 | 201606	6	4	0.0203347	0.0561031	0.0159981	1	0.811027	0.0216173	0.668726	0.0247357	0.713375	1.35442	1	1.13622	0.0522233	0.866967	0.828549	1.66022	1.96908	1	0.868877	0.0290677	0.566692	1.18355	0.696023	1.02379
AT1G27430.3	152238	| GYF domain-containing protein | Chr1:9521433-9526928 REVERSE LENGTH=1364 | 201606	6	4	0.0760142	0.430808	0.370881	1	0.811027	0.369038	0.668726	0.0247357	0.713375	1.35442	1	1.13622	1.21809	0.866967	0.828549	1.66022	1.96908	1	0.868877	0.572598	0.566692	1.18355	0.696023	1.02379
AT1G27450.1	26396	| adenine phosphoribosyl transferase 1 | Chr1:9532042-9533807 FORWARD LENGTH=243 | 201606	19	11	0.0768215	0.206703	7.8092e-05	1	0.832941	0.867048	0.908707	0.971652	1.01526	1.21959	1	1.01748	1.07451	0.992252	1.15179	1.20777	1.30524	1	1.22136	0.808597	0.93238	1.10027	1.38662	1.04439
AT1G27450.2	19739	| adenine phosphoribosyl transferase 1 | Chr1:9532421-9533807 FORWARD LENGTH=183 | 201606	14	1	2.13909e-10	2.03691e-09	1.51928e-12	1	0.00423146	0.742963	0.710426	0.00472765	0.00411103	0.00430481	1	0.00511108	0.825021	0.8062	0.00457741	0.00447405	0.00439657	1	0.00459741	0.687352	0.769344	0.00430241	0.00414144	0.00442056
AT1G27450.3	30988	| adenine phosphoribosyl transferase 1 | Chr1:9532042-9533807 FORWARD LENGTH=284 | 201606	16	7	6.87952e-15	1.03819e-10	1.1855e-17	1	0.832941	0.00413164	0.00424983	0.00472765	0.00411103	0.00430481	1	1.01748	0.00469087	0.00464609	0.00457741	0.00447405	0.00439657	1	1.22136	0.00453245	0.00444413	0.00423475	0.00407631	0.00435104
AT1G27480.1	48308	| alpha/beta-Hydrolases superfamily protein | Chr1:9544607-9546168 FORWARD LENGTH=432 | 201606	6	6	0.0448241	0.272367	0.0987776	1	2.20352	2.16851	1.78183	1.49005	2.37038	1.01647	1	2.52509	2.32816	2.87387	1.43903	2.79505	2.61111	1	1.03594	0.963758	1.15747	0.449635	1.11188	1.45709
AT1G27530.1	19611	| ubiquitin-fold modifier-conjugating enzyme | Chr1:9562761-9563887 REVERSE LENGTH=174 | 201606	5	5	0.0937475	0.0795237	0.00179165	1	0.887847	8.90763	3.63496	4.11902	3.54186	21.4294	1	0.921884	11.1919	13.9899	8.58308	5.68701	23.6086	1	0.965456	3.66662	0.948178	21.141	29.2591	15.4468
AT1G27650.1	34572	| U2 snRNP auxiliary factor small subunit | Chr1:9615152-9616042 FORWARD LENGTH=296 | 201606	4	4	0.032854	0.00112665	0.029492	1	0.590972	0.580301	0.592575	0.329099	0.509896	0.451619	1	1.20554	0.508846	0.674366	0.731676	0.323507	0.55427	1	0.69967	0.274719	0.942206	0.410717	0.470554	0.759784
AT1G27680.1	57470	| ADPGLC-PPase large subunit | Chr1:9631630-9634450 FORWARD LENGTH=518 | 201606	3	2	0.447976	0.598075	0.259865	1	1.07405	1.04256	0.890884	0.904303	1.0437	0.453499	1	1.40229	1.13271	1.12394	1.48505	1.62499	1.20016	1	0.886665	0.713589	0.640716	0.828991	0.72627	0.698139
AT1G27770.1	111261	| autoinhibited Ca2+-ATPase 1 | Chr1:9671912-9676010 REVERSE LENGTH=1020 | 201606	11	9	0.166223	0.00824859	0.013915	1	1.77218	1.29373	1.77572	1.80532	1.15583	0.44932	1	0.653013	1.08804	1.07615	2.97891	1.76362	1.42201	1	1.54188	2.35986	2.63658	0.990788	2.76574	0.833887
AT1G27770.2	103716	| autoinhibited Ca2+-ATPase 1 | Chr1:9671912-9676010 REVERSE LENGTH=946 | 201606	7	5	0.000153898	5.15154e-09	4.20791e-10	1	0.0441664	0.0431245	0.0443582	0.0493455	0.0429094	0.044932	1	0.0275123	0.0252504	0.0250093	0.0246396	0.0240832	0.0236662	1	0.0289259	0.0289728	0.0284083	0.0270699	0.0260571	0.0278132
AT1G27930.1	32356	| glucuronoxylan 4-O-methyltransferase-like protein (DUF579) | Chr1:9731510-9732379 REVERSE LENGTH=289 | 201606	3	3	0.0301805	0.0647936	0.325081	1	0.467363	0.264359	0.0673519	0.758106	0.0651521	0.0682232	1	0.650411	0.586684	0.0838015	1.65125	0.838395	0.593042	1	1.89088	0.944957	0.359881	1.17413	0.588044	0.361169
AT1G27950.1	19759	| glycosylphosphatidylinositol-anchored lipid protein transfer 1 | Chr1:9740740-9741991 FORWARD LENGTH=193 | 201606	4	4	0.189467	0.0666213	0.174519	1	2.15911	1.9798	2.17391	1.69559	2.36358	2.20372	1	1.13474	1.97928	1.49057	1.53066	1.61993	1.93608	1	1.45483	1.33866	1.49653	1.54471	1.48383	2.24056
AT1G27970.1	14002	| nuclear transport factor 2B | Chr1:9746921-9747787 FORWARD LENGTH=126 | 201606	4	4	0.0332122	0.00288885	0.000501867	1	4.68184	2.92696	3.43334	2.43757	0.489853	1.77772	1	2.07097	0.547154	2.75353	1.63057	0.350204	0.660303	1	0.871587	0.781867	0.94965	1.45312	0.180804	0.287032
AT1G28120.1	34434	| ubiquitin thioesterase otubain-like protein | Chr1:9813219-9815143 REVERSE LENGTH=306 | 201606	4	4	0.0477219	0.000469949	0.222759	1	6.1816	17.3381	0.891703	6.79254	20.5337	0.903238	1	0.497762	0.864602	0.0638752	1.65771	1.432	0.80051	1	1.29028	0.666618	0.0948178	0.931939	1.15776	0.369431
AT1G28140.1	30279	| integral membrane family protein | Chr1:9833029-9834390 REVERSE LENGTH=280 | 201606	3	3	0.132183	0.0331532	0.460932	1	2.0005	1.5101	0.664519	0.981012	0.642816	0.898593	1	4.5693	3.51683	2.0768	2.66999	2.67739	3.93053	1	2.24994	1.24794	1.5555	1.50807	1.72504	2.16567
AT1G28150.1	13582	| hypothetical protein | Chr1:9835122-9835842 REVERSE LENGTH=123 | 201606	1	1	0.285161	0.11103	0.0580469	1	1.7143	2.09326	1.72828	2.40332	2.06187	1.30467	1	0.921884	1.13085	0.838015	1.65125	1.61397	1.30746	1	0.287279	0.724075	0.956882	0.906454	0.866894	1.39019
AT1G28200.1	27958	| FH interacting protein 1 | Chr1:9850395-9852300 REVERSE LENGTH=259 | 201606	8	8	0.0222177	0.321906	0.234175	1	1.12628	1.41572	0.566252	0.891527	1.17404	0.983709	1	0.917732	1.3182	1.73946	1.67613	1.87419	2.36062	1	1.2854	1.14468	1.05796	1.39889	1.82732	1.1312
AT1G28290.1	38489	| arabinogalactan protein 31 | Chr1:9889331-9890843 REVERSE LENGTH=359 | 201606	3	3	0.000366664	5.06258e-05	1.518e-06	1	1.28812	0.483303	0.30385	0.237195	0.478681	0.030289	1	4.39974	4.46708	3.60422	1.18542	1.19137	0.795643	1	18.7882	1.69145	0.240587	2.39238	3.75174	5.49507
AT1G28330.1	13406	| dormancy-associated protein-like 1 | Chr1:9934252-9935216 REVERSE LENGTH=122 | 201606	3	3	3.56746e-05	5.52473e-05	0.00557747	1	0.887847	8.66903	0.891703	0.99196	17.3895	27.0848	1	0.921884	14.3936	0.838015	0.825627	10.7174	34.2426	1	0.965456	15.8592	0.948178	0.903506	9.02487	34.0764
AT1G28350.1	84717	| Nucleotidylyl transferase superfamily protein | Chr1:9944483-9949577 FORWARD LENGTH=748 | 201606	12	8	0.0031447	0.038535	0.169941	1	1.04924	1.19092	0.940931	0.986503	0.477797	0.393827	1	0.644258	0.918967	0.906237	0.948697	0.4558	0.515964	1	0.713948	0.620112	0.735661	0.668669	0.720638	0.605387
AT1G28570.1	43301	| SGNH hydrolase-type esterase superfamily protein | Chr1:10041838-10044112 REVERSE LENGTH=389 | 201606	2	2	0.0347198	0.000988781	0.901344	1	0.0845307	0.0825366	0.0848978	1.25332	0.322882	0.345255	1	0.398746	0.255111	0.036247	0.695334	0.362635	1.24937	1	1.82788	0.918033	1.37212	1.32024	1.27851	0.923258
AT1G28580.1	43025	| GDSL-like Lipase/Acylhydrolase superfamily protein | Chr1:10044603-10046379 REVERSE LENGTH=390 | 201606	1	1	0.0475719	4.65946e-10	0.0150021	1	0.0845307	0.0825366	0.0848978	0.0944431	0.0821249	0.0859961	1	0.398746	0.0365963	0.036247	0.0357112	0.0349048	0.0343003	1	1.82788	0.136993	1.37212	0.127995	0.123207	0.13151
AT1G28600.1	43610	| GDSL-like Lipase/Acylhydrolase superfamily protein | Chr1:10051228-10053073 REVERSE LENGTH=393 | 201606	4	4	0.031398	7.67142e-06	0.149764	1	0.0650408	0.0635065	0.0653233	0.286573	0.0631898	0.0661683	1	0.221752	0.203521	0.201578	8.03252	1.34931	0.190752	1	0.0706187	0.0707332	0.0693549	0.885494	0.885385	0.0679021
AT1G28680.1	49679	| HXXXD-type acyl-transferase family protein | Chr1:10078222-10079763 FORWARD LENGTH=451 | 201606	3	3	0.0800282	0.00197064	0.0748225	1	0.0873644	0.0853035	0.0877438	0.0976091	0.333706	0.0888789	1	0.290839	0.0644908	0.0638752	1.66292	0.457419	0.0604447	1	0.649907	0.662015	0.0915488	1.17995	2.22182	0.0896311
AT1G28960.1	32824	| nudix hydrolase homolog 15 | Chr1:10110135-10111607 REVERSE LENGTH=293 | 201606	1	1	4.88732e-07	0.000195504	4.86744e-05	1	11.7706	0.866903	0.891703	23.0399	8.62579	9.03238	1	9.21884	0.846091	3.28079	10.84	8.06983	7.93008	1	12.8448	0.967021	0.948178	9.03506	8.69703	15.493
AT1G29040.1	21439	| 50S ribosomal protein L34 | Chr1:10134120-10135180 FORWARD LENGTH=198 | 201606	4	4	0.0663785	0.477574	0.0187905	1	1.15858	1.04407	0.983362	1.19371	0.778513	1.1776	1	1.34299	1.03709	0.752126	0.727227	1.24946	1.23261	1	2.35275	1.02529	0.673285	1.54847	1.87317	2.39778
AT1G29040.2	19839	| 50S ribosomal protein L34 | Chr1:10134120-10135180 FORWARD LENGTH=183 | 201606	4	4	3.87151e-08	0.00121322	0.00162491	1	0.0267106	1.04407	0.983362	1.19371	0.778513	0.0271737	1	0.0307295	1.03709	0.752126	0.727227	1.24946	0.0264336	1	0.041493	1.02529	0.673285	1.54847	1.87317	0.0398969
AT1G29040.3	17501	| 50S ribosomal protein L34 | Chr1:10134120-10135064 FORWARD LENGTH=159 | 201606	3	3	4.60071e-11	0.000678586	8.14278e-07	1	0.887847	0.866903	32.6864	0.99196	0.862579	0.903238	1	0.921884	0.846091	22.5638	0.825627	0.806983	0.793008	1	0.965456	0.967021	15.6659	0.903506	0.869703	0.928317
AT1G29040.4	19122	| 50S ribosomal protein L34 | Chr1:10134120-10135128 FORWARD LENGTH=174 | 201606	4	4	4.6664e-10	0.00122757	4.13223e-06	1	38.5104	0.866903	32.6864	0.99196	25.8774	39.1428	1	40.2897	0.846091	22.5638	0.825627	37.4839	36.9782	1	54.7435	0.967021	15.6659	0.903506	43.5847	55.7914
AT1G29150.1	46749	| non-ATPase subunit 9 | Chr1:10181240-10182499 FORWARD LENGTH=419 | 201606	22	22	0.00115504	0.0375899	0.0211757	1	0.869367	0.810811	0.664487	0.737966	0.625405	0.30007	1	0.949347	0.977381	1.2343	1.3878	1.10404	0.877542	1	0.988856	1.25597	1.12159	0.947522	1.20005	0.839613
AT1G29250.1	14574	| Alba DNA/RNA-binding protein | Chr1:10223461-10224592 REVERSE LENGTH=130 | 201606	12	9	0.000887538	0.0471177	0.000542667	1	0.884206	1.25377	1.40272	1.7769	1.30221	1.30647	1	1.06466	1.24083	1.43649	1.58422	1.4327	1.50375	1	1.71897	1.42391	1.21735	1.8925	1.81655	1.50755
AT1G29260.1	35473	| peroxin 7 | Chr1:10224923-10225876 FORWARD LENGTH=317 | 201606	5	5	0.10615	0.733533	0.393271	1	2.00277	2.22735	2.55402	1.26022	1.11446	0.633054	1	0.756372	1.23923	0.963752	1.45358	1.05956	1.1693	1	1.51193	1.53178	1.07101	1.41873	0.87581	0.924442
AT1G29310.1	52068	| SecY protein transport family protein | Chr1:10252662-10254526 FORWARD LENGTH=475 | 201606	12	12	0.0344285	0.142501	0.477267	1	0.896692	0.579525	0.163026	0.384424	0.418918	0.125051	1	0.424264	0.608541	0.313385	1.08193	0.787467	0.563899	1	0.667299	0.759018	0.909458	1.18898	1.05871	0.610225
AT1G29350.1	90879	| RNA polymerase II degradation factor-like protein (DUF1296) | Chr1:10268761-10273613 REVERSE LENGTH=831 | 201606	11	11	0.0379133	0.0797336	0.617538	1	0.924889	1.04814	1.1555	0.946016	0.826161	1.35601	1	0.845296	1.68224	1.09208	1.40979	1.32597	1.11631	1	1.00329	1.10757	0.825097	1.08357	1.18293	1.22581
AT1G29400.1	88212	| MEI2-like protein 5 | Chr1:10290393-10293696 REVERSE LENGTH=800 | 201606	6	6	2.25206e-05	0.00280813	0.000611309	1	3.49075	26.0354	11.8987	13.164	37.0371	51.1687	1	21.1966	25.1495	25.453	43.1285	72.3699	52.5934	1	19.2769	34.11	35.0406	48.0832	66.6515	64.9822
AT1G29470.1	87205	| S-adenosyl-L-methionine-dependent methyltransferases superfamily protein | Chr1:10310424-10313369 REVERSE LENGTH=770 | 201606	4	4	0.00096127	0.00529966	1.2348e-08	1	9.18416	8.88211	32.7528	0.99196	0.862579	6.30932	1	1.00949	3.62267	1.2032	0.118542	0.115865	1.55318	1	0.965456	3.78069	9.48178	0.903506	0.869703	30.9399
AT1G29530.1	24886	| hypothetical protein | Chr1:10325553-10326651 REVERSE LENGTH=236 | 201606	5	5	0.00273448	0.0456195	0.0260694	1	3.41546	2.49289	0.128801	1.44346	4.53384	3.91688	1	4.53589	3.51683	0.20768	0.20461	5.99861	3.91814	1	1.55358	0.421547	0.0573409	0.732105	0.549389	0.561398
AT1G29660.1	40142	| GDSL-like Lipase/Acylhydrolase superfamily protein | Chr1:10371955-10373624 FORWARD LENGTH=364 | 201606	8	8	0.0361964	0.000225905	3.69881e-05	1	1.23807	0.780317	0.574883	1.18476	0.47531	0.995254	1	1.37283	0.455637	0.802615	0.540166	0.265446	0.523341	1	1.26604	0.3355	0.583388	0.55573	0.23447	0.716435
AT1G29670.1	39872	| GDSL-like Lipase/Acylhydrolase superfamily protein | Chr1:10375843-10377717 FORWARD LENGTH=363 | 201606	26	26	0.00174719	1.92313e-11	4.53555e-07	1	1.31105	0.527167	0.861826	0.912264	0.615507	0.68968	1	1.90688	0.869047	0.762547	0.668913	0.511687	0.39358	1	1.71921	0.507506	0.654726	0.837354	0.566664	0.534553
AT1G29690.1	62223	| MAC/Perforin domain-containing protein | Chr1:10379310-10381861 REVERSE LENGTH=561 | 201606	6	6	3.80515e-06	0.000158243	0.0006312	1	0.887847	0.866903	3.49024	0.99196	23.0383	12.058	1	0.921884	0.846091	19.5745	0.825627	18.8734	18.3508	1	0.965456	0.967021	12.791	0.903506	37.6245	31.0152
AT1G29700.1	38151	| Metallo-hydrolase/oxidoreductase superfamily protein | Chr1:10385196-10386906 REVERSE LENGTH=350 | 201606	8	8	0.0376562	0.0166851	0.546056	1	0.61527	0.668599	0.615318	0.684761	0.763881	0.834296	1	0.677659	0.558344	0.612918	0.442867	0.62485	0.490547	1	1.13241	0.943206	0.962877	0.808641	0.580251	0.881063
AT1G29810.1	21063	| Transcriptional coactivator/pterin dehydratase | Chr1:10435606-10437406 REVERSE LENGTH=187 | 201606	3	3	0.0113466	0.00196335	0.000231563	1	0.887847	9.00476	8.91703	6.79254	19.9234	12.0457	1	3.63662	11.3432	11.0943	13.4259	21.5166	29.0164	1	9.65456	12.7965	15.816	9.03506	11.5334	24.7762
AT1G29840.1	35287	| alpha/beta-Hydrolases superfamily protein | Chr1:10445735-10447569 REVERSE LENGTH=312 | 201606	3	2	0.00156366	0.0311366	0.0382988	1	2.21541	0.216314	0.222503	1.69491	2.15235	3.75265	1	3.56758	0.123648	0.479456	0.809309	1.97836	2.32244	1	2.28348	0.136993	0.52149	1.70138	2.05606	2.19895
AT1G29850.1	14975	| double-stranded DNA-binding family protein | Chr1:10447866-10449630 FORWARD LENGTH=129 | 201606	5	5	0.00826736	0.00261574	0.300188	1	0.801319	1.47528	1.43303	0.903522	0.684804	0.905865	1	0.7687	1.13352	1.04951	0.828438	0.537695	0.268981	1	0.884895	0.806592	1.18522	0.831539	0.505484	0.852213
AT1G29880.1	81944	| glycyl-tRNA synthetase / glycine-tRNA ligase | Chr1:10459662-10462781 REVERSE LENGTH=729 | 201606	46	46	0.0801407	0.0104379	0.00372842	1	0.923946	0.914341	1.06399	1.01783	0.891668	0.876486	1	1.05847	0.866124	0.974939	0.900189	0.754498	0.774259	1	1.30903	1.12347	1.32752	1.09935	0.888218	1.03562
AT1G29900.1	129957	| carbamoyl phosphate synthetase B | Chr1:10468164-10471976 FORWARD LENGTH=1187 | 201606	61	61	0.0127126	0.000145225	8.40814e-05	1	1.11667	0.99554	1.04661	1.08279	0.80201	0.853838	1	0.884145	0.758558	0.904286	0.603302	0.607005	0.610247	1	0.772855	0.681195	0.869464	0.660429	0.532984	0.763297
AT1G29910.1	28227	| chlorophyll A/B binding protein 3 | Chr1:10472443-10473246 REVERSE LENGTH=267 | 201606	105	13	0.0278072	0.548545	0.328406	1	0.937997	1.02231	0.969266	0.897147	1.12564	0.800578	1	1.0103	1.12906	1.11969	1.09976	1.25714	1.1465	1	0.884857	1.27219	1.07398	1.17438	1.12226	1.05068
AT1G29930.1	28241	| chlorophyll A/B binding protein 1 | Chr1:10478071-10478874 FORWARD LENGTH=267 | 201606	108	12	4.23378e-13	2.05782e-09	7.6152e-07	1	0.887847	0.866903	0.891703	0.99196	6683.07	4753.13	1	0.921884	0.846091	0.838015	0.825627	6237.18	5688.23	1	0.965456	0.967021	0.948178	0.903506	6870.23	6432.07
AT1G29970.2	36075	| 60S ribosomal protein L18A-1 | Chr1:10498458-10501311 REVERSE LENGTH=312 | 201606	13	1	4.97885e-11	2.2288e-11	3.87449e-13	1	0.887847	199.513	0.891703	0.99196	0.862579	0.903238	1	0.921884	165.882	0.838015	0.825627	0.806983	0.793008	1	0.965456	207.857	0.948178	0.903506	0.869703	0.928317
AT1G30000.1	69069	| alpha-mannosidase 3 | Chr1:10509532-10512320 REVERSE LENGTH=624 | 201606	4	4	0.00799411	0.000442179	0.0266948	1	3.74267	4.95089	0.218722	1.71691	4.92795	0.882379	1	0.134725	3.28823	0.479456	1.59416	1.56625	1.92266	1	3.85991	12.6653	3.78095	9.03506	31.7085	18.5493
AT1G30120.1	44245	| pyruvate dehydrogenase E1 beta | Chr1:10584350-10586477 REVERSE LENGTH=406 | 201606	11	3	0.000164633	5.97563e-05	9.11909e-07	1	0.355313	0.960649	0.986597	0.649514	0.00469757	0.557351	1	0.649923	1.3188	0.977751	0.739844	0.00685766	0.224295	1	0.908201	0.793329	1.08156	0.824894	0.00766355	0.654403
AT1G30230.1	25132	| translation elongation factor EF1B/ribosomal protein S6 family protein | Chr1:10639286-10640515 FORWARD LENGTH=231 | 201606	27	19	0.0182587	0.00734861	0.230162	1	1.43067	1.1867	1.17581	1.28474	0.977764	1.21482	1	1.16766	1.40944	1.13634	1.15772	0.937344	0.948793	1	1.18263	0.962103	0.925277	0.92837	0.959938	1.04203
AT1G30360.1	81935	| Early-responsive to dehydration stress protein (ERD4) | Chr1:10715892-10718799 FORWARD LENGTH=724 | 201606	47	47	4.14114e-06	0.129022	0.0826433	1	1.65919	1.27901	1.05901	0.930682	1.24689	0.358834	1	0.82449	0.782989	0.730966	0.646955	1.0765	0.744685	1	1.3265	1.24292	1.11623	0.864743	0.77878	0.64424
AT1G30380.1	13206	| photosystem I subunit K | Chr1:10722325-10723013 FORWARD LENGTH=130 | 201606	8	8	0.00177127	0.00264056	0.011305	1	2.73915	2.13473	1.99042	1.93636	1.91897	1.45663	1	2.37789	1.90928	1.87811	1.29057	2.23881	1.44685	1	0.823322	0.599659	0.574032	0.598471	0.671197	0.42638
AT1G30400.1	181926	| multidrug resistance-associated protein 1 | Chr1:10728139-10737697 FORWARD LENGTH=1622 | 201606	19	13	8.70696e-05	0.00564194	0.0801919	1	0.997329	0.906704	0.413887	0.651527	0.569351	0.0421575	1	0.616066	0.382455	0.466187	1.43369	1.01871	0.723288	1	0.514201	1.28191	0.849475	1.0521	0.745831	0.555559
AT1G30470.1	89888	| SIT4 phosphatase-associated family protein | Chr1:10779423-10786415 FORWARD LENGTH=811 | 201606	8	8	0.000350642	0.28321	0.237009	1	2.38527	2.32502	3.73663	1.01475	2.31224	0.912031	1	1.12785	1.91352	1.89766	1.06471	1.91396	1.55377	1	1.90749	1.7536	2.08737	0.794413	1.71781	1.48504
AT1G30510.1	42661	| root FNR 2 | Chr1:10807150-10808984 REVERSE LENGTH=381 | 201606	5	2	0.481831	0.0242949	0.105672	1	3.16582	3.4628	2.38811	3.54313	2.28707	3.21734	1	0.902473	1.93532	1.36524	1.31432	2.09792	3.36994	1	1.84386	1.83324	2.73263	1.72264	2.4919	3.54529
AT1G30530.1	50095	| UDP-glucosyl transferase 78D1 | Chr1:10814917-10816374 FORWARD LENGTH=453 | 201606	14	14	0.0453518	0.00323066	0.0186436	1	0.892463	0.513196	0.468406	0.759349	0.766064	0.21425	1	0.394306	0.517241	0.722984	0.726423	1.15896	1.08328	1	0.500386	1.01615	0.648003	0.717715	0.360492	1.09132
AT1G30580.1	44471	| GTP binding protein | Chr1:10831953-10835454 REVERSE LENGTH=394 | 201606	32	32	0.0153177	0.0678781	0.022964	1	1.04403	0.884244	0.907999	0.94502	1.03919	1.22969	1	1.07845	1.13008	1.00109	1.14026	0.842871	0.997077	1	1.11007	0.88406	1.03639	1.15407	0.89707	1.22442
AT1G30630.1	32602	| Coatomer epsilon subunit | Chr1:10858546-10860173 REVERSE LENGTH=292 | 201606	13	13	0.00938578	0.0350973	0.186959	1	1.04244	1.17553	0.913373	0.745774	0.495341	0.354769	1	1.4371	1.32466	1.38923	1.93492	1.04433	1.16905	1	0.881723	0.827765	1.07888	0.692895	1.07442	0.683322
AT1G30690.1	61190	| Sec14p-like phosphatidylinositol transfer family protein | Chr1:10888284-10890085 FORWARD LENGTH=540 | 201606	16	16	0.00125946	0.00141406	0.000606707	1	1.64482	2.17073	2.13161	1.37574	1.3945	1.52988	1	1.58075	1.50699	1.6718	1.0261	1.26824	1.16475	1	1.81647	1.63054	1.0895	1.08613	0.994496	0.845812
AT1G30700.1	59514	| FAD-binding Berberine family protein | Chr1:10892623-10894437 FORWARD LENGTH=527 | 201606	6	6	1.91932e-05	0.000221617	6.78784e-09	1	0.887847	0.866903	0.891703	0.99196	0.862579	0.903238	1	0.921884	0.846091	0.838015	0.825627	0.806983	0.793008	1	0.965456	0.967021	0.948178	0.903506	57.7996	6.47562
AT1G30720.1	58879	| FAD-binding Berberine family protein | Chr1:10898197-10899780 FORWARD LENGTH=527 | 201606	3	3	1.91932e-05	0.465906	0.00322528	1	0.887847	0.866903	0.891703	0.99196	0.862579	0.903238	1	0.921884	0.846091	0.838015	5.73466	0.806983	0.793008	1	0.965456	0.967021	0.948178	3.58081	43.1094	3.70963
AT1G30890.1	30028	| Integral membrane HRF1 family protein | Chr1:10994890-10995999 FORWARD LENGTH=269 | 201606	2	1	0.771056	0.05016	0.199751	1	1.01298	0.993201	1.0228	1.12112	0.621438	1.16791	1	0.611761	0.559595	0.838015	1.35263	0.941408	1.05682	1	1.34468	2.05981	1.31485	1.07997	1.20313	0.923186
AT1G30900.1	70258	| VACUOLAR SORTING RECEPTOR 6 | Chr1:10997275-11000543 FORWARD LENGTH=631 | 201606	4	3	0.0233751	3.557e-06	3.62014e-07	1	0.887847	0.866903	0.891703	0.99196	17.644	6.33827	1	0.921884	0.846091	11.1944	32.6568	8.06983	21.168	1	0.244971	0.245368	4.00314	6.12645	17.6175	6.2866
AT1G30910.1	35192	| Molybdenum cofactor sulfurase family protein | Chr1:11000912-11002801 FORWARD LENGTH=318 | 201606	5	5	0.278665	0.111881	0.833154	1	0.669126	0.541187	1.44347	0.985036	0.639154	1.12815	1	1.29152	0.634697	1.26464	0.929929	0.215335	0.699366	1	0.720773	1.14071	0.921926	0.675426	0.432749	0.809485
AT1G31170.1	13914	| sulfiredoxin | Chr1:11133521-11134228 FORWARD LENGTH=125 | 201606	3	3	0.028202	0.0271689	0.00139798	1	0.887847	3.42843	8.91703	0.99196	0.862579	9.31388	1	0.921884	3.44016	8.38015	0.825627	0.806983	8.11381	1	0.965456	0.967021	12.5872	0.903506	0.869703	21.6567
AT1G31170.4	21715	| sulfiredoxin | Chr1:11133521-11134686 FORWARD LENGTH=198 | 201606	2	2	0.081344	0.2924	0.00312234	1	0.226751	0.875602	2.27736	0.253341	0.220298	2.37872	1	0.124453	0.464417	1.13131	0.111459	0.108942	1.09535	1	0.240178	0.240568	3.13133	0.224767	0.216358	5.38758
AT1G31180.1	43847	| isopropylmalate dehydrogenase 3 | Chr1:11142843-11144617 REVERSE LENGTH=404 | 201606	31	11	0.00610641	0.350412	0.2762	1	0.783937	1.0164	0.919163	0.950829	1.12344	1.29795	1	0.89063	0.915548	0.97204	0.809053	0.880522	0.832851	1	0.956348	0.944606	0.887196	1.05375	0.917722	1.01421
AT1G31190.1	40445	| myo-inositol monophosphatase like 1 | Chr1:11144861-11146800 FORWARD LENGTH=371 | 201606	16	16	0.0324157	0.00395314	0.0668223	1	0.724548	0.798345	0.773426	0.911306	1.02929	1.12547	1	1.47114	1.06996	1.14033	0.900666	1.08433	1.00096	1	0.965171	0.803654	0.827172	0.923409	0.717819	0.77807
AT1G31220.1	32170	| Formyl transferase | Chr1:11157064-11158408 FORWARD LENGTH=292 | 201606	6	6	0.00269713	0.0503797	0.00352456	1	1.97769	1.28324	1.75952	0.73635	2.55905	3.35154	1	2.17056	1.98791	2.25111	2.39858	3.50591	3.18404	1	1.44657	0.630308	1.57964	1.04817	2.75811	1.85955
AT1G31230.1	99404	| aspartate kinase-homoserine dehydrogenase i | Chr1:11158744-11163055 REVERSE LENGTH=911 | 201606	20	14	0.000744896	0.00027818	6.11197e-07	1	0.781428	0.691812	0.893537	0.892823	0.490584	0.23993	1	0.528422	0.454281	0.437121	0.437354	0.408518	0.400126	1	0.346763	0.353948	0.316402	0.427586	0.234198	0.297442
AT1G31330.1	24173	| photosystem I subunit F | Chr1:11215011-11215939 REVERSE LENGTH=221 | 201606	58	58	0.000750277	0.0365875	0.000225724	1	0.959337	0.979392	0.828914	0.875594	0.927527	0.581991	1	0.869864	0.844991	0.739319	0.707331	0.944277	0.802716	1	0.980227	1.10278	0.986993	0.89637	0.833825	0.765621
AT1G31410.1	58292	| putrescine-binding periplasmic protein-like protein | Chr1:11247094-11249345 REVERSE LENGTH=524 | 201606	3	3	0.519208	0.00900002	0.729906	1	0.755752	0.736716	0.395824	0.447463	0.493824	0.767484	1	0.761118	0.559595	0.973724	0.276894	0.537916	0.657813	1	0.975832	1.16346	0.754795	0.718646	0.867404	0.554812
AT1G31440.1	49258	| SH3 domain-containing protein | Chr1:11256150-11258479 REVERSE LENGTH=439 | 201606	7	7	0.0145964	0.0983606	0.0300859	1	1.29585	1.26259	1.592	0.884446	1.74052	1.92607	1	1.47572	1.48749	1.26027	1.42049	1.91457	2.85988	1	0.481467	1.39058	0.818839	1.24066	1.95576	1.39079
AT1G31690.1	76674	| Copper amine oxidase family protein | Chr1:11343980-11347767 FORWARD LENGTH=677 | 201606	4	4	0.0259153	0.0296648	0.522209	1	1.5131	0.259684	0.757151	0.722679	0.491175	0.386962	1	0.825071	0.654166	0.280608	0.362975	0.714855	0.104072	1	0.557141	0.547078	0.545331	0.519213	0.504215	0.668985
AT1G31730.1	103735	| Adaptin family protein | Chr1:11359907-11363916 FORWARD LENGTH=938 | 201606	13	13	0.00536633	0.000868666	0.0691891	1	1.33657	1.37281	0.837415	0.421661	0.373933	0.135911	1	1.10412	2.10175	1.15677	1.9522	0.896588	0.876335	1	2.45555	2.0057	1.79344	1.59691	1.45026	0.922105
AT1G31800.1	66846	| cytochrome P450%2C family 97%2C subfamily A%2C polypeptide 3 | Chr1:11396440-11399470 FORWARD LENGTH=595 | 201606	11	11	0.000533727	7.86326e-06	0.00148697	1	1.07902	0.78976	0.576066	0.722813	0.444686	0.124734	1	1.29525	0.594169	0.440476	0.381935	0.616825	0.18502	1	0.501843	0.261132	0.337212	0.502333	0.138184	0.15123
AT1G31812.1	10386	| acyl-CoA-binding protein 6 | Chr1:11411132-11412099 REVERSE LENGTH=92 | 201606	7	7	0.00229607	0.0412401	0.00970622	1	0.476703	1.0682	1.30705	1.13668	0.599907	2.01667	1	3.12656	3.30267	2.1614	1.52995	1.65242	2.41944	1	2.18857	1.33437	1.46061	2.28374	0.767198	2.69218
AT1G31860.1	31668	| histidine biosynthesis bifunctional protein (HISIE) | Chr1:11434250-11436530 REVERSE LENGTH=281 | 201606	8	8	0.127093	0.55787	0.683918	1	0.685809	3.70388	2.43031	0.776016	1.92929	2.7235	1	1.06355	1.12276	1.78939	0.820823	1.46011	0.533017	1	1.36065	1.16194	0.800946	1.08698	1.74069	1.12559
AT1G31860.2	22884	| histidine biosynthesis bifunctional protein (HISIE) | Chr1:11434250-11435101 REVERSE LENGTH=201 | 201606	6	6	0.116013	0.00646897	0.00174331	1	0.0670607	0.0654787	0.0673519	0.776016	0.0651521	0.0682232	1	0.045826	0.0420584	0.0416569	0.820823	0.0401143	0.0394197	1	0.0583858	0.0584805	0.0573409	1.08698	0.0525952	0.0561398
AT1G31910.1	54409	| GHMP kinase family protein | Chr1:11459050-11461649 FORWARD LENGTH=505 | 201606	7	7	0.340801	0.017053	0.0565591	1	1.33212	1.73774	1.11501	1.24861	1.50646	1.13444	1	1.56416	2.55149	1.96202	3.2811	2.56849	2.9322	1	3.04882	1.61014	1.62357	2.45831	2.10889	1.19492
AT1G31910.2	49241	| GHMP kinase family protein | Chr1:11459050-11461386 FORWARD LENGTH=450 | 201606	6	6	8.62887e-06	7.85963e-08	0.00107439	1	0.887847	46.1913	0.891703	0.99196	40.0435	30.1549	1	0.921884	50.6835	0.838015	0.825627	51.0213	58.2461	1	0.965456	37.4645	0.948178	0.903506	49.0695	27.8033
AT1G32060.1	44464	| phosphoribulokinase | Chr1:11532668-11534406 FORWARD LENGTH=395 | 201606	92	92	4.13487e-05	0.00677555	0.0359889	1	0.86885	1.03483	1.13269	1.11606	0.995325	1.32163	1	1.13153	1.04989	1.08361	0.855418	0.844386	0.885912	1	1.02114	0.955078	0.979306	0.940059	0.799544	1.00523
AT1G32070.1	28562	| nuclear shuttle interacting | Chr1:11534851-11536289 REVERSE LENGTH=257 | 201606	3	3	0.0172543	0.102704	0.462903	1	0.661646	0.969057	1.21195	1.72025	0.649049	1.00894	1	0.91016	0.746637	0.740855	0.449982	0.535566	0.521923	1	1.2423	1.27022	1.09677	0.776612	0.625655	1.06608
AT1G32080.1	54017	| membrane protein | Chr1:11537572-11539756 REVERSE LENGTH=512 | 201606	11	11	0.528775	0.0235764	0.361717	1	1.68023	1.75313	1.15947	1.32763	1.70946	1.29323	1	1.42413	2.20261	1.75936	2.05608	2.96533	2.32582	1	2.00458	3.33157	2.81783	2.66319	3.35156	2.05154
AT1G32160.1	45868	| beta-casein (DUF760) | Chr1:11568701-11570241 FORWARD LENGTH=406 | 201606	11	11	0.00189583	0.411785	0.0205654	1	1.86621	1.98492	1.7103	1.27218	2.20144	0.826621	1	0.990615	1.06998	1.17768	0.941099	1.57003	1.17021	1	0.862114	1.35232	1.14231	1.04048	1.36937	0.534938
AT1G32200.1	50421	| phospholipid/glycerol acyltransferase family protein | Chr1:11602223-11605001 REVERSE LENGTH=459 | 201606	25	25	0.00413702	7.03073e-08	4.37553e-05	1	0.80218	0.71532	0.743444	0.891751	0.426004	0.756262	1	1.21757	0.694191	0.647694	0.499252	0.434425	0.40711	1	0.732735	0.583422	0.630155	0.5271	0.362064	0.492687
AT1G32220.1	31979	| NAD(P)-binding Rossmann-fold superfamily protein | Chr1:11608038-11609591 FORWARD LENGTH=296 | 201606	17	17	4.07712e-05	2.3456e-05	0.00319988	1	1.39421	1.36227	1.33858	1.46462	1.83277	1.88682	1	1.34255	1.05064	1.17088	1.06153	1.90271	2.2484	1	1.40363	1.10277	0.97623	1.28379	1.60712	1.56795
AT1G32350.1	36202	| alternative oxidase 1D | Chr1:11667237-11668569 REVERSE LENGTH=318 | 201606	6	5	1.91932e-05	1.11973e-07	1.8357e-05	1	0.887847	0.866903	0.891703	0.99196	0.862579	0.903238	1	0.921884	0.846091	0.838015	37.8242	3.22662	0.793008	1	0.965456	0.967021	22.1111	3.58081	75.0169	0.928317
AT1G32350.2	35219	| alternative oxidase 1D | Chr1:11667361-11668569 REVERSE LENGTH=309 | 201606	2	2	1.91932e-05	0.000221617	2.1928e-08	1	0.887847	0.866903	0.891703	0.99196	0.862579	0.903238	1	0.921884	0.846091	0.838015	0.825627	0.806983	0.793008	1	0.965456	0.967021	22.1111	0.903506	0.869703	0.928317
AT1G32380.1	43333	| phosphoribosyl pyrophosphate (PRPP) synthase 2 | Chr1:11682033-11684229 FORWARD LENGTH=400 | 201606	5	1	6.23995e-07	1.97964e-06	3.17858e-06	1	0.887847	23.1098	0.891703	29.8024	0.862579	0.903238	1	15.6937	22.5004	0.838015	40.8446	0.806983	0.793008	1	12.8448	22.4667	0.948178	27.0091	0.869703	0.928317
AT1G32400.1	31556	| tobamovirus multiplication 2A | Chr1:11689393-11690873 REVERSE LENGTH=280 | 201606	3	3	0.00210646	0.0107324	0.339328	1	1.95838	2.12118	0.0653233	0.0726678	1.04571	0.464321	1	0.921884	5.89805	3.28079	0.825627	16.1397	15.8918	1	1.78535	3.42183	1.35308	0.12533	2.42662	0.512457
AT1G32400.2	31556	| tobamovirus multiplication 2A | Chr1:11689393-11690873 REVERSE LENGTH=280 | 201606	3	3	0.00210646	0.00581415	0.148325	1	1.95838	2.12118	0.0653233	0.0726678	1.04571	0.464321	1	0.921884	5.89805	0.838015	0.825627	16.1397	15.8918	1	1.78535	3.42183	0.131527	0.12533	2.42662	0.512457
AT1G32440.1	62615	| plastidial pyruvate kinase 3 | Chr1:11712205-11714963 FORWARD LENGTH=571 | 201606	13	11	0.001657	0.00413683	0.839634	1	0.61574	0.629959	1.02294	0.840701	0.441646	0.519484	1	0.773979	0.875809	1.1148	0.660803	0.445863	0.466737	1	1.40367	0.991634	1.17429	1.04379	1.00006	1.02451
AT1G32470.1	17897	| Single hybrid motif superfamily protein | Chr1:11739479-11740246 REVERSE LENGTH=166 | 201606	27	16	0.000136525	0.575485	0.351133	1	1.23294	1.0932	1.20162	1.28037	1.34648	1.64838	1	1.03395	0.895614	1.00213	0.945882	0.92267	0.874171	1	0.960971	1.06661	0.948679	0.89239	0.894081	0.939935
AT1G32500.1	52825	| non-intrinsic ABC protein 6 | Chr1:11750091-11751994 REVERSE LENGTH=475 | 201606	10	10	0.900093	4.46912e-05	0.000399485	1	0.983482	0.906649	0.88484	0.823168	0.721885	0.99739	1	0.51447	0.527651	0.444811	0.356015	0.328792	0.421341	1	0.63325	0.527721	0.457044	0.74707	0.418649	0.609303
AT1G32550.1	20377	| 2Fe-2S ferredoxin-like superfamily protein | Chr1:11771969-11774117 REVERSE LENGTH=181 | 201606	5	5	0.299041	0.0853721	0.0050073	1	0.719903	0.6283	0.806578	0.980939	0.543416	0.980644	1	0.76177	0.630744	0.847115	0.227705	0.297973	0.220478	1	0.549247	0.334675	0.272951	0.385953	0.373639	0.529185
AT1G32550.2	21916	| 2Fe-2S ferredoxin-like superfamily protein | Chr1:11771969-11774117 REVERSE LENGTH=194 | 201606	5	5	0.00018557	0.0046571	7.9417e-05	1	0.0240851	0.6283	0.806578	0.0269094	0.543416	0.0245027	1	0.0256309	0.630744	0.847115	0.0229547	0.297973	0.0220478	1	0.0206208	0.334675	0.272951	0.0192977	0.373639	0.0198276
AT1G32900.1	66879	| UDP-Glycosyltransferase superfamily protein | Chr1:11920582-11923506 REVERSE LENGTH=610 | 201606	19	19	6.2591e-09	1.43226e-08	1.29843e-07	1	0.803597	0.52725	0.00417368	1.09292	0.00403737	0.23914	1	0.838735	0.331673	0.00615106	0.21703	0.00592328	0.425131	1	0.886843	0.717633	0.00768657	0.780555	0.00705039	0.601532
AT1G32940.1	82912	| Subtilase family protein | Chr1:11937634-11940856 FORWARD LENGTH=774 | 201606	6	6	1.91932e-05	5.38142e-06	2.55039e-10	1	0.887847	0.866903	0.891703	0.99196	0.862579	0.903238	1	0.921884	8.46091	0.838015	55.6469	3.26737	21.0364	1	0.965456	3.78069	15.7768	33.0694	107.145	15.476
AT1G32940.2	77077	| Subtilase family protein | Chr1:11937869-11940856 FORWARD LENGTH=723 | 201606	7	6	1.91932e-05	5.38142e-06	9.59065e-12	1	0.887847	0.866903	0.891703	0.99196	0.862579	0.903238	1	0.921884	8.46091	0.838015	55.6469	3.26737	21.0364	1	0.965456	3.78069	0.948178	33.0694	107.145	15.476
AT1G32960.1	83640	| Subtilase family protein | Chr1:11945351-11948429 FORWARD LENGTH=777 | 201606	2	1	1.91932e-05	0.0364661	1.16147e-06	1	0.887847	0.866903	0.891703	0.99196	0.862579	0.903238	1	0.921884	8.46091	0.838015	16.078	0.806983	0.793008	1	0.965456	3.78069	0.948178	21.0449	0.869703	0.928317
AT1G32990.1	23148	| plastid ribosomal protein l11 | Chr1:11955827-11957139 FORWARD LENGTH=222 | 201606	14	14	0.000285598	2.10729e-07	2.9909e-05	1	1.1577	1.04426	1.08454	1.09676	0.671063	1.2213	1	1.71056	1.42362	1.00968	0.750194	0.736945	0.594886	1	0.896892	0.559558	0.608093	0.619083	0.377464	0.527879
AT1G33040.1	22780	| nascent polypeptide-associated complex subunit alpha-like protein 5 | Chr1:11966547-11967696 FORWARD LENGTH=209 | 201606	2	2	0.0239692	0.000807046	0.00378557	1	0.76521	0.7406	0.390748	0.567121	0.0369543	0.154117	1	1.05717	0.261034	0.259303	0.248043	0.0349048	0.0343003	1	0.775189	0.220287	0.0569657	0.555494	0.052251	0.0557724
AT1G33120.1	22018	| Ribosomal protein L6 family | Chr1:12010986-12012223 FORWARD LENGTH=194 | 201606	31	27	5.30407e-05	0.000293737	0.0028998	1	0.918177	0.831673	1.02806	1.11298	0.738146	0.625294	1	0.918154	0.883802	0.793542	0.880102	0.626966	0.600795	1	1.07627	0.836269	0.895217	0.831747	0.674392	0.742867
AT1G33170.1	73186	| S-adenosyl-L-methionine-dependent methyltransferases superfamily protein | Chr1:12027262-12030397 FORWARD LENGTH=639 | 201606	2	2	1.32341e-05	2.24866e-08	4.55536e-24	1	0.665464	0.0649765	0.0668353	0.0743499	0.0646524	0.0677	1	0.771066	0.0423045	0.0419007	0.0412814	0.0403492	0.0396504	1	0.965456	0.0967021	0.0948178	0.0903506	0.0869703	0.0928317
AT1G33240.1	74213	| GT-2-like 1 | Chr1:12051859-12054320 REVERSE LENGTH=669 | 201606	5	5	0.00443433	0.0291623	0.388268	1	2.20591	0.715312	0.444142	0.988156	0.860736	1.49914	1	2.49789	1.25412	1.25335	0.240238	1.20388	0.603396	1	0.980954	0.949014	0.758757	0.376772	0.53178	0.391546
AT1G33240.2	71327	| GT-2-like 1 | Chr1:12051859-12053833 REVERSE LENGTH=630 | 201606	4	4	0.00193493	0.00284305	0.0146797	1	0.887847	14.3613	8.91703	19.8392	17.281	30.0981	1	0.921884	16.7705	16.7603	3.21255	16.0987	8.06883	1	0.965456	15.7961	12.6293	6.27126	8.85134	6.51718
AT1G33590.1	51742	| Leucine-rich repeat (LRR) family protein | Chr1:12177788-12179221 FORWARD LENGTH=477 | 201606	26	25	0.0598593	0.00485292	0.000245527	1	0.990639	0.559731	0.752176	1.17155	0.963162	0.802668	1	1.20296	0.783491	0.96705	1.32815	1.24625	1.35273	1	1.36823	0.701327	1.07744	0.940962	1.36391	1.29059
AT1G33600.1	52471	| Leucine-rich repeat (LRR) family protein | Chr1:12180776-12182212 FORWARD LENGTH=478 | 201606	11	10	0.153512	0.0136192	0.00217698	1	1.35054	0.659957	0.937347	0.991088	1.30995	0.795663	1	1.77357	2.15013	1.3568	1.90184	2.53223	2.73214	1	2.88084	1.42913	2.04634	1.64285	2.02171	2.07553
AT1G33610.1	52666	| Leucine-rich repeat (LRR) family protein | Chr1:12188910-12190346 FORWARD LENGTH=478 | 201606	2	1	3.64613e-05	0.000143008	4.14354e-07	1	14.7671	17.3097	20.8821	0.99196	31.4968	0.903238	1	12.4342	33.9256	13.9086	0.825627	21.5619	0.793008	1	41.8085	12.7965	28.2952	0.903506	34.8876	0.928317
AT1G33612.1	49976	| Leucine-rich repeat (LRR) family protein | Chr1:12191312-12192679 FORWARD LENGTH=455 | 201606	3	1	1.16146e-06	5.5643e-09	1.49323e-08	1	29.5208	0.866903	0.891703	0.99196	0.862579	0.903238	1	21.4248	0.846091	0.838015	0.825627	0.806983	0.793008	1	22.4994	0.967021	0.948178	0.903506	0.869703	0.928317
AT1G33680.1	80439	| KH domain-containing protein | Chr1:12204056-12208282 FORWARD LENGTH=763 | 201606	4	4	0.135071	0.738053	0.011264	1	1.53932	0.663819	0.891669	0.977759	0.654726	1.79627	1	1.17544	0.644908	1.28513	1.02318	1.22987	1.60343	1	1.69772	0.964472	0.714641	0.697974	2.41153	1.8661
AT1G33810.1	15698	| zinc finger/BTB domain protein | Chr1:12265084-12266655 FORWARD LENGTH=138 | 201606	7	7	0.239708	0.0838585	0.0211661	1	1.28549	1.65459	1.7043	1.72062	1.71015	1.99737	1	1.71029	1.27657	2.04896	1.56915	1.56296	1.66903	1	2.00861	1.26848	1.38481	1.32231	1.54095	2.00271
AT1G33960.1	40070	| P-loop containing nucleoside triphosphate hydrolases superfamily protein | Chr1:12346555-12348184 FORWARD LENGTH=353 | 201606	7	7	0.000118532	1.70107e-06	4.53236e-08	1	0.128244	1.67068	0.128801	0.143282	3.30781	2.60648	1	0.921884	22.6517	5.84733	99.749	0.806983	8.24546	1	0.965456	0.967021	37.5552	57.2812	112.929	18.5663
AT1G34000.1	18665	| one-helix protein 2 | Chr1:12358151-12358902 REVERSE LENGTH=172 | 201606	5	5	0.000272029	0.000112631	0.00393298	1	2.32922	1.90922	0.029447	0.0327578	1.52354	2.78362	1	1.55985	0.837978	0.0250093	0.0246396	0.727641	1.02734	1	0.958619	0.831597	0.017713	0.0168785	0.538538	1.15426
AT1G34060.1	52430	| Pyridoxal phosphate (PLP)-dependent transferases superfamily protein | Chr1:12396561-12398299 REVERSE LENGTH=463 | 201606	4	4	8.27042e-14	0.000223774	0.00173374	1	0.887847	0.866903	0.891703	0.99196	45.968	0.903238	1	0.921884	0.846091	0.838015	0.825627	26.898	20.923	1	0.965456	12.6698	0.948178	0.903506	14.4582	9.28317
AT1G34130.1	82980	| staurosporin and temperature sensitive 3-like b | Chr1:12430000-12432985 FORWARD LENGTH=735 | 201606	3	3	0.142226	0.0332988	0.0144499	1	1.07091	0.866118	0.721604	0.98694	0.520214	0.38051	1	0.921884	0.988472	0.419007	0.936397	1.21047	0.788925	1	0.722903	1.18276	1.6473	0.676516	2.37092	1.39237
AT1G34220.1	72574	| Regulator of Vps4 activity in the MVB pathway protein | Chr1:12463102-12465911 REVERSE LENGTH=649 | 201606	8	8	0.000242341	0.0802055	0.247387	1	4.71801	3.75506	2.3703	0.679254	3.18313	2.10582	1	0.840584	1.73072	0.594393	1.00899	0.580278	0.558949	1	1.18457	1.1729	0.641742	0.805504	0.489276	0.62131
AT1G34430.1	48307	| 2-oxoacid dehydrogenases acyltransferase family protein | Chr1:12588027-12590084 REVERSE LENGTH=465 | 201606	20	17	3.53569e-06	2.47631e-05	0.000753101	1	0.814771	0.507402	0.80825	0.826781	0.472183	0.657145	1	0.906741	0.674377	0.659974	0.632366	0.326179	0.347696	1	0.761004	0.614313	0.73503	0.561379	0.366048	0.628979
AT1G34750.1	30984	| Protein phosphatase 2C family protein | Chr1:12736386-12737727 REVERSE LENGTH=282 | 201606	5	5	0.000744351	0.0494972	9.99489e-07	1	1.70557	3.06493	2.29214	0.679398	3.01205	4.91598	1	5.55924	8.90995	2.94985	5.6151	8.48948	7.62064	1	2.17486	2.16921	2.74646	3.48942	6.15189	5.08395
AT1G34760.1	29122	| general regulatory factor 11 | Chr1:12744062-12745603 REVERSE LENGTH=255 | 201606	8	4	0.00139318	0.000334945	0.00523384	1	1.373	1.82251	1.53076	1.26319	0.023646	0.0247606	1	0.644033	1.01056	0.889737	0.808842	0.0151584	0.0148959	1	1.7163	1.33487	1.87156	1.70562	0.0289901	0.0309439
AT1G34760.2	28781	| general regulatory factor 11 | Chr1:12743981-12745603 REVERSE LENGTH=252 | 201606	8	4	0.155034	0.589599	0.228426	1	1.373	1.82251	1.53076	1.26319	1.25554	0.576728	1	0.644033	1.01056	0.889737	0.808842	0.857385	0.991923	1	1.7163	1.33487	1.87156	1.70562	2.32216	1.03019
AT1G35140.1	33186	| Phosphate-responsive 1 family protein | Chr1:12852089-12853018 FORWARD LENGTH=309 | 201606	2	2	0.000324882	9.95729e-05	2.42269e-09	1	17.7636	0.866903	11.9651	0.99196	0.862579	0.903238	1	18.4085	0.846091	0.838015	0.825627	0.806983	0.793008	1	25.7154	0.967021	0.948178	0.903506	0.869703	0.928317
AT1G35160.1	30194	| GF14 protein phi chain | Chr1:12867264-12868514 FORWARD LENGTH=267 | 201606	44	15	0.000340559	0.0104518	0.00147305	1	1.13329	1.26692	1.31243	1.14942	1.18022	1.28994	1	1.07692	1.3748	1.33132	1.30659	1.28546	1.18791	1	1.09195	1.2339	1.28961	1.2616	1.40888	1.23362
AT1G35220.1	111286	| FAM91 carboxy-terminus protein | Chr1:12909293-12913916 FORWARD LENGTH=1005 | 201606	4	4	0.00202336	0.40527	0.00203729	1	0.263663	0.46131	0.0673519	0.0749245	0.0651521	0.0682232	1	1.49741	0.498185	0.122468	0.120658	1.61215	0.115891	1	5.24336	1.73512	0.128566	0.122509	1.20617	0.125873
AT1G35220.2	111286	| FAM91 carboxy-terminus protein | Chr1:12909293-12913916 FORWARD LENGTH=1005 | 201606	3	3	0.00202336	0.543199	0.00294036	1	0.263663	0.46131	0.0673519	0.0749245	0.0651521	0.0682232	1	1.49741	0.498185	0.122468	0.120658	1.61215	1.18576	1	5.24336	1.73512	0.128566	0.122509	1.20617	0.500922
AT1G35340.1	35320	| ATP-dependent protease La (LON) domain protein | Chr1:12977768-12979749 FORWARD LENGTH=316 | 201606	2	2	0.0542503	0.00161418	0.0600322	1	0.374425	1.20427	0.713885	0.405269	0.363774	0.393234	1	0.380394	0.508846	0.351663	0.333053	0.0485326	0.0476921	1	0.40402	0.387297	0.22597	0.717773	0.367216	0.221707
AT1G35340.3	35666	| ATP-dependent protease La (LON) domain protein | Chr1:12977768-12979560 FORWARD LENGTH=314 | 201606	2	2	0.000106929	0.00345033	0.184421	1	6.27557	20.1842	11.9651	0.99196	6.09706	0.903238	1	6.32505	8.46091	5.84733	0.825627	0.806983	0.793008	1	6.76011	6.48029	3.78095	0.903506	6.14429	0.928317
AT1G35420.1	34167	| alpha/beta-Hydrolases superfamily protein | Chr1:13026320-13027463 FORWARD LENGTH=310 | 201606	11	11	0.184492	0.00252542	0.0323714	1	0.771282	0.865512	1.33392	1.03345	0.899094	1.23259	1	1.25694	0.579846	0.672036	0.60137	0.679269	0.855676	1	1.24069	1.02969	0.718949	0.860375	0.666252	1.50452
AT1G35420.2	34790	| alpha/beta-Hydrolases superfamily protein | Chr1:13026320-13027463 FORWARD LENGTH=315 | 201606	10	10	9.12413e-06	8.01679e-07	5.12219e-06	1	0.887847	63.4782	97.832	75.7949	65.9411	90.4005	1	0.921884	48.1858	55.8468	49.9744	56.4479	71.1074	1	0.965456	72.0341	50.2954	60.1891	46.6089	105.251
AT1G35460.1	28527	| basic helix-loop-helix (bHLH) DNA-binding superfamily protein | Chr1:13040092-13041907 FORWARD LENGTH=259 | 201606	2	2	0.0194544	0.00494176	0.553941	1	1.1875	2.01842	0.0891703	0.99196	1.42746	2.11225	1	1.36516	3.31034	0.122468	1.58416	3.14509	1.58091	1	0.943865	0.963568	0.0926973	1.222	1.72428	1.20802
AT1G35580.1	62834	| cytosolic invertase 1 | Chr1:13122460-13124808 REVERSE LENGTH=551 | 201606	18	16	0.000503073	0.0534446	0.024665	1	1.46696	1.35288	1.11609	0.392317	0.955181	0.271688	1	1.3517	2.15467	1.8236	2.41341	1.62828	1.72564	1	1.30538	0.917845	1.81106	1.18285	1.55053	1.01212
AT1G35620.1	49851	| PDI-like 5-2 | Chr1:13156504-13158280 FORWARD LENGTH=440 | 201606	12	12	0.00775585	0.00440926	0.0507291	1	1.95402	2.34571	1.42535	1.28177	2.15819	1.44837	1	1.33541	1.81805	1.21403	1.62842	2.22074	1.94394	1	1.19559	1.50651	1.77325	0.798127	1.27406	0.984354
AT1G35670.1	55916	| calcium-dependent protein kinase 2 | Chr1:13205456-13208058 FORWARD LENGTH=495 | 201606	7	3	0.0417276	0.198075	0.0318079	1	1.7555	1.03751	1.23632	2.16267	1.02282	0.376439	1	1.64956	1.18402	1.34046	2.01242	1.61767	0.794662	1	1.18158	0.769291	1.37817	0.30959	0.970021	0.724973
AT1G35680.1	24038	| Ribosomal protein L21 | Chr1:13208777-13210246 FORWARD LENGTH=220 | 201606	11	11	5.00006e-05	7.03359e-08	0.000314982	1	1.44084	1.11239	1.3624	1.19449	0.712966	0.975925	1	1.59399	0.906052	0.887909	0.995803	0.464223	0.435667	1	0.944124	0.652321	0.720297	0.523798	0.355686	0.519398
AT1G35720.1	36204	| annexin 1 | Chr1:13225304-13226939 FORWARD LENGTH=317 | 201606	49	48	6.94942e-05	0.0289692	0.0832102	1	0.782311	0.976972	0.798685	0.939579	1.14287	1.42578	1	0.890821	1.33233	1.35797	1.26712	1.21292	1.18904	1	0.792102	0.845933	0.887459	0.934423	1.10228	1.08482
AT1G36160.1	251379	| acetyl-CoA carboxylase 1 | Chr1:13534196-13543773 FORWARD LENGTH=2254 | 201606	22	22	4.16989e-08	0.000192723	0.00713085	1	1.37391	1.40174	0.749943	0.80069	0.303976	0.00875549	1	0.411851	0.71964	0.39156	0.482649	0.325644	0.127084	1	1.58212	0.882355	0.624253	0.873186	0.232462	0.216954
AT1G36280.1	58816	| L-Aspartase-like family protein | Chr1:13640600-13642908 FORWARD LENGTH=527 | 201606	15	5	1.65698e-06	0.00616667	1.99652e-06	1	0.351702	0.563533	0.377402	0.627014	0.280876	0.331386	1	0.813066	0.627256	0.468645	0.486597	0.663832	0.571035	1	0.402887	0.33931	0.38524	0.695655	0.307735	0.423041
AT1G36310.1	44960	| S-adenosyl-L-methionine-dependent methyltransferases superfamily protein | Chr1:13669644-13670934 FORWARD LENGTH=404 | 201606	6	6	0.0215688	0.639133	0.0120439	1	0.534898	0.347617	0.59387	0.593	0.402725	1.08923	1	0.749943	0.769173	0.622078	0.606182	0.669351	0.921919	1	0.84886	0.867188	0.953347	1.13466	1.52477	2.33587
AT1G36390.1	31223	| Co-chaperone GrpE family protein | Chr1:13701811-13703524 REVERSE LENGTH=279 | 201606	9	9	0.687949	0.275062	0.106254	1	0.948656	0.990391	1.14704	0.911707	0.680624	0.712235	1	0.812939	1.04366	0.63721	0.57929	0.665777	0.55395	1	0.795934	0.676789	0.615178	0.53401	0.871064	0.658132
AT1G36730.1	48622	| Translation initiation factor IF2/IF5 | Chr1:13898706-13900025 REVERSE LENGTH=439 | 201606	6	6	0.134692	0.0259536	0.0777071	1	0.722658	0.87421	0.540783	0.496752	0.0262537	1.19234	1	1.07652	1.74095	1.36736	1.31999	0.0355014	1.05239	1	1.29157	1.72959	1.10751	1.49846	0.0434852	0.927466
AT1G37130.1	102844	| nitrate reductase 2 | Chr1:14158617-14161652 FORWARD LENGTH=917 | 201606	27	26	7.61412e-05	2.18444e-08	5.91631e-07	1	1.34546	1.33513	1.29479	1.54576	0.51141	0.316961	1	1.37818	1.87165	1.65997	2.84437	0.553368	0.6941	1	1.51722	0.621724	2.1797	2.07805	2.06215	0.533823
AT1G41830.1	60578	| SKU5-similar 6 | Chr1:15603892-15607802 REVERSE LENGTH=542 | 201606	6	3	0.000129654	0.00711116	0.00748162	1	1.58953	0.747973	0.575239	1.20512	0.805318	0.264411	1	1.28434	0.725799	0.715446	0.699951	0.629591	0.429993	1	0.966956	0.555182	0.677622	0.517249	0.684371	0.529433
AT1G41880.1	12799	| Ribosomal protein L35Ae family protein | Chr1:15651585-15652427 REVERSE LENGTH=111 | 201606	6	4	0.0120748	0.0429439	0.0214474	1	1.06277	0.874024	1.19964	0.993015	1.15722	0.30327	1	0.681016	0.589979	0.518274	0.574722	0.616228	0.370817	1	1.68634	1.19981	1.42159	1.85685	0.973126	0.981726
AT1G42550.1	93875	| plastid movement impaired1 | Chr1:15977131-15979734 FORWARD LENGTH=843 | 201606	34	34	0.00112393	0.00268653	0.00635455	1	1.65	1.64288	1.98908	1.61498	1.58569	1.55794	1	1.31212	1.24814	1.22321	0.724627	1.33824	0.983825	1	1.47263	1.27089	1.18283	0.987288	1.05861	1.15782
AT1G42960.1	17829	| inner membrane localized protein | Chr1:16125863-16127080 FORWARD LENGTH=168 | 201606	7	7	0.130844	0.00832335	0.138802	1	0.821566	0.802968	0.692642	1.16525	0.603896	1.00247	1	1.07445	0.822194	0.70344	0.858338	0.515696	0.717308	1	1.02795	0.809479	0.735848	0.757713	0.7296	0.720062
AT1G42970.1	47660	| glyceraldehyde-3-phosphate dehydrogenase B subunit | Chr1:16127552-16129584 FORWARD LENGTH=447 | 201606	108	88	4.46773e-05	9.53612e-05	0.000385004	1	0.83636	0.84063	1.00869	0.950916	0.932542	1.10494	1	0.970824	0.888993	0.869682	0.729406	0.745348	0.737596	1	0.847444	0.828558	0.765108	0.732976	0.677409	0.72037
AT1G43170.1	44559	| ribosomal protein 1 | Chr1:16266992-16268631 FORWARD LENGTH=389 | 201606	44	40	0.0226716	0.0315936	0.538229	1	0.991128	0.890157	0.727654	0.615722	0.725602	0.40731	1	0.670833	1.10282	0.846353	1.01305	0.982001	0.856319	1	1.21165	1.32554	1.42914	1.36902	1.07957	1.04265
AT1G43190.1	48234	| polypyrimidine tract-binding protein 3 | Chr1:16275432-16278185 REVERSE LENGTH=432 | 201606	13	13	0.00297556	0.0027073	0.115225	1	1.32198	1.2138	1.33123	1.47283	0.856204	0.408421	1	0.751336	1.28039	1.07564	1.22012	0.81314	0.616264	1	1.15679	0.804913	1.20848	1.00812	0.797121	0.519155
AT1G43670.1	37287	| Inositol monophosphatase family protein | Chr1:16468184-16470347 FORWARD LENGTH=341 | 201606	31	31	0.0033246	0.00145968	0.0167106	1	0.806499	0.895732	0.960125	0.98495	0.81585	0.87411	1	0.933332	0.827003	0.80907	0.691431	0.691052	0.675645	1	0.763416	0.838461	0.877851	0.768502	0.763763	0.899086
AT1G43690.1	65464	| ubiquitin interaction motif-containing protein | Chr1:16478519-16482589 FORWARD LENGTH=599 | 201606	10	10	0.00460907	0.184062	0.100218	1	1.38276	2.21694	1.26409	1.68878	1.21838	0.384012	1	0.65732	1.52647	1.19955	1.10934	0.801117	0.785911	1	2.12345	3.02725	3.75616	3.98335	2.42487	1.85986
AT1G43700.1	37791	| VIRE2-interacting protein 1 | Chr1:16484352-16486017 FORWARD LENGTH=341 | 201606	3	3	0.159409	0.159179	0.386988	1	1.1875	1.44408	1.18987	0.411902	1.44125	1.50515	1	0.645854	1.09563	0.82037	1.3208	2.10636	1.81243	1	0.654946	0.927539	1.80577	0.872356	1.40558	1.49589
AT1G43890.1	23531	| RAB GTPASE HOMOLOG B18 | Chr1:16646934-16648395 FORWARD LENGTH=212 | 201606	8	6	0.249192	0.117809	0.19766	1	1.46207	2.08799	1.12616	0.989617	2.07225	0.569623	1	0.726403	1.70975	0.847717	1.8173	1.55201	0.98272	1	0.968376	1.57354	1.17474	1.05491	1.01623	0.541019
AT1G44170.1	53159	| aldehyde dehydrogenase 3H1 | Chr1:16796564-16800031 REVERSE LENGTH=484 | 201606	5	5	0.0137597	0.684566	0.000242911	1	0.336281	0.328348	0.0337741	0.630199	0.561863	0.0342111	1	0.559473	0.602213	0.493661	0.698294	0.936354	1.02195	1	1.36772	1.34297	1.78914	2.5463	6.13372	0.13151
AT1G44446.1	60331	| Pheophorbide a oxygenase family protein with Rieske 2Fe-2S domain-containing protein | Chr1:16848664-16851152 REVERSE LENGTH=536 | 201606	5	5	0.000514564	0.00220134	1.75027e-06	1	0.541873	0.266887	0.756726	0.156351	0.0198549	0.762272	1	0.649188	0.425408	0.263587	0.0250171	0.0244522	0.0240287	1	0.349689	0.17642	0.100216	0.329574	0.0236769	0.0252726
AT1G44575.1	28008	| Chlorophyll A-B binding family protein | Chr1:16871768-16873194 FORWARD LENGTH=265 | 201606	22	22	0.000566947	0.175494	0.0264364	1	0.885717	0.756968	0.907591	1.06884	0.998005	0.579806	1	0.729018	0.825142	0.869509	0.977963	0.993476	0.798445	1	0.990162	1.45347	1.30201	1.03514	1.128	1.01781
AT1G44790.1	22229	| ChaC-like family protein | Chr1:16912403-16913582 REVERSE LENGTH=199 | 201606	4	4	0.000352841	0.000266771	0.000406764	1	0.759484	0.990012	0.0190696	0.709779	0.552773	0.643768	1	0.63042	0.841437	0.0192611	0.808403	0.616249	0.5468	1	1.05518	0.777263	0.0258901	0.903361	0.631049	0.423835
AT1G44820.1	48959	| Peptidase M20/M25/M40 family protein | Chr1:16926351-16928354 FORWARD LENGTH=438 | 201606	11	11	1.71029e-05	0.0431382	0.00206084	1	1.61435	1.26488	1.3047	2.70928	2.34884	2.87937	1	1.03888	0.908129	0.998852	0.879809	1.17477	1.91439	1	0.749431	0.526748	0.642886	0.436896	0.953281	1.02108
AT1G44835.1	33711	| YbaK/aminoacyl-tRNA synthetase-associated domain-containing protein | Chr1:16939909-16942337 FORWARD LENGTH=307 | 201606	4	4	0.0783498	0.489759	0.591802	1	0.557608	0.86093	0.668989	0.265333	0.223065	0.789934	1	2.41004	2.81335	2.23592	1.60691	1.59788	2.09385	1	0.842472	0.470814	0.825805	0.452133	0.65335	0.47424
AT1G44920.1	27715	| transmembrane protein | Chr1:16983229-16984408 REVERSE LENGTH=258 | 201606	3	3	0.0944483	0.000107708	0.0487703	1	1.41079	0.713506	0.0532025	0.591842	1.36984	0.897295	1	0.532003	0.251016	0.0358549	0.151633	1.49437	0.906469	1	0.863224	0.299629	0.0283159	0.717311	0.871137	0.645364
AT1G45000.1	44756	| AAA-type ATPase family protein | Chr1:17009220-17011607 FORWARD LENGTH=399 | 201606	26	6	0.0250117	0.0109409	0.122745	1	0.811108	0.570017	0.806942	0.896653	0.706902	0.903705	1	0.920392	0.845841	0.792085	1.03576	0.816894	1.13822	1	1.2001	1.08066	0.989771	0.993973	1.16616	1.15427
AT1G45145.1	13122	| thioredoxin H-type 5 | Chr1:17075264-17076256 REVERSE LENGTH=118 | 201606	7	7	0.00014659	0.00109814	4.20141e-05	1	0.887847	6.3717	14.9468	7.07332	22.871	42.1561	1	0.921884	25.5687	25.0404	43.1969	16.1397	36.8149	1	0.965456	9.47985	29.0066	42.2151	104.353	65.0332
AT1G45170.1	23591	| outer envelope pore 24B-like protein | Chr1:17096233-17097910 REVERSE LENGTH=213 | 201606	3	3	0.00689388	0.000555801	0.232183	1	0.618763	2.31098	1.78341	1.3164	0.60706	0.936389	1	0.51836	2.41285	1.2032	3.12258	0.115865	0.806194	1	1.42902	1.38009	1.7984	0.514421	0.124942	1.78177
AT1G45170.2	18411	| outer envelope pore 24B-like protein | Chr1:17096233-17097910 REVERSE LENGTH=167 | 201606	2	2	3.43314e-05	0.000315751	0.00527673	1	0.887847	23.1098	17.8341	0.99196	6.0706	9.36389	1	0.921884	16.8052	8.38015	0.825627	0.806983	5.61504	1	0.965456	9.6066	12.5184	0.903506	0.869703	12.4027
AT1G45201.1	54776	| triacylglycerol lipase-like 1 | Chr1:17123889-17128462 FORWARD LENGTH=479 | 201606	19	19	6.04695e-06	0.000724663	0.00229679	1	0.870609	0.50681	0.520544	0.70232	1.165	0.225758	1	0.789293	0.877938	0.867843	1.09863	2.66109	1.88595	1	0.401056	0.551743	0.712227	0.902561	0.995504	1.36358
AT1G45201.2	44119	| triacylglycerol lipase-like 1 | Chr1:17123889-17127497 FORWARD LENGTH=387 | 201606	18	18	4.35097e-07	7.43738e-05	8.27853e-05	1	139.052	80.9469	83.1405	112.173	186.072	36.0577	1	80.7783	89.8504	88.8173	112.436	272.343	193.012	1	70.8882	97.5225	125.889	159.531	175.959	241.017
AT1G45332.1	83179	| Translation elongation factor EFG/EF2 protein | Chr1:17172507-17176683 REVERSE LENGTH=754 | 201606	11	6	0.00386938	2.52966e-06	0.0028019	1	2.13694	2.1908	1.69749	0.376076	1.51703	1.484	1	3.10196	11.1504	7.73011	10.4616	4.7107	5.02347	1	0.595814	0.46982	0.620944	1.0414	0.298884	0.35686
AT1G45474.1	27802	| photosystem I light harvesting complex protein 5 | Chr1:17179353-17180439 FORWARD LENGTH=256 | 201606	3	3	0.026538	0.626452	0.168697	1	2.30311	0.691782	1.23068	1.55449	0.859905	0.378166	1	0.788887	0.618224	0.83801	0.815968	1.16166	1.25722	1	2.09687	1.24107	0.791655	1.65452	1.00542	1.39167
AT1G45688.1	37201	| transmembrane protein | Chr1:17191502-17192870 FORWARD LENGTH=342 | 201606	1	1	0.000269545	0.0788608	3.2619e-05	1	8.87847	3.42843	0.891703	0.99196	0.862579	0.903238	1	0.531458	0.123648	0.122468	0.120658	0.117933	0.115891	1	0.0360869	0.0361454	0.0354411	0.0337713	0.0325078	0.0346987
AT1G45688.2	27079	| transmembrane protein | Chr1:17191502-17192464 FORWARD LENGTH=248 | 201606	1	1	9.47842e-23	0.0788608	3.2619e-05	1	8.87847	0.866903	0.891703	0.99196	0.862579	0.903238	1	0.531458	0.123648	0.122468	0.120658	0.117933	0.115891	1	0.0360869	0.0361454	0.0354411	0.0337713	0.0325078	0.0346987
AT1G47128.1	50966	| Granulin repeat cysteine protease family protein | Chr1:17283139-17285609 REVERSE LENGTH=462 | 201606	24	24	7.34179e-07	1.79826e-10	3.37143e-09	1	1.6695	2.17266	1.7645	2.14202	2.88011	2.71393	1	1.54769	2.26448	2.34319	2.74242	3.30468	3.95987	1	1.56246	1.8046	1.98305	1.87429	3.51653	2.29102
AT1G47200.1	19134	| WPP domain protein 2 | Chr1:17298181-17298723 REVERSE LENGTH=180 | 201606	8	5	0.000268013	0.0402569	0.0101074	1	1.54973	1.4146	2.01528	1.11954	2.37835	3.17187	1	1.16218	1.70584	1.96718	1.07949	1.83238	1.66731	1	1.49302	1.80264	1.55142	2.05627	1.42521	2.19609
AT1G47250.1	30410	| 20S proteasome alpha subunit F2 | Chr1:17319220-17320900 FORWARD LENGTH=277 | 201606	18	2	5.54874e-07	5.63088e-06	8.13488e-07	1	166.119	179.027	240.41	211.469	213.278	228.818	1	206.346	231.992	229.591	266.211	209.634	242.847	1	234.745	233.01	259.267	262.151	255.371	281.741
AT1G47260.1	30065	| gamma carbonic anhydrase 2 | Chr1:17321384-17323347 REVERSE LENGTH=278 | 201606	21	18	5.10419e-05	0.0508271	0.0125543	1	0.87139	1.24296	1.19285	1.0666	1.20249	1.70581	1	1.33191	1.22282	1.40052	1.02907	1.29968	1.38748	1	1.34685	0.977919	1.18181	1.08435	1.17202	1.46274
AT1G47420.1	28106	| succinate dehydrogenase 5 | Chr1:17395774-17397176 REVERSE LENGTH=257 | 201606	13	13	0.536843	0.0555898	0.728284	1	0.906203	0.885274	0.847194	1.1394	0.947733	1.01137	1	0.776132	0.790639	1.07798	1.01794	0.864283	1.12849	1	0.989937	1.0225	1.06022	0.967928	1.13245	1.14636
AT1G47490.1	48498	| RNA-binding protein 47C | Chr1:17424801-17427182 FORWARD LENGTH=432 | 201606	4	1	3.06169e-05	6.3294e-07	0.00022603	1	0.887039	0.0261411	1.16262	0.0299121	0.0260107	0.0272368	1	0.831643	0.0254423	0.333611	0.0248269	0.0242663	0.0238461	1	0.453074	0.0194508	0.257047	0.0181732	0.0174933	0.0186723
AT1G47500.1	48632	| RNA-binding protein 47C' | Chr1:17432682-17434805 FORWARD LENGTH=434 | 201606	4	1	2.89594e-05	9.92883e-06	0.000158426	1	0.887039	1.30859	1.16262	0.0299121	0.0260107	0.0272368	1	1.14499	1.57504	0.414534	0.0308492	0.0301525	0.0296303	1	0.48495	0.471963	0.275131	0.0194518	0.0187241	0.019986
AT1G47550.1	100065	| exocyst complex component sec3A | Chr1:17457171-17463896 FORWARD LENGTH=887 | 201606	13	13	0.00379925	0.0291612	0.0382132	1	3.55761	3.03416	3.43521	3.15893	2.57937	0.601292	1	1.89557	4.32016	2.41096	3.13086	3.42699	2.71128	1	3.05809	3.24882	3.37602	3.24234	3.12195	2.40011
AT1G47710.1	42639	| Serine protease inhibitor (SERPIN) family protein | Chr1:17558271-17560061 FORWARD LENGTH=391 | 201606	9	9	0.0244403	0.399127	0.750871	1	1.57906	0.480128	1.78105	1.31303	1.72435	1.39988	1	1.35805	0.739552	1.28001	1.46664	1.19104	1.32322	1	1.009	0.691464	0.815185	0.992239	1.08293	0.92885
AT1G47900.1	118540	| filament-like protein (DUF869) | Chr1:17647340-17651035 REVERSE LENGTH=1054 | 201606	2	2	4.16209e-05	0.0672404	3.7375e-23	1	0.126973	2.06521	2.55049	0.141863	0.12336	1.72268	1	0.134725	0.482847	0.122468	0.120658	0.117933	0.115891	1	0.0965456	0.0967021	0.0948178	0.0903506	0.0869703	0.0928317
AT1G47900.2	118247	| filament-like protein (DUF869) | Chr1:17647340-17651035 REVERSE LENGTH=1052 | 201606	2	2	0.000285162	0.0672404	0.000109287	1	0.51266	2.06521	2.55049	0.141863	0.12336	1.72268	1	0.134725	0.482847	0.122468	0.120658	0.117933	0.115891	1	0.0965456	0.0967021	0.0948178	0.358081	0.0869703	0.0928317
AT1G47900.3	118540	| filament-like protein (DUF869) | Chr1:17647340-17651035 REVERSE LENGTH=1054 | 201606	2	2	0.000285162	0.0672404	3.7375e-23	1	0.51266	2.06521	2.55049	0.141863	0.12336	1.72268	1	0.134725	0.482847	0.122468	0.120658	0.117933	0.115891	1	0.0965456	0.0967021	0.0948178	0.0903506	0.0869703	0.0928317
AT1G48030.1	53988	| mitochondrial lipoamide dehydrogenase 1 | Chr1:17717432-17719141 REVERSE LENGTH=507 | 201606	68	48	0.0208744	0.08956	0.0613229	1	0.905442	0.953298	1.03673	0.988927	0.985149	1.13569	1	0.914587	0.874605	0.965667	0.784025	0.98761	0.997378	1	1.01131	1.02399	0.924005	0.841226	0.894119	0.935615
AT1G48090.1	462015	| calcium-dependent lipid-binding family protein | Chr1:17732582-17758194 REVERSE LENGTH=4146 | 201606	11	11	0.000352929	0.000872245	0.301193	1	1.79398	2.36746	1.34276	0.397166	1.65679	0.109436	1	1.06811	2.41282	2.28314	2.33948	4.05241	2.37432	1	1.45869	2.36943	1.49574	1.36215	1.95021	1.16709
AT1G48160.1	16274	| signal recognition particle 19 kDa protein%2C putative / SRP19 | Chr1:17786779-17788286 REVERSE LENGTH=145 | 201606	3	3	0.00886296	0.0225104	0.914348	1	2.15284	2.44733	0.492659	0.140018	0.839369	2.97244	1	9.49125	25.3827	8.5278	16.0074	8.29793	18.4324	1	0.708593	0.915921	0.700957	1.3192	1.29128	0.910289
AT1G48210.1	39589	| Protein kinase superfamily protein | Chr1:17799551-17801798 FORWARD LENGTH=363 | 201606	10	5	0.00857912	0.0258142	0.0283655	1	1.55733	0.758273	1.34435	2.12733	2.25377	1.81117	1	0.689303	0.84868	1.68778	2.47117	1.31927	1.90893	1	0.824891	0.34951	1.27856	1.28469	1.61846	1.5253
AT1G48240.1	29887	| Putative plant snare 12 | Chr1:17809223-17811656 REVERSE LENGTH=265 | 201606	6	4	0.024347	0.00295219	0.000846932	1	8.328	10.2896	6.79101	5.88427	7.37675	3.0764	1	30.4447	22.5351	22.5638	5.86469	29.5456	15.9918	1	1.77948	2.07442	1.57517	1.05874	0.879468	0.04667
AT1G48240.2	23989	| Putative plant snare 12 | Chr1:17809223-17811302 REVERSE LENGTH=214 | 201606	5	3	2.01156e-05	1.68922e-05	0.000181896	1	0.226751	0.221402	0.227736	5.88427	7.37675	3.0764	1	0.921884	0.846091	0.838015	5.86469	29.5456	15.9918	1	0.0485372	0.0486158	0.0476685	1.05874	0.879468	0.04667
AT1G48320.1	16713	| Thioesterase superfamily protein | Chr1:17855024-17855577 REVERSE LENGTH=156 | 201606	3	3	0.0297969	4.44048e-05	1.47683e-06	1	0.887847	0.866903	0.891703	13.7578	11.8573	0.903238	1	3.63662	0.846091	19.7121	30.0731	3.22662	0.793008	1	7.02695	0.967021	34.8905	33.1509	34.8323	0.928317
AT1G48350.1	18726	| Ribosomal L18p/L5e family protein | Chr1:17867269-17868215 FORWARD LENGTH=170 | 201606	12	12	0.0168982	0.000537637	0.000858625	1	0.874712	0.946072	1.07553	0.836907	0.699724	1.18406	1	0.967154	1.05303	0.709859	0.550868	0.528677	0.546169	1	0.88428	0.589186	0.742675	0.872296	0.435725	0.820101
AT1G48410.1	116191	| Stabilizer of iron transporter SufD / Polynucleotidyl transferase | Chr1:17886285-17891892 REVERSE LENGTH=1048 | 201606	16	16	0.00085936	0.669051	0.140641	1	1.78729	2.88874	1.88557	1.7892	1.39546	0.455363	1	1.02018	1.51848	1.50876	1.13051	1.51478	1.30798	1	1.71899	1.10404	1.53143	1.18765	1.49161	0.646191
AT1G48420.1	43900	| D-cysteine desulfhydrase | Chr1:17896767-17898803 REVERSE LENGTH=401 | 201606	29	29	0.0153654	0.000539277	0.000633392	1	1.03837	1.28199	0.982436	0.961366	1.41624	1.31881	1	1.26723	1.19198	1.22708	1.02668	1.36979	1.72943	1	1.08466	1.19116	1.21631	1.2513	1.33103	1.71207
AT1G48470.1	38907	| glutamine synthetase 1%3B5 | Chr1:17913784-17915926 FORWARD LENGTH=353 | 201606	4	1	1.28557e-06	3.05468e-09	4.78811e-10	1	0.887847	0.866903	14.786	0.99196	0.862579	0.903238	1	0.921884	0.846091	22.3262	0.825627	0.806983	0.793008	1	0.965456	0.967021	25.1477	0.903506	0.869703	0.928317
AT1G48480.1	71131	| receptor-like kinase 1 | Chr1:17918475-17920743 FORWARD LENGTH=655 | 201606	12	11	1.16353e-06	0.00052696	0.00102959	1	2.27855	2.05993	1.67968	1.42098	0.322	1.18722	1	1.53315	2.16686	1.24757	1.38542	0.955799	0.23632	1	0.590573	0.621036	0.601647	0.651355	0.120967	0.334867
AT1G48520.1	60941	| GLU-ADT subunit B | Chr1:17940185-17942540 FORWARD LENGTH=550 | 201606	22	22	0.139921	7.82124e-05	0.00184419	1	0.75766	0.840288	0.887681	0.761806	0.650123	0.849805	1	0.740346	0.5658	0.776543	0.459004	0.531028	0.476626	1	0.787277	0.801197	0.883974	0.826225	0.478427	0.819429
AT1G48600.1	54018	| S-adenosyl-L-methionine-dependent methyltransferases superfamily protein | Chr1:17966448-17969077 FORWARD LENGTH=475 | 201606	34	19	0.0173166	0.209662	0.000108489	1	0.862088	0.903759	0.97316	0.99434	0.735401	0.757904	1	1.04165	1.04153	1.07623	0.850704	0.842028	0.871016	1	0.943542	0.752291	0.814718	0.844366	0.581795	0.696017
AT1G48610.1	21674	| AT hook motif-containing protein | Chr1:17971027-17972798 REVERSE LENGTH=212 | 201606	15	15	0.141345	0.0173883	0.105951	1	1.28149	1.42392	1.03945	1.03067	1.37933	0.940439	1	1.36996	1.68233	1.31044	1.04718	2.26344	2.08739	1	1.59968	1.19896	1.22781	0.904159	1.27939	1.75549
AT1G48610.2	20208	| AT hook motif-containing protein | Chr1:17971322-17972798 REVERSE LENGTH=198 | 201606	13	13	4.89269e-07	1.72182e-10	9.25382e-06	1	0.887847	0.866903	86.5765	0.99196	0.862579	0.903238	1	0.921884	0.846091	81.1873	0.825627	0.806983	0.793008	1	0.965456	0.967021	106.142	0.903506	0.869703	0.928317
AT1G48620.1	51391	| high mobility group A5 | Chr1:17974148-17976301 REVERSE LENGTH=479 | 201606	11	11	0.00538496	0.00711574	0.00111275	1	1.27867	0.963609	1.58329	2.22135	2.58555	1.40336	1	1.05901	0.984426	1.2694	0.591802	1.86986	1.59922	1	1.69537	2.58141	3.05375	1.24112	3.04038	3.59831
AT1G48630.1	35801	| receptor for activated C kinase 1B | Chr1:17981977-17983268 REVERSE LENGTH=326 | 201606	18	5	0.00294246	1.97482e-08	2.11674e-05	1	0.901723	0.766806	0.721151	0.951421	0.310253	0.408253	1	0.937552	0.884568	0.542432	0.671933	0.186602	0.157576	1	0.997788	0.534227	0.607544	0.720172	0.368267	0.472568
AT1G48830.1	21922	| Ribosomal protein S7e family protein | Chr1:18059854-18060935 REVERSE LENGTH=191 | 201606	15	14	0.000353771	0.00257742	0.00138826	1	0.888182	0.865665	0.975004	0.95413	0.66592	0.493583	1	0.862214	0.708314	0.729222	0.626096	0.553198	0.476516	1	0.825891	0.654489	0.684084	0.74251	0.617439	0.524399
AT1G48850.1	47318	| chorismate synthase%2C putative / 5-enolpyruvylshikimate-3-phosphate phospholyase | Chr1:18065154-18067956 REVERSE LENGTH=436 | 201606	15	15	0.00960304	0.567088	0.794927	1	0.739082	0.737338	0.846994	0.936551	0.662095	0.964045	1	0.891951	0.809774	0.895217	0.746974	0.962234	0.92912	1	1.0622	0.957678	0.883917	0.99592	1.08969	1.00663
AT1G48860.1	55831	| RNA 3'-terminal phosphate cyclase/enolpyruvate transferase%2C alpha/beta | Chr1:18068892-18071331 REVERSE LENGTH=521 | 201606	27	8	0.0308823	0.136082	0.0537512	1	1.11798	1.38158	1.16797	1.07624	0.894646	1.4251	1	1.05604	0.991881	0.979521	0.866365	0.679416	0.856313	1	0.893621	0.682986	0.807862	0.959445	0.672041	0.858504
AT1G48900.1	54782	| Signal recognition particle%2C SRP54 subunit protein | Chr1:18084972-18087743 REVERSE LENGTH=495 | 201606	13	11	0.157548	0.743153	0.3155	1	1.11539	1.67058	1.48671	0.654873	1.29462	1.21373	1	1.1199	1.11749	0.976048	1.16114	1.10972	1.13057	1	1.14509	0.857487	0.732667	1.15479	0.953657	1.22809
AT1G48920.1	58773	| nucleolin like 1 | Chr1:18098186-18101422 FORWARD LENGTH=557 | 201606	4	4	0.127706	6.71159e-05	3.83588e-05	1	0.887847	0.866903	0.891703	0.99196	0.862579	27.2834	1	6.53042	8.88531	27.9922	5.53788	11.064	52.97	1	0.965456	3.66662	3.91605	0.903506	28.7838	34.0302
AT1G49040.1	131593	| stomatal cytokinesis defective / SCD1 protein (SCD1) | Chr1:18139419-18148826 REVERSE LENGTH=1187 | 201606	7	7	0.0231348	0.0600512	0.413717	1	2.0972	1.51967	1.66983	1.21795	1.83944	0.3385	1	1.86519	5.16455	2.95066	3.86572	3.48222	4.21246	1	1.38032	1.97421	1.4763	2.58883	1.85338	1.32402
AT1G49140.1	12530	| NADH dehydrogenase ubiquinone 1 beta subcomplex subunit 10-B-like protein (Complex I subunit NDUFS6) | Chr1:18177696-18178269 REVERSE LENGTH=107 | 201606	3	1	0.000204866	0.00887848	0.0271501	1	6.8275	6.63482	0.227736	0.253341	4.36324	5.38322	1	1.22352	1.13432	0.0838015	0.0825627	1.61849	1.59101	1	0.692009	0.550474	0.0407883	0.0388666	0.618152	0.532278
AT1G49240.1	41863	| actin 8 | Chr1:18216539-18217947 FORWARD LENGTH=377 | 201606	75	1	2.51295e-05	0.000861539	0.146138	1	1.38616	1.46098	1.22042	1.18675	1.49731	1.15024	1	1.17667	1.43735	1.3496	1.39262	1.41902	1.38472	1	1.12011	1.17283	1.14434	1.21203	1.18424	1.08007
AT1G49300.1	22980	| RAB GTPase homolog G3E | Chr1:18234842-18236968 FORWARD LENGTH=206 | 201606	13	5	0.000247865	0.00572099	0.0943789	1	1.61254	1.1141	1.50844	1.83166	1.7025	0.400447	1	0.832893	0.46994	0.990264	1.41351	1.2077	1.01198	1	1.16625	0.953097	1.31136	0.898776	1.00145	0.779128
AT1G49340.1	224015	| Phosphatidylinositol 3- and 4-kinase family protein | Chr1:18252355-18263967 FORWARD LENGTH=2028 | 201606	2	2	3.49216e-08	0.332994	0.422461	1	17.7569	8.66903	3.49024	0.99196	0.862579	0.903238	1	0.921884	0.846091	3.28079	5.73466	8.38395	0.793008	1	0.244971	1.64428	0.934036	1.59124	1.52621	0.235547
AT1G49380.1	59393	| cytochrome c biogenesis protein family | Chr1:18276794-18279204 FORWARD LENGTH=547 | 201606	2	2	0.012922	5.87451e-17	0.0488285	1	0.716171	0.0522821	0.219221	0.431588	0.0520214	0.0544735	1	0.0307295	0.028203	0.0279338	0.0275209	0.0268994	0.0264336	1	0.093217	0.0933681	0.0915488	0.0872356	0.0839719	0.0896311
AT1G49430.1	74389	| long-chain acyl-CoA synthetase 2 | Chr1:18291188-18295641 FORWARD LENGTH=665 | 201606	5	4	0.00184389	0.00285976	0.000584483	1	1.16921	0.49987	0.59181	0.173106	0.0213322	0.0223377	1	0.797297	0.290184	0.21504	0.0824361	0.0207077	0.0203491	1	1.92769	0.483511	0.184057	0.463033	0.0434852	0.0464159
AT1G49480.1	25850	| related to vernalization1 1 | Chr1:18314596-18315460 REVERSE LENGTH=226 | 201606	3	3	0.00406435	0.000834342	0.80809	1	17.6525	8.66903	29.5439	6.79254	8.93616	9.03238	1	3.61031	14.0742	11.2319	10.84	16.1397	18.5641	1	1.92511	1.87956	1.87026	1.49846	1.4414	1.54298
AT1G49600.1	48483	| RNA-binding protein 47A | Chr1:18357236-18360150 REVERSE LENGTH=445 | 201606	6	4	0.159707	0.00555883	0.0144375	1	0.716158	1.14116	1.35394	1.29973	0.18859	1.09866	1	0.867578	1.38717	0.321168	0.909162	0.308748	0.397913	1	0.698741	0.834941	0.266998	0.600736	0.291559	0.361228
AT1G49600.2	49874	| RNA-binding protein 47A | Chr1:18357827-18360150 REVERSE LENGTH=450 | 201606	4	2	9.80515e-07	1.25279e-06	6.9247e-05	1	23.5479	0.866903	44.5188	0.99196	0.862579	0.903238	1	45.866	0.846091	16.9791	0.825627	0.806983	0.793008	1	41.9245	0.967021	16.0199	0.903506	0.869703	0.928317
AT1G49630.1	121131	| presequence protease 2 | Chr1:18368405-18375336 REVERSE LENGTH=1080 | 201606	24	2	0.00739481	0.0808971	0.327465	1	0.699582	0.854687	1.0915	1.143	0.869797	0.910908	1	0.898977	0.808221	0.975375	0.818566	0.719661	0.847945	1	0.965897	0.840117	0.950807	0.875162	0.711685	0.901202
AT1G49650.1	41693	| alpha/beta-Hydrolases superfamily protein | Chr1:18377363-18378487 REVERSE LENGTH=374 | 201606	6	5	0.0851582	1.60942e-05	0.00235677	1	0.614189	0.629958	0.581589	0.641657	0.460046	0.692191	1	0.498862	0.655601	0.244162	0.129533	0.261282	0.280594	1	0.817216	0.327235	0.617113	0.553776	0.298979	0.715403
AT1G49660.1	35197	| carboxyesterase 5 | Chr1:18378777-18379736 REVERSE LENGTH=319 | 201606	7	6	0.0160855	0.018548	0.356094	1	0.884052	0.716839	0.887723	0.64736	0.295109	0.299305	1	0.711786	0.518774	0.516199	0.771501	0.496192	0.423828	1	0.966516	0.962195	0.772786	0.811866	0.440566	0.558086
AT1G49670.1	67944	| ARP protein (REF) | Chr1:18381591-18386021 REVERSE LENGTH=629 | 201606	11	11	0.000153331	0.374693	0.0152348	1	1.08118	1.05693	0.584294	0.686442	0.633724	0.121621	1	0.831505	0.956653	1.03241	1.24637	1.26357	1.01492	1	0.96512	1.22379	1.1475	1.14003	1.28446	0.282174
AT1G49750.1	54408	| Leucine-rich repeat (LRR) family protein | Chr1:18411177-18412779 REVERSE LENGTH=494 | 201606	15	15	0.0220649	0.425454	0.000743617	1	1.54791	1.25188	1.81172	1.50434	1.88773	1.97843	1	0.82704	0.776478	1.02383	0.694168	0.833637	1.08701	1	1.40125	1.13818	1.46608	1.01987	1.59792	1.73754
AT1G49760.1	72779	| poly(A) binding protein 8 | Chr1:18416740-18419753 FORWARD LENGTH=671 | 201606	25	23	0.0321134	0.000910588	0.00407235	1	1.0068	0.740644	0.905875	0.842954	0.556299	0.835993	1	0.876581	0.719661	0.702185	0.789517	0.549849	0.620162	1	0.916457	0.536844	0.731805	0.707385	0.624985	0.610581
AT1G49820.1	48071	| S-methyl-5-thioribose kinase | Chr1:18443005-18444907 FORWARD LENGTH=420 | 201606	9	9	3.11094e-05	0.0191831	0.0497661	1	4.53674	8.84885	5.31623	5.88427	10.2973	0.918746	1	0.541081	1.74095	1.46861	2.95458	1.42025	1.15617	1	1.37072	2.29415	2.28158	2.17497	3.81232	2.60253
AT1G49970.1	42628	| CLP protease proteolytic subunit 1 | Chr1:18501936-18504462 REVERSE LENGTH=387 | 201606	16	16	0.0655544	0.00968351	0.0642241	1	1.01302	1.14723	1.11068	0.97191	0.903581	1.25224	1	0.921166	0.824064	1.20371	0.874602	1.09467	1.11169	1	0.94066	0.821802	0.780674	0.914166	0.902739	0.892963
AT1G49975.1	14730	| photosystem I reaction center subunit N | Chr1:18504845-18505431 FORWARD LENGTH=129 | 201606	3	3	0.0140068	0.475101	0.0303248	1	0.887847	3.42843	8.91703	13.2376	22.9004	12.3073	1	9.34142	11.3432	11.4421	8.25627	8.06983	10.584	1	0.710729	0.513148	1.63878	1.33025	1.28048	1.59302
AT1G50030.1	279188	| target of rapamycin | Chr1:18522626-18539619 REVERSE LENGTH=2481 | 201606	9	9	0.0121836	0.693705	0.161749	1	4.27611	2.97145	2.15681	1.37564	3.15986	0.0544735	1	0.741815	1.71071	1.36675	1.80114	1.64022	1.78374	1	0.679309	1.33102	1.04435	1.08991	1.03613	0.296781
AT1G50170.1	24925	| sirohydrochlorin ferrochelatase B | Chr1:18582087-18583514 FORWARD LENGTH=225 | 201606	3	3	0.287067	0.0688371	0.255993	1	0.370882	0.205497	0.70754	0.594573	0.363867	0.557602	1	0.63967	0.0425936	1.26561	0.679215	0.551007	0.921291	1	4.07522	4.90735	2.40587	2.29252	2.28993	5.52158
AT1G50200.1	110489	| Alanyl-tRNA synthetase | Chr1:18591429-18598311 REVERSE LENGTH=1003 | 201606	46	46	0.0205738	0.812129	0.296939	1	1.24952	1.2754	1.34189	1.22397	1.20312	0.870206	1	1.06579	1.08445	1.08266	0.991929	1.04341	0.971737	1	0.982877	0.874249	0.975833	0.910165	0.90131	0.790605
AT1G50250.1	76759	| FTSH protease 1 | Chr1:18614398-18616930 REVERSE LENGTH=716 | 201606	60	22	0.0114582	0.000334667	0.00227003	1	1.03853	0.951078	1.07202	0.983043	1.04889	0.889312	1	1.15623	0.8694	0.972912	0.8258	0.970417	0.931633	1	0.922031	0.867855	0.913416	0.842438	0.832222	0.772056
AT1G50320.1	19648	| thioredoxin X | Chr1:18638606-18639464 REVERSE LENGTH=182 | 201606	11	11	0.327407	0.00281631	0.00221938	1	1.15854	1.27901	0.926513	0.774693	0.673337	1.17791	1	1.49609	1.59688	1.37084	0.459236	0.910673	1.34549	1	0.519567	0.485668	0.41126	0.632856	0.422784	0.525115
AT1G50370.1	34819	| Calcineurin-like metallo-phosphoesterase superfamily protein | Chr1:18658894-18661672 FORWARD LENGTH=303 | 201606	11	1	0.0163754	0.116076	0.232424	1	1.18236	0.863323	0.972701	1.12646	0.535834	0.600017	1	0.778768	0.947582	0.741706	0.778054	0.614322	0.699769	1	0.827616	0.803744	0.808129	0.674695	0.840458	0.59713
AT1G50380.2	88201	| Prolyl oligopeptidase family protein | Chr1:18662282-18666185 FORWARD LENGTH=776 | 201606	24	24	0.000192484	0.00499424	0.000367797	1	1.20854	1.5492	1.71163	1.12217	2.20355	1.40799	1	1.26299	1.34502	1.88142	1.77623	2.06787	2.09606	1	1.56726	1.42974	2.18402	1.72105	2.44944	2.23276
AT1G50430.1	49591	| Ergosterol biosynthesis ERG4/ERG24 family | Chr1:18682175-18685555 REVERSE LENGTH=432 | 201606	2	2	0.0117253	0.207879	0.583559	1	0.738021	0.578314	0.445851	0.658198	0.431289	0.316913	1	0.566424	0.67863	1.02461	1.16206	0.655084	0.480846	1	0.375622	0.580939	0.476569	0.562934	0.757607	0.580828
AT1G50450.1	46560	| Saccharopine dehydrogenase | Chr1:18687902-18690348 REVERSE LENGTH=428 | 201606	13	13	0.171089	0.00917576	0.279716	1	0.752855	0.83469	1.02799	0.841203	0.730096	0.836456	1	0.660915	0.670146	0.690728	0.501636	0.666665	0.653558	1	0.961504	0.754973	0.777541	0.811267	0.537571	0.830323
AT1G50480.1	67802	| 10-formyltetrahydrofolate synthetase | Chr1:18702064-18704687 FORWARD LENGTH=634 | 201606	60	60	0.142518	0.00062296	0.0215913	1	1.06654	1.01624	1.03817	0.984206	1.02631	1.2076	1	1.04367	1.08683	1.05569	1.03589	1.34823	1.61469	1	0.945101	0.857017	0.888789	0.852699	0.928541	1.12743
AT1G50500.1	92530	| Membrane trafficking VPS53 family protein | Chr1:18708217-18715597 REVERSE LENGTH=828 | 201606	10	10	0.000511982	0.219296	0.221532	1	1.21371	1.73806	1.5389	0.538055	1.17145	0.329286	1	0.929937	1.61731	1.26314	1.72077	1.95081	1.82848	1	1.20667	1.20214	1.42956	1.43113	1.87505	1.08111
AT1G50510.1	34800	| indigoidine synthase A family protein | Chr1:18716578-18719060 FORWARD LENGTH=330 | 201606	3	3	0.157706	0.375604	0.268068	1	0.757957	0.626591	0.510731	0.426563	0.144758	0.0385548	1	1.41164	0.666149	1.91891	1.03136	0.667711	0.809059	1	0.965456	1.26698	1.89636	0.941549	0.869703	1.54639
AT1G50570.1	42153	| Calcium-dependent lipid-binding (CaLB domain) family protein | Chr1:18726400-18727566 REVERSE LENGTH=388 | 201606	6	5	0.399703	0.0672757	0.22394	1	1.77179	2.16858	2.65926	2.00509	2.8033	3.15525	1	2.60568	3.22227	3.64946	3.08885	3.07431	3.82752	1	1.79775	1.31484	1.8712	1.3445	1.51193	1.615
AT1G50600.1	66641	| scarecrow-like 5 | Chr1:18737398-18739547 REVERSE LENGTH=597 | 201606	3	3	0.072649	0.0234192	0.0695395	1	0.872553	2.04558	2.52671	0.95879	3.213	1.27495	1	0.132362	3.23056	2.41539	1.18542	3.07106	3.42747	1	0.239025	3.27163	2.34747	2.99716	3.59321	3.84294
AT1G50670.1	23425	| OTU-like cysteine protease family protein | Chr1:18775086-18776552 REVERSE LENGTH=208 | 201606	9	9	0.0272285	0.123899	0.531554	1	1.4186	1.03824	0.947559	0.72868	0.745669	0.963354	1	1.29462	1.0669	1.22801	1.18409	0.754031	0.683852	1	1.19263	0.974253	0.93691	0.902811	0.768463	0.874492
AT1G50700.1	58606	| calcium-dependent protein kinase 33 | Chr1:18782214-18784385 FORWARD LENGTH=521 | 201606	6	1	0.000155099	1.71996e-05	0.00197187	1	0.887847	0.866903	0.891703	0.99196	20.258	0.903238	1	0.921884	0.846091	0.838015	0.825627	29.6361	0.793008	1	0.965456	0.967021	0.948178	0.903506	20.1751	0.928317
AT1G50940.1	38408	| electron transfer flavoprotein alpha | Chr1:18878038-18879939 REVERSE LENGTH=363 | 201606	10	10	0.000636954	0.00135281	0.0745191	1	1.06881	1.04519	1.01428	1.59443	1.96611	2.05649	1	1.15592	1.07098	1.58381	1.37557	2.08931	2.25081	1	1.01483	1.39446	1.1334	0.90118	1.36943	2.04327
AT1G51060.1	13934	| histone H2A 10 | Chr1:18926948-18927443 FORWARD LENGTH=132 | 201606	7	3	0.0227079	0.040086	0.175301	1	1.61807	1.68116	1.31169	0.872098	1.4718	1.32713	1	0.971881	0.998446	1.05779	0.652394	1.29204	1.46671	1	1.12406	1.44398	1.50107	0.954801	1.73406	1.61867
AT1G51100.1	24161	| potassium/sodium hyperpolarization-activated cyclic nucleotide-gated channel protein | Chr1:18934342-18934977 FORWARD LENGTH=211 | 201606	10	10	0.00682845	0.274141	0.0600985	1	1.3449	1.02844	1.35177	0.515561	1.47154	1.49907	1	1.63077	1.32409	1.26089	1.11819	1.72214	1.69436	1	1.38575	0.89005	0.701396	1.56911	0.948223	1.37182
AT1G51110.1	45765	| Plastid-lipid associated protein PAP / fibrillin family protein | Chr1:18935380-18937484 FORWARD LENGTH=409 | 201606	25	25	0.0426609	0.00167371	4.88254e-06	1	0.919505	0.790994	0.852891	0.859052	0.854791	0.667972	1	0.738505	0.610583	0.613186	0.525976	0.579531	0.533485	1	1.02845	0.714649	0.585099	0.716542	0.568862	0.658763
AT1G51360.1	23652	| dimeric A/B barrel domainS-protein 1 | Chr1:19044208-19044840 FORWARD LENGTH=210 | 201606	3	3	0.798597	0.740937	0.192134	1	0.592664	0.723678	0.741678	0.819378	0.430743	0.751005	1	0.936253	0.723598	0.854616	1.10896	0.562504	0.673393	1	0.339532	0.790656	1.25123	0.904481	0.870642	0.774635
AT1G51390.1	29972	| NFU domain protein 5 | Chr1:19050427-19051753 FORWARD LENGTH=275 | 201606	5	3	0.0579055	0.0315721	0.0740352	1	0.531072	0.606383	0.623395	0.785145	1.04217	1.45068	1	0.408715	0.754584	1.39257	1.08892	1.35123	1.59322	1	0.275376	0.677293	0.801915	0.837139	0.926102	0.929465
AT1G51400.1	11361	| Photosystem II 5 kD protein | Chr1:19052172-19052492 REVERSE LENGTH=106 | 201606	3	3	0.00706613	0.00190897	0.188617	1	1.24544	1.73684	2.86113	3.36167	2.43694	3.25717	1	2.76565	4.52215	4.20383	3.26568	2.69842	3.43742	1	1.14	1.32369	1.38758	0.984588	0.948384	1.60445
AT1G51500.1	76451	| ABC-2 type transporter family protein | Chr1:19097967-19100972 REVERSE LENGTH=687 | 201606	5	5	0.0190047	0.000759761	0.00126996	1	1.76732	1.4404	0.58721	0.989082	0.568864	0.044932	1	0.373901	0.346151	0.333611	0.0966027	0.56494	0.0238461	1	0.771697	0.562771	0.3802	0.270524	0.0260403	0.0277953
AT1G51510.1	22438	| RNA-binding (RRM/RBD/RNP motifs) family protein | Chr1:19103072-19104753 REVERSE LENGTH=202 | 201606	2	2	0.161387	0.000215712	0.121082	1	2.55055	0.122366	2.07376	1.40018	2.01906	0.127495	1	0.914165	0.0839006	0.620388	0.549151	2.92982	0.0786368	1	2.31564	0.138923	1.91702	2.59596	2.56881	0.133362
AT1G51560.1	43583	| Pyridoxamine 5'-phosphate oxidase family protein | Chr1:19119900-19121859 REVERSE LENGTH=392 | 201606	4	3	0.015611	0.0426545	0.115757	1	1.0768	0.0522821	0.905431	1.60169	1.20988	0.908937	1	3.33715	0.222211	8.11043	6.52306	5.04779	3.48983	1	4.80357	0.240568	4.80566	5.24265	3.59679	4.62604
AT1G51570.1	89154	| Calcium-dependent lipid-binding (CaLB domain) plant phosphoribosyltransferase family protein | Chr1:19122358-19124688 REVERSE LENGTH=776 | 201606	8	8	0.00820425	0.0674217	0.253097	1	3.0726	2.1286	2.6314	2.22392	4.24053	0.689695	1	1.6827	1.18942	1.665	1.81388	3.21778	3.02065	1	0.757412	1.58691	1.04831	1.31386	1.16029	1.76392
AT1G51630.1	47142	| O-fucosyltransferase family protein | Chr1:19142141-19144082 REVERSE LENGTH=423 | 201606	4	3	0.0125286	0.237962	0.222159	1	0.921964	3.34135	0.92119	0.143282	0.124594	0.130467	1	0.275418	0.651154	1.06454	0.0625285	0.244367	0.0600581	1	0.416982	0.395574	0.21844	0.0536144	0.0516085	0.0550867
AT1G51650.1	7832	| ATP synthase epsilon chain | Chr1:19152680-19153641 FORWARD LENGTH=70 | 201606	2	2	0.0205339	0.714633	0.110611	1	0.89448	1.50613	2.22503	4.95039	1.51477	3.08842	1	0.919987	1.60501	1.58644	1.03253	1.05154	0.768008	1	12.8706	19.3404	6.51391	12.0245	9.22338	12.3565
AT1G51660.1	40117	| mitogen-activated protein kinase kinase 4 | Chr1:19154575-19155675 FORWARD LENGTH=366 | 201606	6	3	0.108002	0.0653269	0.0481426	1	0.687228	1.34195	0.880147	0.887635	1.05115	1.69655	1	0.857383	0.939987	0.839736	1.95055	1.18397	1.96305	1	1.56524	1.56045	2.26459	2.48888	2.61227	2.20034
AT1G51680.1	61053	| 4-coumarate:CoA ligase 1 | Chr1:19159007-19161464 REVERSE LENGTH=561 | 201606	9	9	0.00092228	0.0550964	0.000230082	1	0.690906	0.8148	0.606895	0.538005	0.335907	0.23415	1	0.397684	0.606793	0.364512	0.42535	0.508842	0.305731	1	0.125716	0.204858	0.369887	0.900144	0.867894	0.241759
AT1G51680.2	53115	| 4-coumarate:CoA ligase 1 | Chr1:19159647-19161464 REVERSE LENGTH=490 | 201606	4	4	3.03547e-09	1.42216e-09	4.4115e-28	1	0.887847	0.866903	0.891703	0.99196	0.862579	24.0715	1	0.921884	0.846091	0.838015	0.825627	0.806983	21.0863	1	0.965456	0.967021	0.948178	0.903506	0.869703	18.5663
AT1G51680.3	58546	| 4-coumarate:CoA ligase 1 | Chr1:19159080-19161464 REVERSE LENGTH=539 | 201606	8	8	6.24999e-07	4.49967e-05	3.08873e-05	1	0.690906	0.00843259	0.606895	0.00964905	0.335907	0.23415	1	0.397684	0.0122675	0.364512	0.0119708	0.508842	0.305731	1	0.125716	0.012592	0.369887	0.0117649	0.867894	0.241759
AT1G51690.1	56935	| protein phosphatase 2A 55 kDa regulatory subunit B alpha isoform | Chr1:19166218-19169974 FORWARD LENGTH=513 | 201606	10	9	0.173108	0.118939	0.0851998	1	1.43695	1.00067	1.44491	0.681501	1.06248	1.18446	1	1.85783	2.0836	1.12578	1.23958	1.34971	1.76928	1	1.47411	0.893802	1.0085	0.540693	0.927768	0.866678
AT1G51690.3	67495	| protein phosphatase 2A 55 kDa regulatory subunit B alpha isoform | Chr1:19164124-19169974 FORWARD LENGTH=603 | 201606	9	8	6.66334e-05	0.000133208	5.5678e-05	1	62.1694	0.866903	0.891703	29.485	45.968	51.2453	1	55.4828	0.846091	0.838015	37.0192	40.3082	52.8383	1	73.8981	0.967021	0.948178	27.1052	46.5094	43.447
AT1G51700.1	21682	| DOF zinc finger protein 1 | Chr1:19174266-19174850 FORWARD LENGTH=194 | 201606	2	2	0.000639285	0.557724	0.448489	1	1.99339	0.0832667	0.0856488	0.0952785	0.0828514	0.608796	1	3.81568	0.846091	0.838015	0.825627	0.806983	5.6803	1	0.133924	0.134141	0.131527	0.12533	0.120641	0.128772
AT1G51710.1	53696	| ubiquitin-specific protease 6 | Chr1:19175805-19179894 REVERSE LENGTH=482 | 201606	17	17	0.0398541	0.0255277	0.271322	1	1.49768	0.963095	1.27879	0.939557	1.36805	1.72003	1	2.08633	1.86918	2.49843	2.95978	1.98202	2.68001	1	1.06517	1.12722	1.43784	1.05769	1.3177	1.12224
AT1G51760.1	48264	| peptidase M20/M25/M40 family protein | Chr1:19199562-19201424 FORWARD LENGTH=440 | 201606	18	18	0.00519115	2.48678e-06	2.92064e-05	1	0.722048	0.865934	0.830204	1.54844	1.66741	1.69322	1	0.913043	1.44478	2.26154	5.84449	2.87896	5.11694	1	0.646081	1.73935	3.17457	3.46577	4.84137	3.46771
AT1G51800.1	99639	| Leucine-rich repeat protein kinase family protein | Chr1:19214203-19217833 FORWARD LENGTH=894 | 201606	4	4	0.0126731	0.103279	1.64367e-06	1	0.887847	0.866903	0.891703	6.79254	0.862579	0.903238	1	0.921884	0.846091	5.84733	3.21255	0.806983	0.793008	1	0.965456	0.967021	12.6293	24.0343	25.9474	0.928317
AT1G51805.1	98076	| Leucine-rich repeat protein kinase family protein | Chr1:19221187-19225590 REVERSE LENGTH=884 | 201606	17	17	0.00156594	0.314135	0.0213502	1	1.45064	1.24784	1.50309	1.67372	1.50581	0.725667	1	1.11235	0.840899	1.09508	0.79745	0.902025	0.78932	1	0.764469	0.800879	0.880234	0.515013	0.537727	0.65535
AT1G51890.1	98563	| Leucine-rich repeat protein kinase family protein | Chr1:19274802-19278528 REVERSE LENGTH=876 | 201606	6	6	0.213743	0.0692329	1.02243e-10	1	0.887847	0.866903	0.891703	6.79254	3.41777	3.59736	1	0.921884	0.846091	11.2319	8.31836	3.1898	13.1563	1	0.965456	0.967021	9.94665	9.03506	98.6916	12.4027
AT1G51980.1	54402	| Insulinase (Peptidase family M16) protein | Chr1:19323692-19326771 REVERSE LENGTH=503 | 201606	37	25	2.68961e-05	0.00449693	0.0116123	1	0.847279	0.868575	1.14283	1.34883	1.32747	1.31625	1	0.927572	0.951537	1.18624	1.14591	1.24784	1.42561	1	0.892835	1.28693	1.34631	0.934583	1.43389	1.20059
AT1G52000.1	73939	| Mannose-binding lectin superfamily protein | Chr1:19333352-19335700 REVERSE LENGTH=730 | 201606	21	21	6.16196e-05	3.50009e-06	3.12478e-07	1	0.359316	0.315379	0.283225	0.877658	1.09349	1.20311	1	0.194502	0.410694	0.752265	0.345422	1.41338	1.55759	1	0.0155555	0.383313	0.317051	0.914753	0.53529	0.916607
AT1G52030.1	68849	| myrosinase-binding protein 2 | Chr1:19346090-19348282 REVERSE LENGTH=642 | 201606	4	1	2.59786e-07	1.1238e-06	8.34238e-07	1	0.0265472	0.0259209	0.10436	0.0296602	0.0257916	1.53034	1	0.03061	0.48528	0.556505	0.0274139	0.0267949	2.80058	1	0.0160794	0.0161055	0.0652207	0.0150476	0.0144846	0.773326
AT1G52030.3	60601	| myrosinase-binding protein 2 | Chr1:19346392-19348282 REVERSE LENGTH=570 | 201606	4	1	8.28705e-05	0.00303188	1.58258e-06	1	0.0265472	0.0259209	0.10436	0.0296602	0.0257916	0.0270074	1	0.03061	0.48528	0.556505	0.0274139	0.0267949	0.0263308	1	0.0160794	0.0161055	0.0652207	0.0150476	0.0144846	0.0154608
AT1G52040.1	50167	| myrosinase-binding protein 1 | Chr1:19350595-19352578 REVERSE LENGTH=462 | 201606	14	12	7.31258e-10	3.03844e-09	3.35955e-09	1	0.146408	0.043867	0.0728158	0.179425	0.59209	1.18679	1	0.424004	0.105454	0.387991	0.263584	1.08518	2.39679	1	0.0344723	0.119067	0.0963712	0.717798	0.398003	1.0382
AT1G52190.1	66904	| Major facilitator superfamily protein | Chr1:19434671-19438673 FORWARD LENGTH=607 | 201606	4	4	4.97179e-09	0.0910688	0.452784	1	2.06491	0.0866903	0.0891703	0.099196	0.0862579	0.0903238	1	0.547846	0.12148	0.12032	0.118542	0.115865	0.113858	1	3.88888	0.967021	0.948178	0.903506	0.869703	0.928317
AT1G52200.1	21179	| PLAC8 family protein | Chr1:19442271-19443407 REVERSE LENGTH=190 | 201606	3	3	0.00167212	0.00183643	0.0162084	1	0.887847	6.1075	9.28157	0.99196	31.8019	15.0193	1	0.921884	8.59784	19.4745	8.12158	10.7174	18.5641	1	0.965456	30.9206	27.9233	36.1256	25.9916	30.9982
AT1G52220.1	16946	| CURVATURE THYLAKOID protein | Chr1:19453770-19454605 REVERSE LENGTH=156 | 201606	3	3	0.0107548	0.162828	0.024983	1	20.8445	23.2404	0.891703	19.8392	22.9004	18.0326	1	1.78527	2.78324	0.12032	3.51319	3.91417	3.80396	1	3.67202	6.26297	0.135837	3.88103	2.49975	4.86616
AT1G52220.4	15432	| CURVATURE THYLAKOID protein | Chr1:19453978-19454605 REVERSE LENGTH=143 | 201606	2	2	0.00023566	0.00124716	0.00258797	1	20.8445	0.866903	0.891703	19.8392	0.862579	0.903238	1	1.78527	0.12148	0.12032	3.51319	0.115865	0.113858	1	3.67202	0.138537	0.135837	3.88103	0.124595	0.132992
AT1G52230.1	15274	| photosystem I subunit H2 | Chr1:19454902-19455508 FORWARD LENGTH=145 | 201606	32	8	0.0113136	0.0720604	0.091767	1	1.16338	1.13769	1.3106	0.948855	1.3223	1.51879	1	1.05556	1.18079	1.22467	0.909211	1.17584	1.16134	1	1.00592	1.2681	0.908853	1.0371	0.866574	0.902627
AT1G52280.1	23069	| RAB GTPase homolog G3D | Chr1:19468150-19469449 REVERSE LENGTH=206 | 201606	9	1	0.00877295	0.0385025	0.0228775	1	1.25214	0.740008	0.89893	1.29418	0.869364	0.318184	1	0.916568	0.376282	0.957595	1.3808	0.849668	0.712398	1	0.86188	0.6472	0.941343	0.611109	0.64832	0.463035
AT1G52320.1	87821	| kinesin-like protein | Chr1:19484490-19487204 FORWARD LENGTH=775 | 201606	3	3	0.0289996	0.0246324	0.00747768	1	17.8681	3.49996	0.891703	0.99196	14.2746	3.6263	1	2.19749	0.866589	0.120975	0.119187	5.0532	1.91823	1	3.85991	3.66662	0.948178	0.903506	20.1862	12.3735
AT1G52340.1	30272	| NAD(P)-binding Rossmann-fold superfamily protein | Chr1:19489997-19491527 REVERSE LENGTH=285 | 201606	6	6	0.163741	0.103932	0.00516181	1	0.853017	0.592869	0.526447	0.400144	0.508474	0.659711	1	0.62419	0.736476	0.653325	0.685995	0.369171	0.395234	1	0.56686	0.423483	0.488841	0.374862	0.423404	0.545459
AT1G52360.1	104467	| Coatomer%2C beta' subunit | Chr1:19499282-19505397 FORWARD LENGTH=926 | 201606	15	7	0.269054	0.00694835	9.07636e-07	1	2.34809	1.07196	2.39743	0.519773	1.4671	0.87346	1	1.16883	1.23784	3.51645	1.52727	1.92981	4.16123	1	1.76699	7.77338	12.683	0.223688	40.1837	29.8394
AT1G52380.1	46592	| NUP50 (Nucleoporin 50 kDa) protein | Chr1:19509979-19511301 FORWARD LENGTH=440 | 201606	6	6	0.000417357	0.000753433	0.00146531	1	0.889113	0.887132	1.40034	1.82715	1.59854	2.96745	1	1.01292	1.11369	1.38047	2.3487	1.9546	2.43982	1	2.30996	2.10752	3.40009	3.04975	3.62129	4.07114
AT1G52400.1	60459	| beta glucosidase 18 | Chr1:19515250-19517930 FORWARD LENGTH=528 | 201606	48	46	8.27643e-15	6.81971e-13	1.64122e-12	1	0.130498	0.118495	0.107183	0.3726	0.341568	0.354072	1	0.227616	0.483734	0.486996	0.501986	0.987623	1.91315	1	0.148369	0.266584	0.338627	0.930629	0.439491	0.953292
AT1G52410.2	84376	| TSK-associating protein 1 | Chr1:19520762-19525361 FORWARD LENGTH=759 | 201606	24	24	8.51869e-11	2.40627e-12	7.35104e-10	1	0.0537975	0.0523793	0.0385223	0.249272	0.366965	0.627825	1	0.230246	0.592651	0.568919	0.642556	1.60274	2.62682	1	0.043455	0.174582	0.256063	1.5707	0.617099	1.49345
AT1G52510.1	41839	| alpha/beta-Hydrolases superfamily protein | Chr1:19563039-19565260 REVERSE LENGTH=380 | 201606	22	22	0.00795647	0.0746547	0.379619	1	0.981559	0.754615	0.954222	0.958055	0.947013	0.794683	1	1.07562	0.743575	1.02726	0.898871	0.989482	0.963975	1	0.998586	1.09544	1.01417	0.871767	0.763883	0.945348
AT1G52600.1	20022	| Peptidase S24/S26A/S26B/S26C family protein | Chr1:19590612-19592486 FORWARD LENGTH=180 | 201606	4	4	0.00320902	0.102524	0.29459	1	4.60813	7.38201	0.227736	0.999077	1.5504	0.230682	1	0.0902473	2.17644	0.321171	1.56055	1.58441	0.0776311	1	1.36772	2.6441	0.52149	2.57145	3.27403	0.13151
AT1G52670.1	29574	| Single hybrid motif superfamily protein | Chr1:19615119-19617420 REVERSE LENGTH=274 | 201606	6	6	1.94142e-05	0.000549478	0.126982	1	0.632697	0.131332	0.831102	1.77433	0.309917	0.840586	1	0.421186	0.212587	0.447062	0.35121	0.144558	0.142398	1	0.689519	0.618707	1.01839	0.387891	0.248323	0.473077
AT1G52730.1	37754	| Transducin/WD40 repeat-like superfamily protein | Chr1:19642866-19644978 FORWARD LENGTH=343 | 201606	15	5	0.000152367	0.0469578	0.948173	1	1.29574	1.33234	1.09639	1.33263	0.926742	1.63289	1	1.10717	1.5754	1.09469	1.18195	1.16789	1.17675	1	0.893073	0.975259	0.822514	1.03779	0.91589	0.998121
AT1G52740.1	14272	| histone H2A protein 9 | Chr1:19645409-19646221 FORWARD LENGTH=134 | 201606	6	4	0.00390757	0.00172954	5.20405e-05	1	1.85176	0.86453	1.40773	1.88876	2.65067	1.50164	1	1.63154	2.3428	1.41363	1.50115	2.42285	1.94814	1	1.57105	2.37612	3.42235	3.83752	4.67449	3.25099
AT1G52760.1	36975	| lysophospholipase 2 | Chr1:19651378-19652576 FORWARD LENGTH=332 | 201606	4	4	0.172869	0.0216458	0.615466	1	14.6627	6.03597	6.17376	6.79254	6.20101	0.903238	1	0.955093	1.58498	2.91373	5.71182	4.21616	4.17851	1	1.66648	3.15238	3.11629	4.49754	4.29268	1.67551
AT1G52780.1	119958	| PII%2C uridylyltransferase (DUF2921) | Chr1:19658846-19662025 FORWARD LENGTH=1059 | 201606	17	17	0.0102798	0.000688022	0.0347589	1	0.815452	1.07274	0.710376	0.871021	0.960363	0.541224	1	1.03768	2.04942	1.2307	1.61341	2.72524	1.78626	1	1.92992	2.16273	2.58367	2.25797	3.36823	1.50483
AT1G52870.2	41331	| Peroxisomal membrane 22 kDa (Mpv17/PMP22) family protein | Chr1:19685856-19687678 FORWARD LENGTH=366 | 201606	1	1	0.0926215	0.305013	0.934661	1	0.887847	0.722039	0.742618	0.99196	0.862579	0.466131	1	0.923019	0.860471	1.35983	0.653272	0.818103	0.961693	1	0.823514	0.978952	0.952277	0.769507	0.988629	0.792245
AT1G53000.1	32245	| Nucleotide-diphospho-sugar transferases superfamily protein | Chr1:19745330-19747133 REVERSE LENGTH=290 | 201606	9	9	0.214199	0.151076	0.0266435	1	1.47354	1.22613	1.33263	1.07101	1.1497	1.20207	1	1.11268	0.674985	1.11922	1.04664	1.35033	1.10695	1	1.58277	1.36768	1.41837	0.710349	0.81201	0.729859
AT1G53165.1	75447	| Protein kinase superfamily protein | Chr1:19814386-19819233 FORWARD LENGTH=680 | 201606	5	5	0.247967	0.342632	0.254444	1	1.19728	1.65229	0.796908	0.768345	0.868034	0.809046	1	2.34779	2.53345	2.68233	1.91976	2.25595	1.25875	1	1.92426	1.50166	1.09233	1.4168	1.50331	0.794734
AT1G53210.1	63417	| sodium/calcium exchanger family protein / calcium-binding EF hand family protein | Chr1:19844790-19847533 FORWARD LENGTH=585 | 201606	18	18	0.00118253	0.542202	0.0666595	1	1.79827	1.46374	1.14739	0.75571	1.1793	0.482572	1	0.994714	0.934514	0.918895	1.1586	1.23346	0.748985	1	0.869535	1.12985	1.16579	0.887466	0.795858	0.526546
AT1G53240.1	35804	| Lactate/malate dehydrogenase family protein | Chr1:19854966-19856802 REVERSE LENGTH=341 | 201606	51	26	0.000109957	0.0367645	0.0480248	1	0.99309	0.894627	1.07192	1.15239	1.03665	1.25537	1	1.22349	0.931922	1.07703	1.10449	1.12541	1.17065	1	1.19689	1.09187	0.935194	0.949881	1.0915	1.15386
AT1G53280.1	46991	| Class I glutamine amidotransferase-like superfamily protein | Chr1:19864942-19867341 REVERSE LENGTH=438 | 201606	27	27	0.00075614	0.131254	0.00759264	1	1.25109	1.50031	1.35983	0.830198	1.42372	1.50876	1	1.27738	1.31146	1.28341	1.0742	1.14737	1.35801	1	1.28898	0.963405	0.919934	0.904286	1.10772	1.05532
AT1G53310.1	110286	| phosphoenolpyruvate carboxylase 1 | Chr1:19884261-19888070 REVERSE LENGTH=967 | 201606	79	33	3.91873e-06	6.95493e-06	7.74057e-06	1	1.43963	1.29238	1.1572	1.32619	1.23124	0.614352	1	0.997744	1.25948	1.48967	1.93855	1.39795	1.26564	1	1.37567	1.19195	1.63049	1.47457	1.74274	1.1368
AT1G53430.1	114945	| Leucine-rich repeat transmembrane protein kinase | Chr1:19935298-19940959 FORWARD LENGTH=1038 | 201606	14	6	0.0708691	0.0152349	0.0161337	1	1.72564	1.23655	1.41057	1.47722	1.48765	0.394645	1	0.559985	0.600433	0.934126	0.695219	1.14568	0.802675	1	1.86017	1.56169	2.37942	1.09431	1.29847	0.858635
AT1G53430.2	110231	| Leucine-rich repeat transmembrane protein kinase | Chr1:19936073-19940959 FORWARD LENGTH=997 | 201606	13	6	0.000734996	2.46874e-06	7.53868e-05	1	0.887847	57.4736	65.5617	68.6594	69.1442	18.3427	1	0.921884	39.5389	61.5127	45.7806	75.4441	52.8566	1	0.965456	72.9813	111.195	51.1395	60.6802	40.1258
AT1G53440.1	114851	| Leucine-rich repeat transmembrane protein kinase | Chr1:19945959-19951562 FORWARD LENGTH=1035 | 201606	11	1	1.04669e-07	3.88389e-09	2.23209e-05	1	71.2366	0.866903	35.7345	0.99196	0.862579	0.903238	1	27.4576	0.846091	52.9576	0.825627	0.806983	0.793008	1	51.6434	0.967021	59.9273	0.903506	0.869703	0.928317
AT1G53500.1	75226	| NAD-dependent epimerase/dehydratase family protein | Chr1:19967157-19969239 REVERSE LENGTH=667 | 201606	22	7	0.000310959	4.43158e-06	0.00108299	1	0.856495	0.44669	0.608087	0.723736	0.34493	0.707333	1	0.776397	0.6364	0.526401	0.628989	0.378326	0.297821	1	0.868523	0.688212	0.54099	0.706779	0.390466	0.61735
AT1G53520.1	30729	| Chalcone-flavanone isomerase family protein | Chr1:19976485-19977915 REVERSE LENGTH=287 | 201606	7	7	0.00628092	0.00196148	0.023739	1	2.35919	1.34571	1.14107	1.43027	2.37121	0.991634	1	1.63976	0.998644	0.633374	1.86367	2.45976	1.47722	1	1.38612	0.764589	0.648984	1.63412	1.13529	0.983722
AT1G53580.1	32332	| glyoxalase II 3 | Chr1:19991542-19993250 REVERSE LENGTH=294 | 201606	11	11	2.91863e-05	0.00203244	0.000197515	1	0.894655	1.16224	1.85577	0.927222	2.25762	1.87571	1	0.927402	1.50901	1.86719	1.82806	2.07502	2.20594	1	0.912857	1.46129	2.44293	1.85505	2.73223	2.6342
AT1G53670.1	22607	| methionine sulfoxide reductase B 1 | Chr1:20036687-20038074 FORWARD LENGTH=202 | 201606	4	4	0.438731	0.0464862	0.000132972	1	0.735672	0.673267	0.73899	0.874293	0.430737	0.799625	1	0.546046	0.586587	0.672485	0.567712	0.217115	0.254681	1	0.909994	0.745693	0.936266	0.351838	0.150196	0.309474
AT1G53730.1	78085	| STRUBBELIG-receptor family 6 | Chr1:20061771-20065475 FORWARD LENGTH=719 | 201606	4	3	0.0243823	0.0815819	0.0287644	1	1.0476	0.944687	0.806254	0.626756	0.470096	0.65428	1	0.604982	0.625336	0.891061	0.466631	0.527773	0.323865	1	1.18007	1.08517	1.26793	0.807063	0.583119	0.618878
AT1G53750.1	47803	| regulatory particle triple-A 1A | Chr1:20065921-20068324 REVERSE LENGTH=426 | 201606	27	25	0.0139313	0.0110742	0.0117149	1	0.699093	0.707957	0.915164	1.01588	0.627565	0.701788	1	1.09075	0.994039	1.215	1.29655	0.771924	1.04807	1	1.18441	1.27973	1.4207	1.12075	1.12065	1.27975
AT1G53760.1	30607	| K+-H+ exchange-like protein | Chr1:20069159-20070918 REVERSE LENGTH=272 | 201606	2	2	0.00320602	0.00028432	5.37561e-05	1	11.8683	17.3664	8.91703	9.9196	11.4649	0.903238	1	15.4505	8.46091	11.2319	16.1442	21.521	0.793008	1	12.9028	19.3404	9.48178	6.35775	26.1906	0.928317
AT1G53760.2	24032	| K+-H+ exchange-like protein | Chr1:20069266-20070918 REVERSE LENGTH=212 | 201606	1	1	0.000543409	0.000424707	6.88861e-06	1	11.8683	17.3664	8.91703	9.9196	0.862579	0.903238	1	15.4505	8.46091	11.2319	16.1442	0.806983	0.793008	1	12.9028	19.3404	9.48178	6.35775	0.869703	0.928317
AT1G53780.1	66932	| 26S proteasome regulatory complex ATPase | Chr1:20074212-20077235 REVERSE LENGTH=599 | 201606	3	1	0.017213	0.00239174	0.00169219	1	9.55835	11.5663	23.7694	13.6749	0.862579	0.903238	1	18.3321	25.4993	16.7603	16.0758	0.806983	0.793008	1	22.551	9.47985	9.48178	27.0091	0.869703	0.928317
AT1G53830.1	64173	| pectin methylesterase 2 | Chr1:20098562-20100745 FORWARD LENGTH=587 | 201606	7	1	1.95861e-10	2.79897e-08	0.000204703	1	0.887847	80.839	136.604	92.7509	129.357	24.1037	1	0.921884	116.024	100.899	96.0548	126.252	124.177	1	0.965456	91.5234	125.667	87.5534	131.03	108.031
AT1G53840.1	64149	| pectin methylesterase 1 | Chr1:20101533-20103458 FORWARD LENGTH=586 | 201606	4	4	0.0118602	0.195619	0.0762524	1	0.696835	1.05091	0.828511	0.992932	0.187565	0.515632	1	0.780391	0.543306	0.595609	0.360642	0.516957	0.499926	1	0.810726	1.07452	1.03472	0.754027	0.0892323	0.699366
AT1G53850.1	25947	| 20S proteasome alpha subunit E1 | Chr1:20104131-20105792 REVERSE LENGTH=237 | 201606	17	2	0.0620789	0.0734118	0.603053	1	0.971116	0.747653	1.07881	1.06071	0.892714	1.17532	1	0.898469	0.890044	1.04962	1.26497	0.836626	0.935662	1	1.13241	1.03716	1.22158	1.07632	0.929013	1.07401
AT1G54000.1	43194	| GDSL-like Lipase/Acylhydrolase superfamily protein | Chr1:20154548-20156365 REVERSE LENGTH=391 | 201606	12	10	0.286434	1.12951e-07	3.44153e-06	1	3.49075	8.66903	11.8987	0.99196	9.09598	6.33827	1	3.61031	19.8041	61.5502	168.477	96.6656	152.831	1	38.702	85.5243	75.293	114.303	170.961	164.109
AT1G54010.1	43143	| GDSL-like Lipase/Acylhydrolase superfamily protein | Chr1:20158854-20160747 REVERSE LENGTH=386 | 201606	19	17	2.86173e-07	1.33438e-08	8.34925e-10	1	0.227576	0.177541	0.22921	0.101145	0.21925	0.25495	1	0.439735	1.11265	2.04663	7.13176	5.51476	6.98691	1	1.57377	6.35782	7.10482	11.2028	13.2833	15.5865
AT1G54050.1	17363	| HSP20-like chaperones superfamily protein | Chr1:20179558-20180122 REVERSE LENGTH=155 | 201606	3	3	1.91932e-05	6.12381e-15	0.0152257	1	0.887847	0.866903	0.891703	0.99196	0.862579	0.903238	1	0.921884	0.846091	0.838015	30.0047	0.806983	0.793008	1	0.965456	0.967021	0.948178	0.903506	0.869703	0.928317
AT1G54080.1	47234	| oligouridylate-binding protein 1A | Chr1:20183923-20186824 REVERSE LENGTH=426 | 201606	7	2	2.52401e-05	5.7925e-06	5.41732e-08	1	0.015635	1.11965	0.0157029	0.863009	0.605173	0.015906	1	0.0174379	1.33617	0.0158514	0.920506	0.813221	0.0150001	1	0.0111708	0.594151	0.0109709	0.557457	0.570443	0.0107411
AT1G54090.1	70771	| exocyst subunit exo70 family protein D2 | Chr1:20189737-20191605 FORWARD LENGTH=622 | 201606	7	5	0.00146142	0.138065	0.0755199	1	0.564471	1.26845	0.566447	0.813499	1.02538	0.172778	1	0.657244	1.4347	1.54563	1.37642	1.9455	1.12355	1	1.51443	1.87183	1.87753	1.54267	0.991434	0.663363
AT1G54100.1	54208	| aldehyde dehydrogenase 7B4 | Chr1:20195435-20198853 REVERSE LENGTH=508 | 201606	31	31	0.00019523	1.32636e-10	1.23554e-07	1	1.77676	2.06976	2.22279	1.8217	3.00841	0.60232	1	1.53386	2.4065	3.07213	6.86347	4.05153	4.17105	1	2.32925	3.67183	3.75737	4.05573	6.93018	3.20287
AT1G54140.1	20597	| TATA binding protein associated factor 21kDa subunit | Chr1:20214076-20214869 REVERSE LENGTH=183 | 201606	2	2	0.00287295	0.000154985	2.48436e-05	1	0.887847	8.66903	14.6916	0.99196	17.1137	15.0391	1	0.921884	14.0395	11.2319	5.53788	10.8036	21.0863	1	0.965456	9.67021	3.91605	18.0701	8.69703	6.50186
AT1G54220.1	58468	| Dihydrolipoamide acetyltransferase%2C long form protein | Chr1:20246460-20250208 REVERSE LENGTH=539 | 201606	18	15	0.0197408	0.0124769	0.0428745	1	1.05587	0.727242	1.18179	0.991848	0.980608	1.17486	1	1.82309	0.974821	1.42878	1.27982	1.13548	1.74491	1	1.16607	0.937812	0.793822	0.79793	0.791806	0.842604
AT1G54270.1	46763	| eif4a-2 | Chr1:20260495-20262018 FORWARD LENGTH=412 | 201606	50	10	3.22919e-05	4.72882e-08	0.0205987	1	0.834768	0.908051	0.959162	0.994156	0.691458	0.402956	1	0.799107	0.968512	0.868541	1.22671	0.739614	0.663648	1	1.12278	1.12085	1.10261	1.11493	1.20422	0.758039
AT1G54320.1	38955	| LEM3 (ligand-effect modulator 3) family protein / CDC50 family protein | Chr1:20275732-20277793 REVERSE LENGTH=349 | 201606	4	2	0.485929	0.000119665	1.48473e-10	1	0.887847	0.866903	0.891703	0.99196	3.41777	0.903238	1	0.921884	0.846091	0.838015	16.1442	10.7174	0.793008	1	0.965456	0.967021	0.948178	6.35775	37.6245	0.928317
AT1G54340.1	47234	| isocitrate dehydrogenase | Chr1:20283520-20286506 FORWARD LENGTH=416 | 201606	11	2	0.0496406	0.826661	0.0321167	1	1.00856	0.953937	0.87938	0.796542	0.676618	0.815164	1	1.14712	1.22777	1.17097	1.11087	0.981985	1.0283	1	1.09698	1.10924	0.882319	0.842999	0.975207	0.819128
AT1G54350.1	80054	| ABC transporter family protein | Chr1:20286917-20290245 FORWARD LENGTH=706 | 201606	3	3	0.00514363	0.264178	0.0289121	1	0.890592	0.20954	0.215619	0.0598242	0.547247	0.0544735	1	0.468791	0.0425936	0.169693	0.178412	0.834928	0.41509	1	1.34623	0.416601	0.414083	0.0539984	0.69194	0.40447
AT1G54490.1	107778	| exoribonuclease 4 | Chr1:20350300-20356650 FORWARD LENGTH=947 | 201606	3	3	0.791648	0.628065	0.0927392	1	0.632687	0.634765	0.476238	0.275965	0.423753	0.0643655	1	0.339856	1.09325	0.806305	0.77158	1.75533	1.49173	1	1.75185	2.347	3.16389	0.223688	5.0086	3.1292
AT1G54500.1	21875	| Rubredoxin-like superfamily protein | Chr1:20357084-20357671 REVERSE LENGTH=195 | 201606	3	3	0.00766816	0.306944	0.000343704	1	1.21147	0.0323948	0.774323	0.509893	0.749659	0.0337526	1	1.7578	0.043706	1.0065	0.719514	0.706613	1.10543	1	0.646553	0.0242285	0.392506	0.678747	0.435804	0.310745
AT1G54520.1	42844	| myelin-associated oligodendrocyte basic protein | Chr1:20363565-20365874 FORWARD LENGTH=391 | 201606	8	8	0.00108676	0.00655327	0.422381	1	1.54697	2.008	1.25738	0.736008	0.707845	0.164973	1	1.14115	2.22555	2.50505	1.71929	1.41111	0.590684	1	1.40932	1.33812	1.61892	1.15397	0.953117	0.338003
AT1G54560.1	173609	| Myosin family protein with Dil domain-containing protein | Chr1:20371649-20379745 REVERSE LENGTH=1529 | 201606	4	1	1.12124e-08	0.000154485	2.96787e-05	1	0.887847	20.1842	0.891703	0.99196	0.862579	0.903238	1	0.921884	16.8871	0.838015	0.825627	0.806983	0.793008	1	0.965456	18.7956	0.948178	0.903506	0.869703	0.928317
AT1G54570.1	78204	| Esterase/lipase/thioesterase family protein | Chr1:20380649-20384953 REVERSE LENGTH=704 | 201606	7	7	0.00500839	6.46612e-07	6.2623e-05	1	0.690947	0.389818	0.117344	0.667004	0.965463	0.0303674	1	0.474562	1.11163	0.431392	4.92508	1.88303	2.64033	1	0.979396	9.43216	10.384	9.9079	25.6154	4.69923
AT1G54580.1	14528	| acyl carrier protein 2 | Chr1:20389572-20390770 FORWARD LENGTH=136 | 201606	6	2	0.00054652	0.153323	0.00124497	1	1.13946	0.954823	0.847785	0.706134	0.575672	0.811117	1	1.4835	1.5541	1.26213	0.967526	1.15759	1.11098	1	1.29393	0.933379	0.944772	0.782393	0.732081	0.951464
AT1G54630.1	14650	| acyl carrier protein 3 | Chr1:20401642-20402919 REVERSE LENGTH=136 | 201606	7	2	0.0239209	0.0144308	0.0266288	1	0.761039	0.864224	0.696105	0.669834	0.516543	0.847591	1	0.954207	0.945092	0.77425	0.557104	0.729916	0.70343	1	1.26175	0.829949	0.904117	0.746731	0.911956	0.869438
AT1G54780.1	31139	| thylakoid lumen 18.3 kDa protein | Chr1:20439533-20440953 FORWARD LENGTH=285 | 201606	34	34	0.0339844	0.00097578	0.000894757	1	1.19746	1.05632	1.206	1.1589	1.39577	1.00856	1	1.28549	1.01029	1.35147	1.19237	1.20389	1.22605	1	1.29171	1.21729	1.2336	0.934427	0.987444	1.02326
AT1G55020.1	98045	| lipoxygenase 1 | Chr1:20525798-20530143 FORWARD LENGTH=859 | 201606	14	14	1.09467e-07	3.946e-05	0.0060147	1	0.887847	17.3381	0.891703	0.99196	0.862579	3.6152	1	0.921884	31.1126	47.1916	55.6787	112.986	87.2492	1	0.965456	42.7285	31.0708	66.0572	129.859	37.0574
AT1G55060.1	25843	| ubiquitin 12 | Chr1:20549533-20550225 FORWARD LENGTH=230 | 201606	20	1	1.4358e-10	7.61258e-11	5.62087e-14	1	0.887847	0.866903	0.891703	0.99196	504.231	0.903238	1	0.921884	0.846091	0.838015	0.825627	594.403	0.793008	1	0.965456	0.967021	0.948178	0.903506	886.755	0.928317
AT1G55090.1	80901	| carbon-nitrogen hydrolase family protein | Chr1:20554857-20558188 FORWARD LENGTH=725 | 201606	7	7	0.00728221	0.538816	0.128314	1	1.66054	1.19362	1.33755	0.376382	1.08203	0.135569	1	0.535065	0.866065	1.10107	0.813112	1.40805	0.802508	1	1.79011	1.45236	1.73159	1.28793	1.47911	0.277266
AT1G55160.1	20828	| WAS/WASL-interacting family protein | Chr1:20578476-20579803 FORWARD LENGTH=188 | 201606	6	5	0.932312	0.0222757	0.217529	1	1.18313	1.06115	1.09294	1.09661	1.34432	1.31257	1	0.825071	1.32395	1.12829	0.627102	1.43974	1.59155	1	1.92851	1.34601	1.35314	1.67735	1.85782	1.71793
AT1G55160.2	15423	| WAS/WASL-interacting family protein | Chr1:20578804-20579803 FORWARD LENGTH=137 | 201606	5	4	4.28765e-07	3.89355e-05	2.4613e-11	1	0.887847	0.866903	0.891703	32.7294	0.862579	0.903238	1	0.921884	0.846091	0.838015	18.7279	0.806983	0.793008	1	0.965456	0.967021	0.948178	39.2111	0.869703	0.928317
AT1G55160.3	23844	| WAS/WASL-interacting family protein | Chr1:20578476-20579803 FORWARD LENGTH=213 | 201606	5	5	7.95484e-12	3.56161e-05	1.83988e-06	1	0.887847	0.866903	32.62	0.99196	0.862579	0.903238	1	0.921884	0.846091	33.6956	0.825627	0.806983	0.793008	1	0.965456	0.967021	31.6321	0.903506	0.869703	0.928317
AT1G55210.1	20618	| Disease resistance-responsive (dirigent-like protein) family protein | Chr1:20598057-20598620 REVERSE LENGTH=187 | 201606	4	4	0.0364615	0.0438594	0.042706	1	0.907974	0.0866903	0.617376	0.99196	1.73895	1.50391	1	0.897993	0.431623	0.427706	1.43704	1.96953	1.54531	1	2.36467	0.774068	0.921553	1.10526	2.33425	2.73445
AT1G55265.1	19137	| DUF538 family protein%2C putative (Protein of unknown function%2C DUF538) | Chr1:20617326-20617853 FORWARD LENGTH=175 | 201606	5	5	6.21176e-06	2.40348e-06	0.000957362	1	2.31363	5.75941	9.7008	4.88207	17.9273	15.7828	1	5.56692	8.92816	7.32536	9.85509	17.6375	30.5863	1	3.74348	4.40846	4.2652	4.0879	8.41123	6.89256
AT1G55450.1	34475	| S-adenosyl-L-methionine-dependent methyltransferases superfamily protein | Chr1:20705274-20706825 REVERSE LENGTH=311 | 201606	13	12	0.986032	0.169036	0.104664	1	1.02015	1.02335	0.98696	1.06382	1.01787	0.871944	1	1.06207	1.13752	1.24604	1.38079	0.872976	0.748232	1	1.20803	1.39747	1.66037	1.25802	1.33557	1.36185
AT1G55480.1	37410	| protein containing PDZ domain%2C a K-box domain%2C and a TPR region | Chr1:20713822-20715351 FORWARD LENGTH=335 | 201606	37	37	0.000623383	0.00540554	0.118779	1	1.09228	1.18468	1.5227	1.34786	1.48502	1.6494	1	1.36008	1.21557	1.43849	1.10963	1.31286	1.36701	1	1.16756	1.30542	1.19505	1.01094	1.07431	1.27542
AT1G55490.1	63809	| chaperonin 60 beta | Chr1:20715717-20718673 REVERSE LENGTH=600 | 201606	84	28	7.1431e-05	1.7422e-05	7.09251e-08	1	0.924335	1.03909	1.00229	1.10897	0.732778	1.09423	1	0.917498	1.0423	0.810608	0.765264	0.636468	0.601581	1	0.883634	0.741341	0.79041	0.899832	0.634766	0.704393
AT1G55500.2	65969	| evolutionarily conserved C-terminal region 4 | Chr1:20719747-20722416 FORWARD LENGTH=599 | 201606	4	2	0.0039802	0.00445776	4.41314e-06	1	0.884955	0.646038	0.0664519	1.23994	0.0642816	1.34531	1	0.632505	3.67953	0.0838015	2.18168	0.0806983	1.83824	1	1.28448	1.27965	0.0948178	3.62363	0.0869703	0.928317
AT1G55670.1	17085	| photosystem I subunit G | Chr1:20802874-20803356 REVERSE LENGTH=160 | 201606	3	3	0.472824	0.466963	0.198472	1	1.10826	2.37163	2.00554	1.99633	2.37215	1.79479	1	1.3711	2.46761	1.63978	1.79514	2.18333	1.20339	1	1.13571	3.09837	1.30934	2.31194	1.53461	1.63632
AT1G55805.1	17672	| BolA-like family protein | Chr1:20858956-20859438 REVERSE LENGTH=160 | 201606	2	2	0.0348353	0.0290055	0.152927	1	3.57869	20.0536	0.891703	7.03895	6.0706	21.0781	1	9.34142	14.1908	0.838015	0.825627	13.7978	13.1563	1	1.25576	0.681472	0.0926973	1.17413	0.888142	1.81226
AT1G55810.1	52443	| uridine kinase-like 3 | Chr1:20861273-20864003 FORWARD LENGTH=466 | 201606	3	1	3.90738e-07	0.00107294	0.00246523	1	0.0331775	0.323948	0.0333215	0.146181	0.0322332	0.0337526	1	0.0567693	1.21021	0.0516047	0.663442	0.0496937	0.0488332	1	0.0965456	0.366662	0.0948178	0.634461	0.0869703	0.0928317
AT1G55810.7	50765	| uridine kinase-like 3 | Chr1:20861193-20864003 FORWARD LENGTH=451 | 201606	4	2	1.29893e-08	7.90889e-05	0.000103419	1	0.0331775	0.323948	0.0333215	0.037068	0.0322332	0.0337526	1	0.0567693	1.21021	0.0516047	0.0508418	0.0496937	0.0488332	1	0.0965456	0.366662	0.0948178	0.0903506	0.0869703	0.0928317
AT1G55850.1	82347	| cellulose synthase like E1 | Chr1:20876752-20879414 FORWARD LENGTH=729 | 201606	11	11	0.00332179	1.17442e-05	0.00622428	1	3.84635	3.34135	2.58007	1.44346	6.59147	0.130467	1	1.76626	2.42391	4.8047	14.0897	15.164	17.5529	1	2.76255	9.40895	4.49426	10.355	13.6167	7.08083
AT1G55860.1	405001	| LOW protein: E3 ubiquitin ligase-like protein | Chr1:20879900-20892910 REVERSE LENGTH=3681 | 201606	5	4	0.00519049	0.033553	0.000181751	1	0.226751	2.21402	0.92835	0.253341	2.20298	0.230682	1	0.921884	13.9229	8.38015	16.2127	21.6028	18.5641	1	0.0708593	0.709413	0.952902	0.494547	4.04537	0.274192
AT1G55890.1	44994	| Tetratricopeptide repeat (TPR)-like superfamily protein | Chr1:20901364-20902560 FORWARD LENGTH=398 | 201606	4	4	0.19286	0.0449065	0.33394	1	1.12066	3.03535	1.13918	1.25618	1.11299	1.14496	1	0.704705	2.36939	1.06606	2.06272	1.44238	1.00569	1	0.69016	0.54248	0.807212	0.777821	0.750913	0.397476
AT1G55900.1	42640	| Haloacid dehalogenase-like hydrolase (HAD) superfamily protein | Chr1:20903163-20905420 FORWARD LENGTH=376 | 201606	5	5	0.00139538	0.124045	0.026197	1	0.128244	1.29035	3.42375	2.36377	2.08179	0.519615	1	0.0470074	1.00388	1.42351	1.21495	0.681488	0.53552	1	0.0413378	1.06163	1.21319	0.64571	0.74476	0.662634
AT1G55930.1	72929	| CBS domain-containing protein / transporter associated domain-containing protein | Chr1:20918895-20922133 FORWARD LENGTH=653 | 201606	3	2	0.00991762	0.00495046	0.00165026	1	8.87847	3.49996	0.891703	0.99196	3.41777	0.903238	1	6.59745	0.846091	0.838015	13.9288	13.4059	0.793008	1	7.13712	0.967021	0.948178	6.35775	20.2304	0.928317
AT1G55980.1	51210	| FAD/NAD(P)-binding oxidoreductase family protein | Chr1:20938899-20941767 REVERSE LENGTH=468 | 201606	6	6	0.0931462	0.17512	0.0445735	1	0.952665	0.520154	0.831413	0.596138	0.802164	1.08788	1	1.05727	0.579164	0.709314	0.758588	0.92293	1.0317	1	1.08059	0.445293	0.549578	0.583486	0.5634	0.711977
AT1G56050.1	45628	| GTP-binding protein-like protein | Chr1:20963793-20966181 FORWARD LENGTH=421 | 201606	25	25	0.00648258	0.24597	0.645902	1	1.01548	0.975101	1.21978	1.11641	1.2107	1.5698	1	0.779823	0.770534	0.878054	0.734909	0.784339	0.912366	1	1.21825	1.04815	1.08648	1.038	1.09255	1.27754
AT1G56070.1	93891	| Ribosomal protein S5/Elongation factor G/III/V family protein | Chr1:20968245-20971077 REVERSE LENGTH=843 | 201606	128	85	8.20724e-05	1.7174e-05	0.000620724	1	0.924126	0.885654	0.91918	0.931683	0.764061	0.726749	1	0.941637	1.03569	1.01314	1.13104	0.79975	0.830596	1	1.17369	0.99662	1.11287	1.09746	1.05605	0.987022
AT1G56110.1	58673	| NOP56-like pre RNA processing ribonucleoprotein | Chr1:20984544-20986893 REVERSE LENGTH=522 | 201606	12	12	0.000100566	0.0467892	0.000830974	1	0.862063	0.922671	1.00146	0.748427	0.49716	0.164978	1	0.690234	1.19916	0.718351	0.914651	0.606134	0.476421	1	0.806419	0.605575	0.661814	0.677694	0.363274	0.310276
AT1G56190.1	49939	| Phosphoglycerate kinase family protein | Chr1:21028403-21030454 FORWARD LENGTH=478 | 201606	102	30	0.0328699	0.0636496	0.0839696	1	0.847035	1.04156	1.07371	1.05487	1.04575	1.08458	1	0.928996	0.918999	1.00921	0.858614	0.835774	0.825016	1	0.898032	1.04361	0.972082	0.936065	0.868844	1.00288
AT1G56330.1	21986	| secretion-associated RAS 1B | Chr1:21086845-21088478 REVERSE LENGTH=193 | 201606	19	5	0.00152897	0.0507399	0.142391	1	1.06224	1.23419	0.896026	0.944578	0.736374	0.613894	1	0.772295	1.1779	0.967131	1.13111	1.1594	0.872227	1	0.921079	1.23701	0.97411	0.976368	1.15361	0.739908
AT1G56340.1	48527	| calreticulin 1a | Chr1:21090059-21092630 REVERSE LENGTH=425 | 201606	6	6	0.466985	0.603123	4.62463e-06	1	0.887847	0.866903	0.891703	0.99196	0.862579	3.6152	1	0.921884	0.846091	0.838015	0.825627	3.22662	3.22652	1	0.965456	0.967021	0.948178	0.903506	11.5334	40.2984
AT1G56410.1	68357	| heat shock protein 70 (Hsp 70) family protein | Chr1:21117147-21119241 FORWARD LENGTH=617 | 201606	48	1	1.54405e-15	9.96584e-11	7.08973e-14	1	1079.73	1091.74	0.891703	1131.44	0.862579	1453.92	1	1125.33	1254.14	0.838015	1385.26	0.806983	1136.61	1	1322.56	1243.51	0.948178	1382.66	0.869703	1315.23
AT1G56450.1	27651	| 20S proteasome beta subunit G1 | Chr1:21141970-21144186 FORWARD LENGTH=246 | 201606	15	15	0.0194696	0.00112547	0.000640946	1	0.833142	0.943946	1.06366	1.15606	0.915375	0.628541	1	0.898362	0.766049	0.782164	1.05696	0.741913	0.686457	1	0.865074	0.916822	1.03197	0.78633	1.06172	0.771553
AT1G56500.1	114402	| haloacid dehalogenase-like hydrolase family protein | Chr1:21159775-21167092 FORWARD LENGTH=1055 | 201606	50	50	0.345167	0.127817	1.09612e-05	1	1.00208	0.982978	1.0052	0.872004	0.823009	0.837713	1	0.929554	0.79996	0.919596	0.654612	0.794167	0.699543	1	0.864498	0.864168	0.748075	0.652089	0.512209	0.629285
AT1G56560.1	70437	| Plant neutral invertase family protein | Chr1:21192593-21194948 FORWARD LENGTH=616 | 201606	7	6	0.0360547	0.116406	0.551502	1	1.77664	2.32476	2.53104	2.47574	3.31422	1.06021	1	0.557343	1.17239	1.53701	1.30351	1.44146	1.25903	1	1.12872	1.56624	1.87059	1.65672	1.44345	1.23835
AT1G56580.1	18406	| plant/protein (Protein of unknown function%2C DUF538) | Chr1:21198402-21198902 REVERSE LENGTH=166 | 201606	4	4	0.0652995	0.000628281	2.8556e-05	1	1.0257	0.884875	0.394682	0.168683	0.0375723	0.0393434	1	0.365379	0.560136	0.38753	0.0627021	0.271308	0.0157804	1	0.964383	0.422326	0.224961	0.31385	0.0289901	0.0309439
AT1G57720.1	46400	| Translation elongation factor EF1B%2C gamma chain | Chr1:21377873-21380114 FORWARD LENGTH=413 | 201606	46	29	1.94912e-09	0.0548183	0.0146785	1	0.892412	1.09212	0.816473	0.843698	0.779934	0.524989	1	0.957973	1.09186	0.985489	1.04671	0.872714	0.790365	1	1.08641	1.03806	0.959611	1.09046	1.04912	0.843938
AT1G57770.1	61724	| FAD/NAD(P)-binding oxidoreductase family protein | Chr1:21395254-21398135 FORWARD LENGTH=574 | 201606	18	18	0.00507351	0.0225079	0.419758	1	1.78156	0.958216	1.07112	1.29481	1.38995	0.727187	1	0.633697	0.823175	1.0577	0.921218	1.31412	1.58389	1	0.935628	1.1454	1.02867	0.735073	1.224	1.04667
AT1G58080.1	44556	| ATP phosphoribosyl transferase 1 | Chr1:21504562-21507429 REVERSE LENGTH=411 | 201606	12	9	0.00016957	0.00256398	0.00155092	1	0.397893	0.610198	0.668004	0.716636	0.147355	0.46253	1	0.894874	0.877917	0.870186	0.755019	0.307933	0.381806	1	0.758178	0.46505	0.6868	0.656702	0.184205	0.337523
AT1G58270.1	45036	| TRAF-like family protein | Chr1:21612394-21614089 REVERSE LENGTH=396 | 201606	8	8	0.0588739	0.00227856	0.00354192	1	0.769691	1.02503	1.09266	0.988644	1.20926	1.4807	1	0.760235	1.45119	1.02059	0.571542	1.86571	1.53151	1	1.02201	1.46482	1.05639	1.28135	1.59131	2.29371
AT1G58290.1	59515	| Glutamyl-tRNA reductase family protein | Chr1:21624028-21626051 REVERSE LENGTH=543 | 201606	12	12	6.34894e-08	1.39744e-08	2.06995e-10	1	0.4703	0.3916	0.626125	0.465986	0.0563562	0.169215	1	0.35597	0.271566	0.201836	0.0764692	0.0396088	0.0154775	1	0.227647	0.0565819	0.149655	0.17782	0.0354275	0.0910806
AT1G58360.1	52895	| amino acid permease 1 | Chr1:21676623-21680313 FORWARD LENGTH=485 | 201606	2	2	0.0437894	0.00175436	0.241984	1	1.20806	1.95408	1.2133	1.36568	3.13872	0.1229	1	0.0470074	0.431426	1.13842	0.68797	0.685882	0.542232	1	2.31194	2.68198	3.14463	3.03713	3.73397	1.37558
AT1G58380.1	30741	| Ribosomal protein S5 family protein | Chr1:21689115-21690085 FORWARD LENGTH=284 | 201606	24	8	8.85348e-05	0.0032408	0.0079164	1	1.02026	1.0216	1.01809	0.92036	0.739547	0.382136	1	0.815344	1.10251	0.671181	0.856602	0.792546	0.716402	1	1.25339	1.09329	0.910917	0.955342	0.868204	0.811334
AT1G59580.1	43125	| mitogen-activated protein kinase homolog 2 | Chr1:21884521-21885743 FORWARD LENGTH=376 | 201606	4	1	0.036854	8.30495e-05	0.00260511	1	0.887847	8.88211	17.5788	0.99196	0.862579	0.903238	1	0.921884	14.2255	25.0404	0.825627	0.806983	0.793008	1	0.965456	22.0487	6.51391	0.903506	0.869703	0.928317
AT1G59610.1	100228	| dynamin-like 3 | Chr1:21893413-21900780 FORWARD LENGTH=920 | 201606	39	20	0.167927	0.857782	0.6642	1	0.994602	0.770129	1.046	1.10545	0.951111	0.816163	1	1.0339	0.978468	1.1076	1.13445	0.884491	0.976231	1	1.06573	0.881546	0.88666	0.996097	1.03587	0.953177
AT1G59700.1	26506	| glutathione S-transferase TAU 16 | Chr1:21936459-21937763 FORWARD LENGTH=234 | 201606	12	12	0.00511748	9.28348e-05	0.138773	1	1.40496	1.12075	1.25169	1.56391	2.13042	1.22016	1	1.5962	1.4299	1.78685	2.02928	2.35576	2.22833	1	0.784948	1.09352	1.38631	1.26063	1.61838	1.65392
AT1G59830.1	34961	| protein phosphatase 2A-2 | Chr1:22020708-22022293 REVERSE LENGTH=306 | 201606	8	2	4.86449e-06	0.000174717	0.000979355	1	0.887847	60.7115	59.3431	75.3783	57.2363	33.1286	1	0.921884	42.2699	55.7467	69.5391	77.928	47.4805	1	0.965456	50.6791	44.1505	57.2666	54.5875	58.7845
AT1G59830.2	30002	| protein phosphatase 2A-2 | Chr1:22020929-22022293 REVERSE LENGTH=262 | 201606	7	3	1.81201e-11	9.58839e-10	2.67085e-06	1	0.887847	60.7115	0.891703	0.99196	0.862579	0.903238	1	0.921884	42.2699	0.838015	0.825627	0.806983	0.793008	1	0.965456	50.6791	0.948178	0.903506	0.869703	0.928317
AT1G59840.1	32222	| cofactor assembly of complex C | Chr1:22026569-22028174 FORWARD LENGTH=297 | 201606	5	5	0.0195026	0.405372	0.0832417	1	1.19264	0.884065	0.0449885	0.0500467	0.479087	0.0455705	1	0.192453	0.426746	0.0422673	0.162033	1.11414	0.409239	1	0.28599	1.85588	0.0702528	0.685062	0.655817	0.27372
AT1G59840.3	30671	| cofactor assembly of complex C | Chr1:22026569-22028174 FORWARD LENGTH=283 | 201606	4	4	0.0137535	0.408168	0.0146277	1	23.6389	17.5228	0.891703	0.99196	9.49583	0.903238	1	3.81568	8.46091	0.838015	3.21255	22.0896	8.11381	1	3.85991	25.0482	0.948178	9.24605	8.85134	3.69431
AT1G59870.1	165081	| ABC-2 and Plant PDR ABC-type transporter family protein | Chr1:22034661-22039844 FORWARD LENGTH=1469 | 201606	93	66	3.78405e-06	0.020182	0.183767	1	1.42311	1.41983	0.982153	1.17425	1.35577	0.508846	1	0.948761	1.13545	1.07491	1.30858	1.59602	1.42089	1	1.23804	1.43665	1.41791	1.10603	1.44863	1.07778
AT1G59900.1	43059	| pyruvate dehydrogenase complex E1 alpha subunit | Chr1:22051368-22053660 FORWARD LENGTH=389 | 201606	31	23	0.00194482	0.0035184	0.00049172	1	0.979184	0.968939	1.27121	1.48386	1.5621	1.66252	1	1.10651	0.762947	1.09876	1.19133	1.22669	1.41433	1	1.20672	1.04033	1.13553	1.15115	1.42412	1.43964
AT1G59960.1	36730	| NAD(P)-linked oxidoreductase superfamily protein | Chr1:22071410-22073067 REVERSE LENGTH=326 | 201606	6	6	0.0792959	0.0197712	0.0509285	1	0.874748	1.34884	1.01126	1.81521	0.870144	0.267366	1	0.278282	1.20934	1.4342	1.61833	0.690358	0.895204	1	0.843831	0.611283	1.06409	0.449813	0.760092	1.15677
AT1G59990.1	64747	| DEA(D/H)-box RNA helicase family protein | Chr1:22090369-22092885 REVERSE LENGTH=581 | 201606	4	4	0.037286	0.00120234	0.0154952	1	1.56777	1.24385	1.28395	0.873164	0.386173	0.608685	1	0.9877	1.33032	0.829026	0.817685	0.464042	0.267841	1	0.595533	0.361406	0.954707	0.698835	0.204984	0.365633
AT1G59990.2	63100	| DEA(D/H)-box RNA helicase family protein | Chr1:22090484-22092885 REVERSE LENGTH=567 | 201606	4	4	0.000663549	4.20011e-06	0.000658175	1	1.56777	0.0287985	0.0296224	0.0329529	0.386173	0.608685	1	0.9877	0.0209488	0.0207488	0.0204421	0.464042	0.267841	1	0.595533	0.0223948	0.0219585	0.0209239	0.204984	0.365633
AT1G60000.1	28498	| RNA-binding (RRM/RBD/RNP motifs) family protein | Chr1:22093678-22094540 REVERSE LENGTH=258 | 201606	2	2	0.0106374	0.484872	0.0388992	1	0.715767	1.04873	0.901428	1.58518	0.366112	0.544735	1	0.726239	0.194168	0.66007	0.641062	0.332048	0.342936	1	0.289093	0.177161	0.404096	0.394049	0.147553	0.27775
AT1G60070.1	94670	| Adaptor protein complex AP-1%2C gamma subunit | Chr1:22142944-22149296 REVERSE LENGTH=862 | 201606	7	5	0.0129322	0.149274	0.140685	1	2.08164	1.30144	1.3259	1.46397	0.171032	0.0451997	1	0.263016	0.913293	0.914515	0.818018	0.513376	0.646257	1	0.875228	1.04321	1.42187	0.635548	0.695643	0.567055
AT1G60140.1	97324	| trehalose phosphate synthase | Chr1:22177246-22180073 REVERSE LENGTH=861 | 201606	3	1	0.000727201	0.235461	0.000810085	1	0.887847	6.03597	11.8987	9.9196	11.4355	0.903238	1	0.921884	8.78035	8.69904	16.1442	10.9453	13.39	1	0.965456	16.2141	12.7794	9.24605	23.2105	9.28317
AT1G60170.1	52645	| pre-mRNA processing ribonucleoprotein binding region-containing protein | Chr1:22193008-22195177 FORWARD LENGTH=485 | 201606	4	4	0.424194	0.00207809	0.000916375	1	0.898269	1.08623	0.0653233	1.21888	0.849982	0.681492	1	2.45336	11.9379	0.22009	4.22202	2.87464	2.87565	1	8.98117	4.2995	0.240587	3.07171	4.41349	0.235547
AT1G60200.1	101497	| splicing factor PWI domain-containing protein / RNA recognition motif (RRM)-containing protein | Chr1:22200882-22205241 REVERSE LENGTH=899 | 201606	2	2	0.00474697	0.167376	0.428521	1	1.34121	1.09074	0.466316	0.0749245	0.863743	0.908334	1	1.33082	2.44282	1.20975	2.00088	2.72455	1.88744	1	0.971788	1.3581	1.8308	2.16258	2.91242	2.66645
AT1G60420.1	65170	| DC1 domain-containing protein | Chr1:22261978-22264243 FORWARD LENGTH=578 | 201606	16	16	0.107883	0.0174627	0.000146663	1	1.23077	1.13488	0.959007	1.45235	1.51839	2.09061	1	1.31522	1.71467	2.60753	2.73073	2.50169	2.7307	1	1.65738	1.99005	2.23489	1.41305	3.10654	1.9267
AT1G60550.1	37056	| enoyl-CoA hydratase/isomerase D | Chr1:22305988-22308092 REVERSE LENGTH=337 | 201606	9	9	0.00557852	0.000117578	0.00186776	1	0.701235	1.18527	1.15605	0.933588	0.0186614	1.23792	1	0.68113	0.626524	0.71027	0.400936	0.13199	0.0126141	1	1.31584	0.602714	0.812627	0.905089	0.186889	0.466996
AT1G60660.1	13709	| cytochrome B5-like protein | Chr1:22342589-22342954 REVERSE LENGTH=121 | 201606	2	2	1.34425e-05	0.0894334	0.00253655	1	0.267972	0.257741	0.0380764	0.0423575	0.0368328	0.38569	1	1.79175	0.0828276	0.082037	0.0808243	0.0789992	0.315858	1	0.287279	0.485224	0.0709966	0.0676516	0.0651206	0.695094
AT1G60690.1	38161	| NAD(P)-linked oxidoreductase superfamily protein | Chr1:22349892-22351668 REVERSE LENGTH=345 | 201606	7	3	0.0111173	0.00542101	0.236332	1	1.61216	1.10093	0.649169	1.33551	0.708494	1.06568	1	1.65191	1.0459	1.882	1.27382	1.53441	2.12991	1	0.681713	0.623008	0.793856	0.956313	0.615395	1.09213
AT1G60710.1	37925	| NAD(P)-linked oxidoreductase superfamily protein | Chr1:22355073-22356627 REVERSE LENGTH=345 | 201606	22	17	0.0473215	0.377963	0.0595858	1	0.939483	0.904215	0.836431	0.732574	0.680293	0.929078	1	1.18537	1.04227	1.14173	1.20957	1.0681	1.28506	1	0.910896	0.744224	0.813624	1.01866	0.797319	0.836981
AT1G60730.1	37857	| NAD(P)-linked oxidoreductase superfamily protein | Chr1:22358327-22360082 REVERSE LENGTH=345 | 201606	12	8	0.00135837	4.23501e-06	4.4005e-06	1	44.5945	31.7788	23.5422	32.773	54.7611	36.1617	1	40.0907	42.4905	58.4235	119.65	77.9193	139.811	1	35.4022	56.9317	82.1885	120.675	101.329	105.154
AT1G60730.3	40128	| NAD(P)-linked oxidoreductase superfamily protein | Chr1:22358327-22360082 REVERSE LENGTH=365 | 201606	6	2	2.16824e-06	1.82813e-10	4.68418e-11	1	44.5945	0.866903	0.891703	0.99196	0.862579	0.903238	1	40.0907	0.846091	0.838015	0.825627	0.806983	0.793008	1	35.4022	0.967021	0.948178	0.903506	0.869703	0.928317
AT1G60750.1	36352	| NAD(P)-linked oxidoreductase superfamily protein | Chr1:22362293-22363854 REVERSE LENGTH=330 | 201606	5	1	5.90898e-05	2.04082e-09	2.82917e-08	1	0.887847	0.866903	0.891703	0.99196	23.2055	0.903238	1	0.921884	0.846091	0.838015	0.825627	40.3944	0.793008	1	0.965456	0.967021	0.948178	0.903506	34.8323	0.928317
AT1G60780.1	49032	| Clathrin adaptor complexes medium subunit family protein | Chr1:22369289-22371885 REVERSE LENGTH=428 | 201606	11	11	0.0653852	0.368537	0.000398698	1	1.32337	1.132	0.768018	0.920107	1.00231	0.437805	1	0.876176	0.963063	0.665755	0.989697	0.789955	0.657498	1	1.25923	1.82117	1.36082	1.09869	1.39795	0.888759
AT1G60810.1	46760	| ATP-citrate lyase A-2 | Chr1:22388691-22390993 REVERSE LENGTH=423 | 201606	8	1	1.16559e-11	2.07824e-13	9.28029e-12	1	62.1426	0.866903	0.891703	0.99196	0.862579	0.903238	1	64.3037	0.846091	0.838015	0.825627	0.806983	0.793008	1	73.9624	0.967021	0.948178	0.903506	0.869703	0.928317
AT1G60900.1	66316	| U2 snRNP auxilliary factor%2C large subunit%2C splicing factor | Chr1:22424008-22427806 FORWARD LENGTH=589 | 201606	4	4	0.0803388	0.550484	0.00441956	1	5.14153	0.212638	4.37443	0.949892	0.831839	5.23344	1	0.908135	0.12148	2.04813	1.908	1.91891	1.16496	1	0.240178	0.240568	0.915764	3.01162	3.5858	6.16785
AT1G60940.1	41040	| SNF1-related protein kinase 2.10 | Chr1:22439398-22441896 REVERSE LENGTH=361 | 201606	13	4	1.82161e-05	0.0426216	0.168579	1	2.55198	2.92268	2.22712	1.48841	3.22832	1.35334	1	1.31488	1.63185	1.56614	0.842725	1.80986	2.11298	1	2.15538	1.15782	0.961375	1.25889	1.94832	1.57249
AT1G60950.1	15539	| 2Fe-2S ferredoxin-like superfamily protein | Chr1:22444565-22445011 FORWARD LENGTH=148 | 201606	14	11	0.0522732	0.00817888	0.254508	1	3.837	2.58348	2.78562	3.62573	3.22947	4.48745	1	2.17488	1.41366	1.77818	1.23663	1.7421	1.85199	1	1.31126	1.0922	1.13278	1.14809	1.15085	0.84903
AT1G60990.1	47009	| Glycine cleavage T-protein family | Chr1:22462771-22465416 REVERSE LENGTH=432 | 201606	8	8	0.0991264	0.093375	0.00562184	1	0.889222	1.08802	1.33727	1.07848	0.5093	1.51651	1	1.29253	0.530975	0.785485	0.510581	0.752807	0.556601	1	1.92342	1.07383	0.948566	1.16886	0.521102	0.648031
AT1G61150.1	27786	| LisH and RanBPM domains containing protein | Chr1:22542928-22544355 FORWARD LENGTH=243 | 201606	3	3	0.0320171	0.293008	0.325525	1	3.0311	2.29526	4.55472	5.89542	1.58371	4.6105	1	0.213716	0.657722	0.976881	0.477286	0.643232	0.189615	1	0.0577008	0.764788	0.929652	0.718646	0.711534	0.575939
AT1G61250.1	32613	| secretory carrier 3 | Chr1:22586035-22588664 FORWARD LENGTH=289 | 201606	3	3	0.0182479	0.0220002	0.082178	1	1.92185	2.6015	0.587699	1.4816	2.0157	0.449695	1	0.576612	1.04989	1.03262	2.16095	1.31085	1.18486	1	0.756332	2.63491	1.68133	1.71761	1.92776	0.728149
AT1G61520.1	29181	| PSI type III chlorophyll a/b-binding protein | Chr1:22700152-22701149 FORWARD LENGTH=273 | 201606	36	36	0.00570772	0.0226203	0.00747498	1	1.0878	0.941898	1.12616	1.05054	0.935248	0.870955	1	1.16436	0.843736	1.02913	0.805023	0.969133	0.990997	1	1.02671	1.11307	1.06909	0.816074	0.728119	0.91237
AT1G61580.1	44546	| R-protein L3 B | Chr1:22720833-22722402 REVERSE LENGTH=390 | 201606	10	1	8.0041e-07	3.02389e-10	8.97478e-06	1	0.677365	0.00793265	0.462899	0.009077	0.00789309	0.00826515	1	0.645245	0.00940101	0.834959	0.00917364	0.00896648	0.0088112	1	1.365	0.0170916	1.21881	0.015969	0.0153715	0.0164075
AT1G61790.1	38806	| Oligosaccharyltransferase complex/magnesium transporter family protein | Chr1:22814390-22815430 FORWARD LENGTH=346 | 201606	10	10	0.0136034	0.00774397	0.371213	1	0.957963	0.645158	0.433945	0.516199	0.737395	0.303113	1	0.558383	0.389404	0.474558	0.895385	0.886576	0.505765	1	0.919881	1.09974	1.29681	1.11778	1.03115	0.751553
AT1G61900.1	47028	| hypothetical protein | Chr1:22882508-22884722 REVERSE LENGTH=433 | 201606	3	3	0.0206787	0.878621	0.0555697	1	23.6456	23.0815	23.6366	9.99325	6.51885	18.0846	1	1.78379	1.28317	1.69572	0.838066	1.224	1.99873	1	5.71544	4.02404	4.87796	0.911915	0.220675	2.35547
AT1G61900.2	45091	| hypothetical protein | Chr1:22882561-22884722 REVERSE LENGTH=413 | 201606	4	4	0.00316828	0.489277	0.0356293	1	23.6456	23.0815	23.6366	0.99196	6.51885	18.0846	1	1.78379	1.28317	1.69572	0.120658	1.224	1.99873	1	5.71544	4.02404	4.87796	0.229252	0.220675	2.35547
AT1G62020.1	136566	| Coatomer%2C alpha subunit | Chr1:22919814-22923728 FORWARD LENGTH=1216 | 201606	57	19	7.64941e-06	0.0156566	0.0728041	1	1.19959	1.02106	0.901312	0.838728	0.804595	0.20612	1	0.89183	0.934138	0.839826	1.19563	1.0064	0.790624	1	1.09312	1.0166	1.05612	0.990809	1.04968	0.706706
AT1G62180.1	50656	| 5'adenylylphosphosulfate reductase 2 | Chr1:22975794-22977465 REVERSE LENGTH=454 | 201606	12	8	6.48071e-05	1.2783e-06	2.12341e-06	1	1.35065	0.488808	1.42723	1.63217	0.372422	0.981565	1	1.75659	0.132051	0.672487	0.935824	0.324279	0.59038	1	0.593763	0.071	0.279632	0.412083	0.139382	0.253712
AT1G62180.2	49927	| 5'adenylylphosphosulfate reductase 2 | Chr1:22975794-22977465 REVERSE LENGTH=447 | 201606	9	5	1.10447e-06	0.0543184	0.0686809	1	0.887847	37.4711	0.891703	0.99196	0.862579	0.903238	1	0.921884	8.78035	0.838015	0.825627	0.806983	0.793008	1	0.965456	10.4009	0.948178	0.903506	0.869703	0.928317
AT1G62380.1	36183	| ACC oxidase 2 | Chr1:23082340-23084068 FORWARD LENGTH=320 | 201606	11	10	0.00117346	0.000588854	0.000669981	1	2.31609	1.5602	1.60683	1.60171	1.19102	1.4157	1	1.38386	1.07059	0.956982	0.72836	0.446187	0.645387	1	2.09748	1.2977	1.0655	1.2284	0.905435	0.71447
AT1G62390.1	82708	| Octicosapeptide/Phox/Bem1p (PB1) domain-containing protein / tetratricopeptide repeat (TPR)-containing protein | Chr1:23084632-23086887 REVERSE LENGTH=751 | 201606	20	20	0.0732474	0.0324169	0.013298	1	0.884093	0.968765	1.29944	0.97009	0.742822	1.2591	1	0.820883	1.07577	0.807892	0.925896	0.793463	0.590443	1	0.964861	0.768526	1.03963	1.37834	0.762374	1.18413
AT1G62430.1	48660	| CDP-diacylglycerol synthase 1 | Chr1:23106274-23108923 REVERSE LENGTH=421 | 201606	2	2	0.0264965	0.430772	0.550315	1	1.07385	1.04718	0.711906	1.293	0.784478	0.454469	1	0.897207	0.953861	0.945018	1.05131	1.59218	1.0091	1	0.772195	1.14259	0.753448	0.898781	1.04527	0.74057
AT1G62480.1	16628	| Vacuolar calcium-binding protein-like protein | Chr1:23128799-23129548 FORWARD LENGTH=152 | 201606	5	5	0.00136184	0.40155	0.0337807	1	2.36767	0.983777	1.18786	0.722573	0.750331	1.57119	1	1.55209	0.943532	1.50197	1.27159	0.989831	0.981257	1	1.30088	0.713678	1.10401	0.626999	1.20748	0.888862
AT1G62560.1	52688	| flavin-monooxygenase glucosinolate S-oxygenase 3 | Chr1:23159912-23162551 FORWARD LENGTH=462 | 201606	4	3	0.0925182	0.0091262	3.00416e-05	1	0.125323	0.122366	0.125867	0.140018	1.23597	0.890583	1	0.0921884	0.0846091	0.328079	0.858308	1.60987	2.10547	1	0.0290019	0.0290489	0.117636	0.188386	0.0261255	0.111435
AT1G62640.1	42847	| 3-ketoacyl-acyl carrier protein synthase III | Chr1:23192502-23194737 FORWARD LENGTH=404 | 201606	14	14	0.177105	0.0102576	0.661603	1	0.821371	0.951222	0.976452	1.10792	0.883694	0.810878	1	0.860205	0.841227	0.956362	1.38975	0.87306	0.939244	1	1.26577	1.32945	1.2189	1.18829	1.02077	1.04265
AT1G62660.1	72228	| Glycosyl hydrolases family 32 protein | Chr1:23199949-23203515 FORWARD LENGTH=648 | 201606	13	8	0.0901269	0.0320728	2.06083e-06	1	1.01034	0.715977	0.825101	1.25479	0.923649	0.995762	1	1.1802	1.27433	1.38867	1.67957	1.40527	2.14012	1	0.545941	0.473935	1.30569	1.38782	1.77432	1.42725
AT1G62660.2	60969	| Glycosyl hydrolases family 32 protein | Chr1:23200579-23203515 FORWARD LENGTH=550 | 201606	12	7	2.70221e-05	0.000145915	1.75853e-07	1	1.01034	0.715977	0.825101	1.25479	0.00891457	0.995762	1	1.1802	1.27433	1.38867	1.67957	0.0111133	2.14012	1	0.545941	0.473935	1.30569	1.38782	0.00818021	1.42725
AT1G62740.1	64520	| stress-inducible protein | Chr1:23231026-23233380 FORWARD LENGTH=571 | 201606	21	18	1.96274e-05	0.000265859	0.87266	1	1.18312	1.13269	1.28832	0.907425	0.935503	1.85806	1	1.25605	1.72923	1.60888	1.94087	1.36081	1.54749	1	0.949729	0.7901	0.88005	0.835937	0.955652	0.896182
AT1G62750.1	86058	| Translation elongation factor EFG/EF2 protein | Chr1:23233622-23236321 REVERSE LENGTH=783 | 201606	87	82	4.83016e-05	2.45573e-08	2.04868e-08	1	0.761057	0.76939	0.874594	0.893173	0.614937	0.672577	1	0.862771	0.669814	0.636291	0.47707	0.469977	0.492811	1	0.705584	0.580372	0.538552	0.579327	0.45888	0.591793
AT1G62760.1	32354	| Plant invertase/pectin methylesterase inhibitor superfamily protein | Chr1:23237574-23238512 REVERSE LENGTH=312 | 201606	1	1	1.91932e-05	1.06485e-14	0.002128	1	0.887847	0.866903	0.891703	0.99196	0.862579	0.903238	1	0.921884	0.846091	0.838015	24.7688	0.806983	0.793008	1	0.965456	0.967021	0.948178	0.903506	25.8921	0.928317
AT1G62780.1	27219	| dimethylallyl%2C adenosine tRNA methylthiotransferase | Chr1:23249349-23251066 REVERSE LENGTH=237 | 201606	16	16	0.000274272	8.46286e-05	6.49029e-06	1	0.940189	1.01665	0.756055	0.761936	0.343221	1.04163	1	0.746713	0.631106	0.359901	0.373499	0.281293	0.2995	1	0.711181	0.276148	0.388772	0.724182	0.241667	0.365618
AT1G62810.1	80138	| Copper amine oxidase family protein | Chr1:23258253-23261772 REVERSE LENGTH=712 | 201606	6	6	0.000318214	1.12772e-05	9.01308e-05	1	0.887847	0.866903	0.891703	0.99196	31.3295	9.03238	1	0.921884	0.846091	16.6228	22.0482	16.1806	47.6621	1	0.965456	0.967021	12.6981	9.24605	54.8638	12.3735
AT1G62820.1	16579	| Calcium-binding EF-hand family protein | Chr1:23263822-23264268 REVERSE LENGTH=148 | 201606	7	3	0.791822	0.820441	0.583864	1	1.47718	2.03163	1.32184	1.46401	1.00149	1.36233	1	1.05107	0.977389	1.39493	0.958152	1.0391	1.53892	1	0.837728	1.59762	1.46586	1.41774	0.871812	0.531785
AT1G63000.1	33597	| nucleotide-rhamnose synthase/epimerase-reductase | Chr1:23342510-23343859 FORWARD LENGTH=301 | 201606	17	15	0.0286167	0.00906464	0.1197	1	0.978009	0.976993	0.842812	0.990475	0.686989	1.38999	1	1.07426	1.23258	0.842688	1.10328	0.636148	0.889013	1	0.827805	0.98937	1.00992	0.75633	0.602689	0.815812
AT1G63010.5	79273	| Major Facilitator Superfamily with SPX (SYG1/Pho81/XPR1) domain-containing protein | Chr1:23347972-23351026 REVERSE LENGTH=708 | 201606	4	4	0.466613	0.0763997	0.536861	1	1.71376	2.0584	0.124627	0.546738	1.24895	0.126239	1	0.945617	0.818808	0.20768	2.76794	5.31206	0.196526	1	0.36842	2.62264	0.351357	1.43304	1.37157	0.088606
AT1G63220.1	16266	| Calcium-dependent lipid-binding (CaLB domain) family protein | Chr1:23449017-23450244 FORWARD LENGTH=147 | 201606	4	4	0.000140046	0.0181301	0.000388481	1	0.887847	0.866903	17.9004	0.99196	0.862579	15.0515	1	0.921884	0.846091	14.4925	19.0962	0.806983	7.93008	1	0.965456	0.967021	12.6293	18.1516	0.869703	15.493
AT1G63500.1	54798	| kinase with tetratricopeptide repeat domain-containing protein | Chr1:23556015-23558403 FORWARD LENGTH=487 | 201606	11	6	0.154767	0.07388	0.424718	1	1.59668	1.03816	1.48332	1.24436	1.60948	1.20052	1	1.62538	1.07166	1.55824	1.86194	1.90919	2.02012	1	0.63361	0.7327	0.879531	0.843298	0.691908	0.962232
AT1G63610.1	37956	| hypothetical protein | Chr1:23583675-23585599 REVERSE LENGTH=340 | 201606	8	8	0.000341316	0.00536224	0.49082	1	0.746667	0.909861	0.467511	0.308328	0.448438	0.236666	1	0.920404	1.02111	0.557857	0.541153	0.805723	0.371289	1	0.608957	0.524241	0.241591	0.565296	0.543313	0.408219
AT1G63660.1	59315	| GMP synthase (glutamine-hydrolyzing)%2C putative / glutamine amidotransferase | Chr1:23604127-23607080 REVERSE LENGTH=534 | 201606	14	14	0.0139179	0.00614584	0.00185817	1	1.04847	1.2614	1.14237	0.949899	0.898015	0.410279	1	0.515038	0.939116	0.989257	0.97681	0.718756	0.468287	1	1.20774	0.954959	1.22845	1.35766	0.832566	0.736068
AT1G63680.1	85587	| ALBINO OR PALE-GREEN 13 | Chr1:23614461-23617247 FORWARD LENGTH=772 | 201606	6	6	0.0110792	0.00629368	0.00476934	1	9.78544	9.57573	11.3555	4.1683	5.81342	13.0733	1	39.6051	53.5437	22.1887	19.0962	40.1768	23.7403	1	5.2825	1.49453	3.38325	4.08384	2.53303	2.39055
AT1G63770.5	109406	| Peptidase M1 family protein | Chr1:23657791-23664243 REVERSE LENGTH=975 | 201606	82	48	0.023512	0.456366	0.00764763	1	1.02891	0.870727	1.01791	1.04883	1.22905	1.02815	1	1.00692	0.975172	0.932414	1.06681	0.963862	1.07859	1	0.986634	0.970821	1.0096	1.07574	1.23264	0.9797
AT1G63770.7	99159	| Peptidase M1 family protein | Chr1:23657791-23663476 REVERSE LENGTH=883 | 201606	81	1	1.0022e-12	2.2395e-13	4.23211e-15	1	0.00131101	0.862237	0.994368	0.00146475	0.0012737	0.00133374	1	0.00125527	0.999924	0.941278	0.0011242	0.00109881	0.00107978	1	0.00119308	0.963089	1.00963	0.00111652	0.00107475	0.00114718
AT1G63830.1	25667	| PLAC8 family protein | Chr1:23685408-23687098 FORWARD LENGTH=232 | 201606	3	3	0.00813962	0.0289087	0.00115907	1	1.57875	2.21402	1.592	0.989042	7.41197	6.93183	1	3.63662	8.46091	19.6847	27.1895	40.7392	52.8566	1	1.84529	0.930962	4.03304	1.72534	9.10578	7.54033
AT1G63830.5	20251	| PLAC8 family protein | Chr1:23685804-23687098 FORWARD LENGTH=184 | 201606	2	2	0.151775	0.0751264	0.00403337	1	1.57875	2.21402	1.592	0.989042	0.220298	0.230682	1	3.63662	8.46091	19.6847	27.1895	0.806983	0.793008	1	1.84529	0.930962	4.03304	1.72534	0.124942	0.133362
AT1G63940.1	52502	| monodehydroascorbate reductase 6 | Chr1:23730206-23733534 FORWARD LENGTH=486 | 201606	54	54	0.0114723	0.00102537	0.0493891	1	1.23186	1.32129	1.30779	1.22298	1.16926	1.43819	1	1.60236	1.5158	1.65105	1.37349	1.32636	1.56888	1	1.29287	1.02695	1.21125	1.16019	1.08631	1.1197
AT1G63970.1	24812	| isoprenoid F | Chr1:23738923-23740336 REVERSE LENGTH=231 | 201606	21	21	0.00268988	0.0343291	0.0235844	1	1.20302	0.989329	1.01993	0.676246	0.89666	1.17432	1	1.02987	1.26657	0.827212	0.665387	1.0184	0.844289	1	0.858891	0.758432	0.643773	0.837385	0.742103	0.859777
AT1G64040.1	36215	| type one serine/threonine protein phosphatase 3 | Chr1:23758626-23760274 REVERSE LENGTH=322 | 201606	3	2	0.133675	0.00580576	0.00896011	1	1.54397	0.866961	3.66592	0.247519	2.1849	3.00076	1	0.0872604	0.325626	0.793218	0.768743	2.28766	0.750617	1	1.71528	3.21477	3.24259	3.80955	6.59499	7.07073
AT1G64090.1	28696	| Reticulan like protein B3 | Chr1:23789395-23790669 FORWARD LENGTH=255 | 201606	5	4	0.0455981	0.0682954	0.00548015	1	0.885631	0.47705	0.580712	0.637341	0.956088	0.452408	1	0.617012	0.478916	0.556063	0.804185	0.926525	0.49273	1	0.882336	0.492815	0.574899	0.786227	0.529231	0.525164
AT1G64190.1	53378	| 6-phosphogluconate dehydrogenase family protein | Chr1:23825549-23827012 REVERSE LENGTH=487 | 201606	35	13	0.0124545	6.71145e-05	0.000681558	1	1.09131	1.19726	1.33165	1.5215	1.50069	1.3776	1	1.34194	1.05799	1.30026	1.46623	1.55972	1.55624	1	1.41081	1.24398	1.40249	1.15576	1.56549	1.63166
AT1G64200.1	27085	| vacuolar H+-ATPase subunit E isoform 3 | Chr1:23828537-23830002 REVERSE LENGTH=237 | 201606	14	4	2.59591e-05	0.0282498	0.0133176	1	1.14851	0.928133	0.97065	1.21215	1.11424	1.51231	1	1.06338	1.05726	1.22132	1.13064	1.3888	1.44071	1	1.05652	1.05728	0.993878	1.14292	1.2231	1.14658
AT1G64230.1	16510	| ubiquitin-conjugating enzyme 28 | Chr1:23833792-23835220 FORWARD LENGTH=148 | 201606	5	1	0.00816093	3.57989e-06	0.0285768	1	1.15413	0.0200964	0.0206713	0.535121	0.0199962	0.0209388	1	1.5868	0.0255466	0.0253027	0.483321	0.0243658	0.0239438	1	1.24787	0.0417558	0.0409422	0.656144	0.0375536	0.0400845
AT1G64330.1	64495	| myosin heavy chain-like protein | Chr1:23872172-23873970 FORWARD LENGTH=555 | 201606	11	9	0.00575759	0.0329432	0.0345227	1	4.4185	2.59906	3.12038	1.94628	3.00136	0.903778	1	1.88764	2.23844	1.35966	1.3392	2.36663	1.15037	1	2.16004	1.92286	1.50021	1.41219	0.876653	0.830141
AT1G64370.1	19697	| filaggrin-like protein | Chr1:23888967-23889503 FORWARD LENGTH=178 | 201606	4	4	0.137143	0.201673	0.147098	1	0.788629	0.679948	0.400383	0.13031	1.06281	1.01361	1	1.82387	3.06115	1.66228	2.40322	3.77468	1.84324	1	1.29028	3.09206	1.89636	1.20245	1.15776	1.24027
AT1G64400.1	74751	| AMP-dependent synthetase and ligase family protein | Chr1:23915802-23919681 REVERSE LENGTH=665 | 201606	14	12	0.00505431	8.06408e-05	0.314655	1	2.53382	2.11306	1.87308	1.65347	3.02301	0.37988	1	1.38136	2.79798	3.20634	2.97863	4.97632	6.20412	1	1.72448	1.66168	1.5491	1.35209	2.11158	1.92248
AT1G64430.1	61622	| Pentatricopeptide repeat (PPR) superfamily protein | Chr1:23933541-23936336 FORWARD LENGTH=559 | 201606	5	5	0.268023	0.0206138	0.717952	1	1.48193	1.74034	1.18375	1.14485	1.27714	0.179868	1	0.816809	1.08769	0.753263	0.623893	1.86151	0.508199	1	0.972361	1.10847	0.634923	0.908454	1.15966	1.39692
AT1G64500.1	41016	| Glutaredoxin family protein | Chr1:23953270-23954376 FORWARD LENGTH=368 | 201606	4	4	0.202184	0.0510333	0.633912	1	1.42444	1.56395	0.983176	1.07763	0.686837	1.35704	1	1.10415	2.55103	2.37231	0.814087	1.94683	1.28354	1	1.45611	1.24653	1.72783	1.06357	1.61134	1.24327
AT1G64510.1	22761	| Translation elongation factor EF1B/ribosomal protein S6 family protein | Chr1:23954993-23956205 REVERSE LENGTH=207 | 201606	7	7	0.0788275	0.00127764	0.0563632	1	1.00736	0.575029	1.12812	1.37974	0.408031	0.719072	1	1.31072	0.655518	0.736128	0.411418	0.178957	0.175319	1	0.964439	0.584172	0.87346	0.623335	0.337892	0.357845
AT1G64520.1	30706	| regulatory particle non-ATPase 12A | Chr1:23956459-23958120 FORWARD LENGTH=267 | 201606	17	17	0.0156945	0.029953	0.0223815	1	0.801543	0.985962	1.05369	1.31257	0.937877	0.942669	1	1.05473	1.12268	1.60953	1.58615	1.09291	1.53649	1	0.989913	0.995107	1.35227	1.14164	0.975513	1.17359
AT1G64550.1	79644	| general control non-repressible 3 | Chr1:23968850-23973369 FORWARD LENGTH=715 | 201606	9	9	0.39058	0.0609908	0.0144664	1	0.832064	1.10456	0.842656	0.938405	0.747686	0.484261	1	1.00281	2.24233	1.38213	1.30547	0.796666	0.692849	1	0.915181	0.449926	0.742838	0.621282	0.54898	0.489221
AT1G64650.1	50658	| Major facilitator superfamily protein | Chr1:24023805-24026336 REVERSE LENGTH=462 | 201606	2	2	1.04803e-05	1.11912e-06	0.00101094	1	0.887847	11.5663	0.891703	0.99196	8.62579	0.903238	1	0.921884	11.1919	0.838015	0.825627	18.8734	0.793008	1	0.965456	6.48029	0.948178	0.903506	11.6771	0.928317
AT1G64650.2	46212	| Major facilitator superfamily protein | Chr1:24023805-24026048 REVERSE LENGTH=421 | 201606	2	2	0.000599969	1.57287e-06	0.00553473	1	0.887847	11.5663	0.891703	6.99966	8.62579	0.903238	1	0.921884	11.1919	0.838015	8.25627	18.8734	0.793008	1	0.965456	6.48029	0.948178	6.35775	11.6771	0.928317
AT1G64680.1	28163	| beta-carotene isomerase D27 | Chr1:24036071-24037062 FORWARD LENGTH=250 | 201606	7	7	0.0767753	0.47562	0.499027	1	1.7089	1.84068	2.07442	2.2232	1.9218	2.64795	1	0.82425	0.688251	0.864834	0.612443	0.905141	0.927162	1	0.879887	0.962852	0.905718	0.822803	0.67626	0.931189
AT1G64710.1	41316	| GroES-like zinc-binding alcohol dehydrogenase family protein | Chr1:24044686-24046313 FORWARD LENGTH=380 | 201606	10	10	0.000498279	5.40599e-06	0.00197597	1	4.13958	1.73381	3.262	3.62039	2.30383	4.51373	1	1.97092	1.07954	1.67983	3.5683	4.25461	5.75109	1	3.26483	4.47684	3.19638	2.17142	2.07582	5.35616
AT1G64710.2	38974	| GroES-like zinc-binding alcohol dehydrogenase family protein | Chr1:24044836-24046313 FORWARD LENGTH=357 | 201606	5	5	3.55335e-21	4.87937e-08	3.17948e-06	1	0.0887847	0.0866903	0.0891703	0.099196	0.0862579	0.0903238	1	0.0394434	0.0362005	0.0358549	0.0353249	0.0345272	0.0339293	1	0.0577008	0.0577944	0.0566682	0.0539984	0.0519781	0.0554812
AT1G64740.1	49800	| alpha-1 tubulin | Chr1:24050114-24052296 FORWARD LENGTH=450 | 201606	28	8	0.0180837	0.00523995	0.139488	1	1.16723	1.00478	1.06605	0.926888	0.660861	1.19843	1	0.97694	0.901232	0.977536	0.663126	0.774057	0.7398	1	1.35565	1.14968	1.39858	0.882716	1.08098	1.47719
AT1G64760.1	52281	| O-Glycosyl hydrolases family 17 protein | Chr1:24054220-24056194 REVERSE LENGTH=481 | 201606	7	6	9.59561e-05	1.69097e-07	3.26616e-06	1	1.41531	1.81584	0.0266827	1.47594	0.864297	1.17032	1	1.26409	1.9495	0.0232115	3.42006	3.05845	3.37692	1	1.76995	2.17168	0.0237045	2.78562	1.96181	1.85779
AT1G64770.1	38006	| NDH-dependent cyclic electron flow 1 | Chr1:24057549-24059415 FORWARD LENGTH=348 | 201606	30	30	0.0937471	0.0185886	0.023164	1	1.11197	1.13169	1.33077	1.17491	1.35945	1.36184	1	1.33023	1.21994	1.14743	0.863298	1.18689	1.11808	1	0.978288	1.08022	0.957951	0.915305	0.64872	0.98138
AT1G64780.1	55014	| ammonium transporter 1%3B2 | Chr1:24061021-24062565 REVERSE LENGTH=514 | 201606	2	2	0.386403	7.65098e-06	0.100035	1	6.1816	6.3717	6.31849	0.99196	8.78561	0.903238	1	0.921884	8.46091	0.838015	3.21255	18.7872	13.2879	1	0.0965456	1.56693	0.368114	0.627126	0.342244	0.954895
AT1G64790.1	284776	| ILITYHIA | Chr1:24065232-24081908 REVERSE LENGTH=2610 | 201606	22	22	0.0027033	0.0464361	0.045005	1	1.05293	0.736436	0.327289	0.427273	0.237739	0.00619887	1	0.573184	0.559279	0.364018	0.667838	0.519208	0.185826	1	0.648463	0.605961	0.537737	0.434276	0.266572	0.0465225
AT1G64850.1	18098	| Calcium-binding EF hand family protein | Chr1:24096548-24097574 REVERSE LENGTH=162 | 201606	2	2	0.000520338	2.44455e-05	0.00315985	1	0.887847	0.866903	0.891703	0.99196	17.4189	18.0771	1	0.921884	0.846091	0.838015	0.825627	16.0535	26.5758	1	0.965456	0.967021	0.948178	0.903506	23.0668	12.6223
AT1G64900.1	58605	| cytochrome P450%2C family 89%2C subfamily A%2C polypeptide 2 | Chr1:24113283-24114803 FORWARD LENGTH=506 | 201606	6	3	0.00185209	1.05767e-05	0.00122116	1	0.467363	1.0886	1.12183	2.00598	3.03719	0.477393	1	0.921884	1.97694	1.94745	4.85957	6.18249	5.0416	1	0.749922	2.83195	2.58877	4.73517	3.66742	1.61425
AT1G64930.1	59004	| cytochrome P450%2C family 87%2C subfamily A%2C polypeptide 7 | Chr1:24120926-24122461 FORWARD LENGTH=511 | 201606	6	1	9.96965e-07	9.26176e-07	1.07509e-08	1	0.887847	0.866903	0.891703	0.99196	25.9068	0.903238	1	0.921884	0.846091	0.838015	0.825627	40.2177	0.793008	1	0.965456	0.967021	0.948178	0.903506	34.6886	0.928317
AT1G64950.1	59116	| cytochrome P450%2C family 89%2C subfamily A%2C polypeptide 5 | Chr1:24127587-24129119 FORWARD LENGTH=510 | 201606	7	2	0.00299669	0.0160505	0.000118964	1	0.896485	0.368338	0.89173	1.1826	2.07431	0.0544735	1	0.912777	1.46094	1.05646	2.79076	3.62083	1.19962	1	0.497261	3.06161	2.01113	2.39924	2.30573	0.183715
AT1G64970.1	38075	| gamma-tocopherol methyltransferase | Chr1:24134337-24135993 REVERSE LENGTH=348 | 201606	11	11	0.00108708	0.000743371	0.00362921	1	1.88641	1.845	2.18458	2.75303	3.67171	2.12039	1	1.17663	1.23507	2.06885	1.91945	3.10081	3.53627	1	1.06603	1.1448	1.38048	1.60822	2.54878	1.36442
AT1G64980.1	30216	| Nucleotide-diphospho-sugar transferases superfamily protein | Chr1:24137840-24138619 REVERSE LENGTH=259 | 201606	9	9	4.27021e-05	0.00128926	0.00298048	1	1.16695	1.41037	1.33734	0.9255	0.117298	1.52518	1	2.26488	1.36721	1.49233	0.738463	0.272301	0.470394	1	1.41237	0.778402	0.949042	0.794465	0.305897	0.544116
AT1G65010.1	152701	| WEB family protein (DUF827) | Chr1:24149543-24154024 FORWARD LENGTH=1345 | 201606	8	8	0.0118365	0.000194898	0.00432872	1	1.48287	0.59189	0.117344	0.0333502	0.0290004	1.21578	1	1.1041	1.73165	0.716735	0.0420992	0.0411485	0.0404359	1	1.85362	0.138923	0.528834	0.129798	0.124942	0.133362
AT1G65220.1	47060	| ARM repeat superfamily protein | Chr1:24226204-24228799 FORWARD LENGTH=411 | 201606	7	3	0.00629946	0.00556859	0.716993	1	0.789117	1.20726	0.678111	1.25323	0.230825	0.240324	1	0.936567	1.10293	0.601593	1.53724	0.700054	0.237745	1	0.846881	0.704846	0.962629	1.13107	0.751606	0.464013
AT1G65230.1	32736	| transmembrane protein%2C putative (DUF2358) | Chr1:24229167-24230764 FORWARD LENGTH=286 | 201606	5	5	0.17307	0.0261794	0.0642002	1	1.5621	2.35934	1.10326	0.982237	1.08788	0.0673957	1	2.30272	1.05682	2.32727	0.758993	1.51637	0.0741096	1	0.963181	0.936456	0.752094	0.637514	0.272897	0.0278862
AT1G65260.1	36392	| plastid transcriptionally active 4 | Chr1:24236329-24240428 FORWARD LENGTH=330 | 201606	36	36	7.03551e-05	0.0410154	0.0788073	1	1.49276	1.32403	1.3855	1.00826	1.26832	1.41199	1	1.28293	1.09436	1.3348	0.963117	1.1027	1.12759	1	1.16815	1.05939	1.03336	1.0234	0.864679	1.02997
AT1G65270.1	32535	| ER membrane protein complex subunit-like protein | Chr1:24241855-24244504 FORWARD LENGTH=292 | 201606	7	7	0.00864179	0.0165235	0.32123	1	1.33548	1.5941	0.899051	1.06525	0.937022	2.04194	1	1.13872	2.04161	0.97258	1.36074	1.06704	1.57357	1	1.48821	1.59639	0.801257	1.11472	1.27516	1.21734
AT1G65290.1	14167	| mitochondrial acyl carrier protein 2 | Chr1:24249088-24250366 REVERSE LENGTH=126 | 201606	4	4	0.162566	0.342078	0.056879	1	1.42492	2.09116	1.23824	0.787618	0.890507	1.98917	1	0.825219	1.29558	1.06157	0.516806	0.729043	1.31004	1	2.89959	1.57961	2.21111	1.50807	2.92149	2.78957
AT1G65350.1	35398	| ubiquitin 13 | Chr1:24272518-24277275 REVERSE LENGTH=319 | 201606	20	1	4.55396e-13	2.5146e-23	8.26166e-16	1	0.887847	0.866903	0.891703	379.038	0.862579	0.903238	1	0.921884	0.846091	0.838015	593.815	0.806983	0.793008	1	0.965456	0.967021	0.948178	652.899	0.869703	0.928317
AT1G65410.1	37518	| non-intrinsic ABC protein 11 | Chr1:24295362-24297332 FORWARD LENGTH=345 | 201606	6	6	0.0749305	0.72025	0.0528509	1	1.93185	1.24655	2.5626	1.41317	1.85487	0.0652392	1	1.36508	1.11916	1.38148	1.44334	1.4671	0.537593	1	1.06847	0.642809	0.840812	0.703139	0.573342	0.216099
AT1G65540.1	83561	| LETM1-like protein | Chr1:24362382-24366011 REVERSE LENGTH=736 | 201606	13	13	0.0624523	0.00018354	3.1971e-05	1	1.21089	1.84306	2.00376	1.96548	2.79221	0.907138	1	1.51154	1.45083	1.82757	2.40131	2.71328	3.23501	1	1.48149	1.44409	2.68513	1.45733	3.26146	2.13582
AT1G65560.1	38631	| Zinc-binding dehydrogenase family protein | Chr1:24371608-24373673 REVERSE LENGTH=350 | 201606	3	2	0.061914	0.0291356	0.827113	1	1.55502	1.08237	1.10825	1.22657	1.93957	1.58078	1	2.44412	0.846091	3.09439	2.17484	2.40824	1.84324	1	0.974505	0.681437	0.687083	1.04449	1.12365	1.07009
AT1G65580.1	121711	| Endonuclease/exonuclease/phosphatase family protein | Chr1:24377598-24383940 REVERSE LENGTH=1101 | 201606	3	3	0.13732	0.00475951	0.0808528	1	0.0887847	0.63717	0.349024	0.099196	0.609706	0.0903238	1	0.921884	22.6517	8.5278	0.825627	16.2258	13.5216	1	0.138312	2.26297	1.89739	0.129437	1.67288	0.529252
AT1G65590.1	60014	| beta-hexosaminidase 3 | Chr1:24385996-24390989 FORWARD LENGTH=535 | 201606	7	7	0.00100936	0.181763	0.00379957	1	2.0736	0.386162	1.09177	1.00024	0.8553	0.119811	1	0.831685	0.307177	0.454449	0.661611	0.878925	0.504713	1	1.44894	0.473877	0.659998	0.813146	0.518831	0.650568
AT1G65650.1	37499	| Peptidase C12%2C ubiquitin carboxyl-terminal hydrolase 1 | Chr1:24415172-24417466 REVERSE LENGTH=330 | 201606	5	5	0.563002	0.411041	0.00667318	1	1.04179	1.59816	0.904534	0.504183	1.32097	0.634577	1	0.695097	0.535061	1.07062	0.612666	0.616824	0.802415	1	0.40402	1.15589	1.69108	1.43642	1.03956	1.2933
AT1G65820.1	16586	| microsomal glutathione s-transferase | Chr1:24485213-24486682 FORWARD LENGTH=146 | 201606	6	6	0.272628	0.00264258	0.00723639	1	0.821341	1.07209	0.547613	0.394375	0.946184	0.418736	1	0.921884	4.20366	4.18007	5.0948	5.64888	4.51215	1	0.976732	3.42761	3.42704	2.91768	5.07395	2.4241
AT1G65820.2	18278	| microsomal glutathione s-transferase | Chr1:24485213-24486682 FORWARD LENGTH=162 | 201606	3	3	0.000797833	7.39667e-17	0.00800244	1	0.821341	0.0201083	0.0206835	0.023009	0.020008	0.0209511	1	0.921884	0.0846091	0.0838015	0.0825627	0.0806983	0.0793008	1	0.976732	0.0584805	0.0573409	0.0546394	0.0525952	0.0561398
AT1G65860.1	52309	| flavin-monooxygenase glucosinolate S-oxygenase 1 | Chr1:24499210-24502678 REVERSE LENGTH=459 | 201606	4	3	0.541229	0.527615	1.19781e-06	1	0.221541	0.216314	0.870904	0.247519	0.215235	0.225381	1	0.221752	0.203521	0.789168	0.198598	0.194114	0.190752	1	0.0321588	0.0322109	0.0315833	0.0300952	0.0289693	0.0309217
AT1G65930.1	45746	| cytosolic NADP+-dependent isocitrate dehydrogenase | Chr1:24539088-24541861 FORWARD LENGTH=410 | 201606	65	55	0.00476944	0.00359691	3.25387e-05	1	0.998147	1.0669	1.09407	1.01024	0.786441	0.955042	1	1.33435	1.24316	1.24562	1.35217	0.92673	1.06228	1	1.33833	1.1724	1.26106	1.10971	1.07407	0.983812
AT1G65960.2	56141	| glutamate decarboxylase 2 | Chr1:24552094-24557253 FORWARD LENGTH=494 | 201606	51	45	4.36357e-05	0.124636	0.000592731	1	1.06242	1.09831	1.08583	1.18125	1.2014	0.512278	1	0.925238	1.03288	1.18281	1.20643	1.13461	0.99001	1	0.936226	1.09411	1.07519	1.06308	0.837095	0.735835
AT1G65970.1	17414	| thioredoxin-dependent peroxidase 2 | Chr1:24557527-24558229 REVERSE LENGTH=162 | 201606	10	8	0.00123461	5.34108e-09	2.53684e-07	1	9.18416	6.1075	6.3775	0.99196	20.0613	27.1095	1	21.4541	25.2314	30.5939	228.387	45.5129	84.2137	1	22.5252	50.3878	85.1467	81.4409	159.67	43.2964
AT1G65980.1	17428	| thioredoxin-dependent peroxidase 1 | Chr1:24559524-24560753 REVERSE LENGTH=162 | 201606	21	19	0.054584	4.17826e-07	3.34884e-06	1	0.780722	0.992934	1.20897	1.20434	1.15206	1.24876	1	1.45064	1.78467	2.08385	3.96261	1.96982	2.83057	1	1.56653	2.02485	2.18045	1.73257	3.26899	2.13315
AT1G66070.1	25507	| Translation initiation factor eIF3 subunit | Chr1:24596194-24597520 REVERSE LENGTH=226 | 201606	8	8	0.0150505	0.0123955	0.806879	1	3.73209	2.84907	1.66622	5.9814	4.04928	4.67273	1	37.0743	25.2661	30.5939	43.8651	26.8571	23.6903	1	1.63146	1.79789	2.24494	1.30438	1.66859	1.34961
AT1G66080.1	21097	| hikeshi-like protein | Chr1:24600356-24601027 REVERSE LENGTH=190 | 201606	1	1	0.0452431	0.0130595	0.0175364	1	1.48648	0.866903	1.4786	0.999325	1.14649	0.0903238	1	0.467071	0.170447	0.29068	0.54542	0.282509	0.396504	1	1.28706	0.967021	1.25184	1.20098	0.601496	0.0928317
AT1G66100.1	14147	| Plant thionin | Chr1:24605876-24606473 REVERSE LENGTH=134 | 201606	4	4	0.000375867	1.07359e-05	0.00196949	1	0.277401	0.444403	0.480245	0.567017	0.294091	0.565358	1	0.694572	0.452282	0.452269	0.201665	0.290128	0.481819	1	0.546925	0.509991	0.568147	0.572891	0.230858	0.496585
AT1G66130.1	40098	| NAD(P)-binding Rossmann-fold superfamily protein | Chr1:24615040-24616742 FORWARD LENGTH=364 | 201606	8	8	0.0134243	0.00246794	0.125643	1	0.79008	0.686636	0.766121	1.02051	0.834131	0.218081	1	0.780508	0.529838	0.554065	0.384883	0.710147	0.599347	1	0.73981	0.807997	0.689464	0.754297	0.724168	0.432273
AT1G66150.1	102388	| transmembrane kinase 1 | Chr1:24631503-24634415 FORWARD LENGTH=942 | 201606	4	3	0.0804893	0.000555367	0.156425	1	1.10633	2.16262	1.11532	1.22985	0.866894	0.269631	1	0.307295	0.378107	0.299977	0.0275209	0.186981	0.0264336	1	0.192885	0.636733	0.0476685	0.0454227	0.172059	0.185727
AT1G66200.1	39207	| hypothetical protein | Chr1:24655520-24657520 REVERSE LENGTH=356 | 201606	54	22	1.78287e-07	9.72697e-11	5.39007e-09	1	1.07654	1.12224	1.18386	1.09858	1.43631	0.00132552	1	1.18468	1.40055	1.60944	1.99129	1.82215	0.00123437	1	1.19586	1.45482	1.4895	1.44811	1.97539	0.00124575
AT1G66200.3	40390	| hypothetical protein | Chr1:24655520-24657520 REVERSE LENGTH=365 | 201606	58	1	1.68919e-11	1.95176e-18	8.87789e-12	1	0.887847	0.866903	0.891703	0.99196	0.862579	930.644	1	0.921884	0.846091	0.838015	0.825627	0.806983	1098.42	1	0.965456	0.967021	0.948178	0.903506	0.869703	1092.46
AT1G66240.1	11430	| homolog of anti-oxidant 1 | Chr1:24686445-24687327 REVERSE LENGTH=106 | 201606	11	11	0.139675	0.055296	0.0168028	1	1.15275	0.958284	0.986193	1.11382	0.973193	1.19113	1	1.13907	0.880906	1.03929	1.08538	1.08682	1.08719	1	0.84918	0.850674	0.789708	0.646419	0.661579	0.775786
AT1G66260.1	31318	| RNA-binding (RRM/RBD/RNP motifs) family protein | Chr1:24695895-24697883 REVERSE LENGTH=295 | 201606	4	4	0.0132708	0.00904595	0.00959902	1	1.77218	1.72893	1.77293	1.63031	0.858188	0.044932	1	1.85339	1.58498	0.848286	1.14531	0.930857	0.0343003	1	1.28813	1.08517	1.15932	1.20467	1.1725	0.0309439
AT1G66430.1	41471	| pfkB-like carbohydrate kinase family protein | Chr1:24778400-24780393 FORWARD LENGTH=384 | 201606	17	16	0.0673457	1.51927e-05	0.200028	1	1.15271	1.32746	0.978826	0.721712	0.599887	0.994445	1	0.693674	1.04803	0.930252	0.477664	0.549411	0.361581	1	0.740555	0.624716	1.00786	0.8726	0.609717	0.835397
AT1G66520.1	38503	| formyltransferase | Chr1:24816330-24818693 REVERSE LENGTH=355 | 201606	5	5	0.0091223	0.0212073	0.00345516	1	0.326508	0.320679	0.0834055	1.22721	0.556207	3.10124	1	0.0689396	0.64529	0.0626677	0.0617413	1.02263	2.78122	1	0.527304	0.497168	0.128566	0.862066	4.34592	2.09679
AT1G66520.2	35556	| formyltransferase | Chr1:24816563-24818693 REVERSE LENGTH=328 | 201606	5	5	0.000107104	0.0144772	0.000198131	1	3.49075	3.42843	0.891703	0.99196	5.9465	33.1559	1	0.921884	8.62905	0.838015	0.825627	13.6749	37.1915	1	3.88888	3.66662	0.948178	0.903506	32.0513	15.4639
AT1G66530.1	66446	| Arginyl-tRNA synthetase%2C class Ic | Chr1:24819064-24822277 REVERSE LENGTH=590 | 201606	11	4	0.00180662	0.0193614	0.00161487	1	0.754588	0.836622	0.891932	0.917407	0.69967	0.243349	1	0.940604	0.615521	0.813719	1.01897	0.426259	0.513376	1	0.962273	0.699674	1.078	0.527601	0.508069	0.542282
AT1G66580.1	24929	| senescence associated gene 24 | Chr1:24839208-24840439 FORWARD LENGTH=221 | 201606	16	2	0.000498475	0.101033	0.0224735	1	0.508579	0.59038	0.872485	0.77889	0.538818	0.147086	1	0.64072	0.804755	0.651155	1.13075	0.750748	0.596719	1	1.43615	1.38261	1.13121	0.941282	0.805009	0.723484
AT1G66670.1	33925	| CLP protease proteolytic subunit 3 | Chr1:24863995-24865646 REVERSE LENGTH=309 | 201606	13	13	0.0455537	0.443272	0.0597549	1	0.725064	0.672695	0.855967	1.03262	0.925328	1.24063	1	0.691878	0.848495	0.655267	0.652884	0.757998	0.76421	1	0.694079	0.492187	0.53499	0.649804	0.693147	0.739346
AT1G66680.1	39229	| S-adenosyl-L-methionine-dependent methyltransferases superfamily protein | Chr1:24866352-24868888 REVERSE LENGTH=358 | 201606	8	8	0.00940098	0.00257182	0.00100986	1	2.07675	1.92413	1.48146	0.655317	1.62648	2.21302	1	0.937119	1.46755	1.80138	2.65574	1.80522	2.34019	1	1.75143	1.19361	1.80391	2.46012	1.89295	1.68449
AT1G66880.1	144433	| Protein kinase superfamily protein | Chr1:24946928-24955438 FORWARD LENGTH=1296 | 201606	3	3	0.485929	0.551465	6.16134e-06	1	0.887847	0.866903	0.891703	0.99196	3.41777	0.903238	1	0.921884	3.44016	0.838015	5.73466	0.806983	0.793008	1	0.965456	0.967021	9.66144	14.9992	28.9717	0.928317
AT1G66880.3	74967	| Protein kinase superfamily protein | Chr1:24951332-24955438 FORWARD LENGTH=675 | 201606	3	3	0.485929	0.47185	1.99105e-06	1	0.887847	0.866903	0.891703	0.99196	3.41777	0.903238	1	0.921884	3.44016	0.838015	0.825627	0.806983	0.793008	1	0.965456	0.967021	9.66144	0.903506	28.9717	0.928317
AT1G66950.1	165193	| pleiotropic drug resistance 11 | Chr1:24978239-24984461 FORWARD LENGTH=1454 | 201606	6	1	4.07654e-07	0.00260716	4.48342e-05	1	0.887847	28.9043	0.891703	52.7987	34.8083	9.03238	1	0.921884	22.3838	0.838015	37.8242	35.1489	37.1281	1	0.965456	57.4765	0.948178	32.9733	43.3304	21.6688
AT1G66970.1	83788	| SHV3-like 2 | Chr1:24992746-24996005 REVERSE LENGTH=763 | 201606	10	10	0.00578994	0.000304654	2.22359e-06	1	3.30923	2.58838	1.98157	2.20055	4.91629	3.1401	1	1.82525	0.476088	1.30887	2.91959	2.39369	2.35439	1	2.89788	1.69173	2.62079	2.25229	7.36488	6.4907
AT1G67090.1	20216	| ribulose bisphosphate carboxylase small chain 1A | Chr1:25048465-25049249 REVERSE LENGTH=180 | 201606	109	57	7.16753e-05	0.000220412	5.83314e-05	1	0.829142	0.928253	0.828727	0.770109	0.820841	1.12665	1	0.885913	0.876001	0.855114	0.676816	0.739474	0.702791	1	0.754097	0.764939	0.768158	0.791569	0.675559	0.762422
AT1G67230.1	129093	| little nuclei1 | Chr1:25151561-25156032 REVERSE LENGTH=1132 | 201606	5	5	0.019559	0.0189331	5.75085e-06	1	11.875	6.1075	14.8524	9.99325	20.3958	60.2681	1	12.4784	11.5113	27.7171	10.9084	43.0742	36.7832	1	6.73114	6.48029	12.7794	3.6673	40.7925	49.5183
AT1G67280.1	39167	| Glyoxalase/Bleomycin resistance protein/Dioxygenase superfamily protein | Chr1:25188563-25190547 REVERSE LENGTH=350 | 201606	27	26	0.00246738	0.0155064	0.152883	1	0.958298	0.767488	1.02622	0.845049	1.03177	1.32558	1	1.15094	0.94058	1.02841	0.877683	1.16364	1.30463	1	0.869687	0.878319	0.9206	0.868519	1.00276	1.09011
AT1G67350.1	11791	| NADH-ubiquinone oxidoreductase | Chr1:25235826-25236122 FORWARD LENGTH=98 | 201606	7	7	0.00212707	0.00271877	0.116018	1	0.886611	1.41513	2.01019	1.7109	2.04263	3.03758	1	0.590717	1.08247	1.36567	1.28987	1.59761	2.12451	1	1.51547	1.81406	1.69447	1.93664	2.17882	1.85802
AT1G67360.1	26425	| Rubber elongation factor protein (REF) | Chr1:25237072-25237913 REVERSE LENGTH=240 | 201606	6	6	9.0667e-11	0.000210077	0.00924085	1	0.887847	0.866903	0.891703	3.8726	100.808	3.59736	1	0.921884	6.00301	14.0562	37.8242	91.5559	53.0882	1	0.965456	28.3391	0.948178	6.35775	40.1735	18.5032
AT1G67360.2	26425	| Rubber elongation factor protein (REF) | Chr1:25237072-25237913 REVERSE LENGTH=240 | 201606	7	7	9.0667e-11	9.83804e-05	0.00924085	1	0.887847	0.866903	0.891703	3.8726	100.808	3.59736	1	0.921884	6.00301	0.838015	37.8242	91.5559	53.0882	1	0.965456	28.3391	0.948178	6.35775	40.1735	18.5032
AT1G67430.1	19854	| Ribosomal protein L22p/L17e family protein | Chr1:25262209-25263627 FORWARD LENGTH=175 | 201606	18	2	4.6535e-09	2.8501e-12	1.96646e-11	1	0.91902	0.00489093	0.00503085	0.00559649	0.00486654	0.00509594	1	0.934351	0.00428902	0.00424808	0.00418529	0.00409078	0.00401993	1	1.13097	0.00547843	0.00537168	0.0051186	0.0049271	0.00525916
AT1G67550.1	91024	| urease | Chr1:25312842-25316911 FORWARD LENGTH=838 | 201606	10	10	0.000611048	6.64416e-06	0.000895257	1	5.18019	3.59627	7.41209	1.7564	14.3163	13.5377	1	1.38706	5.37912	8.99865	5.96906	9.84013	10.0662	1	1.74082	3.0487	3.75632	2.35304	5.0526	3.54112
AT1G67560.1	104516	| PLAT/LH2 domain-containing lipoxygenase family protein | Chr1:25319926-25324117 FORWARD LENGTH=917 | 201606	2	2	0.00147492	0.183967	0.0601901	1	2.01233	0.258955	0.263624	0.0749245	0.661372	0.476555	1	0.337397	0.0790704	0.0783157	0.535926	1.00158	0.741096	1	0.0577753	0.21942	0.220288	0.553306	0.692833	1.1128
AT1G67680.1	73070	| SRP72 RNA-binding domain-containing protein | Chr1:25365962-25368464 REVERSE LENGTH=664 | 201606	12	12	0.00351406	0.239616	0.220225	1	1.29861	1.73222	1.65959	0.649984	1.08794	1.56443	1	0.658283	1.05176	0.976001	1.1096	0.935907	0.981836	1	1.06777	1.21007	1.43521	1.57143	1.23208	1.31828
AT1G67700.1	26010	| multidrug resistance protein | Chr1:25374295-25375716 FORWARD LENGTH=230 | 201606	15	15	8.18808e-05	0.000247445	6.88976e-05	1	0.92141	0.930015	0.86902	0.799684	0.583679	0.473679	1	0.805319	0.761376	0.683345	0.641879	0.608682	0.421938	1	0.965056	0.768893	0.795599	0.718802	0.633317	0.558602
AT1G67730.1	35762	| beta-ketoacyl reductase 1 | Chr1:25391676-25393365 FORWARD LENGTH=318 | 201606	12	12	4.08932e-05	0.0116824	0.0175367	1	0.865719	0.690245	0.947999	0.554728	0.635683	0.106608	1	0.481639	0.495294	0.680348	0.799427	0.731867	0.694117	1	1.32463	1.04886	1.04947	0.755201	0.609395	0.650896
AT1G67760.1	13343	| TCP-1/cpn60 chaperonin family protein | Chr1:25405814-25406272 REVERSE LENGTH=120 | 201606	3	1	7.73015e-08	6.37773e-07	8.5016e-09	1	0.0379118	0.0370174	0.0380764	0.0423575	0.0368328	0.038569	1	0.0558991	0.0513034	0.0508136	0.0500625	0.048932	0.0480846	1	0.036116	0.0361745	0.0354697	0.0337985	0.032534	0.0347267
AT1G67840.1	66843	| chloroplast sensor kinase | Chr1:25434156-25436839 FORWARD LENGTH=611 | 201606	4	4	0.0103989	0.0623842	0.171956	1	0.666096	1.08148	1.45835	0.0372103	0.53657	0.789934	1	0.785572	0.712172	0.705374	0.0347473	0.792401	0.770206	1	0.645758	0.640131	0.966493	0.0454227	0.589808	0.933401
AT1G67840.2	49288	| chloroplast sensor kinase | Chr1:25434156-25436216 FORWARD LENGTH=445 | 201606	5	5	3.99132e-06	9.33347e-22	0.000289798	1	0.887847	0.866903	38.877	0.99196	0.862579	0.903238	1	0.921884	0.846091	16.7603	0.825627	0.806983	0.793008	1	0.965456	0.967021	19.2246	0.903506	0.869703	0.928317
AT1G67930.1	91651	| Golgi transport complex protein-like protein | Chr1:25474218-25477332 REVERSE LENGTH=832 | 201606	4	4	0.000146335	0.609148	0.679751	1	2.02179	4.21768	1.44044	0.977789	0.870555	0.0879929	1	0.479025	1.47694	0.840225	1.22268	1.63641	1.21492	1	1.89104	2.65463	2.27214	3.43897	3.71332	1.81332
AT1G67980.1	26114	| caffeoyl-CoA 3-O-methyltransferase | Chr1:25487724-25488934 FORWARD LENGTH=232 | 201606	10	10	1.91932e-05	0.000221617	8.50513e-10	1	0.887847	0.866903	0.891703	0.99196	0.862579	0.903238	1	0.921884	0.846091	0.838015	0.825627	0.806983	0.793008	1	0.965456	0.967021	0.948178	0.903506	77.9859	0.928317
AT1G68010.1	42248	| hydroxypyruvate reductase | Chr1:25493418-25495720 FORWARD LENGTH=386 | 201606	83	83	9.2311e-08	2.77799e-07	4.66051e-09	1	0.878093	1.02593	0.984999	0.877603	0.675696	0.525913	1	0.999887	1.0254	0.885189	0.68079	0.691154	0.587354	1	0.907954	0.849104	0.816953	0.846438	0.470158	0.575114
AT1G68010.2	42347	| hydroxypyruvate reductase | Chr1:25493418-25495720 FORWARD LENGTH=387 | 201606	82	82	6.0517e-12	5.31998e-12	5.13665e-14	1	0.000506904	1.02593	0.984999	0.877603	0.675696	0.525913	1	0.000602955	1.0254	0.885189	0.68079	0.691154	0.587354	1	0.00050993	0.849104	0.816953	0.846438	0.470158	0.575114
AT1G68100.1	50583	| ZIP metal ion transporter family | Chr1:25521325-25524032 FORWARD LENGTH=469 | 201606	2	2	0.146523	0.0228316	0.120629	1	2.96144	2.16314	2.22503	1.69491	2.2298	0.225381	1	1.52144	2.69213	2.01578	3.24542	3.88227	3.17666	1	1.38312	1.89314	1.7934	0.512992	2.50615	0.931465
AT1G68300.1	17332	| Adenine nucleotide alpha hydrolases-like superfamily protein | Chr1:25598518-25599261 REVERSE LENGTH=160 | 201606	3	3	0.00429722	0.0414768	0.000352946	1	1.17706	0.61075	0.0891703	1.31203	1.71137	1.80648	1	1.32292	0.607078	0.0601283	1.18479	1.15479	1.91042	1	0.580037	0.761188	0.0569657	1.25946	1.21808	1.85782
AT1G68310.1	17915	| MIP18 family protein (DUF59) | Chr1:25599812-25601239 FORWARD LENGTH=159 | 201606	2	2	0.276854	0.36893	0.54887	1	0.467671	1.09987	1.10189	0.288596	1.06378	1.12076	1	0.913078	2.44282	1.61601	2.32069	1.58008	2.28234	1	0.571517	0.935073	0.565358	0.898416	0.682738	1.28373
AT1G68530.1	56396	| 3-ketoacyl-CoA synthase 6 | Chr1:25712881-25714733 REVERSE LENGTH=497 | 201606	11	9	0.000668058	1.44771e-08	0.000116001	1	0.885277	1.05584	0.665355	0.682249	0.785559	0.124814	1	0.115798	0.404593	0.279105	0.152818	0.556967	0.315811	1	0.272946	0.322766	0.30864	0.276004	0.188188	0.282227
AT1G68560.1	102399	| alpha-xylosidase 1 | Chr1:25734435-25737897 REVERSE LENGTH=915 | 201606	21	21	1.60037e-08	1.59085e-06	1.37741e-09	1	2.0238	0.97574	0.978084	0.915688	0.754525	0.474627	1	2.33679	1.0962	0.808003	0.701225	0.793461	0.568314	1	2.28715	0.558592	0.619099	0.704337	0.660263	0.665775
AT1G68590.1	18472	| Ribosomal protein PSRP-3/Ycf65 | Chr1:25757593-25758169 REVERSE LENGTH=166 | 201606	9	9	0.00142479	1.56979e-06	0.000181305	1	1.05409	0.567576	0.797691	1.19576	0.564893	1.4032	1	1.92233	0.775702	0.693222	0.711129	0.49554	0.726218	1	1.51448	0.405413	0.570525	1.05664	0.611411	1.30305
AT1G68600.1	60222	| aluminum activated malate transporter family protein | Chr1:25759947-25762778 FORWARD LENGTH=537 | 201606	2	2	0.156683	0.119443	0.343853	1	2.64333	1.44636	1.4786	2.63279	1.72516	1.20258	1	0.848507	1.4798	1.09325	0.773734	3.15296	1.78423	1	0.407065	1.14433	0.573409	0.546394	0.901139	0.393199
AT1G68680.1	8351	| SH3/FCH domain protein | Chr1:25785627-25786622 FORWARD LENGTH=75 | 201606	3	3	0.0361034	0.0984188	0.306884	1	1.07091	2.62232	2.33894	0.808208	0.879292	0.726464	1	0.776196	2.0137	0.565706	0.688081	1.78995	0.820635	1	2.62542	3.30106	2.57691	2.25006	3.00112	1.82978
AT1G68830.1	63252	| Serine/Threonine kinase domain protein | Chr1:25872654-25875473 REVERSE LENGTH=562 | 201606	29	29	8.93734e-06	0.306776	0.112696	1	1.24009	1.08412	1.06264	0.99188	1.29283	0.209909	1	1.04545	0.812068	0.999709	0.733762	1.06789	0.873774	1	1.41092	1.40273	1.44658	0.860218	1.08103	0.9285
AT1G69200.1	68980	| fructokinase-like protein | Chr1:26016024-26018365 FORWARD LENGTH=614 | 201606	11	11	0.00028937	0.00269363	0.00643506	1	2.59273	2.46262	2.85242	1.53084	1.7405	0.578492	1	1.05247	1.32872	1.15415	0.77175	0.728744	0.264708	1	1.26483	0.891248	1.71664	1.01395	0.432325	0.346791
AT1G69250.1	46675	| Nuclear transport factor 2 (NTF2) family protein with RNA binding (RRM-RBD-RNP motifs) domain-containing protein | Chr1:26033163-26035301 FORWARD LENGTH=427 | 201606	5	5	0.0133136	0.0738293	0.318958	1	0.217776	3.54211	3.64306	0.95953	1.45859	1.55468	1	0.949125	2.56853	1.67978	3.73875	1.87872	1.32879	1	2.22789	2.19116	2.63054	3.78251	2.39902	1.71403
AT1G69250.2	42914	| Nuclear transport factor 2 (NTF2) family protein with RNA binding (RRM-RBD-RNP motifs) domain-containing protein | Chr1:26033163-26035007 FORWARD LENGTH=389 | 201606	4	4	0.000619578	0.00183041	0.000172406	1	0.887847	14.4408	0.891703	0.99196	5.9465	6.33827	1	0.921884	25.6853	0.838015	0.825627	18.7872	13.2879	1	0.965456	15.7961	0.948178	0.903506	17.2946	12.3565
AT1G69340.1	63305	| appr-1-p processing enzyme family protein | Chr1:26066298-26069644 FORWARD LENGTH=562 | 201606	5	5	0.0587929	0.00956497	0.090274	1	2.4258	1.2975	0.880784	0.506829	2.13241	0.694133	1	1.1071	0.517081	0.197309	0.189501	2.25677	1.58055	1	1.94254	2.57566	1.42928	0.906281	2.37987	0.279594
AT1G69410.1	17207	| eukaryotic elongation factor 5A-3 | Chr1:26089301-26090194 FORWARD LENGTH=158 | 201606	7	5	0.002345	0.0227906	0.00148588	1	4.56169	8.11614	9.04425	5.05567	5.80591	14.6269	1	8.03475	12.941	10.7498	12.8602	10.3622	10.176	1	6.83127	9.01025	5.33598	7.25624	6.59504	6.13359
AT1G69460.1	24414	| emp24/gp25L/p24 family/GOLD family protein | Chr1:26112054-26113160 REVERSE LENGTH=214 | 201606	4	4	0.0635649	0.0404277	0.562585	1	2.31738	5.16075	0.891388	1.73478	0.866123	0.230682	1	0.0921884	1.95015	1.11944	2.39638	1.61849	0.793008	1	1.84386	3.96369	1.36822	2.23064	3.73151	1.81072
AT1G69523.1	33398	| S-adenosyl-L-methionine-dependent methyltransferases superfamily protein | Chr1:26129827-26131157 FORWARD LENGTH=300 | 201606	3	3	2.48945e-05	0.0138542	8.00805e-06	1	1.10633	0.0649765	0.0668353	0.0743499	0.0646524	0.0677	1	0.699676	0.0485	0.048037	0.0473269	0.0462582	0.0454571	1	0.721738	0.0361454	0.0354411	0.0337713	0.0325078	0.0346987
AT1G69620.1	13650	| ribosomal protein L34 | Chr1:26189900-26191081 FORWARD LENGTH=119 | 201606	10	4	0.0474478	0.0781339	0.00488763	1	0.844462	0.753384	0.918184	0.632135	0.578423	0.327448	1	0.487976	1.00768	0.886613	0.887085	0.804453	0.763886	1	1.41425	1.33636	0.980885	1.18624	0.736069	0.82246
AT1G69740.1	46690	| Aldolase superfamily protein | Chr1:26232197-26234713 FORWARD LENGTH=430 | 201606	25	25	1.4935e-07	4.80041e-09	2.40031e-05	1	0.742682	0.696851	0.810808	0.938828	0.35469	0.693212	1	0.988756	0.644431	0.609306	0.472067	0.366801	0.275261	1	0.851352	0.585734	0.785588	0.785917	0.348191	0.469739
AT1G69800.1	47818	| Cystathionine beta-synthase (CBS) protein | Chr1:26274416-26276105 REVERSE LENGTH=447 | 201606	7	7	0.145655	0.0688334	0.111951	1	0.89029	0.720761	0.894063	0.990868	1.01143	0.451619	1	0.690682	0.698194	1.04752	0.89022	1.07492	1.19076	1	0.80685	1.50873	1.02787	0.600455	0.869584	1.00716
AT1G69800.2	51383	| Cystathionine beta-synthase (CBS) protein | Chr1:26274416-26276325 REVERSE LENGTH=476 | 201606	6	6	1.24251e-06	1.03005e-08	4.19435e-05	1	35.6116	0.866903	0.891703	39.6347	40.4571	18.0648	1	27.6273	0.846091	0.838015	35.6088	42.9967	47.6305	1	32.1861	0.967021	0.948178	23.9528	34.6886	40.1769
AT1G69800.3	39947	| Cystathionine beta-synthase (CBS) protein | Chr1:26274719-26276105 REVERSE LENGTH=373 | 201606	6	6	3.2839e-30	2.3696e-10	3.64428e-08	1	0.887847	0.866903	0.891703	0.99196	0.862579	18.0648	1	0.921884	0.846091	0.838015	0.825627	0.806983	47.6305	1	0.965456	0.967021	0.948178	0.903506	0.869703	40.1769
AT1G69830.1	99842	| alpha-amylase-like 3 | Chr1:26288518-26293003 REVERSE LENGTH=887 | 201606	42	42	0.000110173	0.00125537	4.45811e-05	1	0.942937	1.10239	1.12288	1.11568	0.932297	1.39661	1	0.828715	0.656461	0.835913	0.490854	0.734277	0.563221	1	0.713571	0.625831	0.608469	0.561363	0.427464	0.615805
AT1G69840.1	31406	| SPFH/Band 7/PHB domain-containing membrane-associated protein family | Chr1:26293932-26295150 REVERSE LENGTH=286 | 201606	17	14	0.248708	0.00116913	8.93106e-06	1	1.83077	1.4632	1.78773	1.52368	2.00165	1.52435	1	2.63188	2.60251	2.23942	3.97137	3.63116	4.11976	1	2.32403	2.26723	3.03866	2.90261	4.78562	3.10516
AT1G69960.1	35042	| serine/threonine protein phosphatase 2A | Chr1:26348892-26350511 REVERSE LENGTH=307 | 201606	7	2	0.115362	0.115856	0.874561	1	2.99042	3.13073	2.79639	3.04721	2.88802	1.52421	1	0.935166	1.56788	1.97428	2.28929	2.72031	1.60126	1	1.68293	1.27876	1.30561	1.57324	1.50326	1.61879
AT1G70290.1	97561	| trehalose-6-phosphatase synthase S8 | Chr1:26471286-26474078 REVERSE LENGTH=856 | 201606	12	9	0.0209561	0.00797953	0.00262673	1	1.0854	0.747372	1.09359	0.782306	1.6115	0.585536	1	1.24415	0.42013	1.94901	1.40631	1.61079	2.17011	1	0.741496	1.10449	2.3818	1.58931	2.53322	1.56855
AT1G70310.1	37140	| spermidine synthase 2 | Chr1:26485497-26487352 REVERSE LENGTH=340 | 201606	15	10	0.0645016	0.00398078	0.219634	1	1.04264	0.930899	1.09205	1.26812	0.749022	1.01662	1	1.14981	0.862758	1.01055	0.990795	0.76465	0.696152	1	0.942433	0.809541	1.01325	0.881276	0.65248	0.760841
AT1G70320.1	403618	| ubiquitin-protein ligase 2 | Chr1:26488745-26501281 REVERSE LENGTH=3658 | 201606	4	2	0.000396853	0.0796035	0.00204446	1	17.6592	0.866903	0.891703	0.99196	6.0706	0.903238	1	3.61031	0.846091	0.838015	0.825627	3.26737	10.9729	1	1.41482	0.0709741	0.0695912	0.0663125	1.48805	0.274192
AT1G70410.1	28412	| beta carbonic anhydrase 4 | Chr1:26534167-26536505 REVERSE LENGTH=258 | 201606	31	2	1.05712e-13	5.31694e-13	6.25021e-12	1	0.0023167	1.01765	1.35587	0.00258836	0.00225076	0.00235686	1	0.00247308	0.991051	1.08747	0.00221485	0.00216484	0.00212735	1	0.00224673	1.07429	1.16815	0.00210256	0.0020239	0.0021603
AT1G70410.2	30836	| beta carbonic anhydrase 4 | Chr1:26534167-26537457 REVERSE LENGTH=280 | 201606	33	18	0.000393827	7.57481e-05	0.00233584	1	1.05915	1.0944	1.46082	1.48671	1.08282	1.22738	1	1.23563	1.01334	1.16246	1.05107	0.786323	0.801528	1	1.19713	1.09894	1.18807	0.998418	0.709151	0.95751
AT1G70520.1	72001	| cysteine-rich RLK (RECEPTOR-like protein kinase) 2 | Chr1:26584888-26587334 REVERSE LENGTH=649 | 201606	2	2	0.751743	0.458843	0.242506	1	1.33143	1.0862	0.668353	0.992193	0.859322	0.700509	1	0.634899	1.69511	0.841187	0.815232	1.35432	1.06241	1	0.964564	0.708677	0.713961	0.675426	1.72439	1.3845
AT1G70530.1	71611	| cysteine-rich RLK (RECEPTOR-like protein kinase) 3 | Chr1:26588750-26591379 REVERSE LENGTH=646 | 201606	4	4	0.145157	0.0585142	0.423507	1	0.715767	0.699263	0.537778	0.807787	1.56419	0.38051	1	0.220509	0.851297	0.672714	0.66144	1.30494	1.11271	1	0.727663	0.728843	1.17238	0.709645	1.31099	1.39806
AT1G70570.1	65225	| anthranilate phosphoribosyltransferase | Chr1:26608719-26612062 FORWARD LENGTH=595 | 201606	18	18	4.87667e-05	0.0717907	0.00345936	1	1.12915	1.29613	1.83075	1.54149	1.96334	2.85651	1	0.919378	1.4615	1.52199	1.28739	1.68793	1.62688	1	0.725683	0.762081	0.876834	1.03476	1.21177	1.56312
AT1G70570.2	69803	| anthranilate phosphoribosyltransferase | Chr1:26608719-26612062 FORWARD LENGTH=632 | 201606	14	14	1.80187e-07	2.69962e-07	3.39546e-09	1	1.12915	0.0144299	0.0148427	1.54149	0.0143579	0.0150347	1	0.919378	0.0115499	0.0114396	1.28739	0.011016	0.0108253	1	0.725683	0.0103877	0.0101853	1.03476	0.00934229	0.00997191
AT1G70580.1	53444	| alanine-2-oxoglutarate aminotransferase 2 | Chr1:26613222-26615845 FORWARD LENGTH=481 | 201606	75	20	0.000139423	0.000582163	0.00168294	1	0.981339	1.05211	1.05993	1.18955	0.820832	1.08843	1	1.06306	1.0045	1.03193	1.00312	0.793843	0.847318	1	0.792685	0.883216	0.870032	0.94284	0.714159	0.81286
AT1G70600.1	16455	| Ribosomal protein L18e/L15 superfamily protein | Chr1:26621168-26621608 REVERSE LENGTH=146 | 201606	16	1	0.00975573	0.0038419	0.00294031	1	1.49937	1.4978	1.18728	0.962649	0.95491	0.631923	1	1.5357	1.84142	1.4051	1.31351	1.09348	0.941725	1	1.08406	0.893488	0.828274	0.746488	0.699602	0.537659
AT1G70610.1	78039	| transporter associated with antigen processing protein 1 | Chr1:26622086-26626331 FORWARD LENGTH=700 | 201606	6	6	0.00173673	0.000776152	0.0457275	1	0.782104	0.87617	0.337741	0.257274	0.032671	0.0342111	1	0.490449	0.318	0.189813	0.305601	0.0182785	0.0179619	1	0.451487	0.550744	0.313158	0.360265	0.017432	0.0186069
AT1G70660.1	18001	| MMS ZWEI homologue 2 | Chr1:26640755-26641949 FORWARD LENGTH=159 | 201606	4	3	0.00960087	0.0274639	0.399028	1	0.883105	0.936566	1.20697	0.271709	0.401579	0.651104	1	1.80182	1.33498	1.65011	1.42367	0.489147	0.325618	1	0.822274	0.653805	0.580083	0.62899	0.536304	0.358847
AT1G70690.1	31804	| Receptor-like protein kinase-related family protein | Chr1:26652099-26653381 FORWARD LENGTH=299 | 201606	2	2	0.00707089	1.61472e-05	0.000168287	1	3.0311	1.55982	0.227736	0.253341	2.96328	0.230682	1	0.921884	0.846091	11.1944	30.0047	29.5499	23.8402	1	3.85991	9.47985	18.5916	6.34461	49.0584	15.4468
AT1G70730.1	63482	| Phosphoglucomutase/phosphomannomutase family protein | Chr1:26669020-26672726 REVERSE LENGTH=585 | 201606	59	37	4.02207e-10	3.9212e-10	1.16639e-10	1	0.00134434	1.01444	1.03093	1.05331	1.01022	0.783825	1	0.00129819	0.862173	0.958902	0.902365	0.874626	0.758258	1	0.00126425	0.949302	0.948201	0.946513	0.819923	0.789766
AT1G70730.3	72558	| Phosphoglucomutase/phosphomannomutase family protein | Chr1:26669020-26673166 REVERSE LENGTH=662 | 201606	59	37	0.00297749	0.00248305	0.00381382	1	1.1108	1.01444	1.03093	1.05331	1.01022	0.783825	1	1.05145	0.862173	0.958902	0.902365	0.874626	0.758258	1	1.06984	0.949302	0.948201	0.946513	0.819923	0.789766
AT1G70770.1	66865	| transmembrane protein (Protein of unknown function DUF2359%2C transmembrane) | Chr1:26688622-26691185 REVERSE LENGTH=610 | 201606	16	16	0.0141583	0.0179618	0.189836	1	1.3726	0.96597	0.530314	0.875329	0.452283	0.137119	1	0.709317	0.841375	0.753342	1.26464	0.787302	0.611581	1	0.884764	1.03182	0.979338	1.03197	0.919827	0.557491
AT1G70810.1	18657	| Calcium-dependent lipid-binding (CaLB domain) family protein | Chr1:26704207-26705091 FORWARD LENGTH=165 | 201606	5	5	0.0409057	0.0596751	0.0177638	1	1.40496	0.68704	1.05446	0.976381	1.70336	2.15445	1	0.935083	0.688825	2.18045	2.15502	1.94957	2.07936	1	0.963711	1.90683	3.05599	2.69887	3.6692	2.78729
AT1G70820.1	67313	| phosphoglucomutase%2C putative / glucose phosphomutase | Chr1:26705594-26708034 FORWARD LENGTH=615 | 201606	23	23	0.0116566	0.000740862	0.0424902	1	1.52613	1.16997	1.41629	1.14528	0.912957	1.00923	1	1.49202	1.02912	1.11377	0.732446	0.758538	0.663127	1	0.789709	0.564738	0.749464	0.650211	0.40915	0.680089
AT1G70830.1	37615	| MLP-like protein 28 | Chr1:26710203-26711395 REVERSE LENGTH=335 | 201606	4	4	0.00100659	0.0138761	0.00181087	1	0.886219	0.576138	0.694497	0.715379	0.197621	0.501305	1	0.645816	0.767688	0.67625	0.251204	0.331782	0.024128	1	0.193672	0.100357	0.609298	0.576408	0.0238041	0.431577
AT1G70890.1	17889	| MLP-like protein 43 | Chr1:26725912-26726489 REVERSE LENGTH=158 | 201606	11	11	7.29834e-05	4.42714e-05	0.0255128	1	1.01301	1.00877	0.937051	0.926188	1.18511	1.62128	1	0.799259	0.687624	0.879299	0.525058	0.976483	1.18884	1	0.961731	1.05391	1.12942	0.990715	0.633097	1.35692
AT1G70940.1	69466	| Auxin efflux carrier family protein | Chr1:26743170-26745871 FORWARD LENGTH=640 | 201606	4	3	0.00119799	0.048286	0.0466196	1	5.56162	4.16766	1.28801	1.0217	2.9418	0.960828	1	0.937388	1.55588	0.360077	0.667522	0.830838	1.14009	1	0.962397	1.16049	0.699065	0.337713	0.432749	0.346987
AT1G70980.1	63700	| Class II aminoacyl-tRNA and biotin synthetases superfamily protein | Chr1:26762339-26764394 FORWARD LENGTH=571 | 201606	7	3	0.00587622	0.0363857	0.00517431	1	2.94231	4.60834	2.37694	1.32376	4.29323	1.23772	1	1.56937	2.78458	4.72291	5.05113	4.82423	1.57285	1	1.93671	1.91314	2.85204	1.95168	3.0412	1.2365
AT1G71040.1	66165	| Cupredoxin superfamily protein | Chr1:26797201-26800224 REVERSE LENGTH=581 | 201606	9	9	2.58465e-05	0.263183	0.00506202	1	2.00564	0.728322	1.03973	0.667366	1.94732	0.165618	1	1.72209	1.56138	1.76699	2.60811	1.50126	1.86256	1	3.10703	1.47012	1.6927	2.11035	4.46455	1.75083
AT1G71100.1	28332	| Ribose 5-phosphate isomerase%2C type A protein | Chr1:26814726-26815529 FORWARD LENGTH=267 | 201606	2	2	6.38516e-05	4.87915e-05	4.51473e-05	1	0.887847	0.866903	0.891703	10.2004	11.4355	24.0715	1	0.921884	0.846091	0.838015	16.0758	0.806983	13.2879	1	0.965456	0.967021	0.948178	24.2119	11.5776	21.6567
AT1G71220.1	181804	| EMS-MUTAGENIZED BRI1 SUPPRESSOR 1 | Chr1:26841664-26851730 FORWARD LENGTH=1613 | 201606	25	1	0.000792878	0.0346848	0.0568931	1	0.981609	0.841544	0.865213	1.18579	1.35423	0.272131	1	0.971619	1.37282	1.21363	1.78199	1.6385	1.20746	1	1.05108	1.2828	1.16544	1.19444	1.6843	0.983445
AT1G71220.2	181932	| EMS-MUTAGENIZED BRI1 SUPPRESSOR 1 | Chr1:26841664-26851730 FORWARD LENGTH=1614 | 201606	25	1	0.000769561	0.0242348	0.0321723	1	0.981609	0.870606	0.865213	1.15324	1.41257	0.272131	1	0.905419	1.37485	1.24502	1.78462	1.67118	1.2373	1	1.05443	1.34923	1.17238	1.25809	1.76281	0.985504
AT1G71270.1	80938	| Vps52 / Sac2 family | Chr1:26863736-26869817 FORWARD LENGTH=707 | 201606	3	3	0.00719657	0.00265286	0.0549704	1	1.10683	0.674929	0.668353	0.0743499	0.646524	0.0677	1	2.0643	1.03071	0.242876	0.061121	0.793407	0.587062	1	1.6839	1.62932	1.16283	0.0675426	1.08497	0.923724
AT1G71310.1	19484	| cobalt ion binding protein | Chr1:26878717-26879844 REVERSE LENGTH=176 | 201606	5	5	0.15111	0.379193	0.365875	1	0.881286	0.864306	0.811862	0.580242	0.709813	1.1237	1	0.815442	0.839021	1.10925	0.616858	1.15585	1.22231	1	0.669749	0.836427	0.745016	0.694731	0.739303	1.21828
AT1G71480.1	23520	| Nuclear transport factor 2 (NTF2) family protein | Chr1:26932079-26933086 FORWARD LENGTH=216 | 201606	6	6	0.538589	0.245595	0.215921	1	0.747064	1.0144	1.0428	1.47027	1.44173	1.21039	1	1.08748	1.18271	1.84574	0.827748	1.60636	1.57139	1	0.430403	0.871887	0.64128	0.403822	0.674833	0.723381
AT1G71500.1	31727	| Rieske (2Fe-2S) domain-containing protein | Chr1:26936084-26937331 FORWARD LENGTH=287 | 201606	28	28	0.00182768	0.000182688	0.761885	1	0.869386	0.787079	0.699373	0.72259	0.811463	0.674486	1	0.908032	0.769211	0.665586	0.641837	0.735525	0.667582	1	0.942126	0.945818	0.920013	1.00109	0.943616	0.89518
AT1G71695.1	39559	| Peroxidase superfamily protein | Chr1:26964359-26966557 FORWARD LENGTH=358 | 201606	20	20	0.000342705	0.000625903	0.00622958	1	1.38689	1.08211	1.16888	1.09023	1.46131	0.846	1	1.21197	1.11571	1.39124	1.23813	1.70867	1.31336	1	0.937157	0.822899	1.13863	0.921408	0.936185	1.09947
AT1G71720.1	56326	| Nucleic acid-binding proteins superfamily | Chr1:26983744-26985893 FORWARD LENGTH=500 | 201606	4	4	0.141832	0.00060739	0.326338	1	2.66354	1.15152	2.39302	1.70022	1.72222	0.931388	1	0.394434	0.251016	0.722983	0.0353249	0.240003	0.132979	1	0.731061	0.142475	0.475935	0.67735	0.335228	0.713515
AT1G71720.2	48141	| Nucleic acid-binding proteins superfamily | Chr1:26983744-26985506 FORWARD LENGTH=429 | 201606	4	4	0.00548102	0.00199946	0.0672819	1	26.6354	11.5152	23.9302	17.0022	17.2222	0.903238	1	9.21884	5.86684	16.8978	0.825627	5.60944	0.793008	1	19.3993	3.78069	12.6293	17.974	8.89554	0.928317
AT1G71730.1	19578	| hypothetical protein | Chr1:26986298-26986831 REVERSE LENGTH=177 | 201606	2	2	0.00420384	0.0992436	0.127969	1	2.13302	2.0744	1.28801	0.143282	0.124594	0.130467	1	0.881598	2.67353	2.27107	1.87114	0.757268	0.107055	1	1.36772	2.2198	1.77342	0.888421	2.07642	0.13151
AT1G71750.1	20879	| Hypoxanthine-guanine phosphoribosyltransferase | Chr1:26987954-26989144 REVERSE LENGTH=188 | 201606	3	3	0.000188812	0.0111555	0.371531	1	1.60275	7.38201	3.81733	5.06682	5.13105	3.0764	1	0.950212	0.448912	1.66958	2.83365	1.61548	1.7828	1	1.88097	1.38408	0.915664	1.98369	1.69046	1.58071
AT1G71820.1	85674	| SEC6 | Chr1:27010022-27016745 FORWARD LENGTH=752 | 201606	11	11	0.000269911	0.044104	0.191894	1	3.42464	3.92512	2.3839	2.30647	2.74918	0.907883	1	2.17769	1.69086	1.45773	2.44467	2.51272	1.88016	1	1.34773	1.2089	0.882924	1.08005	1.61224	1.04793
AT1G71820.2	88449	| SEC6 | Chr1:27010022-27016745 FORWARD LENGTH=774 | 201606	9	9	3.2839e-30	3.94715e-13	3.76058e-08	1	0.887847	0.866903	0.891703	0.99196	0.862579	18.0648	1	0.921884	0.846091	0.838015	0.825627	0.806983	50.2844	1	0.965456	0.967021	0.948178	0.903506	0.869703	52.5334
AT1G71840.1	43791	| transducin family protein / WD-40 repeat family protein | Chr1:27022424-27024380 FORWARD LENGTH=407 | 201606	6	6	0.169284	0.0709587	0.799859	1	1.11195	1.01116	1.11275	0.824483	0.581257	0.905785	1	1.07546	0.987606	1.21616	0.813566	0.584644	0.784556	1	0.966516	1.13758	1.23251	0.909512	0.961767	0.744747
AT1G71860.1	37799	| protein tyrosine phosphatase 1 | Chr1:27026866-27028675 FORWARD LENGTH=340 | 201606	13	13	0.00216601	0.000564477	0.109262	1	0.927446	1.05805	1.44022	0.943758	1.01508	0.747338	1	2.0458	1.95191	2.43766	2.24352	2.00062	2.71558	1	1.45064	1.10259	1.41663	1.4529	1.87542	1.25595
AT1G71880.1	54858	| sucrose-proton symporter 1 | Chr1:27054334-27056100 FORWARD LENGTH=513 | 201606	3	3	0.260441	0.160318	0.000278697	1	3.49075	0.866903	0.891703	0.99196	20.2926	0.903238	1	0.921884	0.846091	3.28079	18.7964	16.5852	8.31895	1	0.965456	0.967021	6.71776	3.59396	48.97	0.928317
AT1G71920.1	46361	| HISTIDINE BIOSYNTHESIS 6B | Chr1:27067168-27068999 FORWARD LENGTH=415 | 201606	10	10	0.0216489	0.0560194	0.602177	1	2.6523	2.82413	1.50276	1.1389	3.40576	0.896135	1	1.0626	1.64811	1.96182	1.17216	2.52364	2.16414	1	1.25355	1.12934	1.12661	1.53076	1.46756	1.02066
AT1G71950.1	14852	| Proteinase inhibitor%2C propeptide | Chr1:27080453-27081573 REVERSE LENGTH=136 | 201606	5	5	8.76136e-05	0.000222695	0.00671436	1	1.78614	1.73892	0.0891703	1.65948	0.0862579	3.91107	1	3.08032	3.25726	0.12032	2.68891	0.115865	4.57322	1	2.46432	1.81698	0.091047	2.30785	0.0835116	3.26442
AT1G72010.1	39599	| TCP family transcription factor | Chr1:27107844-27108971 FORWARD LENGTH=375 | 201606	4	4	0.273904	0.104719	0.0219911	1	1.04323	1.15946	0.750658	1.14267	1.14502	2.1062	1	1.03345	0.517621	0.672714	0.739772	0.9774	1.20459	1	0.526049	0.955383	0.434631	0.493117	0.866503	1.09844
AT1G72150.1	64046	| PATELLIN 1 | Chr1:27148558-27150652 FORWARD LENGTH=573 | 201606	67	61	1.23828e-05	7.49283e-08	0.000237369	1	1.5885	1.42584	1.58432	1.4538	1.78186	1.62463	1	1.604	1.33151	1.62787	1.04403	1.58059	1.64724	1	1.78438	1.48542	1.58744	1.22756	1.26504	1.56545
AT1G72160.1	56105	| Sec14p-like phosphatidylinositol transfer family protein | Chr1:27153823-27155609 REVERSE LENGTH=490 | 201606	16	16	0.00125474	0.0931708	0.000202724	1	3.0619	2.07091	2.29771	1.81441	2.05606	0.8518	1	1.49282	1.81074	1.56348	1.06462	2.07215	1.94048	1	2.12291	1.57092	1.8803	1.21792	1.86715	0.972771
AT1G72170.1	10752	| MICOS complex subunit%2C putative (DUF543) | Chr1:27156403-27157516 FORWARD LENGTH=102 | 201606	5	3	0.86484	0.89712	0.282324	1	0.993895	0.91491	1.05156	0.804306	0.915759	0.898824	1	1.059	1.02897	0.967874	1.13799	1.09649	1.28986	1	1.36679	1.03115	1.06963	0.850557	0.820426	1.14881
AT1G72330.1	59511	| alanine aminotransferase 2 | Chr1:27233637-27236571 FORWARD LENGTH=540 | 201606	25	9	0.0824089	0.000114026	0.00978039	1	1.05493	0.812131	0.887395	1.13554	1.02815	1.38444	1	1.52848	1.15083	2.00439	2.52625	1.48818	1.8692	1	1.63958	1.18624	1.80123	1.62849	2.04173	1.90141
AT1G72370.1	32291	| 40s ribosomal protein SA | Chr1:27243148-27244842 REVERSE LENGTH=298 | 201606	28	28	0.00192744	0.0122345	0.00022366	1	0.921772	0.919263	0.847912	0.922408	0.806356	0.677434	1	0.881318	0.8391	0.836758	0.988843	0.73782	0.705977	1	1.06731	0.920347	1.0085	0.959707	0.726946	0.811672
AT1G72520.1	104814	| PLAT/LH2 domain-containing lipoxygenase family protein | Chr1:27308611-27312589 FORWARD LENGTH=926 | 201606	3	1	0.485929	2.41537e-06	1.55068e-07	1	0.887847	0.866903	0.891703	0.99196	3.41777	0.903238	1	0.921884	0.846091	0.838015	0.825627	13.4512	0.793008	1	0.965456	0.967021	0.948178	24.1158	14.5135	0.928317
AT1G72550.1	67543	| tRNA synthetase beta subunit family protein | Chr1:27319947-27323908 REVERSE LENGTH=598 | 201606	13	13	0.00461624	0.800726	0.0108198	1	1.07033	0.835966	0.827269	1.0864	0.891387	0.403692	1	1.22355	1.05674	0.97913	1.00359	0.942575	0.987544	1	1.2139	0.838897	0.973227	0.788147	0.643966	0.718245
AT1G72610.1	21559	| germin-like protein 1 | Chr1:27339302-27339928 REVERSE LENGTH=208 | 201606	24	24	0.0646182	0.000413209	0.00457125	1	1.5628	1.5776	1.23147	1.19415	1.47558	1.61682	1	1.61441	1.36689	1.13474	1.03773	1.32701	1.71202	1	1.51048	0.836308	0.886588	1.29431	1.65364	1.25666
AT1G72640.1	33635	| NAD(P)-binding Rossmann-fold superfamily protein | Chr1:27346409-27348147 REVERSE LENGTH=312 | 201606	12	12	0.613867	0.00147154	0.0679866	1	0.861902	0.642362	0.891167	0.895998	1.05087	0.904639	1	0.619134	0.524278	0.609651	0.456999	0.955269	0.811567	1	1.27518	0.868617	0.745628	0.778605	0.774081	1.12903
AT1G72680.1	38671	| cinnamyl-alcohol dehydrogenase | Chr1:27359346-27360876 REVERSE LENGTH=355 | 201606	13	13	0.234766	4.63489e-05	6.62341e-05	1	2.82406	2.55263	2.1831	1.67957	3.5747	3.31729	1	1.87623	2.21573	5.2686	5.44403	6.85243	6.57991	1	1.7807	2.39498	4.41908	4.48835	7.14203	4.34723
AT1G72710.1	51879	| casein kinase 1-like protein 2 | Chr1:27372553-27376178 FORWARD LENGTH=465 | 201606	5	3	0.00168554	0.230511	0.0290024	1	11.875	26.1377	6.17376	10.0369	28.8543	0.903238	1	0.267271	0.626359	0.828718	1.97037	1.6026	0.839366	1	1.72117	6.32347	7.24574	2.29252	6.59781	2.44128
AT1G72730.1	46771	| DEA(D/H)-box RNA helicase family protein | Chr1:27378040-27379593 REVERSE LENGTH=414 | 201606	31	2	0.000469242	1.05365e-05	0.0230803	1	0.793089	0.963663	0.866978	1.02009	0.71089	0.482408	1	0.969398	1.18338	0.942345	1.32852	0.865799	0.750902	1	1.17	1.09038	1.04321	1.276	1.32872	0.801865
AT1G72750.1	19878	| translocase inner membrane subunit 23-2 | Chr1:27383577-27384143 FORWARD LENGTH=188 | 201606	3	3	0.152236	0.899043	0.459989	1	1.22855	1.09074	1.79284	1.26378	0.539093	0.804281	1	1.08354	1.50539	1.50059	1.73362	1.42514	1.70816	1	1.13243	1.10527	0.953371	0.907719	1.8893	1.39778
AT1G72810.1	56925	| Pyridoxal-5'-phosphate-dependent enzyme family protein | Chr1:27398760-27400393 REVERSE LENGTH=516 | 201606	10	4	0.00134437	0.0609885	0.219826	1	1.33695	2.10014	1.41245	0.578202	1.21415	1.81207	1	1.86866	2.7201	2.11933	1.39821	2.876	3.34913	1	0.526773	0.551951	0.646682	0.8627	0.791283	0.759366
AT1G72880.1	40674	| Survival protein SurE-like phosphatase/nucleotidase | Chr1:27423678-27425928 REVERSE LENGTH=385 | 201606	4	4	0.00946467	0.162457	0.395823	1	0.586273	0.719271	0.595961	0.667138	1.1475	1.95063	1	0.572773	0.851987	0.420405	0.310064	0.604588	0.900262	1	1.15964	1.31876	0.958117	1.64125	1.217	1.863
AT1G72930.1	20245	| toll/interleukin-1 receptor-like protein | Chr1:27439476-27440147 FORWARD LENGTH=176 | 201606	11	11	0.000193838	9.28749e-06	3.52301e-05	1	1.18727	1.4473	1.10346	1.12999	0.738856	0.561256	1	0.662164	1.38007	1.1609	2.10254	0.774104	0.416379	1	0.413325	0.548698	1.29301	1.77527	1.23887	0.959805
AT1G72970.1	65344	| Glucose-methanol-choline (GMC) oxidoreductase family protein | Chr1:27452872-27455706 FORWARD LENGTH=594 | 201606	2	2	0.00732495	1.96246e-06	1.9328e-05	1	2.09695	0.123978	0.127525	0.141863	0.12336	0.129174	1	5.16061	0.203521	0.201578	0.198598	0.194114	0.190752	1	2.46418	0.0926646	0.090859	0.0865783	0.0833391	0.0889558
AT1G72970.2	62210	| Glucose-methanol-choline (GMC) oxidoreductase family protein | Chr1:27452872-27455706 FORWARD LENGTH=567 | 201606	2	2	0.00732495	0.000591422	1.9328e-05	1	2.09695	0.123978	0.127525	0.141863	0.12336	0.129174	1	5.16061	1.52082	0.201578	0.198598	0.194114	0.190752	1	2.46418	0.0926646	0.090859	0.0865783	0.0833391	0.0889558
AT1G73030.1	22691	| SNF7 family protein | Chr1:27473938-27474848 FORWARD LENGTH=203 | 201606	3	2	0.258724	0.0763449	0.134805	1	0.695183	1.08237	1.55311	1.9668	0.888733	0.698099	1	1.07488	0.17421	0.99822	1.23218	0.295605	0.678069	1	3.54022	1.63495	2.52978	0.924605	1.74931	1.86125
AT1G73060.1	40029	| Low PSII Accumulation 3 | Chr1:27479027-27481258 FORWARD LENGTH=358 | 201606	20	20	0.00103444	0.000351974	0.553654	1	1.44856	0.855032	0.997534	1.12981	1.37604	0.568338	1	1.10971	0.569237	0.90712	0.710497	0.998946	0.830324	1	1.15993	0.95123	0.991167	0.891179	0.979464	0.864324
AT1G73110.1	48325	| P-loop containing nucleoside triphosphate hydrolases superfamily protein | Chr1:27494344-27496844 REVERSE LENGTH=432 | 201606	19	16	0.00312677	2.09192e-05	0.00246915	1	1.56709	1.36217	1.80726	1.97564	0.963468	1.69862	1	1.32927	0.843044	1.39512	0.732111	0.626521	0.441764	1	0.761481	0.87555	0.869665	0.6562	0.325076	0.579352
AT1G73170.1	73735	| P-loop containing nucleoside triphosphate hydrolases superfamily protein | Chr1:27511722-27514783 REVERSE LENGTH=666 | 201606	4	4	0.000342298	5.12356e-05	0.164635	1	9.18416	0.866903	0.891703	3.91189	19.9234	24.0839	1	1.51252	0.0828276	0.082037	0.0808243	2.36154	2.58074	1	0.949742	0.0923002	0.0905017	0.862378	0.33901	1.77653
AT1G73170.3	74247	| P-loop containing nucleoside triphosphate hydrolases superfamily protein | Chr1:27511346-27514783 REVERSE LENGTH=671 | 201606	4	4	0.000796185	5.12356e-05	0.164635	1	9.18416	0.866903	3.63496	3.91189	19.9234	24.0839	1	1.51252	0.0828276	0.082037	0.0808243	2.36154	2.58074	1	0.949742	0.0923002	0.0905017	0.862378	0.33901	1.77653
AT1G73180.1	56298	| Eukaryotic translation initiation factor eIF2A family protein | Chr1:27518335-27521432 FORWARD LENGTH=513 | 201606	7	7	0.232209	0.401191	0.0346521	1	0.334476	0.788185	0.175319	0.287937	0.244121	0.66207	1	0.523659	0.561483	0.476019	0.603341	0.16152	0.302224	1	1.76141	0.341703	0.786254	1.64877	0.58194	1.08074
AT1G73180.2	53579	| Eukaryotic translation initiation factor eIF2A family protein | Chr1:27518335-27521014 FORWARD LENGTH=484 | 201606	6	6	0.421609	1.28945e-08	1.27958e-06	1	12.1671	0.866903	0.891703	0.99196	8.8803	0.903238	1	18.4377	0.846091	0.838015	0.825627	5.68701	0.793008	1	35.3442	0.967021	0.948178	0.903506	11.6771	0.928317
AT1G73230.1	18004	| Nascent polypeptide-associated complex NAC | Chr1:27540506-27541364 REVERSE LENGTH=165 | 201606	11	10	0.0246412	0.000745626	0.428376	1	1.26915	1.50777	1.35676	1.11184	0.796169	1.50544	1	1.68361	1.83906	1.41624	1.42031	1.08353	1.31843	1	1.07488	0.955917	1.042	0.870956	0.87091	1.01631
AT1G73250.1	35570	| GDP-4-keto-6-deoxymannose-3%2C5-epimerase-4-reductase 1 | Chr1:27545213-27546360 REVERSE LENGTH=323 | 201606	6	4	0.909041	0.137815	0.184829	1	0.981863	1.05563	0.884205	0.869491	0.763379	0.897463	1	1.39305	0.84493	0.846532	1.41644	0.710878	0.698857	1	1.08115	0.954271	1.7733	1.12819	1.07489	0.690549
AT1G73260.1	23793	| kunitz trypsin inhibitor 1 | Chr1:27547410-27548057 REVERSE LENGTH=215 | 201606	17	17	1.91932e-05	1.23015e-06	5.47345e-12	1	0.887847	0.866903	0.891703	0.99196	0.862579	0.903238	1	0.921884	0.846091	8.99931	89.4142	8.06983	118.883	1	0.965456	0.967021	123.374	51.3317	640.468	216.98
AT1G73600.1	56368	| S-adenosyl-L-methionine-dependent methyltransferases superfamily protein | Chr1:27670825-27673400 FORWARD LENGTH=490 | 201606	15	9	4.93683e-09	4.58184e-07	2.44606e-06	1	0.887847	167.699	0.891703	204.607	171.985	126.518	1	0.921884	113.177	0.838015	53.9684	110.28	68.4218	1	0.965456	88.9419	0.948178	78.37	101.959	80.4922
AT1G73600.2	57844	| S-adenosyl-L-methionine-dependent methyltransferases superfamily protein | Chr1:27669224-27673400 FORWARD LENGTH=504 | 201606	15	10	0.030631	4.39803e-06	1.20451e-05	1	0.865891	0.96403	1.23002	1.17619	0.988663	0.727294	1	0.436782	0.505487	0.524615	0.241042	0.492551	0.305596	1	0.504973	0.410336	0.408734	0.361562	0.470392	0.371353
AT1G73650.1	23731	| 3-oxo-5-alpha-steroid 4-dehydrogenase (DUF1295) | Chr1:27688449-27689606 REVERSE LENGTH=208 | 201606	4	4	0.231959	0.052522	0.18258	1	2.14713	0.501861	0.891761	2.37008	1.30687	0.912944	1	0.594711	0.041224	0.408305	0.528155	0.919567	1.15515	1	0.0965456	1.62141	1.85916	1.23903	2.87396	1.54639
AT1G73670.1	65251	| MAP kinase 15 | Chr1:27700212-27703168 FORWARD LENGTH=576 | 201606	5	1	0.00126223	0.00979165	0.00466458	1	1.3931	0.493328	0.038202	0.567121	0.97983	0.644301	1	0.838885	0.687434	0.025603	0.916703	0.576621	0.495723	1	0.677085	0.859465	0.0285013	1.08634	0.689046	0.928633
AT1G73750.1	49683	| alpha/beta hydrolase family protein | Chr1:27736659-27738887 FORWARD LENGTH=452 | 201606	4	4	0.000817715	7.61907e-08	1.57694e-05	1	3.58472	0.866903	0.891703	0.99196	31.4674	6.32042	1	0.921884	0.846091	5.8136	0.825627	40.2586	66.2262	1	0.965456	0.967021	12.5184	0.903506	66.2093	21.6397
AT1G73750.2	51517	| alpha/beta hydrolase family protein | Chr1:27736659-27738852 FORWARD LENGTH=468 | 201606	3	3	0.111851	1.45244e-10	4.94351e-07	1	3.58472	0.866903	0.891703	0.99196	0.862579	6.32042	1	0.921884	0.846091	5.8136	0.825627	0.806983	66.2262	1	0.965456	0.967021	12.5184	0.903506	0.869703	21.6397
AT1G73880.1	52106	| UDP-glucosyl transferase 89B1 | Chr1:27785143-27786564 FORWARD LENGTH=473 | 201606	2	2	0.103147	0.0404567	0.0390687	1	6.1816	9.03312	0.891703	0.99196	6.0706	0.903238	1	3.63662	5.89805	0.838015	8.12158	13.4512	5.54155	1	19.3091	15.479	0.948178	9.03506	14.5135	3.69431
AT1G73990.1	75095	| signal peptide peptidase | Chr1:27824465-27828807 FORWARD LENGTH=677 | 201606	16	16	2.85268e-05	0.00129027	0.00341238	1	0.724489	1.51653	1.10985	1.29868	2.37266	0.226271	1	0.522063	1.12064	0.793874	1.43851	1.72251	1.01689	1	0.927496	1.46546	0.979116	0.762945	1.60192	0.819344
AT1G74010.1	34184	| Calcium-dependent phosphotriesterase superfamily protein | Chr1:27832432-27834017 REVERSE LENGTH=325 | 201606	10	6	1.91932e-05	1.88948e-07	3.89441e-11	1	0.887847	0.866903	0.891703	0.99196	0.862579	0.903238	1	0.921884	0.846091	8.69904	65.2451	13.365	52.6433	1	0.965456	0.967021	10.0465	30.1615	138.965	37.1497
AT1G74020.1	35293	| strictosidine synthase 2 | Chr1:27835289-27837277 REVERSE LENGTH=335 | 201606	12	10	0.00936725	3.92391e-10	8.75958e-08	1	5.29861	3.72874	4.57167	3.36201	14.0007	6.15089	1	1.4624	2.42364	6.12191	17.3018	8.21881	14.8749	1	3.21797	3.73378	11.0484	9.31332	28.6737	10.8405
AT1G74030.1	51475	| enolase 1 | Chr1:27839465-27841901 REVERSE LENGTH=477 | 201606	9	7	0.306808	0.168598	0.142635	1	1.45316	0.940392	1.2861	0.721772	1.3952	1.39378	1	1.47444	1.97261	1.70496	1.51129	1.6441	2.29618	1	2.16069	2.10872	1.38221	1.21173	1.06314	2.07784
AT1G74040.1	68136	| 2-isopropylmalate synthase 1 | Chr1:27842258-27845566 FORWARD LENGTH=631 | 201606	18	5	7.64675e-06	1.18943e-05	1.83201e-05	1	0.572437	0.393523	0.584015	0.755606	0.241313	0.491763	1	0.670456	0.348803	0.441678	0.396431	0.290425	0.334832	1	0.393614	0.280397	0.463516	0.477893	0.32279	0.482794
AT1G74050.1	26107	| Ribosomal protein L6 family protein | Chr1:27847256-27848680 REVERSE LENGTH=233 | 201606	19	8	8.1113e-07	2.75433e-07	4.82238e-07	1	0.00513714	0.00501595	0.00515944	0.71862	0.60022	0.22674	1	0.00534131	0.00490217	0.00485537	0.739737	0.841866	0.599037	1	0.00558682	0.00559588	0.00548684	0.731411	0.751007	0.536825
AT1G74060.1	26009	| Ribosomal protein L6 family protein | Chr1:27850033-27851299 REVERSE LENGTH=233 | 201606	22	6	1.01049e-05	5.17077e-09	0.00224475	1	1.11385	1.00542	0.979364	0.71862	0.00499093	0.00522619	1	0.586052	1.17544	0.743886	0.739737	0.00467558	0.00459461	1	1.00645	0.949136	0.706152	0.731411	0.00503273	0.00537191
AT1G74070.1	34375	| Cyclophilin-like peptidyl-prolyl cis-trans isomerase family protein | Chr1:27851749-27852861 REVERSE LENGTH=317 | 201606	13	13	0.972109	0.164817	0.170729	1	0.976159	0.86735	1.0096	1.02176	1.00408	1.08561	1	1.23584	0.702554	0.870515	0.706629	0.863548	0.929136	1	1.33194	0.872114	0.714244	0.850218	1.09504	0.954995
AT1G74070.2	30374	| Cyclophilin-like peptidyl-prolyl cis-trans isomerase family protein | Chr1:27851940-27852861 REVERSE LENGTH=280 | 201606	12	12	4.92316e-15	8.62919e-08	0.000618312	1	0.887847	0.866903	100.908	0.99196	0.862579	0.903238	1	0.921884	0.846091	84.0139	0.825627	0.806983	0.793008	1	0.965456	0.967021	81.0728	0.903506	0.869703	0.928317
AT1G74090.1	40465	| desulfo-glucosinolate sulfotransferase 18 | Chr1:27863003-27864055 FORWARD LENGTH=350 | 201606	18	16	0.00485726	0.000314243	2.4622e-06	1	0.785055	0.568718	0.96509	0.96316	0.808085	1.39156	1	0.814463	0.586241	0.699492	0.745907	0.894445	1.53724	1	0.377998	0.45165	0.370207	0.564439	0.467739	0.646686
AT1G74100.1	39219	| sulfotransferase 16 | Chr1:27864489-27865505 REVERSE LENGTH=338 | 201606	26	24	6.51045e-05	5.27704e-07	5.70082e-06	1	1.01532	1.21793	1.34509	1.20754	1.30208	1.95246	1	1.32026	1.83385	1.90411	2.69732	1.96466	2.55855	1	1.17793	1.48769	1.71723	1.72576	1.65148	1.95167
AT1G74210.1	45021	| PLC-like phosphodiesterases superfamily protein | Chr1:27910396-27912785 FORWARD LENGTH=392 | 201606	5	5	2.23829e-06	0.000141333	1.62516e-05	1	0.887847	6.03597	17.9949	7.03895	31.5262	33.1361	1	0.921884	11.7329	31.0814	27.2841	48.2466	102.841	1	0.965456	9.6066	28.4454	15.2248	75.8238	61.8797
AT1G74230.1	28728	| glycine-rich RNA-binding protein 5 | Chr1:27915346-27916857 FORWARD LENGTH=289 | 201606	9	9	0.14615	0.0423321	0.0119527	1	1.72901	3.03102	2.95048	2.50573	2.51573	2.62699	1	0.8301	1.06986	1.66315	1.38329	1.09516	1.57711	1	0.772205	1.26925	1.41271	1.35749	1.73906	2.04809
AT1G74260.1	153953	| purine biosynthesis 4 | Chr1:27923005-27927764 REVERSE LENGTH=1407 | 201606	54	54	3.99736e-05	0.0136121	0.00721689	1	0.886957	0.892388	0.990103	0.885212	0.82785	0.565644	1	0.871975	0.837962	0.79169	0.71498	0.7168	0.646669	1	0.889907	0.72203	0.735224	0.794046	0.72801	0.664553
AT1G74270.1	12916	| Ribosomal protein L35Ae family protein | Chr1:27928415-27929466 REVERSE LENGTH=112 | 201606	6	4	9.50242e-08	6.46557e-06	1.5299e-07	1	103.434	81.0036	0.891703	0.99196	63.0229	30.1104	1	64.3329	67.5013	0.838015	0.825627	53.9274	60.3601	1	90.1651	50.8058	0.948178	0.903506	89.4751	46.3867
AT1G74310.1	101295	| heat shock protein 101 | Chr1:27936715-27939862 REVERSE LENGTH=911 | 201606	20	17	9.72582e-09	4.06254e-10	2.01023e-06	1	0.887847	0.866903	0.891703	23.0836	0.862579	0.903238	1	0.921884	0.846091	0.838015	133.211	0.806983	0.793008	1	0.965456	0.967021	0.948178	30.1907	0.869703	0.928317
AT1G74470.1	51838	| Pyridine nucleotide-disulfide oxidoreductase family protein | Chr1:27991248-27992845 FORWARD LENGTH=467 | 201606	54	54	3.65716e-08	2.62606e-07	2.43978e-06	1	0.646336	0.795774	0.833711	0.647473	0.462943	0.765116	1	0.837222	0.891904	0.67037	0.517788	0.492509	0.454443	1	0.790999	0.672244	0.628106	0.685313	0.498638	0.67533
AT1G74590.1	26805	| glutathione S-transferase TAU 10 | Chr1:28023887-28024666 REVERSE LENGTH=232 | 201606	5	5	1.91932e-05	1.09423e-08	1.51763e-07	1	0.887847	0.866903	0.891703	0.99196	0.862579	0.903238	1	0.921884	0.846091	0.838015	43.4968	8.38395	7.93008	1	0.965456	0.967021	22.1111	18.0555	115.456	3.70963
AT1G74640.1	41058	| alpha/beta-Hydrolases superfamily protein | Chr1:28032849-28034659 FORWARD LENGTH=370 | 201606	15	15	0.0924507	0.00195605	0.0181917	1	1.07579	0.893032	1.12511	1.31355	0.891134	1.33263	1	1.21283	0.948481	1.26166	1.06519	0.84265	0.611381	1	0.742482	0.693918	0.848613	0.946374	0.779991	0.57057
AT1G74690.1	65200	| IQ-domain 31 | Chr1:28061498-28063924 REVERSE LENGTH=587 | 201606	4	4	5.3435e-05	0.0117357	0.0661788	1	1.59934	2.59726	0.741271	0.232474	0.203582	0.380489	1	1.36516	3.3154	1.22468	0.469484	1.56625	0.115891	1	1.10714	0.343893	0.0467781	0.456872	0.0429066	0.764343
AT1G74730.1	20735	| transmembrane protein%2C putative (DUF1118) | Chr1:28078995-28079831 FORWARD LENGTH=198 | 201606	7	7	0.000154129	0.0138228	0.00543861	1	0.478281	0.591384	0.415434	0.857927	0.219228	0.194172	1	1.01391	0.668511	0.487244	0.596658	0.431776	0.250522	1	0.346625	0.649471	0.510751	0.419036	0.372651	0.266392
AT1G74740.1	61405	| calcium-dependent protein kinase 30 | Chr1:28080199-28082476 REVERSE LENGTH=541 | 201606	3	1	0.000115518	7.1982e-06	6.69097e-10	1	0.887847	0.866903	0.891703	13.3941	0.862579	0.903238	1	0.921884	0.846091	0.838015	13.8604	0.806983	0.793008	1	0.965456	0.967021	0.948178	30.1761	0.869703	0.928317
AT1G74850.1	96326	| plastid transcriptionally active 2 | Chr1:28119237-28122314 REVERSE LENGTH=862 | 201606	8	8	0.0191875	0.00120465	0.0562782	1	0.549589	0.935331	0.619685	0.535178	0.461039	0.0209015	1	0.409425	0.736442	0.569468	0.407484	0.301631	0.014858	1	0.479893	0.545878	0.601985	0.899479	0.37526	0.0198002
AT1G74880.1	17657	| NAD(P)H:plastoquinone dehydrogenase complex subunit O | Chr1:28130112-28131020 REVERSE LENGTH=158 | 201606	7	7	0.192314	0.0070637	0.140138	1	1.12323	0.919842	0.968584	0.933961	1.11613	1.38643	1	0.826543	0.547945	0.650915	0.581623	0.658267	0.648692	1	0.94228	0.836245	0.948853	0.746611	0.978798	0.883343
AT1G74910.1	45564	| ADP-glucose pyrophosphorylase family protein | Chr1:28135770-28138456 REVERSE LENGTH=415 | 201606	21	21	3.8747e-05	0.00338903	0.0116578	1	0.97958	0.902774	1.28559	1.11383	0.677077	0.498211	1	1.21968	0.846195	1.09109	0.811757	0.683004	0.59478	1	1.46475	1.05609	1.55127	1.00835	0.907853	0.968904
AT1G74910.3	42897	| ADP-glucose pyrophosphorylase family protein | Chr1:28135852-28138456 REVERSE LENGTH=387 | 201606	22	22	6.72054e-10	4.88344e-07	1.84121e-07	1	153.735	141.681	201.76	174.804	0.862579	78.1892	1	206.399	143.196	184.638	137.368	0.806983	100.65	1	205.672	148.291	217.82	141.586	0.869703	136.048
AT1G74920.1	54432	| aldehyde dehydrogenase 10A8 | Chr1:28139175-28142573 REVERSE LENGTH=501 | 201606	25	25	0.00533459	0.1038	0.051864	1	1.04397	1.05608	1.38181	1.19075	0.968629	1.38743	1	1.30731	1.03041	1.19564	1.31522	1.16084	1.48245	1	1.1342	0.955376	1.1555	0.923681	0.953942	1.24467
AT1G74960.1	57600	| fatty acid biosynthesis 1 | Chr1:28152564-28155948 REVERSE LENGTH=541 | 201606	17	16	0.0239652	0.230174	0.770456	1	1.73323	1.69278	1.73866	1.36887	1.56908	1.84026	1	0.871643	1.05836	1.22074	0.918637	1.0356	0.927393	1	0.824109	1.01252	1.08819	0.925258	0.931051	1.08649
AT1G74970.1	22577	| ribosomal protein S9 | Chr1:28157761-28159202 REVERSE LENGTH=208 | 201606	13	13	0.00144375	0.00100488	0.000219673	1	0.887266	0.781598	0.876348	0.832891	0.554849	0.537908	1	1.16215	0.777093	0.582386	0.730814	0.681051	0.474536	1	1.05847	0.425763	0.618453	0.7128	0.517922	0.695489
AT1G75040.1	25252	| pathogenesis-related protein 5 | Chr1:28177754-28178731 FORWARD LENGTH=239 | 201606	16	16	8.33576e-07	2.87782e-06	1.42201e-08	1	0.780449	1.87717	1.35057	1.70255	2.16671	3.48098	1	1.12188	2.64222	1.8733	2.5194	2.00632	3.03512	1	1.90647	1.18817	1.89214	1.24974	4.66931	3.73327
AT1G75100.1	71602	| J-domain protein required for chloroplast accumulation response 1 | Chr1:28191108-28193769 REVERSE LENGTH=651 | 201606	4	4	0.0310089	0.00302009	0.745355	1	1.38487	1.52062	1.03927	0.0581134	0.52352	1.76661	1	2.69449	2.47296	2.84601	0.460483	3.12588	4.22854	1	0.602013	0.588523	0.487948	0.672922	0.755131	0.694534
AT1G75210.1	74314	| HAD-superfamily hydrolase%2C subfamily IG%2C 5'-nucleotidase | Chr1:28223990-28228751 FORWARD LENGTH=642 | 201606	5	5	3.8259e-05	0.0071348	0.000620057	1	35.3118	0.866903	0.891703	23.0399	31.3589	0.903238	1	9.21884	0.846091	0.838015	16.5125	16.1353	10.5023	1	12.9028	0.967021	0.948178	18.0701	22.9673	3.69431
AT1G75210.2	62535	| HAD-superfamily hydrolase%2C subfamily IG%2C 5'-nucleotidase | Chr1:28225027-28228751 FORWARD LENGTH=539 | 201606	5	5	0.00750772	0.0063683	0.525074	1	1.17007	1.53395	1.07867	0.763434	1.03909	0.0299291	1	0.398746	1.58702	1.55971	0.714224	0.697907	0.454262	1	0.772135	1.12832	1.30756	1.08136	1.37442	0.221077
AT1G75220.1	52901	| Major facilitator superfamily protein | Chr1:28229412-28232606 REVERSE LENGTH=487 | 201606	5	3	0.000116489	0.841989	0.0817459	1	2.09378	2.03926	1.0502	1.17623	1.58909	0.182955	1	0.917745	0.838346	0.930153	0.809078	1.1042	0.690616	1	0.823262	1.21205	1.19534	1.79339	0.977926	0.288159
AT1G75270.1	23407	| dehydroascorbate reductase 2 | Chr1:28250255-28251237 REVERSE LENGTH=213 | 201606	11	9	0.425692	0.42415	0.0182195	1	0.931298	0.956059	0.743483	0.824594	0.994686	1.13908	1	1.07936	0.853281	1.26371	1.20439	0.991158	1.50966	1	1.47976	1.59448	1.394	1.68846	1.62466	1.79594
AT1G75280.1	33737	| NmrA-like negative transcriptional regulator family protein | Chr1:28252030-28253355 FORWARD LENGTH=310 | 201606	20	19	0.0554278	0.0033456	0.00315393	1	1.08428	0.777199	0.935088	1.18779	1.26938	1.05686	1	0.869939	0.648084	0.726493	0.590751	0.905044	1.04425	1	0.861316	0.752396	0.692177	0.64471	0.666944	0.894781
AT1G75300.1	35619	| NmrA-like negative transcriptional regulator family protein | Chr1:28255552-28256927 FORWARD LENGTH=322 | 201606	3	1	1.72307e-07	6.43706e-05	1.84928e-23	1	0.887847	0.866903	0.891703	0.99196	22.871	27.0972	1	0.921884	0.846091	0.838015	0.825627	35.0949	26.3125	1	0.965456	0.967021	0.948178	0.903506	26.0911	27.8495
AT1G75330.1	41002	| ornithine carbamoyltransferase | Chr1:28266457-28268383 REVERSE LENGTH=375 | 201606	21	21	5.57849e-05	0.0223852	0.39088	1	0.899943	0.669319	0.832493	1.17469	0.94325	1.07086	1	0.890719	0.511423	0.774885	0.766535	0.91369	0.962103	1	1.15362	0.986916	0.839566	0.928934	1.03825	1.21786
AT1G75350.1	16033	| Ribosomal protein L31 | Chr1:28272163-28272687 FORWARD LENGTH=144 | 201606	21	21	0.0179567	0.000163184	0.00208008	1	0.816999	0.998864	0.880475	0.533851	0.516361	1.19973	1	1.06285	1.19372	0.928611	0.418385	0.710933	0.747833	1	0.730727	0.551961	0.577678	0.683066	0.469793	0.738506
AT1G75460.1	31336	| ATP-dependent protease La (LON) domain protein | Chr1:28327986-28328822 FORWARD LENGTH=278 | 201606	4	3	0.00524339	0.00295132	7.93427e-07	1	0.37774	0.531733	0.3771	0.323485	0.124596	0.170549	1	0.493811	0.586998	0.521737	0.313888	0.43898	0.128922	1	0.34368	0.149161	0.746607	0.450643	0.186104	0.138569
AT1G75510.1	29711	| Transcription initiation factor IIF%2C beta subunit | Chr1:28347254-28348629 REVERSE LENGTH=261 | 201606	3	3	2.83782e-06	0.0345999	0.00265754	1	1.66146	1.62541	1.66622	0.140018	2.01491	5.09981	1	3.68408	6.86338	2.70174	6.57944	10.9675	6.29761	1	0.385991	0.947985	1.25184	2.71867	2.32105	2.78033
AT1G75630.1	16686	| vacuolar H+-pumping ATPase 16 kDa proteolipid subunit 4 | Chr1:28400662-28402032 FORWARD LENGTH=166 | 201606	4	4	3.5257e-05	8.0999e-07	9.97969e-05	1	0.883234	0.0144299	0.848321	0.0165115	0.0143579	0.0150347	1	0.640055	0.0195604	1.09563	0.0190873	0.0186563	0.0183332	1	1.36346	0.0292212	2.18579	0.0273019	0.0262805	0.0280516
AT1G75660.1	116826	| 5'-3' exoribonuclease 3 | Chr1:28408289-28414825 FORWARD LENGTH=1020 | 201606	3	3	0.0283667	0.21236	0.60904	1	0.715767	0.870911	0.537778	0.235923	0.691438	0.216953	1	0.361031	1.69218	1.11944	0.553788	1.65315	1.08177	1	1.205	0.709821	0.945642	1.79132	1.51148	1.39019
AT1G75680.1	57868	| glycosyl hydrolase 9B7 | Chr1:28417215-28419231 REVERSE LENGTH=525 | 201606	5	5	0.000486201	0.0274014	0.130688	1	9.39482	2.9333	0.218722	2.502	0.211578	0.221551	1	0.361031	1.15113	0.0838015	0.0825627	0.326737	0.0793008	1	0.955381	0.751084	0.0564931	0.0538315	0.0518175	0.0553098
AT1G75690.1	16334	| DnaJ/Hsp40 cysteine-rich domain superfamily protein | Chr1:28422273-28423170 REVERSE LENGTH=154 | 201606	2	2	4.91655e-07	7.88282e-09	6.65834e-07	1	0.887847	0.866903	0.891703	0.99196	25.7395	0.903238	1	0.921884	0.846091	0.838015	0.825627	21.5619	0.793008	1	0.965456	0.967021	0.948178	0.903506	26.0469	0.928317
AT1G75750.1	10745	| GAST1 protein homolog 1 | Chr1:28441813-28442284 REVERSE LENGTH=98 | 201606	4	4	0.00867922	0.0106067	0.00284165	1	10.8136	2.93529	4.37443	0.949892	4.19053	0.221551	1	4.80691	5.92755	13.2415	2.8475	5.656	0.208269	1	64.4239	18.6053	24.6649	12.0098	20.9452	0.928317
AT1G75750.2	10646	| GAST1 protein homolog 1 | Chr1:28441813-28442284 REVERSE LENGTH=97 | 201606	4	4	0.0194131	0.0290535	0.00727096	1	10.8136	2.93529	4.37443	0.949892	4.19053	2.2867	1	4.80691	5.92755	13.2415	2.8475	5.656	3.4767	1	64.4239	18.6053	24.6649	12.0098	20.9452	18.5834
AT1G75780.1	50217	| tubulin beta-1 chain | Chr1:28451378-28453602 REVERSE LENGTH=447 | 201606	31	1	2.32558e-10	3.71101e-10	3.42259e-09	1	0.887847	450.869	591.145	0.99196	453.34	0.903238	1	0.921884	473.902	623.87	0.825627	468.291	0.793008	1	0.965456	450.791	512.262	0.903506	483.523	0.928317
AT1G75850.1	89445	| VPS35 homolog B | Chr1:28478053-28483874 REVERSE LENGTH=790 | 201606	4	4	0.771984	0.000736401	6.73278e-05	1	1.34859	1.74725	1.34704	1.73172	2.14596	1.59057	1	1.49018	3.60668	2.17827	3.4859	4.48077	3.62974	1	0.64514	2.26124	1.42227	1.80701	2.75369	2.62898
AT1G75850.2	62612	| VPS35 homolog B | Chr1:28478053-28482517 REVERSE LENGTH=557 | 201606	2	2	4.82742e-05	0.00318698	5.17532e-10	1	1.34859	0.0654787	1.34704	0.0749245	0.0651521	0.0682232	1	1.49018	0.0828276	2.17827	0.0808243	0.0789992	0.0776311	1	0.64514	0.0483511	1.42227	0.0451753	0.0434852	0.0464159
AT1G75950.1	17857	| S phase kinase-associated protein 1 | Chr1:28516715-28517454 FORWARD LENGTH=160 | 201606	6	5	0.424379	0.416037	0.117908	1	2.13003	0.873994	1.42381	1.58518	1.03998	1.4486	1	0.593439	0.535778	1.80158	0.765836	0.72454	1.01326	1	0.036116	0.473953	1.05543	0.564143	1.40912	1.16304
AT1G75990.1	55591	| PAM domain (PCI/PINT associated module) protein | Chr1:28524623-28526718 REVERSE LENGTH=487 | 201606	18	5	7.49488e-05	0.0157276	0.0039866	1	0.886617	0.766428	0.787086	0.872262	0.610745	0.242801	1	0.794491	0.94303	0.767309	1.01826	0.773055	0.588097	1	1.30075	1.17472	1.21529	0.900984	1.1131	0.605343
AT1G76010.1	37383	| Alba DNA/RNA-binding protein | Chr1:28528505-28530488 REVERSE LENGTH=350 | 201606	9	8	0.000206312	0.561369	0.032396	1	1.8564	1.69174	1.14064	0.812803	1.39585	0.0727669	1	0.72776	0.965614	0.747792	0.962043	0.77165	0.520233	1	1.44524	1.43904	1.41813	1.79904	1.55023	0.264168
AT1G76020.1	25255	| Thioredoxin superfamily protein | Chr1:28532243-28533542 REVERSE LENGTH=225 | 201606	4	4	0.00372828	0.0104994	0.386266	1	1.3285	0.776097	0.886934	1.27914	1.81096	1.4443	1	0.929916	0.524892	0.910939	0.949634	1.44532	1.29379	1	1.04155	0.813054	1.18041	1.04747	1.29323	1.38568
AT1G76020.3	19998	| Thioredoxin superfamily protein | Chr1:28532661-28533542 REVERSE LENGTH=178 | 201606	3	3	1.47125e-06	6.95803e-08	1.34563e-05	1	1.3285	0.776097	0.0267443	0.0297512	0.0258708	0.0270903	1	0.929916	0.524892	0.0195493	0.0192603	0.0188254	0.0184994	1	1.04155	0.813054	0.0235887	0.0224773	0.0216364	0.0230946
AT1G76030.1	54108	| ATPase%2C V1 complex%2C subunit B protein | Chr1:28534134-28536916 FORWARD LENGTH=486 | 201606	80	4	8.13443e-06	0.000779906	3.13419e-05	1	1.40873	1.31774	1.38547	1.37465	1.68069	1.59114	1	1.12633	1.08841	1.23831	1.29933	1.44402	1.46529	1	0.863227	0.968145	1.10236	1.07611	1.36847	1.09758
AT1G76040.2	63807	| calcium-dependent protein kinase 29 | Chr1:28537743-28540448 FORWARD LENGTH=561 | 201606	5	2	0.00278738	0.000745517	4.40583e-05	1	0.887847	14.5203	0.891703	0.99196	25.6016	21.0781	1	0.921884	11.5113	0.838015	27.8577	18.8282	26.6258	1	0.965456	9.47985	0.948178	6.35775	60.7908	15.6956
AT1G76080.1	33685	| chloroplastic drought-induced stress protein of 32 kD | Chr1:28548063-28549348 REVERSE LENGTH=302 | 201606	23	23	0.00779742	6.41041e-05	0.0214094	1	1.02914	1.0375	1.28851	1.13384	0.841203	1.18818	1	1.23197	1.00363	1.06383	0.854521	0.70713	0.827591	1	1.22749	0.916601	1.1409	1.13389	0.635131	1.06248
AT1G76090.1	40124	| sterol methyltransferase 3 | Chr1:28550592-28551671 REVERSE LENGTH=359 | 201606	3	2	0.0216988	0.155661	0.453693	1	0.896687	0.979179	0.671012	0.994298	0.431872	0.135857	1	1.05983	1.67879	0.971851	1.38604	0.674604	0.657813	1	0.647877	0.749571	0.847499	0.606305	0.583621	0.93386
AT1G76100.1	17589	| plastocyanin 1 | Chr1:28554217-28554732 REVERSE LENGTH=171 | 201606	20	18	5.27954e-06	0.00691263	0.0465902	1	1.44003	1.58716	1.67403	1.26935	2.06706	2.47478	1	1.27663	1.25756	1.46333	1.19742	1.4173	1.60098	1	1.29284	1.36828	1.33746	1.2007	1.24611	1.69761
AT1G76140.1	89405	| Prolyl oligopeptidase family protein | Chr1:28571187-28574852 FORWARD LENGTH=795 | 201606	25	25	2.90346e-05	1.44681e-05	7.56545e-08	1	1.69925	1.35092	1.70839	1.29872	2.23553	1.94861	1	1.0756	1.10643	1.19482	2.10258	1.5204	1.98735	1	1.38233	0.933248	1.32938	1.58771	2.2351	2.00733
AT1G76140.2	89063	| Prolyl oligopeptidase family protein | Chr1:28571187-28574852 FORWARD LENGTH=792 | 201606	22	22	3.51562e-20	7.42518e-19	2.90561e-14	1	0.887847	0.866903	142.512	0.99196	0.862579	0.903238	1	0.921884	0.846091	139.511	0.825627	0.806983	0.793008	1	0.965456	0.967021	163.927	0.903506	0.869703	0.928317
AT1G76150.1	34082	| enoyl-CoA hydratase 2 | Chr1:28575236-28577637 REVERSE LENGTH=309 | 201606	10	10	0.162229	0.00031998	0.00948993	1	1.514	1.67034	1.44242	0.846136	1.3345	1.04437	1	2.04698	2.37853	2.16703	3.34967	3.06855	2.9208	1	0.725389	0.783077	0.981488	0.74238	1.14811	0.629614
AT1G76160.1	60041	| SKU5 similar 5 | Chr1:28578211-28581020 REVERSE LENGTH=541 | 201606	12	9	0.00014337	0.0002638	0.00407647	1	1.97381	0.799492	1.00234	1.32201	0.864578	0.0794004	1	1.76374	0.982394	0.675619	0.814752	0.89674	0.441552	1	1.48668	0.721116	0.789237	0.676708	0.684451	0.538527
AT1G76180.1	20786	| Dehydrin family protein | Chr1:28587013-28587657 REVERSE LENGTH=185 | 201606	22	20	0.000775135	0.0213448	0.002131	1	1.79335	1.73428	1.90181	1.64527	2.44717	2.71488	1	0.741258	0.978202	1.48973	0.93308	1.31429	1.43026	1	1.18923	1.92286	1.56993	1.3357	1.28718	1.56073
AT1G76300.1	13812	| snRNP core protein SMD3 | Chr1:28625957-28627080 FORWARD LENGTH=128 | 201606	4	2	0.116127	0.0252305	0.189475	1	0.0445639	1.45764	1.4829	1.30774	0.872832	0.754863	1	0.0655081	2.60142	1.58381	0.953872	1.52635	1.48322	1	0.0365033	1.09208	0.851552	0.799329	0.880919	0.700237
AT1G76400.1	68642	| Ribophorin I | Chr1:28658713-28661672 REVERSE LENGTH=614 | 201606	16	16	0.000849179	0.893301	0.500623	1	1.52497	1.60072	0.82476	0.584265	0.944319	0.416961	1	0.799489	1.06782	1.08127	1.08208	1.01783	1.1145	1	0.935434	0.814773	0.910894	0.900197	1.38445	0.811044
AT1G76400.2	62328	| Ribophorin I | Chr1:28658956-28661672 REVERSE LENGTH=560 | 201606	18	18	2.97763e-11	2.83475e-10	0.00527204	1	0.887847	127.115	0.891703	0.99196	0.862579	0.903238	1	0.921884	98.7306	0.838015	0.825627	0.806983	0.793008	1	0.965456	86.9273	0.948178	0.903506	0.869703	0.928317
AT1G76405.2	19452	| outer envelope pore 21B-like protein | Chr1:28661994-28663673 FORWARD LENGTH=167 | 201606	7	7	0.0277029	0.0339389	0.0226179	1	0.663081	1.00471	1.32688	0.901058	0.502725	1.27511	1	0.661058	1.3828	1.38027	0.965865	0.58509	0.575695	1	2.13118	1.50296	1.36123	1.60159	0.772133	1.64162
AT1G76450.1	27490	| Photosystem II reaction center PsbP family protein | Chr1:28684618-28686109 FORWARD LENGTH=247 | 201606	13	13	0.0123903	0.0101484	0.00780381	1	0.612685	0.82699	0.912789	0.915849	1.0127	0.903109	1	0.984811	0.837458	0.839317	0.750627	0.651871	0.692801	1	0.853295	0.825988	0.854274	0.677457	0.642864	0.642921
AT1G76550.1	67559	| Phosphofructokinase family protein | Chr1:28722900-28726929 REVERSE LENGTH=617 | 201606	17	6	3.05495e-05	0.168123	0.00621673	1	1.02903	0.823498	0.680782	0.439307	0.497804	0.214661	1	0.973617	0.968251	0.761362	0.7071	0.635593	0.621809	1	0.884426	0.546967	0.501455	0.693065	0.497836	0.49373
AT1G76680.1	41168	| 12-oxophytodienoate reductase 1 | Chr1:28776982-28778271 FORWARD LENGTH=372 | 201606	27	19	0.00929677	1.15788e-05	0.000401756	1	1.12451	1.20335	1.3855	1.43627	1.78985	1.46103	1	1.38179	1.23685	1.54653	1.53791	1.94682	2.22026	1	1.46812	1.94434	1.83994	1.94254	1.33956	1.63535
AT1G76680.2	44015	| 12-oxophytodienoate reductase 1 | Chr1:28776982-28778271 FORWARD LENGTH=397 | 201606	20	13	1.41267e-06	1.52598e-21	2.23141e-11	1	0.00552602	0.00539566	0.00555002	0.00617403	0.00536875	0.00562182	1	0.00630395	0.00578567	0.00573044	0.00564573	0.00551824	0.00542268	1	0.00537147	0.00538018	0.00527534	0.0050268	0.00483873	0.00516484
AT1G76690.1	41567	| 12-oxophytodienoate reductase 2 | Chr1:28778976-28780355 FORWARD LENGTH=374 | 201606	10	2	0.000690518	0.00232018	0.0583126	1	0.846066	0.946544	1.14261	1.3182	1.72137	1.24473	1	1.19468	1.30167	1.14002	1.34925	1.90463	2.10675	1	1.10083	1.642	1.55541	1.64786	1.11406	1.18559
AT1G76720.1	131362	| eukaryotic translation initiation factor 2 (eIF-2) family protein | Chr1:28794144-28798780 REVERSE LENGTH=1191 | 201606	5	1	1.74533e-21	9.58098e-05	0.00333726	1	0.887847	0.866903	17.8341	0.99196	0.862579	0.903238	1	0.921884	0.846091	19.437	0.825627	0.806983	0.793008	1	0.965456	0.967021	22.4113	0.903506	0.869703	0.928317
AT1G76730.1	39559	| NagB/RpiA/CoA transferase-like superfamily protein | Chr1:28803033-28804703 REVERSE LENGTH=354 | 201606	4	4	0.371436	0.397585	0.539249	1	0.178024	0.584697	0.453717	0.654848	0.429094	0.750342	1	1.84377	0.878035	1.66602	0.315096	1.11325	1.59918	1	0.565277	0.413252	1.07225	0.400897	0.388228	0.54808
AT1G76810.1	142116	| eukaryotic translation initiation factor 2 (eIF-2) family protein | Chr1:28831366-28836310 REVERSE LENGTH=1294 | 201606	17	16	0.00765823	0.226655	0.0246984	1	1.04377	1.3952	1.39517	1.41297	0.935975	0.471781	1	0.938215	1.43712	1.31885	1.4292	0.910262	0.924567	1	1.65067	1.33362	2.13435	1.60049	1.49322	0.877714
AT1G76850.1	121902	| exocyst complex component sec5 | Chr1:28848013-28854282 FORWARD LENGTH=1090 | 201606	12	11	0.00135997	0.079596	0.0683187	1	0.847092	0.750801	0.894223	0.723108	0.791335	0.1647	1	0.713853	1.17744	0.602492	1.2561	1.26287	0.577001	1	0.873391	1.31848	0.860593	1.16404	0.705355	0.618988
AT1G76970.1	49255	| Target of Myb protein 1 | Chr1:28922841-28924854 REVERSE LENGTH=446 | 201606	4	3	0.0865639	5.38774e-05	0.0207201	1	0.887847	0.866903	0.891703	6.79254	0.862579	3.59736	1	0.921884	0.846091	8.38015	19.1647	0.806983	8.24546	1	0.965456	0.967021	15.6659	9.24605	0.869703	15.8465
AT1G77060.1	36566	| Phosphoenolpyruvate carboxylase family protein | Chr1:28951804-28953449 REVERSE LENGTH=339 | 201606	7	4	0.142981	0.0556652	0.229786	1	1.2424	0.691085	1.4206	1.24634	1.31789	1.73953	1	2.09813	1.35053	1.26083	0.960722	1.63083	1.53205	1	1.25887	1.49718	0.870425	1.24786	1.06409	2.13349
AT1G77090.1	28501	| thylakoid lumenal protein (Mog1/PsbP/DUF1795-like photosystem II reaction center PsbP family protein) | Chr1:28960576-28961875 REVERSE LENGTH=260 | 201606	12	12	0.000250629	0.000496636	0.00962857	1	1.36812	1.20348	1.51464	1.33431	1.92833	2.02126	1	0.945083	0.559199	1.01886	0.743458	0.931098	1.25257	1	0.943888	1.09165	0.836616	1.04666	1.2841	1.24631
AT1G77122.1	36876	| Uncharacterized protein family UPF0090 | Chr1:28977427-28978674 REVERSE LENGTH=323 | 201606	4	4	0.399856	0.0305043	0.0872243	1	1.27268	0.871341	1.14561	0.848734	0.936824	0.777597	1	1.6983	1.17155	1.08133	1.12897	1.0416	1.02453	1	2.54976	2.24949	2.52255	1.49273	1.71347	1.99427
AT1G77140.1	64942	| vacuolar protein sorting 45 | Chr1:28984163-28987681 FORWARD LENGTH=569 | 201606	7	7	0.0403762	0.0249919	0.151043	1	2.1185	2.5875	1.77961	0.973777	1.53747	0.719428	1	1.10592	2.73573	1.51607	1.8235	2.1203	1.42961	1	1.39535	0.638596	1.04136	0.799302	1.44713	0.514934
AT1G77180.1	69423	| chromatin protein family | Chr1:28999791-29001632 REVERSE LENGTH=613 | 201606	6	6	0.000577139	0.813914	0.382954	1	2.11793	6.24535	2.14533	1.43282	2.08179	6.09383	1	0.911821	1.10693	1.3735	1.31419	1.59434	1.69479	1	0.806144	1.23696	0.795133	1.36268	1.89875	1.40242
AT1G77420.1	42819	| alpha/beta-Hydrolases superfamily protein | Chr1:29093641-29095442 FORWARD LENGTH=382 | 201606	4	4	0.908018	3.73065e-05	0.000261329	1	1.33833	1.25219	0.912666	1.09684	1.65603	1.73992	1	0.363662	0.589805	0.838015	1.12767	3.4886	4.73172	1	0.649127	0.928564	0.91047	0.0867574	3.87562	1.7856
[truncated: 4,111 more rows]

## Sheet: Table S2
Table S2. Transcript-specific primers used for relative expression analysis by RT-qPCR.
Gene	Accession	Primer
NEET	AT5G51720	F	GAGAGCAGAAGGCGGTGGAGGTA
		R	GTTTCTTGAGAAGAAGAGGGCC
Zat12	AT5G59820	F	GGCGAATTGTTTGATGCTTT
[truncated: 13 more rows]
